# Supplementary material for: Celsr1 adhesive interactions mediate the asymmetric organization of planar polarity complexes
Source: eLife. 2021 Feb 2;10:e62097. doi: 10.7554/eLife.62097 (PMC7857726; doi:10.7554/eLife.62097)
Supplement: Figure 1—source data 1. [file elife-62097-fig1-data1.xlsx]

## Sheet: polarity_tensor (Fig1D-wtwt)
1 72834 135.598539143806 121.497762034215 -6.09892582487868 3.91071192703661 -0.297477828909075 0.190746719495775
2 447 6.63982102908277 365.982102908277 -15.3156116282064 13.8054726887321 -0.747025792146609 0.673368091435878
3 688 17.9927325581395 381.292151162791 -6.60280178802323 -17.8562756272767 -0.322054603878901 -0.870947812537132
4 2068 20.3471953578337 429.291102514507 24.3460157644338 15.5305846501868 1.1874877839384 0.757511197230879
5 756 10.1507936507937 470.252645502646 2.76331218350979 -0.598194071498251 0.134781784948965 -0.0291771827966311
6 673 19.6433878157504 492.448736998514 7.90369067025064 -2.8377887662657 0.385506039664261 -0.138414413509952
7 295 6.4135593220339 524.620338983051 -2.28555906184738 7.7907228830349 -0.111479163230411 0.379995985428068
8 523 12.17017208413 547.588910133843 -0.566614684235899 0.710885593396562 -0.0276368840898059 0.0346737620686762
9 491 12.7128309572301 567.894093686354 -4.23820442882883 -4.41988839156586 -0.206720312422541 -0.215582028786125
10 1175 26.0817021276596 586.388936170213 3.46798207419236 -4.01112439323287 0.169152373343851 -0.195644382346112
11 273 4.64102564102564 614.007326007326 -18.2522168076529 1.36539732345346 -0.890260020308793 0.0665978637946914
12 370 13.6108108108108 640.237837837838 -9.97347913168758 27.0892225615013 -0.48646089556654 1.3212889196911
13 805 14.1229813664596 662.573913043478 -13.3730447131839 1.53091685133647 -0.652276223946542 0.0746711526344802
14 152 4.26315789473684 684.914473684211 -38.2584749526259 -10.6338501730046 -1.86607418963088 -0.518670787814134
15 150 4.63333333333333 711.886666666667 -0.655653611614866 -4.30055675254872 -0.0319797975085988 -0.209761574838288
16 839 11.7187127532777 737.212157330155 -11.8728958607686 -13.3537837733425 -0.579105794190445 -0.651336763010097
17 169 3.88757396449704 776.615384615385 -37.568467383687 -3.79859860123883 -1.83241876252248 -0.185278341996568
18 123 3.08943089430894 801.650406504065 -17.6470560228864 -6.00713130072777 -0.860743032963427 -0.293000510027975
19 1414 21.7164073550212 824.524752475248 62.532475268411 -9.39188927491689 3.05004938792272 -0.458093590753299
20 856 18.8855140186916 853.195093457944 25.8175459573179 30.2698704349278 1.25926232580406 1.47642643916241
21 159 4.0377358490566 868.037735849057 -11.3745928865946 -10.4094821977639 -0.554800844244743 -0.507727139691859
22 158 6.24683544303798 891.132911392405 -3.90470780982616 -11.7831321926711 -0.190453865999346 -0.574727531219669
23 591 9.13874788494078 915.150592216582 -3.10660390018982 -2.67351054689687 -0.151525991632685 -0.130401670046908
24 469 6.39232409381663 963.247334754797 -0.801814283923216 4.92749534993295 -0.0391088495283524 0.240340784712982
25 706 16.7181303116147 990.281869688385 7.77012332776195 -9.21863326805896 0.378991232926555 -0.449642951698908
26 254 5.80314960629921 1011.41732283465 -0.102233134868074 3.84052177014326 -0.00498646677732438 0.187323163269161
27 1132 23.8083038869258 700.939929328622 8.42095876561061 -7.7504798866645 0.410736021859475 -0.378033115320642
28 720 23.4472222222222 518.177777777778 14.4604642239921 -2.51900910507553 0.705315595874801 -0.122865793271878
29 704 19.7599431818182 945.107954545455 2.36107314789682 -12.0679370503898 0.115162396477552 -0.588619015256305
30 1034 27.8027079303675 880.446808510638 16.6562196756022 -19.003105803955 0.812414547938747 -0.926884966206718
31 721 27.6837725381415 625.069348127601 5.66006013240593 -5.97792576431348 0.27607195890375 -0.291575996955655
32 918 27.6056644880174 757.216775599129 32.9680293737872 -10.0232586473342 1.60803034552727 -0.48888891365758
33 1427 30.6986685353889 788.344779257183 25.3772267179927 2.67112401627372 1.23778555840233 0.130285265950713
34 304 19.2171052631579 607.5 9.90931143400418 4.06222020432835 0.483331087475567 0.198136603335099
35 634 29.993690851735 1012.47949526814 23.243960708629 -11.1084491389119 1.13373455677145 -0.54181956417811
36 917 30.9323882224646 917.15812431843 -11.9619887191679 -5.35252578760764 -0.583451338118822 -0.261071833991198
37 553 34.5352622061483 967.072332730561 15.340507315661 -20.7143610410084 0.748240090412544 -1.01035220408513
38 1442 44.3474341192788 671.307212205271 6.77470920470348 6.56845959631383 0.330439464845533 0.3203795481522
39 664 36.7530120481928 387.734939759036 -0.264048603401216 8.2886106717106 -0.0128790884692928 0.404280684515802
40 163 30.9938650306748 542.852760736196 8.50375724531811 2.15232753569378 0.414774554658133 0.104980736084316
41 773 43.156532988357 494.441138421734 -10.4857383976094 -28.0874100995233 -0.511446569870589 -1.36997596232468
42 871 45.9896670493685 716.235361653272 0.750447236170729 -16.7775724310746 0.0366033988503745 -0.818333582743663
43 546 43.2930402930403 986.796703296703 8.76987774028126 -24.8344388526174 0.427754700562994 -1.21131083803577
44 511 42.7651663405088 464.724070450098 -22.8370746733088 30.6134698808098 -1.11388850881548 1.49318565547529
45 198 39.0707070707071 556.181818181818 -4.02573737163685 1.4474242219429 -0.196357136889179 0.0705987623751018
46 667 45.1259370314843 347.254872563718 -3.37909549027212 -37.5927548824742 -0.164816890545245 -1.83360339611474
47 642 47.9065420560748 529.144859813084 -10.4793973525341 -12.6545232518011 -0.511137282567192 -0.617230019009139
48 789 47.9087452471483 416.673003802281 -2.49539751847055 1.12126056565599 -0.121714127597949 0.0546899844808884
49 1489 65.8690396239087 369.517125587643 12.5484947180776 20.6585211554771 0.612058429958848 1.00762858874837
50 808 56.7784653465347 950.52103960396 -2.23848268932691 -17.3734954869186 -0.109182992151698 -0.847399995738258
51 1353 58.7220990391722 578.008130081301 -3.76794893666295 -1.19422840034368 -0.183783390928688 -0.058249023181531
52 1654 63.9467956469166 619.493954050786 0.286807293673014 -0.0427863646478305 0.0139891537439435 -0.00208692403020032
53 773 57.0375161707633 811.539456662354 57.3685074025079 -1.99611995031607 2.79817455071143 -0.0973616413959138
54 344 48.0232558139535 834.235465116279 9.21008084731501 3.71160128376622 0.449225803560387 0.181035009012078
55 581 50.7573149741824 922.388984509466 -7.08645782819844 -13.3359649260662 -0.345645143082244 -0.650467640782081
56 125 48.408 546.896 -4.64327990786161 2.09351958558251 -0.22647804968759 0.102112352073096
57 1302 65.7588325652842 731.701228878648 9.65308632372448 -9.36244335728569 0.470833593374709 -0.456657352979848
58 105352 349.032472093553 917.890614321513 14.9754851360921 0.357755572441066 0.730435970703645 0.0174496877033274
59 415 56.4120481927711 894.342168674699 3.46193276904953 -32.8162473475058 0.168857315785853 -1.6006271094588
60 586 58.8703071672355 650.680887372014 4.02481903729902 3.95441867827498 0.196312344722022 0.192878535792675
61 1138 68.579086115993 844.609841827768 17.8666271285459 -28.4970371440324 0.871452711631158 -1.38995570422709
62 844 63.6469194312796 873.174170616114 13.4955852279295 20.3113027008812 0.658253192240077 0.990692853670401
63 392 60.4464285714286 446.19387755102 33.8598588323273 29.9716631859791 1.65152972536911 1.46188124751238
64 1398 67.0793991416309 766.199570815451 12.0583565922561 5.51594821389654 0.58815172413531 0.269042835764849
65 977 69.7001023541453 473.184237461617 10.9713314353919 -40.7125441168998 0.535131586996665 -1.98577250830907
66 319 63.5705329153605 547.87460815047 4.37423815261745 7.85187452357123 0.213355418008837 0.382978683985701
67 1334 71.2758620689655 511.814092953523 23.8008635498348 -59.3916886819019 1.16089774138331 -2.89685612050992
68 144 65.0347222222222 434.013888888889 21.5737830043576 45.223607373418 1.05227089388638 2.20580163182234
69 998 76.0571142284569 912.629258517034 15.8583065674998 -17.7513441075298 0.77349598000205 -0.865829730833117
70 638 71.4153605015674 398.935736677116 58.4175365968091 2.7593197913046 2.8493414178194 0.13458705423745
71 970 76.7618556701031 328.938144329897 0.841871212580643 -14.5022691801021 0.0410626441000406 -0.707354651265592
72 472 75.0338983050847 420.358050847458 18.2287014866129 -8.64736164521432 0.889113050030757 -0.421778923350183
73 1328 80.5685240963855 686.165662650602 -2.15921453149659 2.37589369609021 -0.105316652378094 0.115885275329731
74 1108 81.1823104693141 798.823104693141 -8.54777262930215 -9.7049518249288 -0.416921424654938 -0.473363356342247
75 882 90.7210884353742 552.136054421769 2.28175073517127 2.99476473936045 0.111293410397221 0.146070986652165
76 536 81.2630597014925 648.554104477612 19.8965328532569 7.02126786090207 0.970462269250944 0.342465473334685
77 534 83.8857677902622 303.097378277154 0.586900112195786 12.4807653198239 0.0286263148914371 0.608754898333056
78 612 86.3316993464052 439.929738562092 13.9216539022237 -27.1126422437414 0.679034881972748 -1.32243122514399
79 623 91.4446227929374 584.473515248796 5.68971974502092 6.92152776318239 0.277518619745402 0.337600605556855
80 704 95.7670454545455 463.711647727273 29.7146026787405 -8.63783462523572 1.44934300655203 -0.421314238699053
81 254 89.1417322834646 600.811023622047 0.845625706169327 -1.58070898141683 0.0412457712003668 -0.077099786000153
82 712 88.8061797752809 876.676966292135 -12.694670266006 -9.46797234747338 -0.619188207543609 -0.461804576571246
83 723 94.9170124481328 355.183955739972 -0.866634203605329 -14.8063614223527 -0.0422704700383836 -0.722186886090253
84 800 93.65375 727.4925 -0.576299592375781 -13.2399443190425 -0.028109269806465 -0.645784192822866
85 871 101.886337543054 494.00803673938 19.5365969217477 -42.4404540268073 0.952906233561025 -2.0700520852885
86 508 100.13188976378 401.064960629921 19.5160368770323 14.9973860521641 0.951903408204589 0.7315041976589
87 587 98.7052810902896 521.732538330494 -25.4368120559354 -10.4917190656692 -1.24069185985195 -0.51173827962423
88 811 101.208384710234 838.339087546239 26.365051032622 11.937040804442 1.28596713019007 0.582234492444428
89 1445 107.748096885813 619.229065743945 -0.104351515310513 -15.0551913273007 -0.00508979172878545 -0.734323675750759
90 298 96.5671140939597 416.909395973154 -5.35044824594998 9.75765538623297 -0.260970500969689 0.475933996065161
91 531 108.404896421846 386.702448210923 32.1455252625268 5.39853809850483 1.56791234043718 0.263316104989371
92 371 99.9029649595687 565.698113207547 10.3996635510755 -1.87533983740834 0.507248230817812 -0.0914705374876445
93 1203 108.5893599335 765.265170407315 22.4624113919435 -23.9977169786254 1.09561414006387 -1.17049935522341
94 1093 115.632204940531 324.387923147301 31.513741141537 -9.50681647935113 1.53709678798618 -0.463699216438764
95 413 98.3438256658596 803.874092009685 25.3178397664809 -8.92216045306218 1.2348889333394 -0.435182357838913
96 1100 112.956363636364 659.525454545455 7.50700303796407 13.132773536183 0.366157423367548 0.640556890061207
97 289 107.377162629758 860.117647058824 25.2526439072752 -7.41662904703601 1.23170897621133 -0.361749391628343
98 1100 111.568181818182 691.786363636364 -0.994076542570604 -9.60360961357729 -0.0484865269957968 -0.46842034475704
99 441 104.553287981859 304.471655328798 -17.1342811239599 -3.16499756760056 -0.835732208429461 -0.154374168820301
100 628 111.794585987261 881.987261146497 17.0179723082512 -0.862579550024932 0.830059194037504 -0.0420727025005075
101 761 112.433639947438 439.218134034166 13.1310922642173 -18.6861500530222 0.640474885270769 -0.911425308005414
102 480 115.858333333333 369.522916666667 -5.04507673638202 -2.82779209264979 -0.246075869310717 -0.137926821293066
103 336 110.869047619048 535.833333333333 -18.064599264264 9.77074351545915 -0.881108890900902 0.476572375409078
104 228 109.473684210526 731.324561403509 -5.82778632230216 26.819157254639 -0.284252878668012 1.30811636382539
105 124 108.629032258065 793.25 -10.7882649346614 -13.8449607988262 -0.526202436725456 -0.675294141628289
106 900 120.501111111111 272.741111111111 17.9046108268033 -25.3713135023213 0.87330538346485 -1.23749713866903
107 578 117.653979238754 822.257785467128 21.798069372482 12.2208195326886 1.06321056158513 0.596075926558123
108 1305 127.493486590038 569.994636015326 -2.44846949609605 -19.7891360305896 -0.119425192363811 -0.965223941296786
109 685 126.423357664234 794.124087591241 -0.55592466354306 -11.2235615222328 -0.0271154735598193 -0.547434222046411
110 697 127.364418938307 349.110473457676 5.31275051446551 -5.64023088333613 0.259131777292964 -0.275104778431064
111 723 129.438450899032 417.843706777317 0.472875687662872 5.64658366895942 0.0230647226985475 0.275414638384932
112 862 128.931554524362 460.055684454756 21.2497762779811 -12.7116691885395 1.03646732121113 -0.620017337576378
113 965 128.475647668394 711.680829015544 -9.56200089320112 -11.5303082017032 -0.466390860851744 -0.56239592823108
114 579 126.540587219344 490.203799654577 17.5961226530504 -11.9375737600989 0.858258735119365 -0.582260487594434
115 913 138.423877327492 515.58269441402 -3.75428667747547 -27.6894604978804 -0.183117008139688 -1.35056579290942
116 479 126.609603340292 537.37369519833 -13.3367656791278 -43.6359715870115 -0.650506697870018 -2.12836398781755
117 1880 143.235106382979 762.876595744681 13.9496344331588 -9.62450934937614 0.680399644856131 -0.469439738697667
118 128 124.5546875 635.7578125 -3.32054373323494 -8.03002271906942 -0.161961002465547 -0.391667941724284
119 593 130.659359190557 866.900505902192 35.3303191030502 5.1468056712409 1.72325208130388 0.251037743507581
120 547 132.36563071298 291.162705667276 14.2885222131056 -18.8719000200889 0.69692904756032 -0.920485345544737
121 457 137.973741794311 399.509846827133 3.73918764824824 23.7022401769016 0.182380546250805 1.1560873423553
122 265 131.705660377358 847.094339622642 32.3290365605045 18.793438623762 1.57686318589262 0.916658355923498
123 428 135.586448598131 377.934579439252 -7.77140671657335 -20.5015453087987 -0.379053830788576 -0.999972021772173
124 756 142.287037037037 592.756613756614 -1.00831735588093 -22.172767554168 -0.0491811290203327 -1.08148663261545
125 547 137.327239488117 651.692870201097 -0.118458477562945 -8.46874510353103 -0.00577786510823814 -0.413066821817411
126 395 138.156962025316 832.270886075949 1.36395702406945 37.6338498939877 0.0665276125494664 1.835607823641
127 986 148.541582150101 622.328600405679 -1.2036337280596 20.3263153353329 -0.058707772238241 0.991425101615552
128 686 147.810495626822 900.883381924198 38.0582113356019 20.3122499009283 1.85630624233781 0.990739053775408
129 762 151.938320209974 437.698162729659 20.3193964994081 13.7150210121127 0.991087632305612 0.668956270542407
130 904 149.850663716814 309.913716814159 30.4492363734472 -47.5574452583304 1.48517509286031 -2.3196356161934
131 521 144.508637236084 808.201535508637 36.2632073729223 -8.81995199624385 1.76875412299199 -0.430197094744478
132 1029 164.74732750243 885.249757045675 24.5157441278016 -11.1790088101043 1.19576636060726 -0.545261143629566
133 1222 154.672667757774 722.355973813421 -13.6189022811607 -4.25638528840548 -0.6642680365448 -0.207607091962063
134 797 151.060225846926 471.020075282309 22.9511410916663 -34.0152167764749 1.1194521492759 -1.65910737842734
135 670 150.722388059702 682.019402985075 7.45879369712713 -2.06198293669559 0.363805991253583 -0.100574137949606
136 1800 159.332777777778 226.714444444444 15.0179572479304 -4.02117810501285 0.732507566912819 -0.196134756624905
137 597 157.329983249581 332.477386934673 93.3943771028915 10.6893376600895 4.55535242280737 0.5213772147594
138 693 157.958152958153 352.940836940837 38.009720124373 -35.6798659632439 1.85394106186969 -1.740301385404
139 1028 158.482490272374 273.503891050584 23.1543286733446 40.5531841350616 1.12936271424988 1.97799965407647
140 605 155.4 378.181818181818 -2.06845959032022 9.34951706382467 -0.100890039620519 0.4560268672476
141 954 156.79035639413 858.114255765199 32.247157787177 -7.18053447769449 1.57286951218309 -0.35023377364551
142 876 156.304794520548 548.731735159817 2.6117185915136 9.59280419997649 0.127387739846859 0.467893305886471
143 287 153.445993031359 640.648083623693 2.46720928906846 -1.97104861863765 0.120339234129149 -0.09613877600458
144 243 153.79012345679 825.868312757202 -22.1237743614673 -2.84231305781263 -1.07909696777702 -0.138635087849233
145 606 159.29702970297 490.899339933993 21.1539302422699 -13.9355357704347 1.03179238804559 -0.67971197628988
146 1635 174.646483180428 651.379204892966 -9.6769703984753 -3.01103067720872 -0.471998549779555 -0.146864365029802
147 769 163.501950585176 414.829648894668 6.6111509056892 7.99755457979789 0.322461835819065 0.390084293741583
148 1505 170.495016611296 580.560797342193 34.8475135606026 -6.05876640122259 1.69970302550676 -0.295519035098085
149 81 158.283950617284 703.604938271605 -7.37977800645512 4.48534330473503 -0.359951965678296 0.218774621386869
150 852 172.537558685446 520.921361502347 7.09529695046363 -1.24613402419446 0.346076275215412 -0.0607807431490561
151 1088 176.020220588235 807.988970588235 20.1532070976631 -15.8503350840855 0.982981670069256 -0.773107167341041
152 890 176.942696629213 697.712359550562 0.10373040632837 -6.06401619156135 0.00505949686099574 -0.295775095964711
153 1143 174.993875765529 768.478565179353 -26.0557215644892 15.6581991911342 -1.27087944733576 0.763735653416816
154 291 172.951890034364 200.068728522337 -34.8287766825657 29.2282485077123 -1.6987891259187 1.42562086481223
155 979 180.010214504597 383.576098059244 41.4234892402343 -25.3717826134174 2.02044917397703 -1.2375200197721
156 1016 182.753937007874 834.162401574803 7.58792678458766 -23.3788820915688 0.370104515223392 -1.14031540743643
157 780 177.347435897436 309.080769230769 -5.83921556585317 -3.9494904552309 -0.284810345122803 -0.192638159514355
158 792 180.896464646465 453.963383838384 11.722825257967 24.7467130839748 0.571786033565978 1.20703197452037
159 637 180.105180533752 490.740973312402 25.5439521027938 -4.49094037236727 1.24591766345144 -0.219047620858465
160 1445 193.695501730104 741.696193771626 -6.13006005597651 -18.2126456771473 -0.298996414925313 -0.888329920758757
161 945 193.845502645503 281.74708994709 42.0708323881219 14.026274951649 2.05202362490858 0.684137820348272
162 439 185.077448747153 339.435079726652 84.4847283177343 -27.979363425111 4.12078032715417 -1.36470593756165
163 968 188.202479338843 600.252066115703 -34.9441621655789 -24.4754614634516 -1.70441710434638 -1.19380155567643
164 595 187.078991596639 217.063865546218 3.78650926436233 -20.8019653959777 0.184688679195243 -1.01462514559443
165 1730 201.32774566474 250.026011560694 29.5005057863619 7.35205119223148 1.43890033508009 0.358599577940743
166 765 191.159477124183 534.419607843137 -17.8504988549869 -26.3681040262331 -0.870666047890663 -1.28611604131593
167 324 187.703703703704 360.608024691358 4.13038253949411 44.6384608148807 0.201461251651982 2.17726084729316
168 404 184.066831683168 422.519801980198 -22.3078398139774 -12.5972061664251 -1.08807484236708 -0.614434352590719
169 418 193.418660287081 401.002392344498 26.8542563217859 -19.1649415706861 1.30982833648933 -0.934778577952353
170 361 189.567867036011 676.238227146814 9.3503013095242 -11.0336627935053 0.456065119181584 -0.538171826805597
171 1339 213.827483196415 791.604929051531 37.1704478507834 -8.9269748044043 1.81300518217878 -0.435417179974152
172 1072 202.704291044776 184.997201492537 -13.3503242196948 -10.4745727517153 -0.651168021737016 -0.510901960509151
173 1015 204.809852216749 465.613793103448 -0.281280200444614 1.80972718637171 -0.0137195673051226 0.0882702511520205
174 338 198.508875739645 436.109467455621 4.7393834391482 16.7097405447975 0.231165542314736 0.815025052218792
175 293 200.447098976109 621.566552901024 18.259878117615 -22.3719551305475 0.890633704121248 -1.09120209554588
176 2196 213.79781420765 708.067850637523 12.6322594169605 -15.9638437063811 0.616144090528988 -0.778643601049618
177 999 208.465465465465 498.694694694695 -14.2630637669447 -19.707763985185 -0.695687300487346 -0.961254983467833
178 385 198.32987012987 316.116883116883 9.36493532075592 68.6363386965137 0.45677889961021 3.34776805063258
179 676 210.011834319527 636.605029585799 5.19124903742065 -32.9753023995911 0.25320548852698 -1.60838509060662
180 273 205.025641025641 300.457875457875 58.9004070812198 20.0480122342789 2.87289364118976 0.977850743661813
181 741 209.715249662618 572.901484480432 58.834089276908 -56.0044733117097 2.86965896068844 -2.73164317919787
182 735 206.285714285714 351.786394557823 -47.6791155862029 -6.28697028152306 -2.32557014073386 -0.306649781201521
183 679 212.125184094256 417.453608247423 22.6534634717794 5.94197569924497 1.10493279051972 0.289822516488309
184 1365 216.964835164835 538.352380952381 -20.9237931125687 20.0400156213784 -1.02056734683987 0.977460705298898
185 519 211.265895953757 771.917148362235 17.5710713753244 -7.57418856694118 0.857036847868512 -0.369434427526657
186 564 211.670212765957 220.769503546099 -4.64947057615718 21.3130603153406 -0.226780002296449 1.03955402837544
187 823 212.744835965978 662.65127582017 13.6282897785832 -8.0236947223445 0.664725915920988 -0.391359290859997
188 1449 222.010351966874 387.885438233264 12.1125480431852 27.9777935060726 0.590794936338689 1.36462936405993
189 1150 221.182608695652 601.590434782609 -4.78272847271539 -22.7699624390511 -0.233279715670799 -1.11061507963902
190 961 222.569198751301 328.635796045786 39.503673979499 -4.54801901978591 1.92680932786832 -0.221831657359106
191 504 222.386904761905 440.795634920635 2.46119178248044 -6.83182860920587 0.120045727559853 -0.333225489291123
192 1254 233.658692185008 152.622009569378 5.03002535081284 -0.591647559084908 0.245341731262517 -0.0288578737321228
193 126 218.571428571429 167 15.2808378651576 -8.31864057513856 0.745329686335228 -0.405745406457108
194 986 227.590263691684 195.528397565923 -1.21413204409988 0.442113582593772 -0.059219832288246 0.0215642872954311
195 906 226.426048565121 288.262693156733 -6.55218697331412 -19.1969444318193 -0.319585843703317 -0.936339531786215
196 1023 235.233626588465 468.884652981427 -32.4043251591192 -39.4360132747671 -1.5805354208895 -1.92350914679972
197 726 232.334710743802 755.513774104683 -16.1698039681514 -16.8157608039546 -0.788689404732464 -0.820196237673415
198 756 236.660052910053 504.474867724868 -21.4786182999951 -18.4842531706391 -1.04762919296143 -0.901577697465566
199 1125 242.837333333333 357.207111111111 16.5468440076715 -0.478582447846331 0.807079700923755 -0.0233430724732825
200 761 239.266754270696 247.044678055191 15.9865364543896 -50.7935162569585 0.779750449960947 -2.47747642333039
201 542 238.309963099631 649.142066420664 0.885852624610384 -2.2584113555677 0.0432078570996138 -0.110155021741266
202 1131 241.541998231653 556.267904509284 17.6033372925175 5.4720562959377 0.858610632379093 0.266901987878523
203 805 245.547826086957 626.173913043478 8.00010651884456 0.0143792420529938 0.390208765707452 0.000701353948236903
204 818 251.772616136919 135.107579462103 11.2677484784925 -1.7595130439832 0.549589460557531 -0.0858210339476837
205 1774 262.998872604284 319.202931228861 18.6235241606288 -17.1274627114514 0.908370702155532 -0.835399637316468
206 401 239.122194513716 221.079800498753 9.96183068087072 -7.18585512098752 0.485892737179531 -0.350493290396599
207 613 243.871125611746 419.911908646003 40.876847467493 -19.7490962382365 1.99378647755879 -0.963270982555987
208 1190 243.25462184874 682.984033613445 -28.6019808985831 0.559020280541988 -1.39507438268911 0.0272664636604398
209 811 249.028360049322 597.848335388409 4.96577480230761 2.32843786647252 0.242207882085735 0.113570596061759
210 226 242.685840707965 437.535398230089 -8.87990190810063 16.0178202298218 -0.433121178449464 0.781276330068835
211 1154 258.109185441941 284.590987868284 6.09205832568383 -1.49595532182578 0.29714286357105 -0.0729658884301256
212 606 247.780528052805 721.704620462046 -21.8402612962433 15.6744711304081 -1.06526849149581 0.764529324516667
213 909 258.430143014301 770.257425742574 -7.02530163881174 -12.833108432048 -0.342662222652405 -0.625940590873855
214 461 248.622559652928 187.225596529284 1.95991079473597 -2.20064738140726 0.0955955236732383 -0.107337558122949
215 243 251.069958847737 250.868312757202 6.68512989170395 -13.4664804875598 0.326070193876937 -0.656833595539814
216 1189 260.407905803196 383.705634987384 21.2663201148712 -69.8714135918038 1.03727425423855 -3.40800937983391
217 600 254.866666666667 744.091666666667 -19.22852514054 0.0536610154901244 -0.937879894947759 0.00261733997812245
218 348 255.948275862069 262.132183908046 4.17613578973203 -14.8704097118904 0.203692886850888 -0.725310869995628
219 671 256.326378539493 481.338301043219 -19.5082444827951 -32.6429741676847 -0.951523330698114 -1.59217563278547
220 787 258.039390088945 524.438373570521 -20.4119058768021 13.375513597882 -0.995599818472663 0.652396644899495
221 726 263.276859504132 577.764462809917 2.26302653949696 14.7146720651145 0.110380129397059 0.717714696772256
222 1296 269.375 448.359567901235 11.1075468912629 -13.4902046140401 0.54177555664638 -0.657990750396387
223 234 257.153846153846 343.692307692308 10.9110354240126 19.8346985398292 0.53219062213301 0.967446273018373
224 588 258.501700680272 206.697278911565 -12.2803613187246 -7.24281802288868 -0.598980103744062 -0.353271681357971
225 772 265.480569948187 704.95725388601 8.77930432166782 -6.70747251009277 0.428214486276975 -0.327159965059813
226 624 265.754807692308 169.463141025641 -1.5885618786061 1.62290742583423 -0.0774828145651146 0.0791580339587396
227 802 263.783042394015 654.172069825436 13.5951506110812 3.80667864574583 0.663109538236886 0.185672449773322
228 411 266.012165450122 412.800486618005 27.8698060802116 -23.8592105120749 1.35936222917143 -1.16374364050538
229 457 271.849015317287 489.36761487965 -8.63886713316401 -38.4369260663415 -0.421364599734038 -1.87477822234071
230 518 274.984555984556 222.389961389961 43.064806781044 -7.82642421045842 2.10050516950968 -0.381737333605775
231 545 271.269724770642 549.933944954128 -0.338441889930167 18.5778873714923 -0.0165076542196367 0.906144747398823
232 905 275.167955801105 120.122651933702 31.8432301073873 -25.858739137465 1.55316775933836 -1.26127154154924
233 895 282.31061452514 241.396648044693 2.96391708393318 -20.2681142404113 0.14456637849215 -0.988586317237032
234 882 283.958049886621 507.114512471655 8.88054044514313 -1.57097752343857 0.433152323378675 -0.0766251297943531
235 1245 286.181526104418 740.097991967872 -2.94687082834374 15.0972332800896 -0.14373493976845 0.736374290760325
236 1526 288.507863695937 624.732634338139 7.92387147838554 -3.91027981315434 0.386490367587239 -0.190725642948326
237 1220 284.338524590164 673.200819672131 -1.95184678240023 5.14507700245207 -0.0952021978727925 0.250953426915943
238 612 281.640522875817 597.078431372549 -2.13096646088744 3.38973082631344 -0.103938840127714 0.165335633806949
239 352 277.681818181818 775.511363636364 -15.4326698464711 -17.2260079562997 -0.752735358982677 -0.840206225612263
240 799 282.931163954944 288.366708385482 -2.38980578759021 -11.7952008435237 -0.116563843801268 -0.57531618505095
241 526 280.975285171103 203.446768060836 -2.89990532885042 -9.08875771409717 -0.141444176571116 -0.443308213594156
242 147371 487.261693277511 475.868481587287 11.9515207691416 -10.6133634345804 0.582940759184702 -0.517671538004769
243 747 285.31593038822 161.9906291834 -9.49213706962106 -0.20151451680052 -0.46298322167812 -0.00982896048791876
244 310 288.025806451613 263 11.1528263202491 4.12079262027719 0.543984081002277 0.200993499062432
245 2476 299.277059773829 556.119951534733 3.13855892725613 2.00436466479865 0.153084612338587 0.0977637810242145
246 572 293.575174825175 711.826923076923 2.58719080599698 2.13519895503357 0.126191386162138 0.104145281918549
247 836 303.452153110048 194.611244019139 13.3607727889069 -3.03002366400996 0.651677655363273 -0.147790756437136
248 340 290.526470588235 130.911764705882 10.1544900966861 2.26628656073377 0.495289786165086 0.110539138387751
249 125 290.68 446.504 4.97170344261892 6.92648595515003 0.242497054162725 0.337842443582795
250 1323 303.815570672714 779.959183673469 5.02800033954939 3.83101290525573 0.245242960434429 0.186859364140699
251 717 308.376569037657 169.663877266388 13.7979549040345 -9.37150435581206 0.673001408132252 -0.457099307226672
252 735 311.118367346939 133.036734693878 -10.5533681350601 12.2437826135957 -0.514745240496239 0.597195961077224
253 76 298.105263157895 518 12.2058583922237 5.61795049286468 0.595346190255155 0.274018042442629
254 1302 311.808755760369 694.994623655914 14.1993096550848 14.772462739823 0.692577665229484 0.72053346272172
255 992 315.910282258065 231.715725806452 2.14972820741695 10.919610049096 0.104853952687597 0.532608853298097
256 459 304.566448801743 258.074074074074 3.2491775522919 -7.20888546717854 0.158480085141079 -0.351616605809943
257 97 302.865979381443 152.690721649485 4.25485440689132 22.0660054388301 0.207532422533015 1.07627926279454
258 735 311.355102040816 631.970068027211 10.0306420278915 0.0254997945369664 0.489249041339279 0.00124376385847177
259 65 306.107692307692 146.415384615385 11.2182286963608 4.301556968631 0.547174111084598 0.209810360824072
260 169 309.94674556213 730.195266272189 -8.43783261655275 -1.20161421963256 -0.411559051469562 -0.0586092698134554
261 1099 325.288444040036 750.966333030027 33.4204858210252 -2.45061863597424 1.63009911066148 -0.119530017620478
262 845 321.410650887574 661.274556213018 5.47494609286378 -7.08274688855287 0.267042939013238 -0.345464140344931
263 1164 346.643470790378 597.715635738832 6.46456821757268 4.26631047269774 0.315312199789933 0.208091197255283
264 297 325.474747474747 264.276094276094 2.63330794470993 11.9543281194297 0.128440770183807 0.583077688947854
265 644 327.97049689441 213.350931677019 -1.75203380784618 1.96896921261071 -0.0854562308673016 0.0960373520476278
266 708 325.629943502825 572.381355932203 -4.8180743230889 -7.22597664078487 -0.23500372529675 -0.352450235429963
267 573 332.762652705061 178.267015706806 -0.167894214012023 4.10802442118986 -0.00818911521549542 0.200370724453814
268 166 326.253012048193 614.831325301205 0.606882873564611 13.1904821180662 0.0296009829950165 0.643371651896483
269 495 336.951515151515 111.670707070707 6.34649929489029 1.92176995407541 0.309553335394842 0.0937351871487003
270 159 325.767295597484 727.880503144654 1.75251656848299 -4.26031260621884 0.085479777732806 -0.207798648641075
271 620 334.351612903226 133.841935483871 -20.9098036085027 -1.1490262646471 -1.01988500253588 -0.0560442688403283
272 663 342.179487179487 156.303167420814 14.0679220080383 16.2656595648424 0.686169174109717 0.793364804239065
273 187 332.251336898396 251.112299465241 5.77950296477365 -1.08462504206783 0.281897836356884 -0.0529030704683427
274 339 333.769911504425 779.023598820059 12.1727525586075 -3.2687742744661 0.593731438446206 -0.15943592401066
275 1134 342.746913580247 638.145502645503 13.1567603393828 4.70457517050584 0.641726857091996 0.22946775347763
276 1359 342.348050036792 704.100073583517 13.2550743297556 -16.1719893980019 0.646522165847548 -0.788796000048723
277 1098 352.08014571949 198.242258652095 6.65751663430617 1.45827022830744 0.324723344924242 0.0711277811758382
278 362 346.472375690608 612.372928176796 -1.42731767565645 -3.52545943050609 -0.0696180566069228 -0.171955857048784
279 424 344.254716981132 577.099056603774 -6.37708900278537 -17.1016641881593 -0.311045362048859 -0.834141302829652
280 265 344.88679245283 54.1811320754717 -0.204351766989111 0.0863418723914704 -0.00996734863206226 0.00421136335814838
281 1046 357.024856596558 739.467495219885 21.5044526075452 -32.0692905636821 1.0488892728414 -1.56419395897936
282 521 349.78886756238 672.990403071017 39.0416317366596 -28.7804082449267 1.90427301127574 -1.40377725613476
283 335 353.776119402985 97.8626865671642 -11.292044494194 -2.30263996655733 -0.550774509566086 -0.112312291980426
284 200 347.68 225.255 -0.695673535092077 9.09482313314733 -0.0339317871361075 0.443604057115174
285 98 345.591836734694 66.9489795918367 -23.281980623528 2.96571394239658 -1.13558899508801 0.144654021065596
286 875 368.512 114.510857142857 -5.99747063049365 -10.2796679203102 -0.292529306525986 -0.501395390376136
287 1308 366.046636085627 55.9984709480122 35.1839742917056 -49.5474975236891 1.71611404782046 -2.41670130354766
288 707 365.61810466761 139.545968882603 11.2285566978405 6.08003040648081 0.547677863965903 0.296556196444158
289 677 368.991137370753 166.534711964549 -1.8314125121938 -11.3178251737739 -0.0893279625966204 -0.552031973717882
290 894 368.559284116331 664.177852348993 4.19868173672631 2.63353962189766 0.204792575477235 0.12845207034203
291 702 375.264957264957 81.4786324786325 29.0338807716458 -4.46591926745567 1.41614049174404 -0.217827205300098
292 381 365.708661417323 223.792650918635 -9.98181808134044 -6.59560217155192 -0.486867631557326 -0.321703439372502
293 889 376.830146231721 628.472440944882 4.23831855830407 6.82499019972514 0.206725879138629 0.332891942816887
294 918 374.443355119826 701.647058823529 9.54617897298658 -13.0978099937847 0.465619139632346 -0.638851527677361
295 436 382.596330275229 178.316513761468 16.3253949217622 -12.985862693815 0.796278422931248 -0.633391248162013
296 955 388.056544502618 757.437696335078 -4.10529325036248 5.8508471656855 -0.200237510377854 0.285377681595522
297 1481 390.916948008103 223.378798109386 20.5744152375671 -29.7316244258686 1.00352628506791 -1.45017324986459
298 920 392.205434782609 726.044565217391 16.9591339020349 -37.6741338186245 0.82718932451617 -1.83757269004289
299 674 387.771513353116 662.508902077151 -9.62010304727221 -9.83410682242117 -0.469224819346124 -0.479662948983637
300 591 393.423011844332 99.6412859560068 -8.4485815621072 -0.557548619597155 -0.412083336085971 -0.0271946827410895
301 109 384.642201834862 193.247706422018 9.33285714292521 16.9499357450341 0.455214272170815 0.826740680303544
302 1038 398.918111753372 43.8227360308285 68.523596880597 -39.2669276838699 3.34226901824734 -1.91526192164497
303 858 393.018648018648 137.550116550117 -3.93988544602138 -10.7289654624535 -0.192169670903682 -0.523310078504619
304 595 400.603361344538 195.23025210084 -28.7034538139017 -6.19988328916733 -1.40002376941865 -0.302402074284587
305 1002 408.913173652695 75.3642714570858 16.2946165075634 -19.1117378331576 0.794777192043052 -0.93218354191088
306 1218 413.574712643678 707.191297208539 16.7953663570539 -22.1181653882776 0.819201489424292 -1.07882338760655
307 613 409.911908646003 161.192495921697 14.1715294141099 -27.6237712472927 0.691222671578297 -1.34736177039651
308 318 403.827044025157 666.51572327044 1.25709752065724 -3.25189825282312 0.0613154925817671 -0.158612788523671
309 333 413.786786786787 6.17417417417417 19.3724286982638 -27.2211173965965 0.944898855196356 -1.32772214913429
310 1587 429.441713925646 113.725897920605 28.627362158519 12.766718391686 1.39631236496952 0.622702387026956
311 197 410.274111675127 681.086294416244 2.19503857858755 -9.18663577071448 0.107063986262347 -0.448082259486234
312 557 417.132854578097 138.601436265709 12.462015393007 -4.41954739546146 0.607840362284932 -0.215565396548954
313 1182 421.955160744501 197.169204737733 -42.7599475690633 -28.0173369244002 -2.08563552539415 -1.36655811193611
314 12905 511.393103448276 34.848663308795 17.7452824255911 -3.19855299225297 0.865534069591376 -0.156010849632683
315 555 425.454054054054 735.918918918919 20.5498990137108 -27.0974104544583 1.00233049530833 -1.32168828782414
316 266 429.285714285714 172.334586466165 8.50239063361951 -48.0046185660359 0.414707897562649 -2.34144669383919
317 689 437.743105950653 761.605224963716 32.371285105295 21.1716595868805 1.57892387751926 1.03265714474114
318 1333 443.951987996999 81.4148537134284 12.2057464859969 13.8066544102326 0.595340731979004 0.673425730429441
319 1942 461.202883625129 156.225540679712 23.4571620793394 -2.02824330129027 1.14413354877438 -0.0989284721755416
320 189 443.312169312169 136.984126984127 23.0616862518673 -18.0772972632551 1.12484403879829 -0.881728241468498
321 1377 453.315904139434 194.897603485839 -0.377265767013194 14.1570001655671 -0.018401306150503 0.690514000996572
322 130 442.738461538462 736.169230769231 -5.22589138985572 2.71471710345159 -0.25489518472703 0.132411538232337
323 835 456.555688622754 725.45748502994 22.6657081481052 12.2878221061275 1.105530030072 0.599344006979203
324 1246 462.955056179775 764.779293739968 38.4300447355251 -21.8390388197419 1.87444258235917 -1.06520886465889
325 205 460.336585365854 702.70243902439 -2.48338371476951 -3.53496633234956 -0.121128148960966 -0.172419560428896
326 1101 475.563124432334 216.905540417802 12.2738815777181 18.654250983848 0.598664051484721 0.909869416670675
327 1075 474.521860465116 102.451162790698 36.9901802842052 -32.7746202846394 1.80421255116994 -1.59859673089036
328 595 475.447058823529 128.206722689076 34.5163419081771 25.3042396888735 1.68354998036594 1.23422558348472
329 493 475.837728194726 701.807302231237 4.76597240581015 3.66682808665824 0.232462431029675 0.17885117634196
330 579 482.93091537133 793.645941278066 -5.82733381237444 -18.8005415885271 -0.284230807294344 -0.917004806199797
331 237 477.253164556962 188.683544303797 9.06936321356009 0.149117814215298 0.442362238175171 0.00727328793596469
332 411 484.189781021898 718.306569343066 -16.8232299511679 11.8888045609541 -0.820560548662041 0.579881748141654
333 591 484.43654822335 747.351945854484 -2.17741959002992 -7.34706188728512 -0.106204612232527 -0.35835622236538
334 722 496.617728531856 79.584487534626 0.129037481693546 -41.3541290318129 0.00629386075585761 -2.01706609885752
335 157 489.662420382166 146.885350318471 6.93609206131486 52.0154016701931 0.338310985697954 2.53707442965832
336 741 498.292847503374 773.263157894737 25.0363402877361 -22.7135313270492 1.22115867063733 -1.10786262696731
337 592 499.013513513513 227.501689189189 12.488600416599 -13.4304232206664 0.609137058674875 -0.65507488625562
338 195 492.128205128205 175.871794871795 -2.62968105021621 -20.2863163467271 -0.128263866786282 -0.98947413309574
339 402 498.694029850746 196.144278606965 13.4400401678622 -0.743789500668526 0.655543957146899 -0.036278664830071
340 783 505.310344827586 142.171136653895 -12.350526774256 -37.0255940911546 -0.602402455150725 -1.80593987540821
341 629 503.055643879173 727.58346581876 21.046167966655 -2.74048667428967 1.02653623496082 -0.13366846055029
342 611 507.363338788871 255.556464811784 -3.61260864881822 -1.022287715737 -0.176206599064511 -0.0498625395569407
343 310 502.577419354839 115.638709677419 17.1861850815401 -9.07553476834507 0.838263847123893 -0.442663258514021
344 828 508.311594202899 806.666666666667 14.0334933383142 -2.54836344656537 0.684489900379253 -0.124297564378165
345 371 508.846361185984 97.7843665768194 -11.3420793033879 4.42925101109757 -0.553214979713827 0.216038694732091
346 627 511.175438596491 183.690590111643 5.50812193998767 16.378413296782 0.26866110576227 0.798864417833635
347 622 517.520900321543 700.670418006431 3.84452063444137 -8.90298847720154 0.187518209659897 -0.434247236160329
348 843 517.282325029656 749.344009489917 20.3857081402994 -16.055787456427 0.994322012183341 -0.783128198490342
349 667 524.061469265367 160.904047976012 5.374728460337 15.4957961128269 0.262154779262079 0.755814370795881
350 221 516.045248868778 213.814479638009 9.13655701291695 -4.00145456736329 0.445639645725742 -0.195172732273918
351 482 519.825726141079 237.54356846473 0.607552226365178 -0.771390301033247 0.0296336309765798 -0.0376249061854187
352 733 533.62482946794 108.163710777626 -0.54779019080098 -3.82747975529514 -0.0267187110216092 -0.186687033174613
353 816 526.310049019608 781.047794117647 32.385304962854 0.587143500057424 1.57960770232842 0.0286381862430065
354 470 526.304255319149 133.568085106383 9.35326426411987 7.01449755626618 0.456209638614282 0.342135248704649
355 967 535.973112719752 723.722854188211 6.32245601986851 -2.058954540418 0.308380613925732 -0.100426426569668
356 672 532.223214285714 191.458333333333 -5.69098723706525 8.00948921569106 -0.277580442235514 0.390666410933407
357 668 537.12125748503 810.538922155689 9.70958399082261 -33.2639495271744 0.473589292300939 -1.62246398307061
358 802 537.501246882793 268.574812967581 7.02362007967459 -18.4108467007666 0.342580203855052 -0.897997264138031
359 278 534.848920863309 216.913669064748 15.68032109047 1.45708380147382 0.764814658929384 0.0710699126775548
360 314 534.579617834395 233.738853503185 4.93082587730582 -1.08403651312088 0.240503232671926 -0.0528743647063092
361 466 539.392703862661 81.5515021459227 12.3791904749979 -28.584413453492 0.603800539946314 -1.39421752271488
362 745 547.361073825503 128.511409395973 2.08462603370895 -2.2605829940947 0.10167856511149 -0.110260944379569
363 1102 557.697822141561 768.142468239564 24.3836448732421 -16.9636269956347 1.18932316051347 -0.82740847716166
364 631 550.667194928685 163.587955625991 8.40201019704891 10.8094556297421 0.409811796971598 0.527236022334902
365 344 550.633720930233 750.813953488372 12.0370415583876 16.1661183168446 0.587112073846 0.788509635445161
366 594 551.063973063973 248.358585858586 -1.69108558117527 -10.0766888094371 -0.0824834539117331 -0.491494993658712
367 367 549.054495912806 192.125340599455 27.7973207495827 -16.9146606389771 1.35582672482158 -0.8250201212632
368 1042 564.218809980806 793.864683301344 44.1404672180802 3.2892976193808 2.15297098736692 0.160436959317939
369 639 556.574334898279 298.658841940532 25.3314448515037 -17.4983061614913 1.235552527433 -0.853487692090479
370 645 560.398449612403 89.5271317829457 14.8776661279169 -22.8776905635555 0.725664804925683 -1.11586956698813
371 345 559.255072463768 739.402898550725 44.2897102785421 10.064087815635 2.16025038424446 0.490880374562502
372 652 560.803680981595 214.049079754601 12.5381058061749 -2.12283357050897 0.611551706144476 -0.103542154769995
373 844 560.100710900474 842.427725118483 19.2205690196016 17.8373458497734 0.937491831598366 0.870024504191513
374 596 569.251677852349 142.437919463087 -13.4982633577999 9.28802472333834 -0.658383819219691 0.45302755089786
375 559 567.416815742397 279.232558139535 14.5153357220034 -8.09344275350081 0.707991977678103 -0.394761282206477
376 415 565.893975903614 233.498795180723 25.0494927984441 -24.089486201355 1.22180019021675 -1.1749754400164
377 703 571.048364153627 823.549075391181 0.0191740165075707 12.1941948234435 0.000935221212048818 0.594777294482737
378 207 565.43961352657 722.821256038647 -14.0023768623136 -11.56588728224 -0.682972180375808 -0.564131313762331
379 904 573.554203539823 186.638274336283 27.3085385786533 9.02757371777148 1.33198615630304 0.440323936868457
380 644 576.673913043478 108.854037267081 -3.88271971884302 -13.8288951033312 -0.189381387048899 -0.674510530160796
381 497 573.142857142857 252.71629778672 -7.79489777436064 -2.80928930778157 -0.380199617615632 -0.137024339703781
382 443 573.595936794582 319.282167042889 -5.97677398165928 -4.66161155382235 -0.291519818242684 -0.227372183900288
383 561 586.787878787879 126.381461675579 10.1641717359775 -17.1401221054595 0.495762012442202 -0.836017104908789
384 523 580.195028680688 160.749521988528 9.59383987173857 -1.16522989452372 0.467943821238861 -0.0568346081188423
385 982 597.081466395112 864.121181262729 3.95220667538619 10.5517536914111 0.192770644364612 0.514666495286771
386 616 579.849025974026 73.9561688311688 33.6861754963192 -51.1516408437973 1.64305824314471 -2.49494410987565
387 1366 592.142020497804 731.854319180088 17.0046378213973 -24.0901032689646 0.829408798490353 -1.17500553776444
388 543 586.298342541436 295.338858195212 24.2970578823922 -9.4800631782973 1.18509984139312 -0.462394312240523
389 830 591.527710843373 765.457831325301 -3.34007038361472 39.31069799546 -0.162913423552085 1.91739683812639
390 851 597.042303172738 317.132784958872 21.7613762756083 -22.4015620927394 1.06142083940989 -1.09264618833965
391 311 587.141479099678 342.012861736334 15.3548947612032 7.92893787940538 0.748941844489626 0.386737483557992
392 522 588.616858237548 209.701149425287 -9.73856510174857 9.21727181003709 -0.47500285891991 0.449576545976306
393 999 594.129129129129 806.691691691692 21.8973727936073 1.87544429541213 1.06805413026719 0.0914756324733965
394 468 591.155982905983 232.508547008547 27.7221642125448 -10.3654689023481 1.35216093118704 -0.505580371565902
395 388 588.788659793814 260.247422680412 -5.74160194031756 -13.2019866663928 -0.280049196974743 -0.643932791375307
396 520 597.761538461538 96.0942307692308 -7.10924557822175 43.2112005302523 -0.346756625759244 2.10764558995924
397 1008 605.525793650794 837.81746031746 21.5513701667594 -22.8201495553561 1.05117769773022 -1.11306297863407
398 756 605.903439153439 273.009259259259 0.324461986005928 -21.9470603907611 0.0158257781668446 -1.07047766499272
399 614 600.85667752443 176.312703583062 -0.497476290899506 -4.56868300952115 -0.0242646281000586 -0.222839552680273
400 264 598.128787878788 141.113636363636 0.0428087844583904 7.39968707376519 0.00208801756646579 0.360923039321272
401 1042 605.952975047985 70.8061420345489 52.5384937068974 54.3706783665053 2.56258847719169 2.65195410162302
402 623 607.430176565008 244.83948635634 0.340714012693674 2.93447169514968 0.0166184780214193 0.143130166513482
403 835 607.682634730539 925.852694610778 5.5194706485564 -7.00550160259904 0.26921464408736 -0.341696467049861
404 610 608.673770491803 951.975409836066 4.99356255440326 19.8916576107111 0.24356324209519 0.970224477120068
405 465 606.939784946237 203.109677419355 -3.20470950442135 9.94138535088946 -0.156311136261196 0.484895507085447
406 753 611.308100929615 888.316069057105 -1.63877964825928 -17.8258968034512 -0.0799322086909039 -0.86946607184772
407 366 610.191256830601 160.251366120219 -0.614101895523037 25.4744115625708 -0.0299530940127107 1.24252579256783
408 291 608.017182130584 333.85910652921 -4.49796005250861 -8.17024033998219 -0.219390008890069 -0.398507118759981
409 461 608.613882863341 355.861171366594 -12.0814111357882 -22.4123637423213 -0.589276219784763 -1.09317304361852
410 783 616.457215836526 118.501915708812 22.6122282958124 0.844543749028082 1.10292152640968 0.0411929982579517
411 145 604.848275862069 35.5172413793103 22.6984484683029 -16.3859947154159 1.10712695380085 -0.799234204910905
412 661 616.252647503782 702.597579425114 0.950436036489682 5.73161169285362 0.0463579418360151 0.279561918196288
413 1045 617.167464114833 982.789473684211 -5.1403620539331 7.39847993073531 -0.250723453197765 0.360864160381272
414 422 617.417061611374 147.018957345972 4.32861113315395 -1.85705081667757 0.211129939772288 -0.0905784823395611
415 677 622.748892171344 290.991137370753 63.1255652521432 5.71818374742603 3.07897761656074 0.278906964165495
416 1965 624.326208651399 748.653944020356 -3.89217394868367 -13.7117939219288 -0.189842521328567 -0.668798867778519
417 1016 622.181102362205 44.5 -2.10597634205327 3.96278365168591 -0.102719935929101 0.193286541103875
418 1401 625.189864382584 810.184154175589 -45.2153976292241 33.7777287794893 -2.20540119788547 1.64752379538932
419 573 625.739965095986 225.389179755672 13.0380138923032 -12.1612825666019 0.63593494614207 -0.59317198446736
420 503 626.264413518887 1015.03777335984 14.034510272939 -0.0358137419857783 0.684539501819411 -0.00174683124814869
421 560 627.985714285714 369.683928571429 4.63933318685495 -8.08353737753003 0.226285546609166 -0.394278143072977
422 353 622.13597733711 904.13597733711 5.20312590223102 -18.7897917209475 0.253784787908458 -0.916480476611198
423 318 623.518867924528 339.396226415094 -20.0140951579022 -12.3300783718459 -0.97619642312518 -0.601405075197554
424 744 630.104838709677 314.073924731183 5.6402594933402 -64.4959427757678 0.27510617389678 -3.14581839184131
425 1006 627.823061630219 187.819085487078 -20.9310458629321 0.416240479189109 -1.02092110297556 0.0203023151303389
426 868 637.957373271889 90.5887096774194 21.9866703583668 -37.06394281426 1.07240965883965 -1.80781035149177
427 78 622.807692307692 847.320512820513 -49.0532102947884 -7.10699562303152 -2.39259222336979 -0.34664688319074
428 353 627.175637393768 928.169971671388 -8.2650290832662 1.08275647405722 -0.403130482015544 0.0528119302297292
429 215 627.348837209302 9.04651162790698 -0.0929997940974481 6.92227818571921 -0.00453610646062418 0.337637207750983
430 265 626.056603773585 246.803773584906 -2.27262733096831 4.42878505802571 -0.110848412285671 0.216015967663067
431 479 637.281837160752 275.300626304802 -4.93938678687853 10.4327997442252 -0.240920794856859 0.508864463426555
432 700 634.784285714286 860.147142857143 0.836040087045363 14.9197729069085 0.0407782283497693 0.727718581862218
433 423 634.626477541371 69.434988179669 34.0133502300527 -20.2286207063741 1.65901633679261 -0.986660002489375
434 588 635.301020408163 141.323129251701 -17.0839986600469 -38.9089273421566 -0.833279658812275 -1.89780029521115
435 415 639.346987951807 702.072289156627 -0.574528845721975 2.44801320100973 -0.0280229008481849 0.119402936367342
436 1388 648.625360230548 24.7247838616715 9.15544246460999 -0.814306599356116 0.446560792060183 -0.0397181677886052
437 1080 644.531481481481 782.921296296296 13.662927320299 13.5532435035401 0.66641537747606 0.661065500364457
438 865 647.998843930636 937.661271676301 3.60581420677367 -7.18902357764676 0.175875197121595 -0.350647833284158
439 890 643.207865168539 343.383146067416 5.59449920741741 -26.0873883340139 0.272874195529206 -1.27242400815143
440 1185 657.681012658228 120.548523206751 24.9563469120937 -7.9290956779796 1.2172569580413 -0.386745180253872
441 655 642.810687022901 890.683969465649 -1.72879573973188 13.8313011838692 -0.0843227837244481 0.674627887812812
442 675 651.423703703704 957.531851851852 20.439318103874 -3.69729825970339 0.996936862081499 -0.180337372630326
443 731 639.938440492476 994.008207934336 11.0196197479335 -19.1690355472809 0.537486870990764 -0.934978263487806
444 415 641.303614457831 250.585542168675 10.5806730896328 -15.9201705365448 0.516077051841052 -0.776513422700588
445 205 637.024390243902 910.882926829268 0.0382066515071853 -4.0459505970502 0.00186354647795199 -0.197343045979381
446 448 644.301339285714 219.529017857143 17.7033891827339 -3.99097088534208 0.863490707975092 -0.194661386004724
447 518 650.776061776062 166.967181467181 2.62211390772606 -12.0614679603015 0.127894776034295 -0.588303482500253
448 1071 657.655462184874 711.787114845938 8.62102810198138 3.44802339593195 0.420494493026984 0.168178879904632
449 748 653.179144385027 197.467914438503 -20.328689268862 -20.8176265692285 -0.991540891282864 -1.01538902630893
450 439 649.359908883827 838.063781321184 39.3978185927368 0.656472284487056 1.92164618413834 0.0320197286432934
451 953 660.781741867786 67.2371458551941 8.70015134374822 -34.7354593402676 0.424353764454919 -1.69423753090288
452 1367 663.870519385516 675.225310899781 0.406255856232605 0.904269432093683 0.0198153106897437 0.04410614510358
453 822 657.732360097324 982.761557177616 28.8345149675366 -20.0303478082795 1.40641633567656 -0.976989153400494
454 526 656.72433460076 264.889733840304 -3.92071705953676 8.43466798131869 -0.191234724298515 0.411404694973722
455 1147 665.547515257193 376.64341761116 38.1263129796045 2.78559562237476 1.85962793041613 0.135868669624154
456 659 658.461305007587 819.91502276176 -7.59838052824628 10.7711181576294 -0.37061440123559 0.525366095023535
457 599 657.803005008347 147.764607679466 -1.8711056238598 15.2532082503655 -0.0912640118321892 0.74398203954333
458 1061 658.41753063148 302.082940622055 53.7289320654406 31.2570514286887 2.620652639393 1.5245766326877
459 420 656.764285714286 913.069047619048 -11.932107762033 -7.34053522947066 -0.581993881099433 -0.358037881717793
460 525 657.217142857143 740.285714285714 33.5620473189584 -11.7270691020419 1.63700383589859 -0.571993028954654
461 1409 667.63662171753 878.775727466288 -8.26059070388376 -1.38711712958105 -0.402913998080425 -0.0676572570315799
462 539 663.482374768089 1014.26901669759 29.033994277213 -25.3952190741354 1.41614602802874 -1.23866314360273
463 80 655.9125 850.825 11.2587870495497 -7.49429862779861 0.549152362861583 -0.365537760092063
464 556 661.321942446043 232.820143884892 4.2789208819622 3.09813396901449 0.208706275594873 0.151112866959686
465 430 663.548837209302 102.886046511628 -11.1966832722508 -8.43475357306228 -0.546123223408439 -0.411408869749213
466 375 660.882666666667 347.226666666667 22.6904989838381 -13.2791355983158 1.10673921414842 -0.647695764959524
467 910 672.384615384615 771.237362637363 9.05570890722474 2.73640201063326 0.441696243290083 0.133469229257564
468 155 664.883870967742 178.412903225806 -4.95361420124911 -48.8360162805327 -0.241614743342129 -2.38199848839612
469 483 667.975155279503 650.120082815735 3.0322829264803 15.0402310383902 0.14790095297238 0.733593980982739
470 264 666.337121212121 9.15530303030303 -0.937982558519773 6.78300258279414 -0.0457505178903519 0.330843978063036
471 491 668.989816700611 404.399185336049 36.358563237365 -5.54490627438512 1.77340514783515 -0.270455278088449
472 904 675.304203539823 798.713495575221 23.1465184058375 8.24094732029429 1.12898176496669 0.40195588327949
473 792 676.858585858586 329.55303030303 16.1136555122655 -12.2327328426225 0.785950738738953 -0.596657003566763
474 732 679.226775956284 426.756830601093 1.25674417225721 -46.3621804138806 0.061298257855865 -2.26133603998805
475 1345 685.119702602231 847.031226765799 2.55277092549132 -11.841392472771 0.124512541129728 -0.577569202381673
476 1638 688.354700854701 931.373015873016 -0.22535519733945 -0.534550482714051 -0.0109918003207146 -0.0260729383511131
477 1410 683.770921985816 44.3304964539007 -4.97638286615343 -0.680483560250442 -0.242725295133932 -0.0331908893342945
478 205 672.078048780488 186.980487804878 35.9453924403457 -20.5443399685794 1.75325255782257 -1.00205935040118
479 725 677.886896551724 254.08 1.37485817751404 -0.0775154633639118 0.0670593211736426 -0.00378085131881991
480 645 678.341085271318 211.804651162791 -1.41115390448204 -11.4180319616718 -0.0688296614543973 -0.556919604517426
481 871 681.780711825488 747.292766934558 33.1751040026612 1.93140306008623 1.6181305029629 0.0942050461933966
482 600 681.926666666667 101.758333333333 -5.76939773513389 -6.14648513632754 -0.281404949271489 -0.299797555549544
483 882 683.378684807256 283.362811791383 42.3625008037858 70.6608641914437 2.06624988204702 3.44651518514373
484 728 682.417582417582 962.619505494505 8.5112188443609 -16.3888662732473 0.415138497481373 -0.799374266425637
485 204 678.132352941176 826.779411764706 3.38209032596076 -4.55808626986309 0.164962964992479 -0.222322691974387
486 657 681.313546423135 157.019786910198 -7.25953707222467 1.5759300080628 -0.354087160450634 0.076866689442072
487 652 682.443251533742 997.743865030675 14.7617503039879 -12.245689524586 0.720010958883166 -0.597288971511782
488 825 693.534545454545 10.4945454545455 14.130841655989 -4.61321936127095 0.689238108018004 -0.225011833112348
489 782 687.757033248082 715.576726342711 5.80044748323089 32.3725585705314 0.28291941459166 1.57898599135448
490 910 696.083516483517 452.424175824176 15.7575817639682 -17.8075740868741 0.768583082758794 -0.868572373169695
491 974 695.356262833676 185.009240246407 2.28120007925691 -46.41420268718 0.111266551909254 -2.26387344958449
492 915 691.626229508197 368.302732240437 -10.5521932083038 -13.6256637361627 -0.514687932919358 -0.664597829529992
493 1409 704.818310858765 904.602555003549 17.323353620856 9.50907038383783 0.844954303843971 0.463809151635965
494 451 691.288248337029 228.381374722838 15.4782778762849 -32.1678634273316 0.754959910990587 -1.56900189439451
495 487 694.297741273101 312.090349075975 -26.5871001386758 7.10156366653379 -1.2967976744329 0.346381937088415
496 704 698.346590909091 68.3735795454545 3.223631074135 -30.7963018866422 0.15723404426821 -1.50210336815319
497 1367 705.469641550841 138.679590343819 18.39724562291 32.37895563055 0.897333865495749 1.57929801081174
498 588 701.513605442177 994.380952380952 18.5695386573104 5.77597382204188 0.905737535138775 0.281725700845173
499 426 703.753521126761 1016.82159624413 41.68729391277 -3.6931511348719 2.0333163646095 -0.18013509476591
500 641 698.617784711388 403.762870514821 -3.73752723360247 19.0653770443779 -0.182299558785455 0.929922273748469
501 1356 705.016224188791 685.466076696165 -1.3427445526203 1.27281650417853 -0.0654929647879296 0.0620821930180138
502 367 695.771117166213 342.160762942779 -7.77320601016175 -25.7048011677333 -0.379141592136331 -1.25376314837685
503 735 697.183673469388 499.839455782313 -20.6342032136209 -6.1674109866672 -1.00644247028184 -0.300818223238553
504 374 701.211229946524 656.433155080214 7.11709433796952 -8.75666456394023 0.34713945251865 -0.427110221990244
505 679 701.066273932253 804.888070692194 0.547183098986053 11.8951051862233 0.026689099847406 0.580189063950974
506 597 704.179229480737 241.92797319933 -10.828440929449 -32.9578790615616 -0.528162038800777 -1.60753525951862
507 1890 714.933333333333 101.65873015873 32.2718017931614 12.9711079816604 1.57407153457299 0.632671580492004
508 391 705.677749360614 522.608695652174 7.69818325128598 7.3563460364059 0.375482323591353 0.358809060882034
509 108 699.101851851852 611.740740740741 3.54362270179172 3.75700626367913 0.172841778711561 0.183249657170457
510 1269 708.583924349882 761.963750985028 6.93954236231334 -1.75604829036012 0.338479275668939 -0.0856520390434839
511 82 697.682926829268 974.487804878049 17.7875566010564 0.877786572971436 0.867596011365623 0.0428144318312437
512 911 709.511525795829 870.715697036224 5.39910875202834 5.05763380469006 0.263343938869649 0.246688345921352
513 606 707.821782178218 433.333333333333 -27.2590149492256 -14.2676904166591 -1.32957061917652 -0.695912967391925
514 392 706.897959183673 301.913265306122 5.31665364963015 78.0248605406195 0.259322154452493 3.80569739344527
515 906 714.931567328918 209.331125827815 -4.20382528588749 -40.4385948532271 -0.205043454383011 -1.97241051071661
516 153 703.137254901961 24.8562091503268 -3.10702527998601 5.1657578434423 -0.151546544620295 0.251962144164593
517 1075 723.512558139535 322.415813953488 5.90297688612041 6.51616545065578 0.287920331973947 0.317828877860137
518 893 720.888017917133 171.657334826428 37.2599673259174 12.6135095366693 1.81737153452878 0.615229556750172
519 842 713.420427553444 267.504750593824 8.09899514153782 -10.0007202344565 0.395032102410876 -0.487789592511127
520 1360 719.144117647059 487.854411764706 8.301413579084 8.5570822514284 0.404905152036562 0.417375505628802
521 469 708.46908315565 722.701492537313 63.7387728166876 5.40396942093269 3.10888708918085 0.263581020164655
522 343 710.236151603499 353.69387755102 -5.0955776939137 10.1009304042394 -0.24853907605166 0.492677388263625
523 649 715.366718027735 388.109399075501 -11.9368089608452 -29.5184308436482 -0.582223184169528 -1.43977463774874
524 557 715.368043087971 604.32854578097 7.87231414103247 -21.9412046461112 0.383975635449072 -1.07019204843415
525 648 721.850308641975 820.688271604938 4.15463185030587 -7.4160186736762 0.202644022608697 -0.361719620395324
526 1023 717.25219941349 976.090909090909 7.38058582165366 13.3962177105786 0.359991367225113 0.653406497236009
527 802 726.360349127182 286.43391521197 24.5473262597182 -11.8567355707206 1.19730679318582 -0.578317568831415
528 720 722.879166666667 841.704166666667 19.446998962374 14.6530536849263 0.948536053107208 0.714709232779805
529 643 729.110419906687 12.3297045101089 44.2834104744466 50.512067877431 2.15994310848825 2.46374865301545
530 815 726.500613496932 532.874846625767 -4.1253797466052 -19.4046338890753 -0.201217238196202 -0.946469677750572
531 324 719.12037037037 554.157407407407 3.43952250038199 3.13063609725554 0.167764244930442 0.152698172769544
532 422 719.601895734597 55.0568720379147 -33.3181874087274 0.709029785718527 -1.62510945994839 0.0345832442209787
533 314 718.343949044586 31.4044585987261 -8.14310722912361 -8.15614795378845 -0.397183689169013 -0.397819756334295
534 1038 731.625240847784 432.784200385356 -6.18996433446014 -16.1076230943265 -0.301918272842158 -0.785656504861857
535 1356 731.711651917404 947.311946902655 2.44747121707716 -20.6539941579187 0.119376500859157 -1.00740778242217
536 525 721.241904761905 795.792380952381 0.982975476302127 -4.75822492778621 0.047945067534419 -0.232084544331548
537 369 722.208672086721 653.983739837398 -5.21321419496727 -8.34572936606845 -0.254276848888826 -0.407066674323775
538 415 727.70843373494 733.180722891566 29.0456717315929 31.5645859939035 1.41671560107747 1.53957676835117
539 956 732.476987447699 244.416317991632 -6.51424261208667 4.06501061543211 -0.317735090550813 0.198272706881976
540 868 731.756912442396 353.76267281106 37.1794237231006 -45.5609986293912 1.81344298435676 -2.22225804090185
541 911 733.623490669594 618.441273326015 -0.981967544724221 -12.2250453949586 -0.0478959052218915 -0.59628204487624
542 62 725.354838709677 157.145161290323 9.44628013657793 0.8302401621851 0.46074652930412 0.0404953344263462
543 661 734.953101361573 865.618759455371 8.33533652915759 -13.905657239884 0.40655975906538 -0.678254637628215
544 632 736.063291139241 699.262658227848 7.4369451683362 -0.747101782724501 0.362740319511345 -0.0364402228655412
545 515 739.92427184466 718.345631067961 19.1406732563521 1.24139073342395 0.933594880090362 0.0605493870249102
546 648 732.25462962963 760 14.7227375844348 -16.1377954785083 0.718108096076543 -0.787128176365521
547 824 736.405339805825 671.478155339806 13.7468792150946 -5.95250740364724 0.670510168610383 -0.29033620507057
548 1659 743.152501506932 1000.15792646172 7.83986170707343 -38.2275992217856 0.382392753499996 -1.86456821208007
549 871 740.645235361653 408.083811710677 16.181642922147 5.10599208130484 0.789266854997035 0.249047042444348
550 786 737.516539440204 46.2748091603053 -33.5881835408323 6.19719274325822 -1.63827864178444 0.302270841707146
551 782 737.942455242967 895.042199488491 11.1099201243924 -10.7414513269366 0.541891312151388 -0.523919082116918
552 952 745.644957983193 460.653361344538 -2.61942905136486 -17.6728599851874 -0.127763820967092 -0.862001632740334
553 651 738.937019969278 78.4470046082949 18.6705276652543 -22.6887540662411 0.91066331907015 -1.10665410501391
554 266 734.011278195489 194.665413533835 -4.04573887530827 -11.541435072809 -0.197332719156932 -0.562938646334916
555 726 741.685950413223 380.812672176309 71.2107221754627 -3.79680561523468 3.47333475370236 -0.185190888304051
556 346 738.742774566474 592.011560693642 24.1485878198942 26.6166321180383 1.17785814783625 1.2982381099057
557 1095 753.458447488585 210.382648401826 -20.204897182634 10.7185135591626 -0.985502877031726 0.522800282257179
558 877 746.857468643101 156.469783352338 43.8665163156551 20.6440067929408 2.13960890984359 1.00692064423826
559 1393 758.273510409189 925.685570710696 8.85540481434832 -25.4590525466711 0.431926321769245 -1.24177664971297
560 768 744.815104166667 492.826822916667 -43.4555514183814 -26.9138737217389 -2.11956391357554 -1.31273620177782
561 1115 746.465470852018 565.756950672646 4.46523041164942 -10.7436204013233 0.217793606050729 -0.524024879688134
562 438 744.940639269406 640.223744292237 12.3108977261551 -26.4528824561541 0.600469530644132 -1.29025114706985
563 1334 751.934782608696 105.28035982009 19.2344094547833 -31.7207906764782 0.938166905001003 -1.54719572145406
564 613 742.797716150082 794.978792822186 5.41646989274389 1.24788231629985 0.2641907362559 0.0608660168767164
565 741 752.079622132254 305.564102564103 31.8498333538271 29.7859649506063 1.55348983563032 1.45282373320951
566 555 755.976576576577 136.102702702703 32.1879678190354 12.1108166239667 1.56998249507196 0.590710485593619
567 531 753.248587570621 183.830508474576 25.7646518393838 -12.0003978910694 1.25668239159648 -0.585324762619388
568 397 751.692695214106 519.39798488665 21.7992288240286 -1.67835933821745 1.06326711435175 -0.0818627257320564
569 1078 753.56586270872 754.797773654917 13.5927476779205 -10.939044324753 0.662992334099602 -0.533556768766309
570 1186 760.282462057336 336.677065767285 84.1624451485117 -20.9124662375187 4.10506082174829 -1.0200148734544
571 949 753.279241306639 844.003161222339 -0.401213428899533 -32.1397720934191 -0.0195693640462618 -1.56763172704645
572 1062 760.473634651601 278.409604519774 68.7879724948043 28.0954062625398 3.35516405681464 1.3703659787443
573 463 756.58747300216 812.036717062635 6.23976910751734 -38.4769047341436 0.304347522874669 -1.87672819970425
574 1440 760.179861111111 42.5611111111111 -6.7909040327645 12.8503104096712 -0.331229374811563 0.626779625009246
575 1091 772.758020164986 227.061411549038 -0.612592453891624 36.4570771934905 -0.0298794703235119 1.77821021000954
576 347 755.613832853026 535.256484149856 -19.784915649343 -41.5068570851645 -0.965018090318027 -2.02451547781852
577 438 757.123287671233 249.769406392694 25.8063722538174 7.05669463425311 1.25871732342928 0.344193430014979
578 357 760.212885154062 651.411764705882 -10.3445686323309 -10.5510302798087 -0.504560951568539 -0.514631210563025
579 738 762.50135501355 675.065040650407 12.5951256672607 -12.5852744651965 0.614332875315498 -0.61385237853847
580 993 765.530715005035 963.7583081571 12.2356967553751 -13.2671341921056 0.596801569733993 -0.647110391015691
581 10141 833.764717483483 36.0043388226013 0.587049329172379 -3.67967599489622 0.0286335930160623 -0.179477838799973
582 673 759.280832095097 605.206537890045 6.66022725866994 23.954862635198 0.32485555683727 1.1684091154979
583 369 756.509485094851 883.506775067751 -7.48324747125233 17.6395639137682 -0.364998734999658 0.860377601997644
584 1176 768.269557823129 377.823979591837 68.547177854574 -24.2760408097289 3.34341919077668 -1.18407472429457
585 772 764.613989637306 720.363989637306 11.304471466998 -58.9263872249658 0.551380640710455 -2.87416083429527
586 634 771.719242902208 635.496845425867 7.67190302981558 -0.931655684505641 0.374200494060917 -0.0454419217867843
587 524 768.015267175572 779.345419847328 -2.67172290846913 -14.6748541091964 -0.130314477184815 -0.715772558202574
588 1325 774.329056603774 416.461886792453 38.2026949519437 -71.9432098706027 1.86335349520437 -3.50906216792406
589 814 774.695331695332 899.679361179361 -0.939083032848842 6.26257701747863 -0.0458041940168668 0.30545998886164
590 841 780.475624256837 492.039239001189 22.5643251442813 -5.72187392180395 1.10058502881575 -0.279086954067612
591 700 776.761428571429 703.451428571429 10.9314022778778 -34.6732950041939 0.533184024519511 -1.69120543766846
592 567 771.671957671958 510.373897707231 12.8657073325292 -12.9982902272134 0.627530616792915 -0.633997406649622
593 643 772.471228615863 550.102643856921 47.4603898954906 -41.6555961059567 2.31490169755746 -2.03177028993623
594 62 764.790322580645 1019.74193548387 7.48836064865919 5.42177737145911 0.365248132509563 0.264449610898832
595 1018 772.380157170923 460.693516699411 10.5905647409129 5.54560067458518 0.516559521546637 0.270489147768101
596 414 771.920289855072 825.342995169082 -2.10974577498708 -31.3989817546495 -0.102903791702653 -1.53149934767645
597 243 768.41975308642 574.115226337449 7.67710940189226 5.11787216687504 0.374454437182433 0.249626498919824
598 1140 777.379824561404 862.70350877193 17.7348425459964 32.7074484558079 0.865024859805086 1.59532039496197
599 821 774.112058465286 998.37149817296 23.0253570676245 -30.3452797563712 1.12307206662403 -1.48010456246914
600 425 774.174117647059 795.955294117647 -17.7217292697331 -10.1065415124494 -0.864385253903211 -0.492951072570665
601 237 769.936708860759 98.7721518987342 -7.33635777752302 0.831578371858998 -0.357834124634753 0.0405606062004006
602 770 780.231168831169 157.035064935065 37.2840024145542 -23.8320016864697 1.81854385670331 -1.16241651789386
603 863 781.639629200463 187.63731170336 6.6848419939145 18.674258189782 0.326056151533774 0.910845277068828
604 852 784.042253521127 126.43544600939 -14.3854519928001 -2.90151786316423 -0.701656840822296 -0.141522828651907
605 1289 784.829325058185 612.265321955004 4.88691830531289 2.60460900058603 0.238361621253102 0.12704096637653
606 266 777.766917293233 662.06015037594 6.51261709973104 0.208893970305741 0.317655805460241 0.0101888966259045
607 331 780.29003021148 91.6465256797583 25.8658772820744 20.8903118279188 1.26161970773814 1.0189342822392
608 803 785.383561643836 761.153175591532 -12.0068146328759 15.4911134958673 -0.585637742064633 0.755585974063937
609 650 782.192307692308 310.003076923077 1.01854127755098 -5.92057330559379 0.0496798053624741 -0.28877860518661
610 353 782.869688385269 533.413597733711 -37.6684074083831 -3.64208269250009 -1.83729338182781 -0.177644208698635
611 797 790.582183186951 573.456712672522 -5.01898116562291 -26.527269738983 -0.24480304620113 -1.29387941998705
612 473 790.551797040169 1011.9577167019 15.652234000438 17.8251817814688 0.763444698578494 0.869431196331428
613 1301 789.130668716372 262.723289777095 72.1770352098065 -46.9130114637228 3.52046710319422 -2.28820307026646
614 116 782.491379310345 813.396551724138 19.5477644933182 21.1350652294063 0.95345093684819 1.03087223862417
615 1292 795.201238390093 945.109133126935 46.7359316542586 -21.3338985873521 2.27956592353348 -1.04057042439241
616 627 787.491228070175 365.661881977671 -6.89582204201146 -5.1047324938324 -0.336346797534911 -0.248985605503257
617 774 793.117571059431 440.478036175711 -11.52410421488 -43.674377453616 -0.562093326005094 -2.13023725110078
618 310 784.090322580645 735.390322580645 -11.1063689447214 -40.1355591076006 -0.541718101778131 -1.95762980698628
619 1184 797.489864864865 688.503378378378 -11.3513109138887 -27.6951309539703 -0.553665255635844 -1.35084237193579
620 794 795.363979848867 335.311083123426 30.0779369908432 -9.81631283984045 1.46706479977201 -0.478795039542245
621 846 802.152482269504 299.209219858156 9.51053751733959 22.1389668133184 0.463880711727259 1.07983798639607
622 235 790.753191489362 654.289361702128 -0.724160429930519 -15.3377404225611 -0.0353212481448531 -0.748105133966798
623 733 796.43929058663 797.159618008186 -13.481684643659 -16.8986910595589 -0.657575185038796 -0.824241197900248
624 1034 799.864603481625 831.095744680851 -2.42149718077783 14.0040371963594 -0.118109605647084 0.683053163909855
625 803 799.353673723537 982.681195516812 28.0020770182409 -15.7327202271974 1.36581380320307 -0.767370450207708
626 927 801.652642934196 102.803667745415 11.9781335302103 35.6624666622385 0.584238808482449 1.73945272673258
627 1292 803.585139318885 905.760061919505 -1.6946037476069 0.561787751015706 -0.0826550540495071 0.0274014482678494
628 350 801.274285714286 749.14 11.0891615228972 4.25615646950278 0.540878802099403 0.207595931217967
629 307 798.28664495114 521.244299674267 10.0352984632796 0.0612422688884017 0.489476161053389 0.00298711899595039
630 713 807.295932678822 486.618513323983 27.8161658980874 8.85538766573699 1.35674590535003 0.431925485338074
631 781 804.902688860435 544.154929577465 -3.77223261063134 -12.1507805606353 -0.183992329038195 -0.592659744439549
632 347 798.276657060519 233.051873198847 -29.1470364705803 16.2306634341016 -1.42165971145817 0.791657852344268
633 309 805.336569579288 595.058252427184 18.8126064952694 -15.2228114218476 0.917593277410423 -0.74249942066701
634 643 805.56298600311 731.275272161742 10.9806226017248 -11.7155333511586 0.535584767780969 -0.571430367557198
635 362 803.267955801105 856.991712707182 22.4198128719956 -30.4264207562956 1.09353637824275 -1.48406225095168
636 362 808.033149171271 870.168508287293 41.0089490388742 -38.6657427411605 2.00022979065659 -1.88593885777026
637 767 805.67926988266 400.840938722295 25.5809611367158 -15.8751342194847 1.24772279559721 -0.774316756237381
638 915 806.050273224044 162.169398907104 0.369194775993811 6.04828868126592 0.0180076399616478 0.29500797963125
639 940 808.639361702128 207.470212765957 -2.07697195623133 5.02776377831743 -0.101305234066692 0.245231422054769
640 750 809.014666666667 456.550666666667 11.1787532860591 -21.2784097729768 0.545248680330227 -1.03786393270797
641 1062 818.964218455744 643.123352165725 48.3916666541519 -11.7760941310713 2.36032513706709 -0.574384246624229
642 330 806.418181818182 80.2727272727273 8.72286576923071 57.8284773277936 0.425461670694717 2.82060978909051
643 512 813.0546875 136.13671875 10.3299919044207 4.9861831781877 0.50384996515948 0.243203309727042
644 579 808.172711571675 372.948186528497 17.7476967513156 -11.5262209195049 0.865651829406047 -0.562196569217806
645 408 810.154411764706 511.051470588235 -2.09910236749951 1.14903544402321 -0.102384654752556 0.0560447165684947
646 888 816.513513513514 613.109234234234 37.2155892755322 -26.0818385747884 1.81520697531641 -1.27215331616848
647 1108 820.180505415162 677.090252707581 -3.62078619477546 1.35665358637353 -0.176605462518013 0.0661713841165032
648 699 824.243204577969 795.243204577969 19.0199343878898 -16.8186463555463 0.927705787898323 -0.820336981740052
649 906 820.394039735099 1009.23509933775 35.861793971998 -15.1992016917441 1.74917500522097 -0.741347845544772
650 1153 826.002601908066 967.434518647008 3.14092670367456 -12.6724487661516 0.153200101690076 -0.618104343971299
651 812 823.084975369458 237.060344827586 62.202969844216 -105.390554551235 3.03397761380744 -5.1404713314493
652 695 818.502158273381 282.602877697842 11.3599859260971 67.8196795366464 0.554088383227751 3.30793513565515
653 1066 821.305816135084 345.956848030019 -13.2251893383058 -45.186332255825 -0.645064512052647 -2.20398352132677
654 356 812.682584269663 574.952247191011 -42.8525437947915 13.6309255936812 -2.09015194762746 0.664854478978694
655 887 824.048478015784 775.400225479143 -3.34114814060629 8.87706232236199 -0.162965991630325 0.432982676387825
656 587 820.076660988075 716.676320272572 4.9515518970593 -30.7786491770802 0.241514153534916 -1.50124234936634
657 1345 828.971747211896 439.481040892193 72.0011193125586 14.3286968743371 3.51188672679901 0.69888858459085
658 650 825.238461538462 820.349230769231 2.83945449863812 -5.00363765243325 0.138495660349792 -0.244054659497872
659 2127 835.464503996239 174.753643629525 29.2428155748019 23.1465943453388 1.42633138001044 1.12898546894976
660 891 826.094276094276 888.866442199776 10.3433927162441 13.1844082365181 0.504503595736618 0.64307539561335
661 164 818.737804878049 92.4146341463415 6.00635309857288 -14.5818848127511 0.292962552870578 -0.711237939278542
662 432 826.81712962963 261.631944444444 20.3590748926072 -16.5683380408538 0.99302296364139 -0.808128081984482
663 1106 832.920433996383 928.975587703436 14.1553439954139 -33.9998265052215 0.690433220558245 -1.65835671107866
664 1344 837.50818452381 319.316964285714 25.6341778680826 -24.6115742952726 1.25031846541894 -1.20044051979231
665 1345 836.386617100372 854.094423791822 -1.49015470914719 -9.21480850091583 -0.0726829609580563 -0.449456396974602
666 851 831.196239717979 550.734430082256 16.3877017589378 -3.56203781742917 0.799317466720498 -0.173739984194992
667 866 834.911085450346 756.170900692841 3.26814151355245 -14.0551012849367 0.159405060814711 -0.685543837618861
668 1177 835.918436703483 122.412064570943 25.3691825403844 0.897996938935711 1.23739320004957 0.0438002014505405
669 1044 834.345785440613 514.519157088123 -0.680594139506687 6.8013775212197 -0.0331962828868666 0.331740223885026
670 765 833.551633986928 479.054901960784 8.54024275996104 -2.84218445972546 0.416554151917431 -0.138628815420142
671 733 831.263301500682 404.128240109141 57.964094285959 12.0246202360643 2.82722456674753 0.586506218306351
672 1228 840.439739413681 587.078175895766 6.67496180548578 -34.6839883126054 0.325574240933878 -1.6917270085584
673 134 826.880597014925 990.216417910448 11.7076958512057 5.50301585996735 0.571048089999313 0.268412054430561
674 160 829.81875 218.0125 32.0845256458551 -0.662363304051429 1.56493705691138 -0.0323070657515629
675 1094 842.392138939671 373.775137111517 2.97412027837057 -25.8446246329969 0.145064043854268 -1.26058310029485
676 834 842.416067146283 720.369304556355 50.6939767753173 -28.2431104453428 2.47262134069132 -1.37757031617726
677 352 838.940340909091 96.0880681818182 87.7893076376848 -5.28580483703542 4.28196265823725 -0.257817489851118
678 812 847.194581280788 251.746305418719 -33.3626074047891 7.70612386741217 -1.62727606507985 0.375869630686609
679 743 845.872139973082 284.702557200538 57.3674906163477 -6.80170225802881 2.7981249565127 -0.331756063067812
680 976 848.564549180328 621.084016393443 29.22248266474 -47.8330782377429 1.4253396332481 -2.33307973777247
681 452 842.25221238938 665.482300884956 22.2722796608247 24.5150977054276 1.08634038002744 1.19573483106749
682 1529 858.281229561805 212.304120340092 12.8954815280817 -78.8060245960199 0.628982866468479 -3.84379901886173
683 364 844.725274725275 691.917582417582 20.6778154561563 -11.3923868245648 1.00856967687458 -0.555668751510239
684 292 845.13698630137 811.979452054794 -6.21975612015689 -39.9382285954033 -0.303371380484859 -1.94800492319009
685 1187 857.990732940185 995.23251895535 25.1778014903715 -29.6404844386515 1.22805850392653 -1.44572785631454
686 403 853.612903225806 1016.95037220844 0.265973763273704 23.4049092265401 0.0129729890012249 1.14158489255993
687 861 858.706155632985 908.278745644599 27.0383886897218 -2.33707884831804 1.31880947490915 -0.113992063807531
688 390 850.038461538462 885.425641025641 12.7981210333404 -21.8155037223946 0.624234064887875 -1.06406092978264
689 1310 860.441984732824 558.667938931298 -9.61469205254746 -11.0483963499212 -0.46896089566363 -0.538890462595007
690 1156 856.739619377163 958.238754325259 27.8039297691658 19.9053062936346 1.35614908270119 0.970890197720737
691 1116 860.931899641577 441.913978494624 68.8505758822535 -21.3575033803864 3.35821756497583 -1.0417217587069
692 1325 864.234716981132 409.018113207547 58.0682573438395 19.4016566657081 2.83230516638107 0.946324462352178
693 1392 880.340517241379 522.046695402299 -0.743765505368504 -14.1211985583509 -0.0362774944486039 -0.688767761627226
694 323 857.532507739938 736.33746130031 0.130814958778711 -18.3466045356044 0.00638055799393084 -0.894863823862548
695 92 850.20652173913 109.54347826087 -1.5731359220015 -46.2674258278347 -0.0767304066475001 -2.25671434276702
696 340 856.605882352941 491.538235294118 29.9921776585331 -0.981823549812691 1.4628818500663 -0.0478888818058202
697 840 861.795238095238 649.334523809524 35.0381138866032 -11.6772994804392 1.70899964146768 -0.569565493450025
698 1045 863.826794258373 840.021052631579 19.9964962497903 -1.24149197336038 0.975338028528064 -0.0605543250479908
699 1192 867.759228187919 347.311241610738 -0.927993558129105 -39.5204198381646 -0.0452632999384518 -1.92762611459801
700 628 863.277070063694 471.238853503185 36.7780383892873 11.6793084094845 1.79386523557161 0.569663479860742
701 959 869.47653806048 751.086548488008 -4.91678986419231 -38.0515468269219 -0.239818619868387 -1.85598117795274
702 1249 866.813450760608 783.821457165733 15.7273991800888 -27.0358897345972 0.767110913760335 -1.31868758725773
703 572 860.473776223776 147.312937062937 10.1417647551807 -26.6933630521897 0.494669101954154 -1.30198069546207
704 1190 866.26974789916 95.409243697479 100.667175254746 -19.1389292622269 4.91008639833504 -0.933509815998599
705 607 861.242174629324 683.505766062603 23.7062365289758 -7.42084177870212 1.1562822662112 -0.361954869495396
706 688 869.361918604651 811.370639534884 13.5949615725968 11.1622279991735 0.663100317800444 0.544442652087555
707 89 856.157303370787 930.76404494382 3.06802117436785 -3.31786212732537 0.149644101962196 -0.161830205940573
708 357 863.473389355742 507.358543417367 12.2426729579453 -24.4328241697643 0.597141837127665 -1.19172190264885
709 1048 868.850190839695 306.240458015267 15.2106402437454 14.8514053743165 0.74190576602338 0.724383924949294
710 775 871.149677419355 712.821935483871 78.816606303785 -6.94504238765397 3.84431514638033 -0.338747541859454
711 525 875.870476190476 274.714285714286 87.8032668798112 -19.6309856049367 4.28264352650163 -0.957510083706918
712 631 871.244057052298 876.589540412044 13.3603464254132 -14.3996554576307 0.651656859293596 -0.702349621158068
713 614 873.897394136808 168.587947882736 19.8359412093067 -89.1205026239634 0.967506884776709 -4.34689228777258
714 953 875.307450157398 251.171038824764 17.6357174095798 -40.1751898945948 0.860189987039257 -1.95956281630816
715 296 869.030405405405 377.766891891892 -2.43315331535894 14.4847937498624 -0.118678138813123 0.706502279356792
716 724 876.386740331492 591.835635359116 -15.7198879430618 -30.7628679198756 -0.766744549822262 -1.50047261150339
717 36179 955.362060864037 895.150971558086 0.975937979953394 -2.90831531312019 0.0476018105093479 -0.141854377307043
718 187 869.855614973262 616.459893048128 -1.74309314219311 -2.59101598484206 -0.0850201459100737 -0.12637796096739
719 300 877.963333333333 186.65 17.5030684097462 -30.0449821175754 0.853719972874382 -1.46545741112142
720 481 878.898128898129 137.446985446985 17.6794685842183 -5.26479164782833 0.862323970107322 -0.256792562169873
721 399 881.854636591479 546.84962406015 15.8515359369046 7.16614886791041 0.773165739473203 0.349532109108347
722 1023 883.856304985337 640.940371456501 23.1352935282462 -6.67257764286136 1.12843426655279 -0.325457952337879
723 570 883.524561403509 115.142105263158 -24.1779350262982 -37.719509465094 -1.17928957092554 -1.83978590744947
724 1001 885.616383616384 488.071928071928 13.0152340032525 1.6855135704289 0.634823846887519 0.0822116766009278
725 857 886.576429404901 684.248541423571 8.21446216460759 2.66888045537048 0.400664057991197 0.130175835266412
726 505 886.449504950495 894.423762376238 -10.7616800769 -20.2277226569441 -0.524905748423973 -0.986616199727648
727 780 890.697435897436 370.338461538462 2.19208515074719 -4.12589125262679 0.106919931501391 -0.201242187130678
728 418 885.27033492823 847.133971291866 -22.7341398946953 2.0933713036699 -1.10886781905134 0.102105119556634
729 1595 895.324137931034 221.82946708464 27.6774326230058 -61.0096122070259 1.34997912794467 -2.97577106248733
730 239 885.154811715481 323.707112970711 -15.1070562213395 -19.7156103450693 -0.73685340910353 -0.961637693172827
731 755 893.184105960265 396.980132450331 18.8797089617444 -14.1468792567289 0.92086623015892 -0.690020349151278
732 1039 896.273339749759 454.813282001925 26.7400686551697 -61.3224727894655 1.30425878209098 -2.9910309770178
733 210 887.642857142857 49.0714285714286 -16.0901062893718 2.15055479292133 -0.784802114882874 0.104894269764458
734 743 895.92866756393 603.993270524899 11.5006803107819 -18.7927095472241 0.560950814629195 -0.916622794889995
735 916 901.197598253275 565.198689956332 -0.472540677822556 -3.61111297091717 -0.0230483824440794 -0.176133646707403
736 937 896.866595517609 735.554962646745 6.53990392077647 -3.4538949444502 0.318986732334169 -0.168465267303937
737 455 891.175824175824 82.3494505494506 11.6548716923752 -71.6509587830329 0.568471568078231 -3.49480749070337
738 1197 898.707602339181 161.121971595656 47.760292901794 5.02204686589388 2.32952960052925 0.244952577099993
739 475 897.04 309.827368421053 -6.21586029148975 19.6821136754519 -0.303181359703006 0.960003878163495
740 616 900.935064935065 427.298701298701 16.9015217934699 -1.54772082386187 0.824379268210047 -0.0754907738936064
741 274 891.832116788321 287.744525547445 -18.8729683134373 12.7516639928384 -0.920537452029559 0.621968102004758
742 97 886.731958762887 759.876288659794 5.21418059141574 -3.87310217522111 0.254323985306879 -0.188912287066667
743 804 898.088308457711 788.095771144279 -2.14910760578595 8.60749762140575 -0.104823682566085 0.419834537798587
744 598 899.969899665552 343.66220735786 11.1411190493573 5.63961943909221 0.543413053639861 0.275074954965194
745 828 905.324879227053 49.8393719806763 6.2894879465742 21.391599388083 0.306772581437962 1.04338480669851
746 803 905.616438356164 117.124533001245 -12.2814942455802 35.4506597613843 -0.599035362757043 1.7291217506192
747 297 901.478114478114 537.447811447811 14.1686833735223 4.00586032906564 0.691083854678518 0.195387625267133
748 116 897.474137931035 711.293103448276 -12.1218774509889 -11.1540244233478 -0.591249982367799 -0.5440425190156
749 858 906.7668997669 263.804195804196 115.087930237253 10.5411740540617 5.61346515823517 0.514150468753622
750 68 896.838235294118 325.102941176471 -8.16662393365963 -13.6056107289464 -0.398330726927684 -0.663619735153855
751 1088 908.628676470588 638.513786764706 17.564705464187 -32.2810780584564 0.856726347711837 -1.57452398855253
752 483 907.349896480331 696.817805383023 1.47796626265228 -19.6550918153238 0.0720884640408632 -0.958685874876558
753 533 908.065666041276 771.227016885553 10.6449567158011 -13.2278110404475 0.51921251439561 -0.645192386744607
754 234 905.311965811966 667.705128205128 -1.13928329270819 -1.30905162272414 -0.0555690510359595 -0.0638495770959181
755 702 911.378917378917 84.7720797720798 47.1445587681745 23.5453833852316 2.29949689337496 1.14843658234027
756 409 909.332518337408 493.178484107579 13.428711161554 -1.96162822009126 0.654991379808365 -0.0956792918613872
757 903 914.168327796235 201.744186046512 9.15512489808804 -13.0922289520647 0.446545302611352 -0.638579309876787
758 24905 972.895362377033 232.120658502309 0.352816007874092 -3.67346132687451 0.0172087582371671 -0.17917471559376
759 555 910.92972972973 400.702702702703 -8.84219906724292 8.35542717628353 -0.431282205560779 0.407539689344909
760 430 916.006976744186 717.855813953488 10.320583320213 -3.20551927893692 0.503391057265934 -0.156350633374575
761 546 920.159340659341 585.349816849817 5.25974290220133 -3.98678076434759 0.256546307348785 -0.19445701098327
762 1214 926.686161449753 678.636738056013 4.6510609641799 -3.96289145402812 0.226857574182009 -0.193291799211226
763 915 924.863387978142 334.268852459016 14.1700155022443 -47.8030304243332 0.69114882985143 -2.33161414226381
764 797 924.993726474279 436.740276035132 3.21729177225117 -20.9019550754246 0.156924841989752 -1.01950218683239
765 652 922.78527607362 470.700920245399 8.56140616523064 -17.9086779401152 0.417586406454162 -0.873503758731692
766 1029 919.89990281827 531.261418853256 5.67937485489465 5.10159744906756 0.277014043112823 0.248832692295758
767 206 916.242718446602 734.461165048544 -1.74470634668804 -0.638987543005402 -0.0850988306792477 -0.0311669025745156
768 853 925.731535756155 361.51817116061 10.9070715985819 -2.50288198307966 0.53199728477867 -0.122079185699391
769 807 926.866171003717 610.790582403965 12.0045287044291 20.7157642282133 0.585526244884486 1.01042064516726
770 473 926.522198731501 24.6786469344609 5.82263803338155 7.87619958630647 0.284001768578355 0.38416514977629
771 768 929.928385416667 60.7630208333333 -0.239160350545384 -4.86379482609443 -0.0116651528292344 -0.237233763234781
772 562 929.717081850534 387.494661921708 4.0375168277137 -4.42754773127991 0.196931685116209 -0.215955616498852
773 452 922.856194690266 768.263274336283 1.53854578059734 4.49669709297346 0.0750432570637826 0.219328407475115
774 909 930.182618261826 105.86798679868 -44.2236876670278 3.7140335193293 -2.15703010190358 0.181153642387114
775 915 942.715846994535 752.890710382514 9.25334180884768 1.89598519123703 0.451335876265446 0.0924775238341529
776 153 929.287581699346 5.16339869281046 28.2715820339234 10.97573828434 1.37895903061645 0.535346533020773
777 834 937.966426858513 565.780575539568 14.7470923378815 -14.4227840562158 0.719296010044835 -0.70347772887578
778 825 944.033939393939 720.168484848485 8.36447551320231 4.401528463475 0.407981026016173 0.214686515099908
779 872 941.212155963303 419.23623853211 -4.44418390129894 8.66944922269735 -0.216767053115844 0.422856254799061
780 362 939.361878453039 487.767955801105 21.7282440845583 -14.2006410566897 1.05980480200535 -0.692642604936936
781 557 935.342908438061 642.626570915619 -18.6967486826658 14.4103420650771 -0.91194226089619 0.702870865205435
782 486 939.759259259259 39.5185185185185 57.3969770002571 17.9741720533242 2.79956316804693 0.876698263331871
783 537 935.877094972067 525.199255121043 -22.0986620645991 18.2651752043135 -1.07787210429027 0.890892071888924
784 256 934.38671875 734.1015625 -7.45181558432581 4.49380843716728 -0.363465630687539 0.219187511999032
785 1267 954.381215469613 510.116022099447 7.23316224816695 2.68469668207396 0.352800716636783 0.130947278782267
786 541 948.264325323475 120.404805914972 8.03005901979916 4.2974625044296 0.391669712308577 0.20961065150539
787 608 942.292763157895 462.427631578947 6.97891530752579 -18.2262677565051 0.340399708642854 -0.888994343758633
788 361 943.17728531856 77.6481994459834 -3.92488230755011 30.3681716640689 -0.191437886129214 1.48122112548319
789 513 946.083820662768 594.818713450292 5.29954515749676 -26.8800456204059 0.258487680113587 -1.31108622103865
790 983 956.192268565615 15.2278738555443 11.3541290581946 -50.3332783805489 0.553802711882033 -2.45502811551567
791 901 950.899001109878 668.634850166482 3.98225382157136 15.0637200225816 0.194236207329096 0.734739666669233
792 652 953.553680981595 369.283742331288 -4.71920384724338 -4.61369864615266 -0.230181273713923 -0.225035210446346
793 658 955.075987841945 398.462006079027 14.9780237764193 -15.144090337009 0.730559794018537 -0.738659764622723
794 735 957.002721088435 621.05306122449 57.9605102218383 0.739522903033613 2.82704975242057 0.0360705596263505
795 1306 967.21056661562 707.049770290965 1.68081991980605 7.27444368940611 0.0819827416971375 0.354814237356115
796 1009 967.397423191278 93.191278493558 25.9362917643325 5.41110920739322 1.26505420553453 0.263929266435579
797 1348 965.776706231454 545.446587537092 36.1299504461834 -2.0223422557082 1.76225445692101 -0.0986406460437848
798 770 967.354545454545 69.4077922077922 -1.96668701528735 4.26404313770885 -0.0959260368546925 0.207980606979344
799 1207 968.026512013256 461.777133388567 2.9500173076222 11.9640723084197 0.143888410699453 0.583552966114434
800 1024 972.458984375 648.861328125 -10.5820105669565 2.94338095718645 -0.516142287894399 0.143564719745309
801 952 970.78781512605 42.6039915966387 78.0817702312043 -62.6217019961251 3.80847318900093 -3.05440146138667
802 745 967.308724832215 586.893959731544 5.7696229420136 6.71317433268081 0.281415933837551 0.327438074001128
803 419 970.353221957041 489.930787589499 -1.1924797346891 -5.95839226334279 -0.0581637312338422 -0.290623241728489
804 732 972.431693989071 430.717213114754 6.17729716234716 -7.79105328890167 0.3013004258693 -0.380012101121672
805 1089 984.04958677686 402.720844811754 15.7321761680645 -4.73832233919143 0.767343913480699 -0.231113786690802
806 777 980.71685971686 679.785070785071 26.8067942083876 3.08421716556205 1.30751335072715 0.150434068660566
807 708 981.854519774011 373.796610169492 10.8987799913053 -18.7087894910069 0.531592857933416 -0.912529556696544
808 430 984.588372093023 8.79302325581395 26.3919160771452 -5.2972785727699 1.2872774847259 -0.258377126432013
809 1274 994.766091051805 607.993720565149 66.1270811222953 -47.2265201312497 3.22537789263013 -2.30349459543629
810 374 986.24064171123 499.200534759358 9.92281284995851 -12.5399659236256 0.483989625064089 -0.611642434203258
811 1124 994.178825622776 552.581850533808 -10.9994498451378 4.45226400786503 -0.536503074980575 0.217161163919558
812 843 996.517200474496 635.812574139976 36.3821828528133 -11.2301424726588 1.7745572051195 -0.547755210840356
813 201 986.537313432836 581.427860696517 10.6283511444166 14.4367810887502 0.518402570240675 0.704160440384177
814 558 995.740143369176 517.220430107527 0.548930984256782 -15.149716135147 0.0267743537315241 -0.738934165437559
815 963 998.714434060228 52.7819314641745 31.4837389602627 -7.003818605351 1.53563341820529 -0.341614378108008
816 733 996.809004092769 440.405184174625 -2.74619138716451 -0.31279990697485 -0.133946710466633 -0.0152569550576047
817 934 1000.27944325482 477.690578158458 -5.67834833172309 -3.98776182086547 -0.276963973987018 -0.194504862452751
818 1173 1009.26342710997 26.3128729752771 16.897767080272 -18.4215142282319 0.824196130398181 -0.898517577550809
819 1086 1003.83701657459 707.548802946593 -5.70161239023212 -20.3547982995928 -0.278098688822973 -0.992814370908573
820 803 1008.91158156912 581.997509339975 -62.0759318185476 -4.09725566271199 -3.02778127741152 -0.199845473453224
821 693 1010.05627705628 658.190476190476 -10.980282226563 -7.5496175589701 -0.535568165830554 -0.36823596564743
822 699 1009.99427753934 87.20886981402 30.0303231566007 -14.2337343727227 1.46474241375795 -0.694256746195181
823 524 1006.25190839695 740.541984732824 15.1261383202993 -8.41701336715459 0.737784146996164 -0.410543583289048
824 673 1009.33283803863 379.713224368499 24.7243573371713 0.600093425662701 1.20594156299321 0.0292698246436372
825 574 1011.99477351916 421.897212543554 -5.73679175780512 0.705153551144794 -0.279814578176033 0.0343941791497768
826 367 1013.34877384196 681.149863760218 -30.6783992612183 -10.230822416116 -1.4963526149811 -0.499012929110516
827 87 1004.74712643678 4.11494252873563 20.4670604653031 -1.2559235314477 0.998290008140941 -0.0612582307341492
828 75 1004.10666666667 681.826666666667 -4.36882195385195 10.3964213704965 -0.213091240496933 0.507090092013167
829 213 1013.31924882629 401.352112676056 11.0780220706955 -3.62160105177179 0.540335470347005 -0.176645207531659
830 148 1011.37162162162 68.9797297297297 4.83961234664137 -18.0701121508067 0.236054252007412 -0.881377784402287
831 540 1016.37407407407 461.674074074074 -2.44951641058177 -6.95711336481238 -0.119476256085064 -0.339336309157336
832 448 1014.5625 507.133928571429 2.75314315983552 -5.65367271892571 0.134285786281067 -0.275760409960706
833 557 1016.07360861759 543.29802513465 1.13965767198349 3.02097961512092 0.0555873115521886 0.147349628916436
834 198 1018.86868686869 623.959595959596 3.44560829174258 11.7075706865365 0.168061082119994 0.571041985036716
835 174 1019.41954022989 723.126436781609 -11.0001669248215 11.763780553445 -0.53653805086216 0.573783646380258
836 144 1019.54861111111 365.659722222222 -4.09866928093177 4.62756058885317 -0.199914423312757 0.225711332887808
1 495 14.9616161616162 9.17777777777778 -16.7007676122157 1.46314029549417 -0.516721731007345 0.0452695590854965
2 170 4.36470588235294 26.4588235294118 -2.93990885991429 -14.550195698311 -0.090960776796127 -0.450183038426781
3 871 21.5281285878301 36.9357060849598 20.8470213181593 15.1175048567685 0.64500681597336 0.467735583146946
4 1013 13.6929911154985 68.4096742349457 -5.18486459314268 -15.4249305420414 -0.160419704639668 -0.477247333501112
5 1003 18.1535393818544 113.237288135593 -22.6372306177822 20.9092604191825 -0.700395889676175 0.646932493688528
6 128 4.390625 131.34375 -0.915319409038267 -6.65124696574028 -0.0283199814789905 -0.205789573587073
7 338 8.92603550295858 152.251479289941 -21.6931171143738 48.2552827494502 -0.671185018949983 1.49301839361602
8 65283 104.870869904876 312.499946387268 -24.0405739902761 8.59664880957982 -0.743815332031768 0.265980304432185
9 446 7.08744394618834 502.526905829596 -24.873673265348 23.2457641474234 -0.769591422658957 0.719223916394075
10 288 10.1180555555556 526.684027777778 -48.583931249499 -27.0090063560713 -1.50318677783531 -0.835658626067544
11 529 12.0718336483932 551.17202268431 -46.2397107163843 20.1298120789524 -1.43065659719572 0.622816362924581
12 314 5.73248407643312 574.429936305732 -17.3123580147308 -9.99673744161159 -0.5356443373685 -0.309299045121565
13 477799 539.295431761054 744.845156645368 -14.7822319571398 9.99953210289235 -0.457362240012152 0.309385511938426
14 547 24.4753199268739 143.989031078611 -30.0615278525165 -11.2175070512682 -0.930103637710399 -0.347069655461746
15 215 16.9627906976744 84.1255813953488 -9.99549989725687 -3.07364475643682 -0.309260755500631 -0.0950985652830704
16 1191 31.4785894206549 577.910999160369 26.4055023951868 -34.9536762502768 0.816986214201282 -1.08146670359645
17 926 32.511879049676 537.177105831533 -2.34869505603621 -33.9369679192073 -0.0726686223737238 -1.05000974898464
18 394 26.8883248730964 510.944162436548 60.5189447387139 37.9579631317455 1.87245608167452 1.17441933630656
19 1229 47.7632221318145 105.631407648495 59.2335322784639 20.2862603009215 1.83268542161019 0.627656870735119
20 589 41.8505942275042 498.947368421053 31.4730158724547 -73.5278855532814 0.97377507544869 -2.27495269574383
21 478 42.1757322175732 79.6359832635983 3.41003466764666 -9.81082369555326 0.105506468754921 -0.303546874029078
22 373 41.627345844504 132.099195710456 16.7099122337906 -1.271165560419 0.517004665588514 -0.0393298609996934
23 1020 46.421568627451 15.2088235294118 -17.7390245936619 -1.76680387906195 -0.548845400837403 -0.0546649100171666
24 641 46.1638065522621 56.1482059282371 -18.8511586440707 32.2594876408485 -0.583254827097493 0.99810851107207
25 636 58.4874213836478 520.564465408805 9.47114545887046 -51.562324735825 0.293037229770818 -1.59533826892904
26 227 51.7577092511013 542.052863436123 -8.70317116995914 -31.3564115793174 -0.269276106141678 -0.970167338751085
27 804 62.6641791044776 559.148009950249 -2.14293458187202 -34.2855882849424 -0.0663023935361197 -1.06079606270566
28 570 62.7087719298246 35.240350877193 11.3265745100192 -15.7625360587945 0.350444202511976 -0.487692847807095
29 349 60.3209169054441 144.19770773639 -49.5060694533282 -41.1176753276145 -1.53171773281742 -1.27218082806819
30 685 68.4802919708029 587.173722627737 56.6885508464672 -9.55579810586554 1.75394369898655 -0.295656382572972
31 924 74.0541125541125 78.5541125541125 32.9758680617894 7.01994368917525 1.02027332048464 0.21719704979258
32 993 80.5931520644512 108.765357502518 60.5709467884579 28.5115971156088 1.8740650250347 0.88214878246586
33 541 76.7874306839187 608.03696857671 45.135709973318 -52.25112298404 1.39649881545559 -1.6166496859487
34 723 80.6583679114799 52.0663900414938 -2.19696430843819 -39.1459159768026 -0.0679740732148853 -1.2111745959872
35 645 83.031007751938 136.429457364341 47.0804906583733 3.83983046514182 1.45667032764862 0.118804350242652
36 756 80.4298941798942 15.1111111111111 46.2767373662278 -6.56416314409172 1.43180220169994 -0.203095200243894
37 783 90.058748403576 504.773946360153 104.334838296887 -74.1189065942825 3.2281197787403 -2.29323888608304
38 761 83.0354796320631 541.813403416557 2.11040437128967 -14.3044080338929 0.0652959088575442 -0.442578368368056
39 811 90.7940813810111 474.588162762022 -9.663227702137 -8.77818348569819 -0.29898025415994 -0.271596987105688
40 1060 103.921698113208 528.525471698113 67.7373466632199 -83.561419173917 2.09579342904346 -2.58539021460273
41 982 93.2912423625255 575.073319755601 5.62113809073527 5.79151432642799 0.173918006161077 0.179189446700449
42 409 101.99511002445 41.361858190709 60.2375753339605 35.0363170150897 1.86375051261011 1.08402360876617
43 709 101.787023977433 76.7898448519041 19.0324294537713 1.07064795663402 0.588863345744327 0.0331258465656841
44 313 101.638977635783 624.690095846645 -15.0199817080103 -3.37421508225039 -0.464718217034819 -0.104398210823328
45 1287 115.923853923854 599.159285159285 -27.2747444342683 54.3393428524969 -0.843880561905994 1.68125920631372
46 831 108.04091456077 20.0409145607702 58.1263102930439 54.2108581707129 1.79842797463528 1.67728389040484
47 1482 112.901484480432 129.352226720648 21.6178010450267 30.3837845183573 0.668854739849684 0.940074258586537
48 847 119.094451003542 555.31759149941 22.5916551431745 -27.4977285900826 0.698985784543431 -0.850779691434346
49 220 108.045454545455 97.6318181818182 29.4290441442837 -29.2792754969447 0.910534592494001 -0.905900750714953
50 273 112.556776556777 59.5714285714286 41.3033156527658 32.0632370520172 1.27792453951812 0.992036518075893
51 898 119.554565701559 498.168151447661 -1.64209609465198 -65.6209173203159 -0.0508064513087611 -2.03031110757099
52 271 120.09594095941 5.41328413284133 14.2886251353124 12.6610174359392 0.442090045503849 0.391731865128605
53 1240 136.837096774194 644.53064516129 23.4413740926643 -12.6101342450769 0.725276087878286 -0.390157539260955
54 563 127.600355239787 464.241563055062 5.56693321861391 -43.067204450722 0.172240907479032 -1.33249925692918
55 512 127.30859375 44.541015625 -21.6513955570135 -3.05827752864288 -0.669894154012509 -0.09462310327253
56 630 129.131746031746 79.8920634920635 -1.4630915970603 2.24895696685092 -0.0452680523560078 0.0695827260072905
57 860 140.029069767442 446.362790697674 -9.38735774499077 -11.9478301416806 -0.290444837998275 -0.369665851051971
58 808 137.147277227723 573.726485148515 52.6103603712415 -21.2969392086319 1.62776449030186 -0.658927274995025
59 675 136.444444444444 526.306666666667 86.8488571127756 -79.353297822399 2.6871035407078 -2.45519094475271
60 207 127.75845410628 100.68115942029 9.09662413549449 7.62223148957708 0.281449540449733 0.235831833654886
61 945 142.258201058201 133.857142857143 7.14684976736425 12.5005911739282 0.221123523708019 0.386768276763678
62 1112 142.564748201439 620.125899280576 33.4489936836388 -28.6809859010792 1.03491182668882 -0.887389671296472
63 610 138.527868852459 490.480327868852 -3.90834393339376 33.0750285848737 -0.120924156872772 1.02334134695656
64 654 141.859327217125 13.5886850152905 37.5447505736753 11.9967731944469 1.16163454022786 0.371180149049131
65 697 146.738880918221 65.5466284074605 25.4535734990542 -31.5126824244509 0.787533535233056 -0.975002358522529
66 991 154.794147325933 107.776992936428 11.0613551942158 3.67898755455862 0.342238317181396 0.113827870771372
67 237 141.860759493671 35.4345991561181 7.11157787291602 0.0546882119094263 0.220032211333738 0.00169205321454001
68 423 152.420803782506 541.881796690307 -20.8945585161345 -22.4144956481046 -0.646477616824875 -0.69350446996661
69 230 150.865217391304 174.452173913043 -26.3110614211661 -46.6327675561022 -0.814064210572042 -1.44281777537143
70 404 158.764851485149 85.6237623762376 41.7273461777454 2.80537584472324 1.29104404348075 0.0867983254584826
71 1212 165.949669966997 476.78795379538 58.7362040287746 31.5305080888295 1.81729808612805 0.975553884558215
72 1206 169.553897180763 55.8739635157546 13.2636429353797 -8.4444683947052 0.410377097398787 -0.261271842568318
73 846 165.053191489362 595.562647754137 -1.05988969616828 -119.989723647943 -0.0327929859990587 -3.71248191377187
74 730 161.201369863014 509.104109589041 55.1035485749382 -36.3475735481417 1.70490373050055 -1.12459388441372
75 500 161.052 150.552 16.0352957138966 -23.8897942846319 0.496132031227037 -0.739150208109902
76 477 161.083857442348 22.398322851153 -6.86044055638719 25.7640014457776 -0.212262023044764 0.797138175553099
77 391 162.30179028133 441.074168797954 12.92175139285 -6.20254173989721 0.39979897346013 -0.191906634407673
78 1359 172.908020603385 568.10080941869 108.682468048104 -45.6644174224121 3.36263543831901 -1.41285702333177
79 377 169.013262599469 636.461538461538 39.881689440819 -40.610070306951 1.23393942613056 -1.25647552930375
80 699 180.144492131617 536.394849785408 -1.61858871202155 15.0576720183752 -0.050079132916799 0.465884355194822
81 635 177.688188976378 128.012598425197 2.33883755194024 -6.41501608851495 0.0723636312081589 -0.198480590513266
82 739 181.844384303112 161.706359945873 -4.6922530922991 25.2240430285853 -0.145178305361479 0.780431862736703
83 660 179.337878787879 616.178787878788 66.0834908024385 -15.7561931592389 2.04462313058397 -0.487496598502027
84 698 179.732091690544 16.5873925501433 -9.89769495587238 0.331468996090897 -0.306234670724965 0.010255650363644
85 796 185.640703517588 432.76256281407 35.3846116570214 -30.7367924199569 1.09479984459307 -0.950996322662227
86 739 187.082543978349 184.51150202977 -0.445612112147849 -9.01978347627326 -0.0137872382451723 -0.279072090540455
87 450 183.428888888889 92.0866666666667 -7.1699207788618 18.6985261183106 -0.221837340777624 0.578532376923342
88 270 179.588888888889 454.796296296296 -22.1118785425084 7.7848733966955 -0.684141497062198 0.240863974076928
89 322 181.695652173913 510.909937888199 -11.2567315460153 -20.9297945899108 -0.348283261284797 -0.647567820907605
90 734 193.66621253406 57.4073569482289 7.43257540459477 41.8201305093743 0.22996387460033 1.29391479059626
91 695 197.198561151079 111.087769784173 45.4826643106536 -4.19315992453605 1.40723358225981 -0.129736363316143
92 599 195.176961602671 496.016694490818 5.09377938584777 -36.9493474644913 0.157601528429123 -1.14321276870403
93 1840 214.642391304348 34.1902173913044 17.4109100465473 -12.9444254969187 0.538693537121286 -0.400500510214335
94 443 194.954853273138 142.03611738149 17.0705422378537 30.184434945657 0.528162557505791 0.933906383032964
95 300 195.806666666667 523.936666666667 5.15464305348533 9.09418185188895 0.159484650236897 0.281373976197744
96 485 197.851546391753 557.41030927835 22.1214084026233 -129.172466141928 0.684436350923359 -3.99659595613578
97 293 196.569965870307 456.941979522184 -8.37725493650836 -12.5726904864674 -0.259192258247831 -0.388999029411985
98 368 199.652173913043 7.72010869565217 30.5680125981393 -19.5831295249283 0.945774275166342 -0.605902005322225
99 540 202.933333333333 471.025925925926 23.7477114688264 -42.2308717362121 0.734754165949797 -1.30662312368944
100 534 204.908239700375 595.088014981273 43.9814387262058 54.322407316327 1.36078566437722 1.68073522084381
101 211 199.317535545024 615.165876777251 65.6449609585531 -12.5619063276623 2.03105501771082 -0.388665367550767
102 972 215.801440329218 82.4691358024691 58.2041021990956 34.1966194093729 1.80083485612042 1.0580433657963
103 1233 222.289537712895 581.276561232766 16.7773788418535 3.77873042075462 0.51909208236557 0.116913914938512
104 433 210.568129330254 171.741339491917 5.04699284210549 -3.59895713449535 0.156153952818725 -0.111351729665254
105 717 218.030683403068 510.417015341702 18.0623196103171 -8.66682225727886 0.558848148286562 -0.268151470824518
106 287 210.616724738676 194 3.6106234946965 -6.69992594859833 0.111712686836665 -0.207295701261569
107 538 211.236059479554 426.82156133829 11.9683217978744 9.20777606224779 0.370299862871401 0.284888580937594
108 527 214.058823529412 538.690702087287 113.583198518343 -13.8573062794127 3.51426403351782 -0.428745040590808
109 325 214.4 208.030769230769 33.9627974353249 -24.8352340321105 1.05080891418407 -0.768402112826124
110 207 213.24154589372 395.328502415459 -20.4377934764398 28.4408549507993 -0.632345307014036 0.879960019966775
111 416 216.762019230769 444.997596153846 -34.0936763129091 10.7588516990173 -1.0548583065083 0.332878859382559
112 456 216.677631578947 485.190789473684 47.9807346290531 -49.0447112165852 1.48452387508188 -1.5174433094951
113 1328 221.576054216867 138.297439759036 18.767336901917 7.00600576319313 0.580661382490189 0.216765810378479
114 173 213.416184971098 613.815028901734 15.8515408007677 -13.041760478967 0.490446654422942 -0.403512054448671
115 323 219.479876160991 107.371517027864 92.8072879015123 -38.1241533808959 2.87145738256303 -1.17956126242705
116 311 222.800643086817 409.337620578778 -32.0123186611196 -3.36024831446786 -0.99046110311919 -0.103966079043955
117 399 226.255639097744 220.441102756892 -23.2279212412065 -15.3764268737975 -0.718671856895931 -0.475746630060578
118 590 231.054237288136 183.071186440678 5.01573097440072 -21.0337048130709 0.155186710667346 -0.650782803094494
119 306 227.820261437908 456.339869281046 24.8834250989442 -22.3469380906835 0.76989314437938 -0.691414239216516
120 561 232.532976827094 560.934046345811 -4.42005306020946 13.0498498670565 -0.136756436676908 0.403762340107
121 165 229.10303030303 278.484848484848 3.07921958852145 1.94113374152272 0.095271050581455 0.0600586757642639
122 120 229.408333333333 288.583333333333 8.76446385740099 -5.27613240109796 0.271172501821711 -0.163243530514438
123 592 241.179054054054 389.869932432432 -6.96164781798202 -26.5005369614132 -0.215393375603885 -0.819926583572696
124 815 240.539877300613 477.647852760736 -64.7233669462225 -57.5364373491933 -2.00254090001307 -1.78017730642061
125 752 240.292553191489 536.210106382979 79.4974017341683 16.9382195873117 2.45964951961964 0.524068494847885
126 236 233.792372881356 420.059322033898 17.8940871986982 -40.1081969047896 0.553643037661608 -1.24094756680928
127 254 237.799212598425 311.007874015748 27.7262911535471 -7.5228430303483 0.857851416889078 -0.232756754838911
128 845 246.216568047337 146.69349112426 -6.67513262241179 44.8568585322297 -0.206528595777437 1.38787115218413
129 545 242.082568807339 13.005504587156 -7.55944515933903 19.1362514188825 -0.23388922466843 0.592075597227283
130 584 245.844178082192 206.027397260274 8.51712255401278 27.1759572456462 0.263519762175009 0.84082408640191
131 571 242.500875656743 509.243432574431 -22.9964432497529 21.5656919819974 -0.711509928102519 0.667242485498574
132 482 240.176348547718 81.9730290456432 27.0257835910384 44.1003555316879 0.836177713698425 1.36446495020416
133 229 239.532751091703 226.847161572052 -9.65815512503952 -5.42397932023252 -0.298823308630289 -0.167817914025016
134 280 242.082142857143 265.285714285714 4.43688415904961 1.6228493593457 0.137277190855961 0.0502109573401827
135 356 242.516853932584 435.230337078652 -46.7019125641916 -1.76633425813118 -1.4449571218434 -0.0546503799461005
136 459 244.071895424837 37.6601307189542 -12.4951788531315 6.41953613133531 -0.386600819564357 0.198620440633009
137 69 233.840579710145 53.7101449275362 -1.54446305169576 11.7958082593684 -0.0477856850702707 0.364962294185405
138 709 247.143864598025 113.448519040903 18.7429320476326 58.1839945359758 0.579906296326271 1.80021272504627
139 638 248.343260188088 287.851097178683 -18.3482864829674 1.54212763209683 -0.567695963002489 0.047713427190525
140 687 250.427947598253 61.296943231441 23.3217260378265 -31.5105073904016 0.721574177197113 -0.974935062971509
141 131 241.687022900763 450.358778625954 -69.1073994132102 -4.91361189237322 -2.13818285957649 -0.152027146385071
142 354 249.344632768362 349.406779661017 53.8442571859935 -29.1600227725502 1.66594125635282 -0.902211071557248
143 704 255.867897727273 409.053977272727 -18.2355870964536 -17.3832127350132 -0.564209044111391 -0.537836582333788
144 875 259.893714285714 163.974857142857 -5.49729706686902 26.9413302306622 -0.170086365022913 0.833564726824033
145 1683 272.251931075461 222.913250148544 -15.3651860227586 -9.85502516917506 -0.475398838142165 -0.304914467572876
146 407 249.594594594595 367.434889434889 35.2093261499199 -8.1091148775075 1.08937651120187 -0.250896005126028
147 1260 270.292857142857 189.362698412698 -23.1324206924479 27.9638316774742 -0.715717070025501 0.865200920430353
148 540 260.187037037037 95.5 20.6790494338623 51.9210683190626 0.639809766063449 1.60643779498811
149 536 259.027985074627 455.723880597015 -20.2573672012487 -44.0837235295927 -0.626762918263964 -1.36395035607817
150 350 259.771428571429 259.665714285714 -5.93418463367784 -0.578042392470791 -0.183603665845176 -0.017884630968379
151 178 254.842696629213 302.185393258427 15.5301834525803 -32.9261690188808 0.480503858433982 -1.01873563215333
152 845 268.919526627219 432.157396449704 4.18751400529677 22.5073616479714 0.129561678581274 0.696377743897314
153 833 267.132052821128 31.3265306122449 -12.9793037377924 -19.3324931804645 -0.401579642947465 -0.598147317108378
154 166 260.487951807229 273.71686746988 25.9391705813404 10.2697694674505 0.802557908409022 0.317746655691797
155 565 264.364601769912 488.410619469027 -0.499717184869026 -9.7456074320987 -0.0154612491338883 -0.301529082911656
156 214 262.780373831776 5.78971962616822 38.5109705936006 15.5248736434323 1.19152938655004 0.480339572944954
157 679 268.754050073638 513.135493372607 45.3602170810923 -33.1402816323355 1.40344506511586 -1.02536027617113
158 207 263.251207729469 312.473429951691 10.5211674861063 -22.8429191992181 0.325524910104282 -0.706759894152846
159 799 269.315394242804 381.720901126408 61.9481034466984 -7.16037090824907 1.91667425048095 -0.221541867791682
160 603 270.89552238806 533.363184079602 2.87976672806792 -11.8056858934312 0.0890999793049149 -0.365267908172121
161 723 276.520055325035 80.6652835408022 -19.1025497290656 19.3258842262086 -0.591032866982521 0.597942836071183
162 128 265.6015625 129.59375 2.23924421351717 33.6582140769259 0.0692822134301445 1.04138510542016
163 501 270.203592814371 344.253493013972 29.6886280179136 27.5310093181346 0.918566117250115 0.851809397122583
164 1047 285.962750716332 110.928366762178 15.4936323141784 31.7175050873619 0.479372966253222 0.981339571481023
165 897 281.026755852843 250.706800445931 -34.4969769870303 13.6833949384351 -1.06733642890885 0.423364223897924
166 545 276.411009174312 290.726605504587 -41.1812873244888 13.8684226614124 -1.27414898317943 0.429088981437288
167 448 277.774553571429 55.2566964285714 60.9907979082239 -54.9716592158253 1.88705521820475 -1.70082307387897
168 662 280.401812688822 474.089123867069 5.26728224315445 -15.1237396737007 0.162969706637689 -0.467928488375769
169 822 288.615571776156 13.6630170316302 125.889700573953 57.1106448032519 3.89502719318056 1.76700328553142
170 437 281.54233409611 141.263157894737 -7.91125236630778 31.2155749847492 -0.2447741392536 0.965809854674652
171 248 276.745967741935 313.177419354839 -11.1496465257682 -9.55622504223846 -0.344970050879631 -0.295669591983866
172 510 289.033333333333 414.190196078431 12.5523530020497 5.96281095810748 0.388369787667133 0.184489364290608
173 390 284.382051282051 362.441025641026 -50.3847248830921 16.1957368999188 -1.55890333081918 0.501096081340855
174 287 283.867595818815 333.456445993031 -8.75439397310563 19.5217898534526 -0.270860939613018 0.604004155956238
175 252 286.634920634921 392.396825396825 -31.8671995077837 54.5710271057536 -0.985971116679336 1.68842751684709
176 528 292.462121212121 451.768939393939 27.1818332966517 14.222347690934 0.841005891413367 0.440039421449846
177 606 293.93399339934 497.435643564356 3.85429695257936 -24.6976059512022 0.119251943347586 -0.764143900158693
178 541 293.038817005545 159.97966728281 20.5364842106558 -15.4382375598301 0.635398798218906 -0.477659052616425
179 499 297.633266533066 284.669338677355 14.3369784400944 -6.2779754785542 0.443586096699042 -0.194240554196287
180 434 293.147465437788 310.691244239631 37.2531884156072 33.1673666936159 1.15261360738744 1.02619828793647
181 1464 300.386612021858 60.6646174863388 -21.4694832771298 37.7594341443709 -0.664265788278932 1.16827684966204
182 376 297.630319148936 127.204787234043 2.53921311844656 -15.2356987241141 0.078563251008927 -0.471392501268759
183 509 297.840864440079 255.858546168959 5.09152408812623 1.93031707136655 0.157531749520173 0.0597240080018824
184 331 295.85498489426 433.359516616314 70.7226744161652 -23.9808790276141 2.18815946633853 -0.741968369954614
185 334 299.640718562874 375.443113772455 62.1911194156002 -1.20202266040032 1.92419316428354 -0.0371905797514239
186 950 308.789473684211 354.464210526316 -11.2984274438363 -29.59622332007 -0.349573332316156 -0.915707116003487
187 205 299.073170731707 330.346341463415 11.3770517194747 -1.46761774202296 0.35200596731536 -0.0454080912760263
188 242 300.351239669421 178.111570247934 5.73898502983991 -10.7529292758074 0.177564190323506 -0.332695619615151
189 687 307.886462882096 397.016011644833 27.5625410777417 -105.809656151224 0.852784989729116 -3.27375064148316
190 359 310.00278551532 223.827298050139 5.66555988525482 27.7182671222235 0.175292416433202 0.857603153369012
191 673 307.682020802377 471.41456166419 56.7274694271433 -18.9098432658622 1.75514783982859 -0.585070529229258
192 340 309.532352941176 508.897058823529 -1.53178011561371 11.6996731758748 -0.0473932750422563 0.361987874810991
193 1282 318.460998439938 139.460998439938 29.6057664095844 -23.3925910571363 0.916002379182254 -0.7237667408143
194 916 321.405021834061 193.96943231441 46.0620732679826 10.7765954661052 1.42516049474335 0.333427851516162
195 449 314.051224944321 240.857461024499 24.7937886437452 29.9023484916761 0.767119792557041 0.925178628466276
196 1568 327.349489795918 333.825255102041 4.94102287941806 -4.16322085744554 0.152875242293193 -0.12881004861427
197 537 314.633147113594 267.810055865922 16.4527715991231 -43.643742083931 0.509048734643129 -1.3503373306477
198 962 325.164241164241 296.517671517672 -14.2879886445412 4.12135569432746 -0.442070352480111 0.127514740514812
199 923 325.426868905742 425.695557963164 30.8500743441482 -14.9447076899986 0.954501265268406 -0.46238923900279
200 1466 321.134379263302 27.2428376534789 138.219760804234 51.525754617267 4.27651924274092 1.59420678950227
201 369 316.951219512195 172.761517615176 30.4901549512804 -9.32196216936675 0.943365359660707 -0.288421498962532
202 522 323.931034482759 212.946360153257 67.6842935759776 39.8162273490116 2.09415196658427 1.23191402908418
203 726 323.768595041322 452.01652892562 9.93721194531753 64.7547073583567 0.307457326333643 2.00351057232901
204 889 324.305961754781 94.992125984252 49.6519438559858 -34.9626768345428 1.53623108667043 -1.08174518166345
205 461 325.53579175705 67.3210412147505 34.8279011976014 -5.17482985441319 1.07757522360912 -0.160109229834742
206 624 329.355769230769 379.322115384615 6.58650556035025 -98.0648698081812 0.203786474577629 -3.03412696080085
207 336 331.294642857143 407.360119047619 -75.6155145875544 18.5532167998312 -2.33954393569988 0.574036506774159
208 192 335.604166666667 4.77083333333333 67.1657630103229 7.09944839661057 2.07810863147018 0.219656925350585
209 781 344.307298335467 117.970550576184 -24.125597922081 14.1364020542303 -0.746445972385515 0.437380263547571
210 463 337.671706263499 254.552915766739 17.9018689868295 39.7271895003872 0.553883806177577 1.22915919814858
211 459 339.337690631808 233.749455337691 38.9411171181775 21.5294041225531 1.20483811953329 0.666119739168466
212 350 337.285714285714 274.425714285714 -22.173715913714 14.7843374927484 -0.686054745257263 0.457427385281495
213 623 343.852327447833 172.714285714286 14.0594074042993 77.2310632350298 0.434998049165906 2.38952900902306
214 886 349.332957110609 151.306997742664 -18.276258357954 -6.2518363081783 -0.56546741289615 -0.193431808294461
215 450 346.86 54.3822222222222 49.1301522381182 26.033526366651 1.52008685460457 0.80547727629967
216 720 356.997222222222 307.634722222222 28.87393640876 -7.1756091678753 0.89335955978559 -0.222013339527259
217 353 346.269121813031 73.7450424929178 52.8898670265538 -19.0193066298363 1.63641242590066 -0.588457325586642
218 876 355.393835616438 211.616438356164 33.5450615984873 51.6441920341356 1.03788416786542 1.59787124304605
219 1499 361.313542361574 370.454302868579 65.625923255818 2.86518330345805 2.03046599120976 0.088648768164002
220 905 357.782320441989 38.3403314917127 79.0199070181266 43.1496389589775 2.44487583364611 1.33504978052124
221 605 353.851239669421 399.269421487603 51.0590520986296 16.6821822528552 1.5797670141042 0.516146700009778
222 829 361.56574185766 13.6091676718938 39.088951837242 43.9351695209095 1.20941212557371 1.35935409521775
223 667 356.730134932534 93.1214392803598 45.248245990384 -5.06312198791151 1.39998067969616 -0.156652988571696
224 258 350.193798449612 327.953488372093 3.90763339082861 16.3384937065082 0.120902172686611 0.505512976775052
225 1289 365.723816912335 280.802172226532 21.0795645973705 31.7573283725575 0.652201704768787 0.982571703879871
226 150 352.813333333333 192.673333333333 -58.3989819880026 -34.3652137849104 -1.80686443656849 -1.06325967558449
227 596 361.696308724832 417.036912751678 -8.43778919417064 -29.5375750351437 -0.261065188111343 -0.913892538134289
228 638 363.416927899687 249.540752351097 -11.9983916784519 93.2494911701104 -0.371230224942412 2.88513915119264
229 372 369.075268817204 340.698924731183 60.8825366124165 19.2426485564974 1.88370561383508 0.595367524544588
230 1184 373.085304054054 137.858108108108 86.622247866483 -15.4796855664076 2.68009225088415 -0.478941453892988
231 482 369.641078838174 186.182572614108 78.8902471307595 46.6766758547033 2.44086415687782 1.44417629808042
232 763 376.828309305374 71.1533420707733 -15.3468505103857 -3.43935272190262 -0.474831537410114 -0.106413569320396
233 268 364.865671641791 326.690298507463 15.4087295932166 -35.0129945229059 0.476746076162822 -1.08330201088442
234 987 380.038500506586 227.961499493414 44.4545486905032 36.8266793926794 1.37542368613676 1.1394174187011
235 869 381.754890678941 103.043728423475 -1.06899620486498 46.5142477405722 -0.033074741367821 1.43915077241316
236 688 390.504360465116 177.529069767442 25.5130126511358 4.05131812659194 0.789372582531141 0.125347778248397
237 1433 391.692254012561 320.794836008374 -10.9026289051519 -1.50272540404765 -0.337327325977526 -0.0464943222993086
238 134 381.664179104478 5.27611940298507 11.2174150838375 29.0666866550594 0.347066809989544 0.899323252187791
239 949 388.101159114858 36.7945205479452 48.6233758891447 -13.2357908182295 1.50440719494128 -0.409515352925704
240 884 392.898190045249 262.537330316742 -3.12559072319449 61.2026032569613 -0.0967057734357207 1.89360847545481
241 398 388.721105527638 199.268844221106 -85.0046071339401 -62.2244554793227 -2.63004244845135 -1.92522458205736
242 687 403.224163027656 163.554585152838 -10.1767030491042 21.7439745665349 -0.314867180813563 0.672758548462248
243 234 384.940170940171 362.346153846154 -3.04786092509631 19.7699252721635 -0.0943008135705966 0.611681465530126
244 505 403.275247524753 382.188118811881 15.4721011495349 -17.9602545386492 0.478706792043538 -0.555690255084752
245 705 401.324822695035 362.232624113475 -5.06762613281451 -8.85115717926731 -0.156792346809894 -0.27385479310207
246 900 408.392222222222 13.2144444444444 60.1365481749307 -20.2841733683105 1.86062473242415 -0.627592301042498
247 1114 405.458707360862 131.056552962298 10.0350315684143 9.99594429760593 0.310483865361469 0.309274505246928
248 1127 408.044365572316 66.5093167701863 31.6145435534534 21.2679947149169 0.978153941738502 0.658031732392264
249 1094 415.014625228519 302.348263254113 29.2111481506952 19.4166766624718 0.903792890699153 0.600751953946341
250 753 407.527224435591 210.171314741036 17.5269294827561 -38.8919078972017 0.542283178346186 -1.20331558629203
251 524 403.166030534351 97.2442748091603 1.73411485973229 23.3495674509169 0.0536535117961291 0.722435590486597
252 883 413.864099660249 253.904869762174 -25.5014719802882 5.46081582560298 -0.789015514188188 0.168957635459458
253 290 413.541379310345 392.51724137931 -4.41536553401718 -25.3181554395872 -0.136611404621828 -0.783343700626515
254 395 419.427848101266 229.891139240506 26.7275847355853 5.71441478256086 0.826951441448436 0.176803986900519
255 611 418.504091653028 339.255319148936 0.602720038291815 6.1174286644087 0.0186481573021326 0.189273235948455
256 607 423.718286655684 35.0823723228995 37.2031826286746 -7.99865607580775 1.15106642839638 -0.247478409926539
257 801 431.504369538077 404.65418227216 37.5596036666754 18.590967503735 1.16209409490846 0.575204513510189
258 742 431.826145552561 190.38409703504 16.3890766454778 -16.1637939030299 0.507078012849483 -0.50010776505329
259 439 426.004555808656 281.806378132118 56.1507144131611 39.5967114461329 1.73730304034919 1.22512220729773
260 178 420.85393258427 104.292134831461 12.4476354177687 -23.4463583990605 0.385129825728078 -0.725430302312542
261 975 432.910769230769 159.565128205128 31.3665013937153 12.5475826346463 0.970479517597128 0.388222192505075
262 214 427.630841121495 52.3971962616822 -49.8939879412032 8.3096009527279 -1.54371993039293 0.257099044066285
263 693 431.282828282828 365.064935064935 36.4456666461437 -3.42205686348207 1.12762888475481 -0.105878435480453
264 773 434.827943078913 128.107373868047 4.60730991724164 2.19287045440955 0.142550163621405 0.0678474093758757
265 623 434.573033707865 74.4028892455859 7.23806602882507 63.4227888916065 0.223945754734309 1.96230101647624
266 104 428.048076923077 175.788461538462 24.7054440659234 2.19206860942745 0.76438641141929 0.0678226002930375
267 452 435.438053097345 96.2920353982301 43.1762320881088 20.9427955563419 1.33587257190644 0.647970070794261
268 676 436.409763313609 228.189349112426 8.30694466059781 61.6321001975871 0.257016858390789 1.90689711031134
269 501 443.15369261477 7.07984031936128 86.5767905135686 -24.6970462187734 2.67868580043646 -0.764126582037981
270 601 445.687188019967 322.459234608985 -5.71758251761654 -5.66668600755929 -0.176901996619554 -0.175327258656027
271 479 437.889352818372 261.308977035491 6.86752060959138 -16.4160021767439 0.212481079882883 -0.507911088756359
272 582 446.484536082474 378.652920962199 -9.440695754189 18.3022261653149 -0.29209511594246 0.566270856826486
273 707 446.586987270156 292.652050919378 36.1093853215953 39.1042656008168 1.11722434095414 1.20988593340137
274 510 444.427450980392 341.352941176471 12.7748530712 9.08692544630196 0.39525393955465 0.281149463017101
275 537 449.674115456238 57.3333333333333 22.7655377484073 7.08781346355043 0.704365712152401 0.219296940534881
276 469 450.025586353945 21.0319829424307 86.6546823968956 -8.47868139250195 2.68109577521838 -0.262330392681401
277 621 449.895330112721 211.867954911433 -15.326451876395 2.4606426023664 -0.474200403697545 0.0761322793303926
278 346 452.722543352601 38.4248554913295 80.9512300236545 -7.33675924807544 2.5046309652498 -0.226999322826139
279 620 457.8 417.133870967742 12.8208714685128 6.82158787434821 0.396677748715389 0.211059921106481
280 785 455.169426751592 126.482802547771 -11.9707648018057 1.4257773212095 -0.370375449410268 0.0441135487034445
281 820 458.089024390244 255.284146341463 13.3162541032516 38.1879421590715 0.412004886873157 1.18153488715156
282 763 465.815203145478 190.73001310616 -2.30529949089802 2.73283475221018 -0.0713259636374964 0.0845539041382856
283 844 463.862559241706 86.4265402843602 31.5070172874418 -2.52760218559801 0.974827079189884 -0.078204008759743
284 606 463.03300330033 162.831683168317 14.9859455176193 24.0840480183797 0.46366513734267 0.745160418412054
285 301 460.920265780731 454.162790697674 16.1304581570286 7.88188119731026 0.499076357109766 0.243865395318081
286 879 468.240045506257 390.450511945392 24.8837369528515 15.8644445589819 0.769902793138919 0.490845896687474
287 32287 551.78105739152 313.556199089417 6.08128214081435 28.4173294718355 0.188154862549383 0.879232141674278
288 593 468.20741989882 436.50084317032 47.2197794668504 -57.8458744187314 1.46097992322515 -1.78975128900167
289 815 476.478527607362 110.174233128834 11.1669096714236 16.8566466241702 0.345504172586659 0.521544627460674
290 693 472.128427128427 223.04329004329 8.24910199009112 15.3002789429228 0.255227206230822 0.473390613165558
291 295 466.830508474576 345.44406779661 9.14031418538665 -7.47447565312666 0.282801310543915 -0.231260268242452
292 280 468.803571428571 288.789285714286 28.8392650471882 -1.91450582085537 0.892286827897825 -0.0592348079289739
293 707 473.721357850071 56.3719943422914 20.1227310827752 51.1620351288206 0.622597276910878 1.58295330894167
294 1037 478.511089681774 475.100289296046 6.35992534155527 -37.0408241746189 0.196776082864728 -1.14604305801178
295 652 476.970858895706 22.090490797546 95.8525246625021 10.7169431126179 2.96567700449914 0.331582207766825
296 585 476.505982905983 140.266666666667 15.014901697682 12.2533419766674 0.464561041521014 0.379118386880454
297 136 473.772058823529 4.26470588235294 69.1955441802934 -63.1584908761574 2.14091005857022 -1.95412363617757
298 491 482.739307535642 244.368635437882 25.3834430287476 7.36989936519352 0.785363698561197 0.22802467801224
299 973 487.819116135663 183.411099691675 -1.3008997953617 -12.1279447260235 -0.0402498381951448 -0.375238596087549
300 49 478.326530612245 417.65306122449 -13.7069285667943 -11.2988230871971 -0.424092354332705 -0.349585573521289
301 243 486.576131687243 41.1728395061728 -1.51163265405572 -4.81385397783994 -0.0467699126044703 -0.148940636622392
302 536 489.526119402985 423.772388059701 27.7209297958604 -71.6462248523256 0.857685536488324 -2.21673411578736
303 1089 500.301193755739 465.35261707989 -14.2722149433441 19.3977791677427 -0.441582314182936 0.600167265480823
304 838 496.41169451074 72.1408114558473 25.817216201974 6.94361163339528 0.798784640049548 0.214835336073198
305 459 498.518518518519 155.932461873638 52.5560413246025 -1.94884464831354 1.62608385906037 -0.0602972512116389
306 121 491.140495867769 4.58677685950413 -55.6809936757853 38.9400168174594 -1.72276988126677 1.20480407623031
307 820 505.398780487805 97.6804878048781 12.9048825964436 -12.1146194134451 0.399277052918419 -0.374826310931468
308 813 502.910209102091 131.939729397294 33.581689612834 29.5797954027527 1.03901743858783 0.915198836260296
309 1276 509.477272727273 32.6669278996865 5.70438649886148 34.8413696833894 0.176493711814218 1.07799193854415
310 798 505.527568922306 202.125313283208 8.84460536544075 17.0848844288808 0.273652079989697 0.528606304879927
311 234 508.136752136752 6.20512820512821 48.2350978080792 31.7081848897164 1.49239387155286 0.981051204576427
312 377 506.527851458886 418.872679045093 -8.12888858197796 40.7783984444189 -0.25150780351995 1.26168360168637
313 583 514.667238421955 441.355060034305 -33.8366376415022 3.04295284910805 -1.04690553030608 0.0941489577050784
314 430 514.288372093023 174.727906976744 57.5780774154427 4.95204220212862 1.78146565002321 0.153216180125378
315 645 522.941085271318 503.603100775194 5.46417291303893 28.4156915950507 0.169061503740925 0.879181465768414
316 677 513.723781388479 522.96011816839 26.2313434995403 1.92176505008762 0.811597738167223 0.0594594084731982
317 1052 525.577946768061 63.4942965779468 9.37085570462981 -8.81334257904946 0.289934264888197 -0.272684809414157
318 739 528.610284167794 463.242219215156 -24.1716802459731 -25.1983536344992 -0.747871759434548 -0.779637032912774
319 462 525.865800865801 149.495670995671 49.5146256565985 -44.9983870162865 1.53198246173691 -1.39225004332056
320 640 531.94375 13.534375 49.8568077937898 55.0672322707663 1.54256957667406 1.7037801040906
321 629 529.759936406995 125.798092209857 87.4278642867588 43.8032429240126 2.70501802201508 1.35527228645918
322 380 525.355263157895 104.073684210526 2.92953471181264 -4.10341702362796 0.0906398006656112 -0.126959718063686
323 704 540.742897727273 431.475852272727 18.7539539662908 22.6936915889653 0.580247314477073 0.702142792060636
324 583 536.322469982847 489.017152658662 1.11072358775274 66.3597478835506 0.0343657865471094 2.0531705243607
325 959 535.061522419187 181.318039624609 47.4201218596996 12.3179169542215 1.467178516633 0.381116336612841
326 326 536.061349693251 530.306748466258 18.6355272405359 -43.3957630317777 0.576583191716341 -1.34266485905493
327 555 541.567567567568 91.3711711711712 -16.2905106942475 29.0404200630809 -0.504028382430048 0.898510563861725
328 582 540.431271477663 551.792096219931 -12.9138357278167 -46.6654715013224 -0.399554062792964 -1.4438296353995
329 1242 551.103864734299 40.0885668276973 -11.8555454203997 87.5485410386059 -0.366810561880059 2.70875176058055
330 940 558.673404255319 457.079787234043 14.648219893617 37.5000857648204 0.453215906918533 1.16025261109247
331 678 554.041297935103 167.48820058997 61.9545069601923 25.3947770680016 1.9168723751812 0.785714373722879
332 940 557.6 567.360638297872 17.7984947861157 -44.2359573280084 0.55068540852457 -1.36866046962873
333 693 557.131313131313 140.217893217893 60.3442338105443 54.8640061684632 1.86705052575482 1.69749228871551
334 766 558.772845953003 504.033942558747 29.5762915796048 20.0528739899011 0.915090427976068 0.620435898536471
335 457 553.997811816193 117.687089715536 44.990234144482 -13.8114779063346 1.39199779347616 -0.427327110779676
336 677 556.930576070901 629.118168389956 15.8342662245738 35.0463305941672 0.489912179055066 1.08433342889148
337 609 560.591133004926 531.584564860427 9.01117391998552 19.2796904663534 0.278805710878663 0.596513601193581
338 924 569.590909090909 14.8106060606061 20.8037232191278 10.4755283894813 0.643667172838364 0.324112836506395
339 371 555.636118598383 79.0835579514825 -57.5684711313469 -2.69221622693209 -1.78116843160417 -0.0832971670121845
340 356 557.699438202247 481.418539325843 14.7606743465065 -5.59868442001541 0.456695247563571 -0.173223289614435
341 1369 571.515704894083 648.035792549306 41.9453208884432 -41.8889429613316 1.29778818078287 -1.29604384778189
342 723 568.118948824343 598.569847856155 39.4462562310991 -21.6287892351137 1.22046712311498 -0.669194714438531
343 403 566.622828784119 105.146401985112 -39.3495226991861 41.4281864977197 -1.21747418774715 1.28178804331957
344 246 567.260162601626 433.439024390244 -11.5123429238037 32.1785926079632 -0.356191877024074 0.995605618846217
345 996 576.918674698795 696.70983935743 -5.1248071485274 48.2070469107049 -0.15856152737129 1.49152597681987
346 791 574.63590391909 75.1289506953224 -25.9105842043176 53.5143882555175 -0.801673445936314 1.65573511201749
347 957 579.450365726228 172.453500522466 56.5767069499634 -2.2947368584647 1.75048324895539 -0.0709991558019723
348 378 575.293650793651 517.984126984127 -10.9976525122563 -1.12752106932649 -0.340267356273716 -0.034885500607977
349 811 585.530209617756 49.6239210850801 41.8994359292862 35.8611496282743 1.29636850019852 1.10954392888393
350 909 586.815181518152 444.854785478548 28.755873259699 67.7918562481984 0.889706686087355 2.09747995554096
351 1116 587.600358422939 488.023297491039 21.7083382353461 15.7030404025086 0.671655960415628 0.485852052268992
352 1212 588.868811881188 128.526402640264 9.48441089814185 46.3302742446987 0.293447662446851 1.43345863265919
353 905 581.434254143646 557.158011049724 -5.63643006488203 48.7531317585815 -0.174391139823859 1.5084218413947
354 681 590.660792951542 89.4654919236417 -41.3319912088682 23.2262403448395 -1.27881176119145 0.71861984996424
355 363 585.044077134986 663.446280991736 17.8964392999791 17.2771986578764 0.553715811672574 0.534556506907244
356 228 587.697368421053 34.7719298245614 19.539311529821 -2.44178949769048 0.604546276603232 -0.075548964293072
357 850 595.641176470588 614.630588235294 57.5348006775489 29.3331269089545 1.78012666780179 0.907566913341548
358 1303 600.339217191097 580.45049884881 24.6206686926903 3.170137312466 0.761763461467469 0.0980840448573296
359 788 600.459390862944 157.228426395939 10.1296456540258 12.1688668680475 0.313411225063133 0.376504727115426
360 624 596.149038461538 523.570512820513 -7.50849562078947 7.32476278321497 -0.232312846003409 0.226628152216943
361 571 597.136602451839 677.866900175131 -12.8161107567857 -2.01504329961943 -0.396530452299945 -0.0623454374080691
362 317 594.517350157729 7.47318611987382 42.106780179871 -9.5851613212225 1.30278373107678 -0.29656488042286
363 194 592.175257731959 719.025773195876 17.3455167934925 -40.6862621342524 0.536670269945832 -1.25883290435416
364 404 602.326732673267 23.7054455445545 -8.41782175297965 -12.1979401060856 -0.260447395503508 -0.377404253067397
365 932 612.624463519313 102.600858369099 32.7651296563844 22.8265736623562 1.01375307446008 0.706254163260852
366 884 609.87443438914 645.837104072398 98.6414102159044 -7.73696887986117 3.05196512036283 -0.239381808380329
367 549 607.029143897996 698.808743169399 -3.10340117846413 -40.3180312198681 -0.0960192289468942 -1.24743984028016
368 1008 608.37996031746 202.149801587302 21.440389646109 45.3011323292179 0.663365631368098 1.40161698295978
369 1139 615.859525899912 474.092186128183 67.9334864016826 -6.91744555996429 2.10186199232936 -0.214025757790878
370 235 604.982978723404 60.8297872340426 6.67578962500581 -9.84329257125075 0.206548923436952 -0.304551461006386
371 739 614.995940460081 717.005412719892 41.4794477044636 0.516030179994928 1.28337406499817 0.0159659731846083
372 612 615.316993464052 535.174836601307 22.3240880895224 0.634237040600639 0.69070726020647 0.0196232933178727
373 234 608.252136752137 426.384615384615 -9.10933183708369 21.2827679891597 -0.281842716722511 0.658488817480604
374 561 615 448.69696969697 35.0097913809467 36.5119295091929 1.08320290567583 1.1296790576625
375 461 618.167028199566 76.1995661605206 18.8333905897485 0.940826879119432 0.582705083516887 0.029109182574413
376 660 616.980303030303 504.44696969697 43.25341714719 20.2882463756626 1.338260677547 0.627718319885357
377 722 622.445983379501 670.771468144044 -48.2764847776029 11.7563398895229 -1.49367438434305 0.363741142867085
378 792 625.652777777778 53.9356060606061 24.4436768836707 -15.0768508207417 0.756287335096859 -0.466477747318321
379 1147 626.314734088928 137.870095902354 -9.96052299105621 5.12109104796059 -0.308178570062396 0.158446551223961
380 732 622.225409836066 174.148907103825 24.7573329760372 25.272024438673 0.765991854239443 0.781916407510476
381 202 613.737623762376 555.163366336634 38.9259782462326 8.71543265151835 1.20436972285246 0.269655476367233
382 621 621.024154589372 619.024154589372 69.9709673114671 29.8501903100056 2.16490164937052 0.923564854384463
383 233 617.278969957082 6.28755364806867 42.0950024789049 4.12695199573999 1.30241932902223 0.127687890074177
384 701 622.156918687589 404.139800285307 61.9710074533457 -2.60093671333181 1.91738290042068 -0.0804729789647711
385 625 624.5568 577.488 -82.2790885577288 -37.5531702394233 -2.54571490679018 -1.16189504467656
386 721 626.174757281553 27.2926490984743 0.0482304600375488 35.1337951596309 0.0014922503789379 1.08703958244787
387 574 625.308362369338 238.04181184669 13.7496861002126 18.5698669133304 0.425415272368242 0.574551661266967
388 576 631.213541666667 431.791666666667 -32.0398965668287 11.810789497009 -0.991314363490598 0.365425813661039
389 736 637.119565217391 264.358695652174 -7.45396884819337 25.9542042119733 -0.230625787721041 0.80302304892378
390 1075 640.701395348837 560.231627906977 30.4234419351925 -55.9403278359523 0.941301259018504 -1.73079367988863
391 683 638.174231332357 721.696925329429 26.8174557958982 -8.59778614350789 0.829732051952733 -0.266015493542632
392 369 631.390243902439 211.677506775068 65.1428978123571 22.8499380123596 2.01552118453613 0.706977056223495
393 635 639.952755905512 694.414173228346 61.8018059938645 92.4415381209919 1.91214780745596 2.86014108476797
394 704 648.823863636364 83.0795454545455 41.6793738615199 41.6105509399006 1.28955978007106 1.28743039895411
395 833 645.453781512605 517.426170468187 22.9589912686249 4.92874243847111 0.710351163848835 0.152495285464203
396 1029 644.00583090379 372.65306122449 43.0341111954759 -38.8987987541707 1.33147535164934 -1.20352878939885
397 1509 651.987408880053 599.911862160371 3.26430689251544 -23.8739422372193 0.100997651557406 -0.738659745780909
398 457 642.120350109409 190.899343544858 47.9378613068592 18.867739935326 1.48319737454175 0.583767852230151
399 642 645.619937694704 454.021806853583 49.7816711027855 23.0540865851819 1.54024484753949 0.713293412835408
400 395 644.091139240506 6.93164556962025 34.4801598469751 -10.032925377874 1.06681610661458 -0.31041869982854
401 429 644.412587412587 497.009324009324 9.86362306664493 14.1111692129561 0.305180486510856 0.436599559467125
402 1002 642.425149700599 639.994011976048 35.4035017764472 23.2721162479827 1.09538430486671 0.720039250355533
403 674 645.284866468843 102.919881305638 7.90837777589122 7.73738065298911 0.244685199429367 0.239394548640441
404 403 645.895781637717 473.593052109181 90.440843409115 51.3594360860761 2.7982395926484 1.58906089433559
405 435 645.926436781609 171.303448275862 27.6337427403218 9.94046029274592 0.854987969088706 0.307557830199398
406 698 647.179083094556 297.557306590258 -3.67255414977949 33.0982579675619 -0.113628821234792 1.02406006403062
407 1509 656.418157720345 405.399602385686 104.822586540773 74.8369395785314 3.24321070885371 2.31545482580249
408 654 652.978593272171 671.319571865443 34.7767876203675 -10.42886633547 1.0759937695874 -0.322669112608133
409 686 651.860058309038 212.434402332362 39.0045007042009 -40.2274500610567 1.20679920761307 -1.24463725932912
410 420 648.957142857143 239.019047619048 -8.58442983382769 17.9654358347191 -0.265602249336253 0.555850564379287
411 890 658.073033707865 123.607865168539 34.8099934464116 26.4800326724872 1.07702115780759 0.819292180896545
412 997 652.479438314945 34.1013039117352 32.3096028926581 -19.4477637668845 0.9996590769063 -0.60171378892166
413 573 654.132635253054 327.760907504363 -4.56684951241888 68.0582169816514 -0.141298318742012 2.10572115633233
414 1048 665.951335877863 61.9083969465649 -0.239426544673253 20.4087537824119 -0.00740785702102569 0.6314468189137
415 843 659.538552787663 538.395017793594 43.9026155435891 -119.527001826389 1.35834687519633 -3.69816530113707
416 639 657.580594679186 150.190923317684 11.0615471583324 17.2992392027223 0.342244256550946 0.535238441339814
417 326 658.052147239264 436.641104294479 20.8645142046316 -4.86609009185747 0.645548045861001 -0.150556821930934
418 809 668.85414091471 280.326328800989 -3.41249460964261 4.23332129345352 -0.10558257935749 0.130978956024964
419 455 660.881318681319 258.525274725275 31.7604525295464 41.2790369077463 0.982668365293568 1.27717335517471
420 905 666.278453038674 355.234254143646 -38.1274883122022 -9.65156721116086 -1.17966444519789 -0.298619478582345
421 951 668.738170347003 701.386961093586 85.65186274066 -50.2133350789613 2.65006853619021 -1.55360053047348
422 1041 675.589817483189 563.715658021134 -39.8534406980251 -36.8401563604496 -1.23306541006051 -1.13983439606865
423 931 669.045112781955 486.199785177229 57.1081020995248 52.4853868168601 1.76692461428099 1.62389780867084
424 1093 673.897529734675 191.866422689844 -5.7903182798657 -16.1126697912654 -0.179152441021166 -0.498525985093196
425 224 666.232142857143 642.258928571429 14.4825799079157 -9.83780877709147 0.448091005948532 -0.304381792421308
426 188 664.654255319149 653.734042553191 21.8145948019478 16.201989350042 0.674943538465943 0.501289532140584
427 817 672.177478580171 234.045287637699 -3.99383107485261 -7.54188035713218 -0.123569128932689 -0.233345769708043
428 803 676.581569115816 626.022415940224 70.2926799703931 -13.8507558499231 2.17485543867333 -0.428542370309817
429 851 675.957696827262 16.1680376028202 6.69978775067855 8.87321597911693 0.207291425418087 0.274537292344434
430 487 673.347022587269 308.459958932238 21.4815975399627 -4.89705151739325 0.664640603557263 -0.151514768401946
431 871 681.956371986223 436.464982778416 -55.4596714632887 89.8616562518438 -1.71592217226279 2.78031954265839
432 560 676.098214285714 459.276785714286 4.78323926267159 57.6170828750257 0.147993417369757 1.78267247889853
433 674 679.09940652819 156.753709198813 43.6433624585669 73.8467502370162 1.35032558503936 2.28481836869746
434 304 676.0625 723.480263157895 59.5446415687786 2.92394797769414 1.84231114270017 0.0904669471183123
435 713 680.251051893408 100.820476858345 -4.50790463443354 35.4803189649667 -0.139474564283904 1.0977610285925
436 480 681.66875 323.835416666667 -32.6722161055371 -14.1718066051642 -1.0108783293021 -0.438475680313368
437 914 681.757111597374 664.108315098468 -33.7878094859568 -1.61370140167153 -1.04539478722881 -0.0499279195401045
438 508 680.177165354331 514.555118110236 -21.0423727489799 -28.0643212877483 -0.651050989021702 -0.868310068858426
439 332 681.481927710843 133.280120481928 -34.5643023635507 20.2653259062481 -1.06941947598214 0.627009160587632
440 885 692.498305084746 401.828248587571 51.7567657730431 15.1915127554539 1.60135427440035 0.470025387448454
441 569 687.673110720562 47.5377855887522 -21.5085576436434 32.6337067792571 -0.66547474913461 1.00968685079061
442 507 683.885601577909 598.751479289941 -6.42036468034451 -22.208652869122 -0.198646075938415 -0.687135694618019
443 438 689.986301369863 84.8401826484018 16.2425925854151 16.3771364356515 0.502545796197043 0.50670858277098
444 1076 696.720260223048 376.089219330855 35.9785799052629 -24.5708430945299 1.11317722152096 -0.760221857516817
445 599 691.470784641068 290.604340567613 -10.6423725730084 20.3814454770415 -0.329274995355761 0.630601899976468
446 1650 698.792727272727 249.646666666667 -3.87014735226927 94.4915641016515 -0.11974235469604 2.9235688862878
447 784 693.054846938776 344.460459183673 27.8254338118033 26.9060590755159 0.860918890623239 0.832473437323756
448 698 693.492836676218 537.227793696275 9.25439223950928 -9.22175143274058 0.286330885409269 -0.285320978884813
449 314 695.213375796178 118.808917197452 68.8875492090237 -20.1249232877605 2.13138069450796 -0.622665103730642
450 807 704.080545229244 503.2156133829 -30.5953989181788 -17.3787173654694 -0.946621607877348 -0.537697495605196
451 729 697.142661179698 700.654320987654 1.40712618455617 41.678100716079 0.0435364825565141 1.28952038895256
452 915 702.026229508197 475.615300546448 15.6123242751609 16.796508041342 0.483045295391596 0.519683939776081
453 685 699.807299270073 176.148905109489 58.0505349826388 53.3537141865435 1.79608348661717 1.65076385650541
454 890 707.310112359551 217 45.2938644107753 -1.36214006680344 1.4013921135714 -0.0421446121241942
455 643 701.961119751166 13.5645412130638 25.465254645371 -19.0767798661667 0.787894949886869 -0.590235547453613
456 1312 705.974085365854 569.328506097561 -49.6915715113846 39.7682729118147 -1.53745716628359 1.23043031885162
457 613 704.169657422512 725.411092985318 57.1889120127241 -31.9794402751895 1.76942487290385 -0.989443845895752
458 215 695.813953488372 194.623255813953 36.962652040144 -15.4299048397988 1.14362441225966 -0.477401238268092
459 939 706.310969116081 431.091586794462 4.13072307197511 5.16705254576589 0.127804567168621 0.159868599914003
460 923 703.990249187432 625.88082340195 9.57405925576957 51.0310416980331 0.296221382530321 1.57890037234146
461 552 705.686594202899 69.304347826087 21.0838381267555 12.2100956225028 0.652333927763119 0.377780344731578
462 917 713.842966194111 310.725190839695 43.9811690129823 64.0160593972697 1.36077731945039 1.98065680524954
463 1129 707.282550930027 669.161204605846 83.6785565542756 0.67910804347672 2.58901444501836 0.0210116020960396
464 640 710.775 33.3125 30.2145366943176 4.79630369498992 0.934837731102433 0.14839763089089
465 127 698.007874015748 134.094488188976 -25.7840427220302 -7.1313330420289 -0.797758252617656 -0.220643436243716
466 372 704 149.067204301075 40.9711788648543 91.1797391497273 1.2676482276763 2.8211010260261
467 786 721.428753180662 524.984732824428 20.3794504641689 -1.33754023861015 0.630540174280451 -0.0413834934677544
468 655 715.725190839695 104.587786259542 1.53070954135352 53.2809576702738 0.0473601514758587 1.64851276997443
469 1188 724.425925925926 279.632996632997 16.530977073234 109.355632909855 0.511468411923549 3.38346315837919
470 952 721.524159663866 606.878151260504 24.2563871609874 78.5638342730532 0.750492591289154 2.43076494343007
471 1326 721.788838612368 350.582202111614 44.8050062742817 4.76837054924191 1.38626684338195 0.147533379393082
472 581 721.292598967298 52.3855421686747 21.3154538669073 -0.943919133597226 0.659500118501097 -0.0292048569244538
473 433 719.799076212471 83.4572748267898 41.9718562219139 -23.7328924876539 1.2986091839704 -0.734295666689105
474 825 721.900606060606 136.215757575758 -1.11229986864848 13.7652077754985 -0.0344145566762385 0.425895512984009
475 252 716.559523809524 459.115079365079 -14.8489458729564 15.3089793140723 -0.459426368491958 0.473659802639069
476 696 723.010057471264 167.925287356322 87.6523990782214 37.5037401028803 2.71196512820863 1.16036567630791
477 505 721.790099009901 707.780198019802 -1.06370926502063 -64.2987870145017 -0.0329111634550244 -1.98940439740649
478 343 726.571428571429 7.86880466472303 17.3004389488992 22.9724637786482 0.535275561485169 0.710768003293697
479 149 717.798657718121 392.140939597315 -17.4330210145345 81.8347428245489 -0.539377650445769 2.53196685030884
480 980 731.05612244898 192.95612244898 70.3860619593632 9.86910368558431 2.17774467730631 0.305350056854633
481 886 733.41309255079 650.320541760722 20.2968742361502 13.4578207617817 0.627985265879074 0.416384959127747
482 331 723.528700906344 409.691842900302 -32.782509458174 11.8112920146812 -1.01429080550777 0.365441361557247
483 473 725.672304439746 484.849894291755 -7.09678066139161 -56.4951925264715 -0.219574385625932 -1.74796119278487
484 55 722 384.690909090909 6.6894698918413 31.8431492420984 0.206972190877348 0.985227001486269
485 113 722.362831858407 557.442477876106 2.89881053718178 7.24641639922673 0.0896891947373293 0.224204115185079
486 881 732.918274687855 442.963677639047 38.3219387283396 28.0543469920864 1.18568074085296 0.86800146416194
487 722 738.152354570637 548.947368421053 7.51658133218978 -19.5820307747339 0.232563017904978 -0.605868009992454
488 783 734.863346104725 244.432950191571 19.3434702232892 14.3471978794001 0.59848694680094 0.443902286139586
489 999 737.918918918919 581.715715715716 70.6661215434482 11.4527878636315 2.18640972052071 0.354349243529798
490 465 738.376344086022 386.384946236559 19.2146218302511 -5.51484649447855 0.594500377666271 -0.170629344293276
491 625 732.6336 679.9424 89.8484125283395 62.3736979029249 2.77990978186817 1.92984214247458
492 221 730.47963800905 731.47963800905 -26.3365834786044 -10.0672540262808 -0.814853863000278 -0.311480828171364
493 608 739.748355263158 123.8125 -3.21989704747835 77.1398338534802 -0.0996236110022557 2.38670637206124
494 292 735.085616438356 31.5102739726027 -36.6074773220915 -43.200057409551 -1.13263530688537 -1.33660972732488
495 514 739.009727626459 221.303501945525 15.1426257148484 7.5443989095092 0.468512822467489 0.233423693715736
496 1056 747.382575757576 414.116477272727 50.1061869099763 -13.0779088613254 1.55028536624644 -0.404630485357899
497 795 743.362264150943 503.59748427673 29.5835558192179 20.6664123899604 0.915315183541471 0.639418775939438
498 711 744.350210970464 620.090014064698 12.3962849631711 -25.5201547587667 0.383541042720985 -0.789593559333154
499 390 739.907692307692 95.9358974358974 -10.7325366422333 8.5332302741929 -0.332064671555463 0.264018135019139
500 1586 750.069356872636 326.513871374527 21.4099710688295 11.0675345343131 0.662424480621523 0.342429505957009
501 954 744.585953878407 66.1991614255765 0.230254342020038 6.15925857327925 0.00712406908132327 0.190567453281534
502 241 740.842323651452 155.460580912863 -51.9743566157744 -5.42066330764936 -1.60808653482802 -0.167715316599449
503 630 743.526984126984 709.468253968254 -6.79860022997 15.1708808256426 -0.210348683415454 0.469387035563458
504 567 747.777777777778 13.9911816578483 7.30008789778671 -15.2898081912867 0.225864711289738 -0.473066648121795
505 925 750.671351351351 475.727567567568 19.4940746938369 18.7813594118649 0.603146648949117 0.581095238932097
506 1184 769.723817567568 39.6722972972973 7.54526625555499 21.2621586118425 0.23345052940141 0.657851163369753
507 387 747.21188630491 278.428940568475 27.8348591691831 -40.606035504876 0.861210511169896 -1.25635069253212
508 759 751.258234519104 366.059288537549 36.0688449503892 58.2035623774281 1.11597002191494 1.80081815403864
509 817 758.252141982864 204.341493268054 96.0977348698751 -9.77232416891719 2.97326380803755 -0.302355698718561
510 803 759.992528019925 532.762141967621 -11.4243667710354 14.2389788019422 -0.353469894957062 0.440553988005603
511 554 757.87725631769 296.71119133574 34.5107635897083 -32.7034426087635 1.06776298638009 -1.01184447727656
512 509 756.357563850688 107.172888015717 0.19840178591054 -14.0533131724442 0.00613855103137031 -0.434809493639212
513 624 763.200320512821 148.751602564103 29.5124062652139 42.7882804799403 0.913113816421168 1.32386934958909
514 787 760.121982210928 171.454891994917 49.0874149060546 57.0265739919199 1.51876456159892 1.76440213472402
515 630 756.77619047619 680.106349206349 -27.2774906643268 -24.0595455741651 -0.843965530260896 -0.744402312815806
516 506 759.754940711462 445.328063241107 -1.56635104330623 -1.58618304724861 -0.0484628995059094 -0.0490765016854256
517 1102 766.696914700544 239.81941923775 72.6124663940711 -22.9894548744801 2.24662962799463 -0.711293707779493
518 546 759.327838827839 653.117216117216 30.5400446134546 7.17545490110442 0.944908945751874 0.222008566513543
519 492 766.132113821138 557.327235772358 5.14875993162154 -0.493119994660809 0.159302626453095 -0.0152571320763178
520 665 767.566917293233 271.206015037594 30.0877263907508 -21.5759453600557 0.930914220453694 -0.667559725004087
521 484 763.462809917355 575.836776859504 51.9746744080027 -9.13127427589226 1.6080963673192 -0.282521615754397
522 340 763.388235294118 633.25 -5.03369929091315 10.242234891281 -0.15574265035989 0.316894735936295
523 220 762.554545454545 88.6545454545455 -32.0015638672917 13.3409543730032 -0.990128349810335 0.412769113191297
524 702 772.175213675214 392.586894586895 -11.2871574963163 -31.9184106223505 -0.349224640152651 -0.987555588506031
525 754 775.188328912467 723.476127320955 64.117518419477 32.1339736442238 1.98379594728173 0.994225108158653
526 932 772.076180257511 609.697424892704 73.2260746212793 45.9654721210701 2.26561466584951 1.42217165536729
527 345 764.249275362319 704.005797101449 -72.5855730844578 63.9380011033937 -2.24579754902566 1.97824168172542
528 423 768.096926713948 124.862884160757 13.5823443856865 -37.5635744728538 0.420237719910329 -1.16221695164712
529 1031 778.972841901067 14.1852570320078 96.7945947447384 -3.89445192338235 2.99482465177659 -0.120494338098752
530 1185 778.767932489451 69.7721518987342 2.8188258134884 -15.2869453359269 0.0872144674768436 -0.472978071380207
531 624 773.258012820513 463.958333333333 30.4193615483477 31.8126422871587 0.941175011854146 0.984283116334986
532 605 772.700826446281 513.004958677686 54.4715734963662 69.7797005978637 1.68535042228528 2.15898385746825
533 602 778.119601328904 746.176079734219 27.9981260982874 -3.00765941555574 0.866261989771473 -0.093056978910942
534 887 778.941375422773 426.885005636979 11.8030500083059 51.8798058202456 0.36518635388933 1.60516113332144
535 841 786.546967895363 493.405469678954 25.1214320178477 1.96347516464 0.777257078180697 0.0607499193702095
536 832 783.692307692308 697.094951923077 -26.1531362192412 25.8330509237082 -0.809178005003344 0.799274566322069
537 663 786.625942684766 595.506787330317 4.05241660433852 51.201209843662 0.125381765148632 1.5841653745745
538 517 781.851063829787 98.5067698259188 44.0693192013093 -30.7727528451473 1.36350468617739 -0.952108938176891
539 503 780.234592445328 327.453280318091 4.75391646435123 -6.29813147643999 0.147086170022935 -0.194864180748046
540 132 777.113636363636 405.780303030303 66.2680109518484 -14.6706375002736 2.05033218379774 -0.453909507643097
541 247 779.259109311741 137.748987854251 -7.59616445125953 -23.6238999516055 -0.235025319518863 -0.730923437747206
542 899 786.256952169077 189.601779755284 -26.2329844174053 -28.1376831015889 -0.811648508164109 -0.870579883295564
543 412 781.395631067961 662.570388349515 -44.6554070773598 -8.66806661132174 -1.38163824439862 -0.268189971137195
544 786 788.342239185751 304.442748091603 -4.91549450807569 12.2138202628956 -0.152085394512773 0.377895585101114
545 280 781.492857142857 634.382142857143 13.7919795013642 -21.5588667898799 0.426723830151974 -0.667031314062189
546 533 789.630393996248 546.971857410882 28.9814952477879 -28.0523305446978 0.896687430143294 -0.867939075282022
547 746 796.344504021448 125.404825737265 -0.0599793861748006 10.0768694182302 -0.00185576214031812 0.311778328387391
548 1202 794.257903494176 223.197171381032 -24.2801725252342 35.1425135574687 -0.751228510432011 1.0873093296671
549 99 780.959595959596 649.30303030303 -28.0688891745383 -34.2782947510605 -0.868451399270534 -1.06057040077561
550 683 790.256222547584 779.538799414348 13.1751901355851 -2.51164205018041 0.407640367873319 -0.0777102021879982
551 1095 800.265753424658 579.30502283105 -34.2334669928965 16.839991729213 -1.05918342998879 0.521029325029562
552 1362 800.656387665198 163.961820851689 48.3480417453738 32.9767224303995 1.49588835684484 1.02029975464847
553 814 797.937346437346 463.714987714988 -14.1738825230832 -15.7633373505662 -0.438539909211431 -0.487717639773604
554 553 796.021699819168 525.032549728752 77.5622435788951 8.12880911963438 2.39977572848717 0.251505344955129
555 658 802.682370820669 754.987841945289 -2.6731776134578 62.0804017280243 -0.0827081123328521 1.92076755915533
556 609 801.970443349754 672.898193760263 33.3572096023455 86.6987379759755 1.03207202731755 2.68245885478522
557 987 810.211752786221 265.193515704154 -8.08248560035794 -31.1858258334384 -0.250072095321181 -0.964889415966787
558 300 794.443333333333 430.7 26.3393146190905 3.86385949593348 0.814938364483824 0.119547808428132
559 1534 812.153846153846 625.829204693611 61.2200976090701 44.0612299212629 1.89414975068924 1.36325440386192
560 187 795.283422459893 649.748663101604 -4.77384388255194 2.43870430154192 -0.147702724319496 0.0754535083277299
561 265 800.709433962264 692.51320754717 39.3600440890475 -68.0007807252362 1.21779971953755 -2.10394407862389
562 450 807.882222222222 47.4 38.5216344220086 11.7242732868877 1.19185932538891 0.36274900221787
563 609 808.014778325123 67.1297208538588 7.1810020417143 0.431644875992775 0.22218019503773 0.013355091974353
564 700 814.297142857143 734.13 152.131479109265 -8.69892604614657 4.70694779134273 -0.269144762015725
565 447 810.570469798658 99.4563758389262 5.87404517659304 19.1117044461029 0.181742951111084 0.591316113917286
566 1092 816.221611721612 18.7335164835165 84.4348802912382 16.8832975410287 2.6124151005834 0.522369206798091
567 403 808.806451612903 115.82382133995 34.2390192166371 37.5919480661644 1.05935521578503 1.16309483059202
568 550 814.512727272727 505.489090909091 -22.1105950700262 -15.2678354545983 -0.68410178642505 -0.472386811673543
569 545 810.500917431193 709.471559633027 50.2551570845088 -22.4422391256668 1.55489450327776 -0.694362853130964
570 97 803.567010309278 31.4948453608247 15.766547872529 23.6523403200639 0.487816973319496 0.731803382715098
571 377 813.870026525199 201.48275862069 31.0397295433059 31.6939359919239 0.960369196915549 0.980610343694862
572 312 812.092948717949 547.61858974359 7.42706627487663 13.1374427407776 0.22979342213309 0.406472463520726
573 1229 818.93246541904 789.172497965826 -59.40982871893 15.3580537464526 -1.83814003327854 0.475178165521337
574 379 819.408970976253 83.9525065963061 7.05574463306792 2.99348640227086 0.218304730956072 0.0926184658959596
575 464 821.734913793103 250.678879310345 55.0994376913205 17.1650258539165 1.70477653976607 0.531085880479766
576 419 822.284009546539 232.656324582339 12.4472054928398 -9.90275241637704 0.385116523851266 -0.306391148547251
577 682 820.939882697947 571.360703812317 82.5291345748462 107.771446026459 2.5534513302766 3.33444841800109
578 1246 832.062600321027 146.441412520064 38.0978123102046 -8.65938270713273 1.1787462697297 -0.267921291151422
579 846 827.086288416076 535.498817966903 -24.9955903477839 36.8985202169496 -0.773363537051446 1.14164017372266
580 284 824.316901408451 646.679577464789 3.47466864521107 -16.5034090833215 0.107506243947562 -0.510615458346877
581 353 824.331444759207 660.934844192635 9.46843425934316 -13.8229738740847 0.292953345260514 -0.427682796008844
582 675 828.986666666667 684.585185185185 138.321160763072 63.0249498557559 4.27965655735254 1.94999187715759
583 930 835.924731182796 180.730107526882 84.753704730348 -7.87760347361208 2.62227952836837 -0.243733042551705
584 647 834.024729520866 214.403400309119 52.6068461918228 -13.0047120201148 1.62765576159462 -0.402365775173745
585 814 834.169533169533 716.714987714988 -28.9880246175735 -30.4204954584899 -0.896889448837066 -0.941210095032662
586 721 836.425797503467 62.9542302357836 -20.3548699835392 15.6654509460884 -0.629779654237606 0.484689034529924
587 373 831.45308310992 122.991957104558 21.5624590373275 13.5711024141386 0.66714245819415 0.419889893323371
588 709 836.980253878702 754.434414668547 -34.5597113649051 -93.5380886720961 -1.06927743048924 -2.89406835757722
589 984 840.667682926829 98.0060975609756 16.4224897972995 -7.99622907967407 0.508111815729004 -0.247403318668912
590 287 832.965156794425 592.822299651568 -26.3436702840333 -8.96741222168563 -0.81507312875222 -0.277451723982827
591 952 846.949579831933 632.220588235294 42.5277100977646 21.2440023642776 1.31580730225968 0.657289409090656
592 1327 846.257724189902 20.4672192916353 28.2001006386731 60.5383612507647 0.872511081822261 1.87305682853538
593 179 836.787709497207 244.150837988827 -7.15903833808307 -31.2996747709687 -0.221500638072255 -0.968411901965032
594 692 843.494219653179 783.5 -15.6460065874579 17.7738682669364 -0.484087426095918 0.549923464049053
595 509 841.70137524558 274.958742632613 -46.0258143087038 -45.8461222834807 -1.42403864258433 -1.41847897152744
596 337 841.780415430267 599.884272997033 -3.05943237721956 27.7110446995752 -0.0946588342861847 0.857379691620456
597 856 849.139018691589 820.280373831776 35.2901703055448 26.5790377175865 1.09187782928535 0.82235539687979
598 1417 857.601976005646 566.131968948483 68.642394028308 -5.90180298187246 2.12379559349427 -0.182601777574992
599 559 850.855098389982 942.128801431127 17.3072621701536 -4.8880415103235 0.535486671943053 -0.151235998793412
600 1081 861.872340425532 46.6901017576318 -13.3792849201872 52.7358059549571 -0.41395506027776 1.63164577651994
601 400 848.47 238.925 2.39509572887911 -29.7584976743828 0.0741042591389318 -0.92072788434214
602 956 858.372384937239 851.719665271967 4.17903884593518 -17.5465790402293 0.129299457160225 -0.542891135632153
603 466 852.358369098713 541.008583690987 -5.5252683335375 -4.51594771044106 -0.170951795981956 -0.139723417046468
604 194 851.19587628866 199.092783505155 -18.8679234999394 -33.7622447755317 -0.583773531719084 -1.04460381511721
605 162 852.796296296296 885.401234567901 -48.9142773715651 -57.7337131470336 -1.5134076864779 -1.78628101938237
606 763 862.407601572739 898.997378768021 -29.8669955605855 -8.63504968744106 -0.92408480881837 -0.267168427549721
607 657 865.287671232877 218.176560121766 60.0958675328819 -22.2514890067302 1.85936607340523 -0.688461044667102
608 199 856.241206030151 167.849246231156 24.7171909163115 -57.7559435087182 0.764749858956993 -1.78696882674771
609 607 860.387149917628 595.777594728171 -0.3783601443847 -15.8861203598621 -0.0117064624387473 -0.491516545942161
610 849 864.56890459364 143.791519434629 33.5067287472424 -10.2400399171271 1.03669814949132 -0.316826823438459
611 2153 882.964700418021 118.150487691593 7.41136629457621 -58.166671088336 0.229307664760376 -1.79967673759591
612 1389 877.609791216703 196.02663786897 -34.554649079575 -12.5144332410256 -1.06912080338686 -0.387196550303996
613 969 872.466460268318 77.8916408668731 12.4933496224658 69.3884489888374 0.386544223169633 2.1468785331281
614 865 872.865895953757 926.180346820809 25.5176075588136 37.183569850922 0.789514748969489 1.15045960907493
615 248 863.137096774194 656.560483870968 0.523604186045505 -5.57059120719703 0.0162003129232351 -0.172354085641651
616 1054 876.745730550285 622.134724857685 13.6433410001489 10.9064725989412 0.422124955092714 0.337446249859014
617 140 863.5 875.35 7.13363316290882 -25.6824998180546 0.220714601981136 -0.794616515283654
618 634 878.380126182965 166.331230283912 23.7588439309064 10.8556481950135 0.735098604313944 0.335873742859052
619 285 875.698245614035 952.40701754386 23.1704206871768 -32.7134909357034 0.716892789819373 -1.01215537250069
620 527 877.45540796964 16.4914611005693 24.7216756103618 14.8853007009552 0.764888615385831 0.460551186829067
621 656 885.474085365854 241.385670731707 8.07607541106195 -51.3110452589366 0.249873764071622 -1.5875636821987
622 1077 895.52460538533 893.816155988858 16.2156217321361 7.71481790094497 0.501711318027138 0.238696457117749
623 1293 901.734725444702 59.3897911832947 31.4082258349835 42.1031794638777 0.971770471762712 1.30267232492803
624 370 894.918918918919 8.45405405405405 -26.5979597167528 -31.8468518791245 -0.822940843512566 -0.985341561071664
625 907 905.642778390298 28.6549062844542 -33.4405867343002 -48.0709689398847 -1.0346517156858 -1.48731572455681
626 1290 903.853488372093 941.1 48.8525761198385 1.79767966556866 1.51149864981936 0.0556202068167154
627 652 898.579754601227 87.5414110429448 59.7346735152401 4.27154415016157 1.84819073090847 0.132161571168222
628 873 902.137457044674 170.45246277205 -36.3935449678456 -37.2147353821414 -1.12601624008729 -1.15142387057556
629 832 906.481971153846 230.532451923077 51.4394085775718 23.2893157704741 1.59153524313189 0.720571403561938
630 392 901.920918367347 914.864795918367 15.0729174535401 -7.53633934934345 0.466356048941558 -0.233174330933335
631 328 897.134146341463 637.966463414634 -28.5894754814498 5.36872901287933 -0.884558339016781 0.166108469578082
632 342 900.219298245614 866.514619883041 3.40268261791518 -4.86579104516302 0.105278996344556 -0.150547569426547
633 398 909.816582914573 205.623115577889 -15.7539438209757 19.545225159669 -0.487427003978711 0.604729244304032
634 1235 921.061538461538 142.180566801619 -6.56132069545645 -77.8295486123923 -0.203007254886338 -2.40804614592084
635 77 913.688311688312 2.7012987012987 -10.3954663887955 60.1651986747942 -0.32163571829585 1.86151117885748
636 107 911.616822429907 881.242990654206 11.974116547929 -3.93958416367852 0.370479152431525 -0.121890729562401
637 1101 933.292461398728 96.7974568574024 48.8856328987351 -22.2995518152613 1.51252142652098 -0.68994810790862
638 485 923.187628865979 908.175257731959 -7.35282894815349 2.72967489020655 -0.227496519328354 0.0844561380114721
639 1187 932.987363100253 175.786857624263 14.0214196005679 18.278586357637 0.433822706561483 0.565539441203704
640 788 934.294416243655 16.005076142132 43.6393101280704 47.0486772391112 1.35020020593839 1.45568602049268
641 764 929.543193717278 51.1989528795811 -27.3188942872638 -3.03903954998914 -0.845246558307673 -0.0940278802347716
642 670 938.594029850746 117.420895522388 88.4585063035688 -44.5709379099904 2.73690608484792 -1.37902476845587
643 926 934.524838012959 211.402807775378 5.63337462052163 -29.3326388088459 0.174296604378808 -0.907551811524739
644 705 955.110638297872 81.4851063829787 -3.30031609514185 -0.270166444526709 -0.102111776245885 -0.00835894948767686
645 289 943.162629757785 135.78892733564 43.0633766263128 27.3679310877994 1.33238082404629 0.84676375686071
646 59 941.305084745763 2.64406779661017 13.3149366290424 7.78015837476134 0.411964124222618 0.240718091303625
647 639 953.323943661972 34.9749608763693 -2.83803619905907 12.2531112357764 -0.0878088367846432 0.379111247757548
648 508 951.240157480315 60.3641732283465 18.0393247677214 -4.32216686614551 0.558136687882695 -0.133727837943432
649 518 954.911196911197 195.469111969112 20.8076967264608 16.7558019442518 0.643790113150748 0.518424493178211
650 651 957.287250384025 226.408602150538 12.2734525644688 -37.729442711148 0.379740608444251 -1.16734891475209
651 404 960.690594059406 151.834158415842 59.3333954136956 -27.3492446437295 1.83577518690115 -0.846185598302349
652 97 953.958762886598 4.81443298969072 2.69228722659702 26.4554155469641 0.083299363741737 0.818530527060742
653 168 960.910714285714 138.52380952381 15.4786120028442 8.38264871033386 0.478908237837554 0.259359141603883
654 1157 974.018150388937 114.869490060501 4.1887846880972 -61.0530908007006 0.12960099350568 -1.88898256022743
655 720 968.620833333333 177.340277777778 2.64547375744203 -14.6528675358939 0.0818509550591005 -0.453359704965316
656 371 969.118598382749 8.61455525606469 63.1788743567999 -30.7385374238547 1.95475430104557 -0.951050313080848
657 782 975.524296675192 250.918158567775 94.6357678905104 -82.5286413774861 2.92803055135177 -2.55343607075084
658 987 977.673758865248 45.7375886524823 31.0057019127391 17.2741368754592 0.95931638206435 0.534461775362722
659 244 975.741803278689 18.8770491803279 79.6816368164085 -42.6772543028471 2.4653497528555 -1.32043419979557
660 782 978.794117647059 211.410485933504 55.682371721175 -41.5387690028406 1.72281251798957 -1.28520946590277
661 232 976.418103448276 78.6293103448276 -23.3882470829293 -18.9315419980067 -0.723632338257255 -0.585741887977233
662 965 989.575129533679 150.79170984456 72.3671993949324 -26.1561254542876 2.23904106731906 -0.809270491932294
663 447 991.165548098434 89.1431767337808 14.5998265090656 -38.3685235903788 0.451718615655321 -1.18712207643169
664 775 997.423225806452 266.21935483871 -8.21673234845712 -24.5692968678657 -0.254225689555327 -0.760174017265578
665 466 992.37339055794 179.793991416309 -6.88213538464131 11.2173799280258 -0.212933261006376 0.347065722268771
666 512 997.630859375 71.5859375 26.7507705029496 14.5970388265772 0.827668809064425 0.451632364762287
667 645 998.001550387597 15.5550387596899 53.3533107804508 -14.2529559282662 1.65075137512136 -0.440986440278239
668 1335 1000.83071161049 220.077153558052 -36.209204943342 23.6837110925998 -1.12031275993793 0.732773994381832
669 400 996.43 122.365 -9.60580628080845 34.3129922586231 -0.297203635449068 1.0616439416203
670 929 1006.95909580194 48.3369214208827 -17.0444892767489 -38.0746874579502 -0.527356478918716 -1.17803078682714
671 179 1003.17877094972 105.530726256983 4.57339313718238 -68.8838175317762 0.141500778484784 -2.13126523641815
672 544 1012.13051470588 171.996323529412 -57.8464680472441 -33.2230916440686 -1.78976965586718 -1.02792241784036
673 362 1014.99447513812 94.1160220994475 22.2994455355611 -82.9068678226445 0.689944819614816 -2.56513839653568
674 322 1014.69565217391 146.866459627329 -29.2149489130395 31.0461682900425 -0.90391048628178 0.96056841173229
675 195 1014.89743589744 6.66666666666667 17.6810856697556 15.0997372139856 0.54705277059736 0.467185852299367
676 431 1014.80510440835 122.751740139211 -19.8355908733773 -39.0854942630588 -0.613713159157311 -1.2093051482324
677 248 1017.65725806452 198.362903225806 -47.3859728357745 10.3863534105322 -1.46612194587144 0.321353762758705
678 575 1017.04695652174 243.097391304348 51.1099749393696 -10.2775870842337 1.58134256673902 -0.317988532746213
679 148 1017.13513513514 278.033783783784 -3.58783812529314 4.7116691735067 -0.11100770753313 0.145779038892052
680 221 1017.35294117647 24.8733031674208 -34.9228476194915 -22.6204874937883 -1.08051286579487 -0.699877857438766
681 175 1018.01142857143 73.2685714285714 38.1738299895577 -3.83046924603757 1.18109825664279 -0.118514714134169
1 789 28.4752851711027 8.25221799746515 14.8058871156599 -1.35325566069955 0.497856560093594 -0.0455040081624339
2 866 21.784064665127 27.6408775981524 28.5158097114914 -4.54408151539232 0.958860676185418 -0.152797382174102
3 299 6.79264214046823 41.5785953177257 -20.9949896410512 4.25821762839413 -0.705968729887111 0.143185042817187
4 1096 21.4844890510949 61.8923357664234 25.0626145961165 -28.6319111724168 0.842744983282816 -0.962764655292283
5 372 7.48924731182796 89.760752688172 -62.5202637398641 -8.33882293668116 -2.10228020776624 -0.28039776813472
6 185 6.78918918918919 110.459459459459 5.31890618998792 -31.5897055943791 0.178851312219388 -1.06222221193032
7 756 16.0674603174603 127.777777777778 -21.54203879881 -55.8814928081085 -0.724363575785662 -1.87904767644176
8 489 10.4089979550102 153.61963190184 -12.1438128415064 -16.7374693169971 -0.408342765311116 -0.562807134333663
9 240 8.0625 181.904166666667 5.67207336673883 -12.2417970819114 0.190726763813856 -0.411637542347463
10 951 10.7308096740273 211.656151419558 3.34059797619814 13.5813388918793 0.112329548651398 0.456680414307955
11 799 9.80225281602002 274.533166458073 -27.4387378874433 11.0759513072274 -0.92264351006052 0.372435300533128
12 184 5.875 302.298913043478 67.1304605768173 -5.49168459159754 2.25730075605694 -0.18466108639988
13 276543 452.087736807657 819.87799727348 59.6865557082487 -32.1139749366567 2.00699512812805 -1.07985107329269
14 414 15.9565217391304 244.690821256039 1.60537846142281 -2.77200533665461 0.0539817838815585 -0.0932102906558221
15 301 18.6179401993355 167.41196013289 -0.40649689188548 -28.8786467061146 -0.013668694263432 -0.971061281026362
16 852 25.4964788732394 310.903755868545 -8.92071658764856 20.847984844065 -0.299964280370554 0.701025608142831
17 923 28.9263271939328 95.6565547128927 -28.2723765818968 -44.4766356739856 -0.950675095708811 -1.49555272630481
18 603 28.9087893864013 263.703150912106 24.701965127057 -43.5385480327703 0.830617935260435 -1.46400898411136
19 1458 40.9732510288066 195.816186556927 25.4534531019298 8.99564909073758 0.85588715521323 0.302483929340972
20 896 34.5323660714286 228.095982142857 34.0388614759178 13.221095686259 1.14457650200364 0.444567027129856
21 1142 41.5017513134851 152.758318739054 -19.0844243784163 1.38304979457841 -0.641724862426873 0.046505853231765
22 2256 59.9809397163121 261.344858156028 16.8092639416666 21.0272535162307 0.565221270318354 0.7070536214432
23 514 49.5233463035019 112.396887159533 10.5767397409684 -58.8935105850825 0.35564902145406 -1.98032852490906
24 771 49.8249027237354 301.11673151751 24.3249804527597 24.1697082124819 0.817941606467198 0.812720487136835
25 606 48.7145214521452 44.5808580858086 -20.2502203576692 -6.40570726984084 -0.680925429840891 -0.215395630225791
26 495 49.8464646464646 329.985858585859 5.29933623543437 -29.8255434385474 0.178193261122611 -1.00290123403223
27 579 49.8998272884283 76.4231433506045 -26.8823672531924 20.5997184495313 -0.903935224096873 0.692677506323341
28 34380 170.687550901687 88.5690517742874 4.01153162290143 -1.11955325232656 0.134890082497793 -0.0376456288428248
29 730 59.2232876712329 132.227397260274 39.1301692825525 -25.5595662757699 1.31577468629264 -0.859455272361225
30 548 65.3886861313869 96.1751824817518 15.5399918164086 13.4025886133547 0.522541257350048 0.45066983229508
31 203 65.7783251231527 4.42364532019704 31.5562207739184 -0.603389314389258 1.06109626537949 -0.020289316412614
32 186 60.8602150537634 175.177419354839 7.36024094090778 -30.4877923534981 0.247492379732159 -1.0251697387255
33 577 67.6724436741768 194.774696707106 34.7823502573614 -45.5608417955328 1.1695767444279 -1.53200978732988
34 883 74.9524348810872 328.368063420159 20.1448203880397 28.733427527522 0.677381294599027 0.966178201738445
35 719 76.6453407510431 161.36578581363 30.749508564062 -26.139020016952 1.03397009842663 -0.878939741212345
36 1201 82.3880099916736 224.713572023314 11.5060976407049 -11.8322118936936 0.386899221016182 -0.397865002324804
37 734 83.7111716621253 306.431880108992 25.593204808543 8.99132647697457 0.860586387577909 0.302338578940698
38 249 78.5582329317269 143.353413654618 9.31250511255348 -23.0591957305492 0.313138397245118 -0.775378859453396
39 413 85.2566585956417 349.36803874092 12.8178179848127 -3.52655478699313 0.431006580016076 -0.118582454500616
40 736 90.6467391304348 281.07472826087 21.2085872856337 1.94797232592533 0.713151074838499 0.0655017017060024
41 716 91.9525139664805 181.20251396648 -16.6612989494735 -27.158589494926 -0.56024586145213 -0.91322335752762
42 757 102.690885072655 367.927344782034 13.7250056693718 31.0820450595284 0.461511293206557 1.04515183137145
43 150 94.8266666666667 262.8 -38.8972909030555 -4.31877316841936 -1.30794401542294 -0.145221258048065
44 406 101.529556650246 203.869458128079 0.198935400951502 -33.6356134221421 0.00668931848695513 -1.13101705181002
45 804 107.638059701493 245.725124378109 14.8739805301891 -11.5379748062478 0.500146240736011 -0.387971109235966
46 652 107.696319018405 334.592024539877 17.3037075468374 -2.14382817915507 0.581847223934482 -0.0720874686108455
47 237 103.2194092827 303.261603375527 -4.54688381551571 -5.94177560127007 -0.152891611144571 -0.199795658212711
48 745 120.421476510067 178.612080536913 -2.9854443237691 12.033495328853 -0.100387300657627 0.404633274826779
49 1249 122.436349079263 212.783026421137 -3.48081084980544 -41.4476151737523 -0.117044288024302 -1.3937001513852
50 297 117.212121212121 387.484848484848 -1.37655570213095 -27.8588085657521 -0.0462874855985682 -0.936768630782114
51 1068 130.875468164794 269.897003745318 44.9108179266409 -17.0620981254403 1.51015235691608 -0.573722966706036
52 405 117.143209876543 295.587654320988 -2.11239001520155 37.7407017793717 -0.0710303420746717 1.26905303387886
53 511 122.381604696673 321.191780821918 6.25537036204953 -4.07280266409021 0.210340464318919 -0.136950356871176
54 783 127.592592592593 354.835249042146 -9.79748013431025 -13.0054409947932 -0.329445964240395 -0.437315512781375
55 621 134.028985507246 245.359098228663 -14.606263411184 -39.0970998085865 -0.491144097000559 -1.3146627060091
56 704 143.153409090909 396.801136363636 24.6929524653189 5.80728958368154 0.830314879270938 0.195273487702138
57 1032 145.27519379845 297.866279069767 -8.76399075180603 -32.1379181883187 -0.294694283044434 -1.08065617904669
58 707 144.227722772277 371.857142857143 42.3259698564948 -20.5752697927356 1.42323533813059 -0.691855406027958
59 180 133.688888888889 711.027777777778 23.6731654419367 -29.8793396692718 0.796023947864865 -1.00471016355907
60 1210 144.953719008264 639.806611570248 8.21788903626349 28.9934083500941 0.276331295441101 0.974920208009663
61 605 145.218181818182 419.735537190083 14.3131531388855 8.01043863175989 0.481288093726006 0.269355655010413
62 746 144.796246648794 332.878016085791 2.58649447168938 -4.33576979970885 0.0869723799943331 -0.14579277965436
63 492 141.908536585366 550.25 10.3415873997297 23.1863450485508 0.347741887299078 0.779654329175949
64 612 149.410130718954 602.267973856209 7.60249008258748 -16.4405180057314 0.255638147926942 -0.552821973891255
65 739 152.071718538566 224.676589986468 8.79333034086994 -3.14529524179963 0.295680843780161 -0.105762380688752
66 1243 153.830249396621 681.913917940467 13.0332619705818 -4.93604797741203 0.438251009263033 -0.165977482287576
67 1231 157.183590576767 192.333062550772 36.2476655952117 -37.7486843945554 1.21884882436851 -1.26932145395426
68 485 153.098969072165 721.484536082474 34.3149804158508 17.0964288362135 1.1538611618513 0.574877356810297
69 592 156.672297297297 571.371621621622 38.4332848285474 -27.8968700098349 1.29234154146697 -0.938048468962377
70 1125 165.209777777778 272.703111111111 9.12044685389015 7.7230729418216 0.306680326664899 0.259692816656724
71 1291 175.95352439969 447.529821843532 -13.4835468984959 18.7728133461814 -0.45339210168945 0.631246760346006
72 787 167.740787801779 621.74332909784 -28.1117719114715 -11.2154737407493 -0.945274670315295 -0.377126823456846
73 966 168.153209109731 341.14182194617 -2.38048886452897 15.0836015446004 -0.0800453217140901 0.507194869186498
74 719 176.659248956885 552.970792767733 13.5319145442292 -4.60575871407442 0.455018491890626 -0.154871313829275
75 453 168.364238410596 381.498896247241 3.00152813390092 11.0553729591496 0.100928128121923 0.371743341617975
76 423 166.553191489362 404.853427895981 3.20100599564131 -7.92258807584431 0.107635687168207 -0.266401629005164
77 446 168.795964125561 697.508968609866 8.30898920071163 -10.3283952968262 0.279394591422071 -0.347298295171119
78 513 173.43469785575 592.922027290448 -19.3459447369046 -7.69316058510444 -0.650518636488117 -0.258686996275738
79 246 169.719512195122 654.691056910569 8.46238051440667 -5.35821682933883 0.284552463502812 -0.180173155316627
80 792 177.689393939394 317.890151515152 21.0291945884841 14.5708432181779 0.707118891125955 0.489953072422961
81 753 181.43160690571 510.721115537849 -29.7992804396558 1.41817082406914 -1.0020181254293 0.0476868182622701
82 200 172.17 711.505 -5.01399426432311 -28.3828777601182 -0.168598471490754 -0.954390762054627
83 1166 181.246998284734 251.849914236707 -6.0885820243038 -13.2633424944943 -0.204732109517538 -0.445987600612463
84 968 192.918388429752 367.857438016529 -16.9020595615227 45.3039140190608 -0.56834157697289 1.52337044150834
85 670 185.853731343284 640.435820895522 40.9859322430789 -18.8931051672762 1.37817579449098 -0.635291642749189
86 301 178.644518272425 212.564784053156 -30.2541966408118 -21.2152543512868 -1.01731494711037 -0.713375258796275
87 445 185.501123595506 715.058426966292 20.4545749152548 -36.4456411520919 0.687796970619521 -1.22550586754067
88 262 180.736641221374 413.923664122137 6.60031533840912 -23.927208336723 0.221939439646125 -0.804566287862905
89 1190 200.208403361345 429.433613445378 58.1026474230578 3.64858125422224 1.9537352914017 0.122685665388318
90 323 181.009287925697 192.529411764706 2.83147417858586 44.1425051400614 0.0952099650316536 1.48431739289032
91 771 188.740596627756 579.483787289235 31.125532083459 -8.90977000973596 1.04661410782768 -0.299596195325612
92 283 180.565371024735 672.233215547703 -15.3411605836918 -32.6440073682619 -0.515855441580531 -1.09767372188346
93 855 198.812865497076 612.424561403509 -6.28225718934094 -7.4141945646031 -0.211244549514393 -0.249306601689121
94 559 187.361359570662 477.627906976744 21.3073589258969 -12.3218112608746 0.716472328652747 -0.414328065622842
95 721 196.187239944522 544.110957004161 -13.8979388920116 30.8291193542037 -0.467326273334178 1.03664705751842
96 925 196.212972972973 396.728648648649 -16.1092992147556 -15.1568428564509 -0.54168454952584 -0.509657650868527
97 615 196.260162601626 212.349593495935 -17.6110375733182 12.0872230328197 -0.592181374708558 0.406439900101551
98 109 188.623853211009 693.715596330275 -5.59711043345079 12.6978341587772 -0.188206091610309 0.426972054125782
99 1506 200.979415670651 305.643426294821 17.9922073928996 22.3975528417381 0.604998431444563 0.753130732741322
100 1277 205.418167580266 669.281127642913 21.987522456708 25.3131486382046 0.73934322271708 0.851169336069377
101 983 201.021363173957 747.906408952187 -10.6181859356033 -5.01767442704182 -0.357042673839003 -0.168722219101242
102 1035 212.514009661836 350.6038647343 14.0517540557493 22.5965480750481 0.472498397618964 0.759822063126107
103 401 198.728179551122 523.670822942643 -22.1605820225913 -23.2727584307415 -0.7451624512097 -0.78256002937935
104 799 207.171464330413 244.091364205257 26.4676877702077 -15.3367301618003 0.889991385451649 -0.515706466069274
105 650 204.801538461538 486.087692307692 11.4878600533907 10.6281824055936 0.38628597154226 0.35737881095281
106 193 201.181347150259 191.481865284974 -13.4868267644855 2.23616648553982 -0.453502389089755 0.0751923978340973
107 594 203.537037037037 706.441077441077 18.0549513057358 -24.4925850121685 0.607108231983189 -0.823577407196424
108 388 202.693298969072 266.739690721649 -45.8084590075155 -48.3419675659352 -1.54033606000876 -1.62552675787167
109 802 215.224438902743 637.680798004988 35.730830319724 -44.1696018580132 1.20146993782296 -1.48522853578125
110 1025 215.716097560976 576.512195121951 55.5737629452062 4.75828333612085 1.86870008093561 0.160000042899571
111 1085 223.675576036866 456.083870967742 -12.0896914800563 21.1801173537308 -0.406522903074653 0.712193756830293
112 577 215.428076256499 528.083188908146 -9.60609736476342 16.6166116052302 -0.323010607374342 0.55874322352771
113 762 218.95406824147 217.678477690289 1.75648200874232 -5.74089792423902 0.0590627284881713 -0.193041029563645
114 345 216.768115942029 282.292753623188 45.5325083433821 -9.04262050051394 1.53105705853267 -0.304063370296541
115 1435 229.650871080139 390.528919860627 -22.5318541507197 -1.38656637275742 -0.757646692317626 -0.0466241002170234
116 304 218.174342105263 743.723684210526 3.76755011240232 1.18483514115051 0.126686062394529 0.0398407702992209
117 601 222.765391014975 721.352745424293 -15.2585589850688 0.531427406886056 -0.51307791481517 0.0178695554454089
118 882 229.819727891156 684.451247165533 38.9759764971993 0.485495824026961 1.31058986426154 0.0163250792743259
119 643 230.710730948678 519.068429237947 -3.32320230178867 29.4421028153741 -0.111744608988252 0.990007820205562
120 1385 237.612996389892 493.981949458484 23.7186404543164 33.7327985251037 0.797553071588202 1.13428495738534
121 659 227.819423368741 331.349013657056 50.9797994297968 22.1573003735538 1.71422538751733 0.745052103853376
122 526 227.851711026616 613.391634980989 -32.0855709414791 -7.96869112043632 -1.0788959724452 -0.267951870676678
123 212 226.533018867925 268.320754716981 -1.09414641032015 -49.9689894855455 -0.0367913090127908 -1.68023631561491
124 762 243.194225721785 546.538057742782 3.48410632596436 13.3601225724194 0.11715510032562 0.449241886985509
125 1309 243.889992360581 252.53781512605 10.5902718923363 5.82901453169443 0.356104047909285 0.196004001706561
126 600 233.928333333333 307.661666666667 16.5179791704479 38.1049748621825 0.555426650578667 1.28130192801983
127 206 227.703883495146 781.466019417476 -21.6117674750268 12.8141358915402 -0.72670824305281 0.430882767489593
128 1096 241.757299270073 427.286496350365 16.8668655365526 8.07957565524782 0.567158157426963 0.271680427610659
129 207 230.908212560386 764.589371980676 1.78497326808021 -2.61131360619087 0.0600207636437749 -0.0878069378179126
130 745 243.751677852349 605.084563758389 18.4524543431105 -9.99695879737765 0.620474502661075 -0.336153550231765
131 637 239.233908948195 741.830455259027 16.2409275110094 -23.7211641471154 0.5461106274955 -0.797637932225449
132 885 245.945762711864 206.793220338983 -1.94189173063647 -6.40779539438034 -0.0652972381551066 -0.215465844627141
133 524 240.753816793893 709.81106870229 -4.05203360647438 -0.950894691963469 -0.136251985236959 -0.0319743867188799
134 801 245.042446941323 287.283395755306 41.6931427380805 1.46692237368623 1.4019561584471 0.0493261174546787
135 473 239.837209302326 655.955602536998 -7.73827901379657 5.62803842504055 -0.260204129665317 0.189246063304217
136 674 242.409495548961 566.870919881306 30.73055917395 -15.7839507716955 1.0333329141699 -0.530744519021191
137 330 240.172727272727 10.2424242424242 13.9720561746883 10.3466980161493 0.46981851004439 0.3479137347467
138 207 236.666666666667 223.212560386473 -8.15873214673726 25.1716593094576 -0.274342110646208 0.846411675150469
139 989 253.873609706775 641.110212335693 8.74440217032485 60.0199868726325 0.294035605606389 2.01820694483524
140 1121 253.023193577163 790.766280107047 25.4115971849242 -8.12231891351251 0.854479725675427 -0.273117694514061
141 964 248.503112033195 347.624481327801 7.24749409513788 36.0100870323889 0.243701201509746 1.21086010710254
142 282 249.41134751773 769.482269503546 16.0170921979963 5.71071515120676 0.538584034992555 0.192026116276887
143 916 255.109170305677 472.298034934498 56.3620331062196 54.9014286572608 1.8952061232768 1.84609244971334
144 569 255.212653778559 587.391915641476 -44.0155827645629 28.6931269169347 -1.48004955424135 0.964823070282968
145 1062 261.833333333333 709.870056497175 -52.1096694825144 30.5106997523529 -1.75221792476988 1.02594001332678
146 1056 265.067234848485 824.966856060606 47.4856517878798 14.4773785665339 1.59673264210635 0.486810269185688
147 708 258.915254237288 18.9025423728814 26.8417157228973 7.14009069897846 0.902568292762252 0.240089699886331
148 578 259.873702422145 675.038062283737 25.987061038608 -28.9903444648272 0.873830032240321 -0.974817183086698
149 1000 264.853 521.382 34.5815083905515 22.1182197853766 1.16282331991833 0.743737996360569
150 169 255.846153846154 759.473372781065 -5.79652038127733 16.4530307620523 -0.194911367011764 0.553242722595509
151 437 261.54233409611 310.851258581236 4.00852578234417 -19.3355040301762 0.134789009361929 -0.650167561655781
152 1007 263.930486593843 412.399205561073 46.8959204702809 34.5003443747096 1.57690258377444 1.16009413270957
153 415 260.380722891566 746.301204819277 -15.8822273664693 -5.89881292455325 -0.534049126643118 -0.19835101323632
154 748 267.010695187166 233.700534759358 -7.94987441027358 -6.09761208621781 -0.26731914786036 -0.205035750598063
155 698 270.759312320917 448.376790830946 -26.20751719225 -0.594525758310571 -0.881242998545298 -0.0199912741875814
156 1003 274.835493519442 198.914257228315 -13.9899205395366 -4.30298917879189 -0.470419209695965 -0.144690512222496
157 1388 270.023775216138 371.020172910663 59.8272103179218 25.3014594199914 2.01172472113293 0.850776279312673
158 303 265.990099009901 328.386138613861 10.8766394769796 18.3904588721084 0.365733324392287 0.618389868914147
159 177 266.728813559322 570.237288135593 -14.036689847497 -35.355323036619 -0.471991854860501 -1.18884328716729
160 560 274.301785714286 614.796428571429 -5.5370607220801 77.6413248780261 -0.186186885161949 2.6107346775594
161 485 269.037113402062 172.651546391753 22.6522881283273 20.1198803015451 0.761696354816179 0.676542669694375
162 1040 275.754807692308 291.181730769231 19.5820807897492 21.136690301169 0.658458848517627 0.710733496946198
163 465 276.464516129032 149.716129032258 6.80279432248743 -16.6522409999675 0.228747913175405 -0.559941282635114
164 179 269.888268156425 765.346368715084 -4.16192282111882 -7.40208190944605 -0.139947073951799 -0.24889930661906
165 325 272.083076923077 259.030769230769 5.58613825592576 -5.29928407135443 0.18783714576352 -0.178191507075103
166 1165 285.813733905579 553.856652360515 16.2552572894811 -12.0238282808624 0.546592474625705 -0.404308214719183
167 857 281.507584597433 588.584597432906 0.713372334100261 2.75049334432423 0.0239875593773406 0.0924869374100014
168 682 280.862170087977 738.953079178886 40.5561355937442 6.07145706203202 1.36372363234048 0.204156272707371
169 536 276.910447761194 639.429104477612 -16.2606036268274 -52.4863396250648 -0.546772248326497 -1.76488367725031
170 331 279.31419939577 691.555891238671 15.2740157509251 1.23277311128259 0.513597657551234 0.0414527124085583
171 1229 284.356387306753 478.152156224573 33.2394517143794 -16.2332259232312 1.11769588411998 -0.545851657129959
172 63512 702.06006738884 47.8679304698325 1.01311514721501 -3.57288593185465 0.0340665856919644 -0.120140366176273
173 339 278.713864306785 73.330383480826 -33.2586711209502 40.2422584470531 -1.11834214783708 1.35316933084386
174 463 282.015118790497 775.362850971922 6.79565375455681 -3.54453855317224 0.228507807428328 -0.11918716909134
175 195 278.564102564103 661.041025641026 19.3228645238811 -11.8302230098727 0.649742550909976 -0.397798124950301
176 699 284.134477825465 108.71530758226 -11.9222752104454 -1.86687096161135 -0.400893433699324 -0.062774621191283
177 861 287.895470383275 408.97212543554 -0.293848737002137 -24.6359238533102 -0.00988083457944227 -0.828397259044622
178 639 287.58372456964 799.503912363067 -7.55093980741206 -13.8318341387223 -0.253904739960892 -0.465103462581849
179 1050 290.351428571429 336.578095238095 -26.6637913513151 -20.3939728943264 -0.896585482350368 -0.685759192441255
180 494 288.740890688259 710.076923076923 8.29243022080014 -18.2582827061681 0.278837786097744 -0.613945368507832
181 1090 294.733944954128 522.415596330275 18.8568549599385 -16.7839263606972 0.634072708457253 -0.564369279430946
182 438 290.689497716895 159.511415525114 16.2887702762669 -29.9182369445979 0.54771936828559 -1.0060181070507
183 1049 292.52335557674 233.428979980934 -60.3474079758826 -22.2212534902386 -2.0292166697435 -0.747202564574251
184 1131 305.443854995579 667.950486295314 28.683512902987 -10.3121446437539 0.964499793475891 -0.346751857515973
185 798 290.966165413534 845 -5.70648423580121 8.50732018061284 -0.191883849287182 0.286063585899895
186 903 303.915836101883 269.017718715393 9.53766407310284 34.1733316370762 0.320709498165831 1.14909813933253
187 228 290.228070175439 682.491228070175 14.6452926542512 19.3609545569064 0.492456477984198 0.651023350410044
188 527 296.299810246679 68.0322580645161 26.9840038998584 -32.3203573435159 0.907352815416683 -1.08679080168182
189 425 296.312941176471 755.978823529412 -5.62919827782957 -4.25554327256293 -0.189285064028405 -0.14309511604791
190 631 308.427892234548 175.266244057052 -11.5009240952899 19.3391966032134 -0.386725257544513 0.650291726570441
191 405 297.412345679012 190.407407407407 9.49162259242527 6.96084710034735 0.319161326616724 0.234062529698136
192 1230 309.220325203252 108.244715447154 36.6784150295807 23.2739919732693 1.23333302446959 0.782601507963837
193 528 294.80303030303 375.238636363636 26.2953776442203 -70.3778961063219 0.884197357311136 -2.36649766328818
194 980 305.801020408163 593.795918367347 16.3607862293737 -8.44126445350745 0.550140946567632 -0.283842423681497
195 1127 307.007985803017 817.716947648625 68.3948582598595 -65.8412556456917 2.2998168630725 -2.21395049090552
196 661 298.981845688351 294.726172465961 -10.8932996159632 -30.9762957819851 -0.366293531249213 -1.04159595044795
197 775 306.82064516129 642.427096774194 1.64747805584903 -12.2441438253132 0.055397407214267 -0.411716452958378
198 597 303.817420435511 138.209380234506 -55.6178659266967 36.188552518639 -1.87018306932281 1.21686111280965
199 465 301.920430107527 454.060215053763 21.1200362978596 20.9107650324377 0.710173496404884 0.703136628467455
200 688 308.47238372093 621.0625 22.4044759820832 -19.3414351690751 0.753363527359459 -0.650366999648694
201 919 309.531011969532 426.879216539717 27.9030873997672 -43.0303199037339 0.93825753231267 -1.44691951786808
202 432 302.819444444444 729.518518518518 3.17181713169614 -21.744583084727 0.106654194652205 -0.731174245127224
203 661 308.096822995461 780.370650529501 -25.4401510142035 6.61077700588855 -0.855439864781678 0.2222912192959
204 601 308.73377703827 867.435940099834 14.748624416016 -31.0555305603385 0.495931068534482 -1.0442602659248
205 65843 466.732059596312 477.343817869781 2.0812747361559 1.85271193700822 0.0699840727311999 0.062298515759158
206 303 308.458745874587 313.323432343234 -13.4242297032314 -45.5792782610749 -0.451397526520932 -1.53262972419982
207 547 311.72760511883 395.433272394881 12.6321499340233 9.4051041631984 0.424763383889885 0.316252094145674
208 338 308.64201183432 694.257396449704 24.3463696127195 18.4534788990129 0.818660829403162 0.620508953948811
209 713 315.720897615708 206.544179523142 -7.11286730969474 -85.0012223819895 -0.239174297598241 -2.85821550902469
210 490 311.769387755102 366.587755102041 24.9226019052692 1.60195676353342 0.83803697517157 0.0538667273011872
211 390 315.135897435897 84 -4.89515132935253 1.88971337435052 -0.164602308725654 0.0635427105966474
212 217 309.059907834101 709.041474654378 17.1460649980205 8.33022088393196 0.576546401601764 0.280108519111139
213 1095 321.398173515982 339.931506849315 18.027517458373 -44.2456052869448 0.606185752919862 -1.4877841952556
214 947 319.959873284055 245.066525871172 44.7498832784058 -77.9652063654069 1.50474083582691 -2.62162538082668
215 453 313.748344370861 513.618101545254 33.158010493101 -42.1638975134001 1.11495737571729 -1.4177855613905
216 1241 324.634971796938 562.190169218372 33.4538509126079 -20.5348409074577 1.1249051817786 -0.690495961261449
217 334 318.038922155689 761.691616766467 -21.4907437364586 -5.13294969190847 -0.722638749499163 -0.172598416885412
218 1215 336.947325102881 171.558024691358 7.23451771380722 25.8837628287964 0.243264863145061 0.870356569893966
219 153 314.202614379085 743.470588235294 -11.8363620678102 5.79388758507353 -0.398004554341738 0.194822837709115
220 995 337.269346733668 78.6311557788945 37.4579524694109 22.6864246126842 1.25954542398516 0.762844213944299
221 220 320.695454545455 289.345454545455 17.5244858738684 -24.2592155533548 0.589271023506924 -0.815730223499271
222 807 335.257744733581 146.724907063197 10.3476610258231 3.97624255320255 0.347946116506726 0.133703467017617
223 449 320.082405345212 453.685968819599 26.6201937365045 -15.1395583110125 0.895119487211522 -0.509076447981626
224 321 324.196261682243 736.844236760125 -0.955565057858654 8.51176499696294 -0.0321314304867265 0.286213045433188
225 293 320.409556313993 843.597269624573 -5.16085747966769 -11.8249155255285 -0.173536832470044 -0.397619657704283
226 372 326.201612903226 537.591397849462 6.87113511535591 4.0641735481973 0.231045912058267 0.136660197833657
227 223 327.121076233184 685.829596412556 -17.9344790900995 -16.4765035910622 -0.603057283708695 -0.5540320101144
228 1460 336.856164383562 713.019863013699 34.9206714744201 30.250805298531 1.17422787574984 1.01720091125498
229 165 325.993939393939 225.49696969697 -10.4983290747633 23.3413098223471 -0.353012417227203 0.784865109767156
230 386 327.160621761658 305.067357512953 2.67375081500315 -29.7440362228947 0.0899064252554636 -1.00016050653035
231 302 326.794701986755 867.778145695364 31.5444070024982 46.9550477860639 1.0606990204488 1.57889077413503
232 289 333.010380622837 755.159169550173 8.31284641258729 4.4555077586449 0.279524292413371 0.149819038120527
233 1185 342.234599156118 118.033755274262 18.563874425278 14.9260537652791 0.624221067686185 0.501897233533154
234 647 335.132921174652 797.655332302937 57.7634198300737 -26.3775166576922 1.94232856641369 -0.88695932938192
235 965 336.20310880829 371.239378238342 -5.56886289952601 6.82374638780416 -0.187256251863385 0.229452438549938
236 1223 340.543744889616 590.950122649223 -6.30026535851507 -50.2838466753138 -0.211850084670009 -1.69082357162965
237 273 331.490842490843 776.03663003663 -0.117107443939637 -10.8860388108497 -0.00393780587044159 -0.366049382456973
238 656 343.300304878049 821.076219512195 36.9704776688595 6.93320582251196 1.24315380047493 0.233133075664601
239 500 333.91 631.334 1.65955239629647 -2.04697464981589 0.055803413929947 -0.0688307123913059
240 916 340.483624454148 660.825327510917 30.8732794832158 -7.41298978803883 1.03813196752425 -0.249266090376879
241 379 335.269129287599 836.142480211082 -2.99398061963931 20.3475634642514 -0.100674338567931 0.684198648379794
242 252 333.059523809524 521.757936507937 -25.4962286816092 32.5573142362726 -0.857325508942991 1.09475861493048
243 1290 345.052713178295 281.614728682171 1.06642074111118 -73.9323404738603 0.035859017270267 -2.48601792114528
244 259 337.69111969112 853.988416988417 10.2922515625795 -3.00875888567943 0.346082941098754 -0.101171266353305
245 1349 348.20385470719 212.533728687917 25.3374479543637 -53.3159976694629 0.851986414699052 -1.79278141122676
246 1636 355.731051344743 317.762836185819 59.4727804857888 -14.1104794518945 1.99980681201732 -0.474473073198115
247 172 339.122093023256 232.697674418605 1.58416221979141 -110.929171592571 0.0532683754248947 -3.73005787168923
248 711 353.070323488045 390.240506329114 -0.165457445673911 -22.2996695870275 -0.00556360278189345 -0.749839351407646
249 205 345.078048780488 248.10243902439 -3.5413086638231 40.0194754085949 -0.119078562184622 1.34567812168445
250 719 354.948539638387 866.381084840056 33.6047681067119 -35.9173665663495 1.12997986015003 -1.20774232753877
251 952 359.471638655462 683.697478991597 -6.48614072121948 24.8107748537179 -0.21810025177984 0.834276725564382
252 734 353.544959128065 776.594005449591 12.9432283570972 15.1525438008334 0.43522357667814 0.509513092624589
253 1705 364.556598240469 619.412903225806 38.1302550460242 -17.4253959172779 1.28215198889546 -0.58593906612115
254 774 356.239018087855 747.392764857881 1.70658054984085 3.53641112603965 0.0573847629276979 0.118913879629991
255 509 356.121807465619 886.96463654224 35.2612463913223 1.86529456120325 1.18567990528772 0.0627216138112875
256 625 364.9328 839.0928 -30.1713943541595 -21.8778499670253 -1.01453067209338 -0.735655421505051
257 1135 366.506607929515 107.662555066079 -1.56928375492301 28.1688001054282 -0.0527680783956799 0.947192276484372
258 677 364.475627769572 805.322008862629 21.8305892030977 56.8114934288076 0.734066250847961 1.91031948786983
259 844 372.751184834123 242.815165876777 68.1486976823922 -10.7758196609105 2.29153957057587 -0.362343199476076
260 1553 377.065035415325 275.441081777205 56.0244310343004 -14.0326504278218 1.88385405737942 -0.471856027026036
261 478 362.186192468619 371.167364016736 18.5584107870093 -4.94236346965779 0.624037349673695 -0.16618984438518
262 1041 371.760806916427 721.420749279539 -23.300586137822 -8.31863221458503 -0.783495752204612 -0.279718843368506
263 492 366.49593495935 351.825203252033 30.9505723877528 14.450977645632 1.04073098636533 0.48592252287499
264 1291 377.615801704105 203.451587916344 82.6725173727628 -14.5591657127933 2.77991144954418 -0.489560409516929
265 1055 372.272037914692 158.339336492891 -12.2422488232116 -25.3679045832304 -0.411652732411252 -0.853010536547421
266 611 371.191489361702 652.247135842881 19.2444032584679 15.9422115174093 0.647104245255335 0.536066128583888
267 736 377.423913043478 78.8315217391304 29.1301433220147 21.4192877398262 0.979518000916843 0.720236000079044
268 585 376.835897435897 773.870085470085 6.86316446261414 -21.2159744626203 0.230777894226933 -0.713399472958422
269 225 377.826666666667 181.271111111111 12.5410338929994 8.39142804214741 0.421699554049825 0.282166645382412
270 367 375.542234332425 333.953678474114 -1.07624673474436 21.2310338331914 -0.0361894220174803 0.71390585304704
271 741 384.352226720648 883.951417004049 2.90710384380824 10.0017790720906 0.0977530564840273 0.336315634770744
272 483 381.167701863354 850.722567287785 10.8190201518462 -27.9423880040345 0.363795841093804 -0.939579037974387
273 703 393.347083926031 821.843527738265 51.6274884194296 20.2072992976594 1.73600430625892 0.679482184250466
274 906 392.596026490066 697.494481236203 39.2834768488981 -21.6192712746369 1.32092974232007 -0.726960562676239
275 406 388.032019704433 758.07881773399 -10.1026723208205 9.47658127991727 -0.339708228902856 0.318655553740974
276 399 390.105263157895 740.137844611529 -3.90173865459385 -18.0439301260398 -0.131198230121973 -0.60673763840992
277 1357 396.69270449521 666.004421518055 89.3548689600703 45.1780337771674 3.00460940574257 1.51913764520758
278 174 384.781609195402 864.005747126437 12.9827393830874 -0.0201842486596334 0.436552157892595 -0.000678707093148802
279 283 386.480565371025 637.946996466431 21.9446948336153 -43.5993582989829 0.737903118997301 -1.46605376465835
280 1044 392.620689655172 120.329501915709 -20.4909183796185 0.037257459679827 -0.689019040733163 0.00125280373740022
281 967 394.758014477766 794.311271975181 29.1532032529038 -37.69813976048 0.98029340449643 -1.26762186125472
282 1010 397.679207920792 321.256435643564 13.7909593129094 34.251367302223 0.463729022805655 1.15172213393084
283 860 409.16976744186 146.718604651163 16.1895471748827 -2.7839128804176 0.54438293382874 -0.0936106887360382
284 352 399.383522727273 838 25.4204359868086 0.961912892055285 0.85477693552629 0.0323448801012272
285 1138 404.540421792619 248.660808435852 31.1442134729267 9.39011351157717 1.04724228040697 0.315748024771687
286 1016 405.086614173228 171.053149606299 -1.16254686080059 0.0106884425884764 -0.039091313917531 0.000359405094628102
287 162 396.006172839506 222.944444444444 29.6209105239635 -34.9694274479065 0.996020333337745 -1.17586732369743
288 967 416.859358841779 104.403309203723 -25.2588068989377 3.7899018924116 -0.849342063500731 0.127437653989174
289 1444 413.398891966759 626.817174515235 63.4178563370414 -20.0550790391013 2.13246228056643 -0.674363689579372
290 592 406.057432432432 78.9611486486486 45.386832344504 28.4459849556646 1.52615861839713 0.956512778185537
291 1326 417.665158371041 204.772247360483 47.0503155003782 3.77178538582243 1.58209420640261 0.126828475925007
292 1218 414.322660098522 864.606732348112 8.53805468407515 -2.24925998113904 0.287097051443053 -0.0756326742341337
293 1132 414.537985865724 717.175795053004 50.0848951277522 -37.6586510196172 1.68413371020354 -1.26629402939063
294 543 412.677716390424 891.705340699816 -7.45855177615631 14.1387849881687 -0.250798138709951 0.475424863307751
295 1314 417.210806697108 286.638508371385 -12.0283103458803 -70.2168405743551 -0.404458926760584 -2.36108207741327
296 1450 427.00275862069 751.027586206897 -3.39888963174572 -31.7575881221189 -0.114289639450847 -1.06786735950625
297 237 408.084388185654 744.7805907173 19.1463489024991 1.97882483753534 0.643807110542401 0.066539135341719
298 86 404.43023255814 756.337209302326 0.619573814418138 29.7788434579437 0.0208335296332247 1.00133092004036
299 649 420.661016949153 809.892141756549 -15.9517898443757 -33.7539375496102 -0.536388205395474 -1.13499576937129
300 643 425.748055987558 785.149300155521 -24.8680792600306 73.23335366071 -0.836203619534477 2.46251408327137
301 674 426.356083086053 235.572700296736 15.1122260715616 -2.41278402159756 0.508157385543395 -0.08113126514188
302 643 428.587869362364 838.886469673406 31.0103457376396 -12.9571951982381 1.04274089999815 -0.435693219829641
303 858 433.149184149184 136.797202797203 -2.039093194877 14.109480025593 -0.0685656938879391 0.474439466907816
304 622 427.969453376206 71.4565916398714 1.72089898603542 -11.273095700848 0.0578662286672418 -0.379064395357572
305 1606 434.701743462017 666.78704856787 89.9909497638014 -76.5805403557353 3.02599799248603 -2.57506518142299
306 273 425.835164835165 904.56043956044 8.4328176863009 26.5233740851251 0.283558396224546 0.891863870158069
307 540 431.366666666667 307.605555555556 -14.5715397912986 -10.8073592822706 -0.489976495099023 -0.363403737576517
308 406 435.495073891626 266.381773399015 15.9059839641606 -63.3688778935054 0.534847956048862 -2.13081535193411
309 1554 446.041827541828 178.69305019305 -4.54008379404237 -1.98073952520793 -0.15266295647006 -0.06660351782761
310 808 445.320544554455 95.0742574257426 13.3605682635121 -1.52134643330142 0.449256873607558 -0.0511561580928847
311 1137 446.028144239226 705.585751978892 38.3799482341953 -43.9653838923358 1.29054806748032 -1.47836158798493
312 295 440.210169491525 807.823728813559 7.29756145248084 5.0418038330581 0.245384745501742 0.169533584403607
313 272 446.051470588235 855.393382352941 -0.985150898850071 -15.0542018982573 -0.0331262715866484 -0.506206288989851
314 1053 447.979107312441 878.91452991453 -0.803535389822132 -20.9780537374226 -0.0270193445327022 -0.705399250283713
315 755 446.627814569536 631.659602649007 11.7260857487956 17.335614282412 0.394296449017447 0.582920106463769
316 514 454.548638132296 257.747081712062 14.1142547823849 -8.49038532464402 0.474600020880242 -0.285494141524664
317 369 448.80487804878 240.70460704607 -16.2364514458167 14.0038248610542 -0.54596011720171 0.470886750588795
318 877 453.94070695553 770.336374002281 -6.11647756818412 1.51537881179882 -0.205670113394624 0.0509554933512171
319 933 454.575562700965 830.527331189711 12.4346683664976 -8.57667578958434 0.418122951396906 -0.288395708564077
320 949 462.123287671233 208.223393045311 18.6006784006243 -5.28170496376961 0.625458622749285 -0.177600399364817
321 240 449.625 314.3625 -17.4278285957354 -4.24830891715715 -0.586020866348262 -0.142851856642467
322 420 452.621428571429 748.359523809524 -20.9762167852131 -23.2539439442979 -0.705337481697951 -0.781927381336879
323 750 455.581333333333 125.010666666667 2.89171333324795 -9.03313488547986 0.0972355416207992 -0.303744410977565
324 1316 464.095744680851 283.547872340426 25.0709948511042 -19.355036091247 0.843026774227749 -0.650824338562174
325 820 464.915853658537 612.203658536585 9.34845510946968 -14.8913413578007 0.314347236787136 -0.500730008655324
326 424 456.877358490566 798.686320754717 13.3624056628462 18.5750440645826 0.449318657228141 0.624596653300084
327 624 468.751602564103 228.088141025641 40.8961632139983 -0.622320457631324 1.37515725871046 -0.0209258871077374
328 548 461.394160583942 896.768248175183 3.21081273777077 -26.7732441904689 0.107965444572417 -0.900265897685694
329 1044 473.534482758621 159.7030651341 -4.33154923155579 22.2660628206037 -0.145650860597035 0.748709304352922
330 382 458.570680628272 678.94502617801 1.55347613789943 -6.67593952773727 0.0522365380851833 -0.224482346968373
331 618 474.228155339806 320.474110032362 21.8146005094913 -39.6895267333072 0.733528621732115 -1.33458340569729
332 642 473.85046728972 79.5015576323988 -6.12037514225161 -14.7457833697926 -0.205801171588084 -0.495835536703879
333 1048 476.583015267176 642.743320610687 21.030161829976 42.732845613475 0.707151415183326 1.43691677195305
334 483 467.973084886128 702.03933747412 7.91542840514765 13.0664787359348 0.266160880916475 0.439367942305067
335 740 474.558108108108 732.721621621622 35.065913576896 -6.22468668518494 1.17911172586666 -0.209308707849651
336 224 471.611607142857 774.553571428571 1.67314842650072 -17.4823563859117 0.0562605883481729 -0.587854394986877
337 667 476.116941529235 100.227886056972 8.03583501690373 -18.3033429144738 0.270209623222365 -0.615460544203077
338 816 479.518382352941 899.625 -40.8108549649817 -17.050042698674 -1.37228871925239 -0.573317595973878
339 1202 479.199667221298 855.260399334443 -39.586294240922 -8.89546828686359 -1.3311121531376 -0.299115291581242
340 1165 486.775107296137 250.239484978541 -23.2808783659743 -28.9565543558518 -0.782833066921214 -0.97368097103211
341 225 469.724444444444 304.262222222222 -11.3403420793744 -61.4577986102678 -0.381325593922058 -2.06655420023234
342 771 479.447470817121 681.47859922179 -17.0578062319831 6.88620981382501 -0.573578649293899 0.231552807556366
343 397 479.67758186398 783.100755667506 5.37479249879338 -28.0312543071838 0.18073052183654 -0.942567219070769
344 537 479.743016759777 818.899441340782 13.7385480437844 20.5199268241354 0.461966663417601 0.689994466541019
345 387 479.524547803618 188.984496124031 -42.3341171635415 -26.3807775622353 -1.42350929606561 -0.887068979192563
346 251 474.513944223108 135.494023904382 14.8609730947554 21.6203839039046 0.499708858159061 0.726997975482073
347 345 480.608695652174 756.142028985507 15.0386263948011 -0.505534068712955 0.505682553632971 -0.0169988768989971
348 783 490.42656449553 801.173690932312 52.8633718688275 66.8823206309206 1.77756160559447 2.24895690614637
349 965 490.665284974093 124.985492227979 35.185466249649 2.96454803732402 1.18313175397723 0.0996846508800747
350 997 495.537612838516 299.65295887663 -1.54492766507368 -17.5161192074472 -0.0519490907176708 -0.588989689485438
351 546 494.047619047619 717.730769230769 36.6081637488387 32.1347779925947 1.23097078432152 1.08055058814025
352 673 496.306092124814 212.136701337296 -11.9570970458836 14.4121838099666 -0.402064338155908 0.484618057602065
353 721 502.325936199723 620.219140083218 30.8315584128096 39.7401906539796 1.03672907228173 1.33628700947799
354 736 501.506793478261 339.688858695652 -16.4574906873803 -27.1427244608603 -0.553392690176965 -0.912689886535708
355 628 497.512738853503 676.700636942675 -8.68795483437355 12.386509425317 -0.292137531125364 0.416503579007622
356 824 506.379854368932 155.711165048544 -0.219488980178475 -9.38455360157543 -0.0073804445351018 -0.315561069566216
357 442 506.391402714932 871.961538461538 -8.43982989572127 -0.440520858143119 -0.283794185842108 -0.0148127699050633
358 191 498.125654450262 73.1361256544503 33.0195925968663 -3.88200258319042 1.11030299350186 -0.130534593249564
359 965 510.064248704663 191.482901554404 4.22401784654695 44.5445248807257 0.142035055274166 1.49783554034163
360 1563 507.68905950096 763.962252079335 43.0300984235353 17.7586672417539 1.44691207046767 0.597145508118533
361 641 502.714508580343 844.847113884555 19.1064548362339 22.8477473915096 0.642465649376055 0.76826878615016
362 193 497.466321243523 887.99481865285 -5.73650391967294 2.65953670157989 -0.192893278606123 0.0894284674297418
363 809 516.719406674907 657.404202719407 41.5280996197876 -9.12295398756901 1.39640648766422 -0.306764630492106
364 602 509.56146179402 696.895348837209 -19.952610043536 -38.3007454743184 -0.670918110044024 -1.28788482864335
365 877 517.435575826682 728.229190421893 48.9304619032759 30.1857858387912 1.64531522202341 1.01501459412908
366 371 506.625336927224 58.4716981132075 -24.8025647463719 -4.99858408786746 -0.834000655932801 -0.168080295350364
367 788 507.706852791878 99.9124365482234 -26.9023788707738 -31.8295778832394 -0.904608126369676 -1.07028805706752
368 2346 524.76726342711 283.369565217391 38.0437891527195 8.43540143759463 1.27924452297533 0.283645276363586
369 656 515.870426829268 639.25762195122 11.3455389798649 -29.1974378375689 0.381500342721717 -0.981780818116868
370 848 513.725235849057 822.051886792453 7.29079592757039 78.6267693739045 0.245157250794209 2.64387082151678
371 581 515.810671256454 903.648881239243 5.92106207805502 4.91425141744632 0.199099153954998 0.165244560289615
372 885 516.531073446328 241.457627118644 -43.224381829995 3.60313242244698 -1.4534449629359 0.121157422003024
373 745 529.118120805369 887.036241610738 18.2282756247957 -0.558107646680267 0.612936362955259 -0.0187666940162122
374 664 519.421686746988 135.161144578313 11.8038314852748 0.282030391745429 0.396910694595786 0.00948343585084599
375 920 526.939130434783 332.423913043478 46.8761240221736 68.0344329813668 1.57623691670027 2.28769735358824
376 750 527.477333333333 859.846666666667 2.8162775002272 0.979037153538671 0.0946989678888693 0.0329206933469762
377 539 525.170686456401 176.981447124304 3.14316286673445 2.63329150120829 0.105690678337756 0.0885459573123878
378 551 528.800362976407 791.039927404719 18.1818177545798 -18.9041471328427 0.611374190065903 -0.635662935259437
379 2179 542.547498852685 212.907755851308 43.355726634275 2.86709606059725 1.45786150832316 0.0964077715192834
380 480 529.575 359.385416666667 37.2421616498841 3.88220846549723 1.2522893322515 0.130541516161799
381 483 530.944099378882 671.859213250518 30.1755107062716 -83.6157087703736 1.01466908682575 -2.81162680851295
382 304 526.134868421053 702.894736842105 -43.0599469359796 -5.54023128638354 -1.44791574404787 -0.186293497229523
383 668 537.558383233533 111 -24.7597938309358 -22.4629481447627 -0.832562459040935 -0.755329687816135
384 1017 541.56145526057 623.040314650934 -6.94627127140148 -43.1477526067471 -0.233572408977722 -1.45086826076393
385 462 532.777056277056 765.967532467532 34.449604085661 -1.26674095272938 1.15838796099783 -0.0425949008208026
386 376 532.132978723404 819.031914893617 -17.7434622639645 6.10167473989607 -0.596634231902568 0.205172359689387
387 426 538.80985915493 745.363849765258 -15.3109269423001 -4.28974893765669 -0.514838817815621 -0.144245301418518
388 618 544.288025889968 134.368932038835 17.1639744317272 19.5249179741125 0.577148616719899 0.656536715616311
389 261 540.83908045977 845.92337164751 -4.16248323853897 12.5463671006368 -0.139965918313291 0.421878886256528
390 698 544.511461318052 159.25787965616 19.0315821973808 -17.5839650160358 0.639948013375368 -0.591271044234183
391 723 552.546334716459 684.193637621024 -7.92179020457177 27.5939843681419 -0.266374800119868 0.92786376321006
392 351 542.732193732194 381.239316239316 -5.54810583714547 -7.93023231929923 -0.186558283575926 -0.266658671134505
393 459 543.43137254902 701.248366013072 -14.0978559010727 35.530380182965 -0.474048598964374 1.19472968546405
394 681 549.562408223201 805.653450807636 19.995568167971 -37.7981212953382 0.672362601947293 -1.27098379847797
395 248 543.790322580645 904.068548387097 1.53344620752707 -3.67379725694194 0.0515630200341407 -0.123533568136412
396 1085 560.44331797235 329.600921658986 24.9555885407041 10.3304977704896 0.839146169961346 0.347368992070101
397 607 552.411861614498 725.578253706754 6.83499174103818 27.927010335155 0.229830570088723 0.939061954920142
398 1511 563.751819986764 764.250165453342 30.7978925082024 -14.2403767526321 1.03559703667122 -0.478840945437413
399 1572 565.328880407125 364.835877862595 41.8165597615138 17.2190979366708 1.40610612759542 0.579002176613822
400 639 557.408450704225 858.120500782473 12.040362440828 -36.1948209650885 0.404864185458404 -1.21707189296501
401 879 560.440273037543 829.356086461888 -18.6894714361681 23.7772397508893 -0.628444340179844 0.799523506995939
402 192 548.588541666667 289.34375 -34.8494020647274 18.245792764729 -1.17183140042402 0.613525386967244
403 964 563.354771784232 659.485477178423 43.2913993299507 0.590349170051886 1.45569846532541 0.0198508339797673
404 700 562.682857142857 886.635714285714 -18.4513821250655 14.3301592622415 -0.620438448706092 0.481859934508552
405 733 561.06412005457 270.369713506139 52.2938414676934 34.4627217955049 1.75841081482034 1.15882905161592
406 960 566.11875 302.9 51.2483582925553 0.717072159215766 1.72325583537575 0.0241119681473497
407 294 558.503401360544 908.741496598639 7.44893682213768 -37.342388787616 0.250474830292442 -1.25565952801414
408 928 572.644396551724 603.578663793103 -11.3943527550332 2.27923417691735 -0.383141734284455 0.0766405739894937
409 1038 573.421001926782 633.564547206166 -4.13375847227179 -48.8703387606353 -0.139000031351465 -1.64329354640592
410 821 570.429963459196 222.373934226553 11.4445670037456 19.1253852397671 0.384830217584127 0.643102195198037
411 284 561.693661971831 122.922535211268 -5.75029856425573 -89.7530963334287 -0.19335713154827 -3.01800003263892
412 1112 573.226618705036 163.098920863309 29.0723660863837 15.9926710857478 0.977575207786091 0.537762860898579
413 752 570.898936170213 250.706117021277 28.5557463886428 15.3729052708407 0.960203570167578 0.516922875137312
414 664 571.888554216867 707.905120481928 30.2336229964956 13.9137817030213 1.01662314636194 0.467858997062914
415 309 575.95145631068 783.919093851133 27.2213754548259 -6.46669849536957 0.915334571923202 -0.217446495634964
416 457 574.730853391685 795.45295404814 62.2838251185358 -59.6832360681176 2.0943298216956 -2.00688350329913
417 870 578.485057471264 100.877011494253 36.7264546278363 -66.3337098601346 1.23494838388365 -2.23050955010211
418 1086 583.866482504604 129.740331491713 27.6501492201021 42.6623767861369 0.92975233900269 1.43454721667424
419 769 579.893368010403 195.646293888166 3.79518103381702 -30.1847523159836 0.1276151681874 -1.01497984132394
420 229 573.454148471616 738.593886462882 -4.97194934433325 28.1162764627029 -0.167184686617748 0.945426138468695
421 760 581.972368421053 872.588157894737 9.1407434117002 -2.04249160152257 0.307362810218509 -0.0686799672866991
422 539 585.660482374768 810.283858998145 50.204110754886 -50.5211998812101 1.68814240495925 -1.69880471113798
423 935 587.390374331551 675.438502673797 -16.3298278164186 -27.221264689914 -0.549099951937632 -0.915330847388658
424 531 584.937853107345 838.058380414313 25.6470811584236 -4.26886114648625 0.862398011157934 -0.143542937299513
425 1054 597.57495256167 726.201138519924 -39.597608124003 14.9877788319501 -1.33149258903232 0.503972774777277
426 771 592.05317769131 294.98962386511 -21.9574692720478 23.3902229066911 -0.738332666914656 0.786509840658649
427 414 590.958937198068 323.335748792271 9.9888107759603 -21.726175651406 0.33587956827562 -0.7305552844826
428 991 598.307769929364 347.227043390515 28.6978090576361 -33.0406203524644 0.964980509985518 -1.1110100640061
429 292 589.97602739726 747.270547945206 -23.4092753399556 26.7240815456845 -0.787150489801275 0.89861277517934
430 771 604.814526588846 268.243839169909 7.99597375030693 -9.64434329520409 0.268869264963935 -0.324296649015618
431 525 602.645714285714 594.88 -34.8415640388232 49.0360716313227 -1.17156784224719 1.64886641051398
432 278 591.658273381295 893.294964028777 16.0493630445557 -21.6251953290385 0.539669160965342 -0.727159762448811
433 721 594.692094313453 243.001386962552 42.5607293339124 -4.05021861862668 1.43112926201125 -0.13619095521563
434 462 600.311688311688 577.108225108225 16.5759226946972 -27.4117862239761 0.557375035260862 -0.921737244710949
435 712 604.186797752809 697.032303370787 -23.8934777467966 -43.5913938202169 -0.803432077170932 -1.46578595443054
436 419 595.885441527446 855.496420047733 -19.9757416925407 -8.50424021392505 -0.671695925186936 -0.285960020229806
437 291 595.233676975945 208.577319587629 -13.0873573430638 5.99195312795266 -0.440069997605339 0.201482906712787
438 571 596.936952714536 386.15411558669 -7.18026884234067 -0.616812098343529 -0.24144071331018 -0.0207406653249858
439 267 594.501872659176 173.689138576779 -26.2478246493789 7.36815827517109 -0.882598360219715 0.247758604698664
440 171 594 609.672514619883 -16.2353997948984 -24.4135521065948 -0.545924754828315 -0.820919879809124
441 860 602.337209302326 776.873255813954 18.0444841856188 35.7565412974863 0.606756268985307 1.20233448439456
442 619 603.465266558966 89.2600969305331 16.9855614411162 -48.0515668481781 0.571149376209165 -1.61576186494348
443 915 609.403278688525 644.033879781421 -16.2039567160146 -5.02582090250144 -0.544867463024756 -0.16899614907366
444 480 610.1875 618.952083333333 -24.5815650036942 -57.5502733834698 -0.82656941113054 -1.93516139325659
445 390 603.820512820513 823.958974358974 -15.869064239628 -71.8311711193285 -0.533606508852094 -2.41536488030756
446 754 613.494694960212 154.393899204244 20.2652755065509 8.95928113623976 0.681431667972752 0.301261035732336
447 281 605.508896797153 186.163701067616 14.5955878981244 -6.04006975384147 0.490785126668853 -0.203100856225787
448 449 611.603563474388 671.369710467706 -2.02133401260675 24.1216334422728 -0.0679685310616879 0.811103945045394
449 696 612.067528735632 131.704022988506 5.51995013852759 -18.035256701861 0.185611531844576 -0.606445989480533
450 806 616.589330024814 240.222084367246 55.4297491409076 22.1368571991192 1.86385753305895 0.744364690230544
451 900 616.728888888889 520.228888888889 -12.0776023966596 27.2642611211495 -0.406116400618734 0.91677662738036
452 728 618.659340659341 411.887362637363 8.68977265076666 -42.7977627109954 0.292198656258177 -1.43909964708983
453 692 614.78612716763 492.307803468208 43.2575371533862 -15.6997622472964 1.45455982995625 -0.527913630954216
454 806 614.660049627792 886.502481389578 22.7577381792532 -4.22021781675647 0.765242174070746 -0.141907277063717
455 734 616.074931880109 751.243869209809 3.64171752432138 -10.7686746917862 0.122454868480901 -0.362102945736301
456 1046 619.037284894838 846.791586998088 -9.09505386535794 -21.5719088507964 -0.305826472665987 -0.725367973645486
457 798 619.796992481203 318.377192982456 26.9349718072405 -0.332304766576898 0.905704082802809 -0.0111739409262209
458 642 624.280373831776 372.160436137072 27.0344641567155 38.9258530838158 0.909049570883215 1.3089044353526
459 763 620.102228047182 293.036697247706 24.9381660214976 -2.86791809363507 0.838560327626296 -0.0964354128579816
460 797 622.90338770389 813.203262233375 57.3812225796233 5.25001368209155 1.92947696171752 0.176534761598033
461 743 622.476446837147 198.111709286676 8.0556525810661 21.7341874332583 0.270876000336161 0.730824685304182
462 871 623.483352468427 563.179104477612 12.7939023141032 26.9883161924451 0.430202401687635 0.907497818761404
463 293 618.215017064846 219.744027303754 -6.65122147698791 4.55178156931278 -0.223651188144713 0.153056300962786
464 669 627.405082212257 174.565022421525 7.74743852453195 -18.4995678566255 0.260512123537702 -0.622058721937451
465 775 626.686451612903 392.114838709677 23.7387911475477 2.15848025802303 0.798230650360569 0.0725801532792102
466 890 627.526966292135 707.015730337079 3.09573775084489 -17.2775616520356 0.104095981250416 -0.580968053024633
467 964 625.010373443983 92.5715767634855 25.426825268297 -5.6116200406321 0.854991778830066 -0.188693985585399
468 668 626.952095808383 791.053892215569 21.2931705016184 68.1451351016032 0.71599523463945 2.29141977672611
469 691 631.325615050651 592.736613603473 -12.7118417733264 13.8649802354368 -0.427443068306837 0.466218019349837
470 607 630.943986820428 356.204283360791 -27.1009472016385 26.3679728083416 -0.911285101911606 0.886638411900201
471 981 643.554536187564 618.743119266055 50.5914153089216 28.4295914053373 1.70116574570706 0.955961535527132
472 504 628.791666666667 670.160714285714 0.365020322111073 18.2993749219404 0.0122740204967701 0.615327118147772
473 1121 641.909009812667 123.987511150758 26.2228608964349 -12.8276790368614 0.881758939516946 -0.431338163622889
474 517 631.820116054159 636.471953578337 -13.0580159326469 -10.9009660288697 -0.439083375625558 -0.366551318839249
475 955 643.978010471204 337.680628272251 7.60649680095537 6.26097630873517 0.255772876160942 0.210528967534645
476 750 645.270666666667 548.993333333333 40.7962006867375 7.92239812991898 1.37179596062872 0.26639524196302
477 696 638.73132183908 770.255747126437 -18.5850457225028 9.20541638071227 -0.624932964861054 0.3095374763923
478 220 627.513636363636 446.895454545455 -87.0406601687453 -22.1813241098273 -2.92679279001484 -0.745859915949219
479 651 634.68356374808 866.511520737327 12.1159969887043 -70.8660919704255 0.407407441092855 -2.38291353297947
480 574 637.684668989547 228.174216027875 -22.7036978870074 -0.284803860009596 -0.7634250378334 -0.00957669533328973
481 766 638.603133159269 278.584856396867 -17.5632961340033 33.8877151822187 -0.590576041062181 1.13949412002517
482 247 633.797570850202 65.1174089068826 -31.2873404993476 3.72083201997375 -1.05205500986206 0.125115139382019
483 354 637.206214689265 429.30790960452 -9.98653279141856 -19.6329207780335 -0.33580296972134 -0.660168372674112
[truncated: 7,010 more rows]

## Sheet: polarity_tensor (Fig1D-wtcrsh)
1 407638 395.207085698586 604.607350148907 -0.00133595094196862 0.044832799869168 -3.64649595289426e-05 0.0012237172649389
2 1092 93.7857142857143 459.923992673993 0.0703520294576226 0.0143951806403924 0.0019202680475459 0.000392918379690065
3 357 90.0364145658263 433.459383753501 -0.07307219514841 -0.0609038331430801 -0.00199451533366287 -0.00166237826626126
4 647 100.528593508501 358.12828438949 0.0995929851507236 -0.0150824227820299 0.00271840384163823 -0.000411676745805266
5 913 107.318729463308 385.595837897043 0.0114172745385559 0.203967937329614 0.000311636034603018 0.00556733211248484
6 914 111.024070021882 496.635667396061 -0.0427153498268378 0.0448983441854192 -0.00116592118300767 0.00122550630581186
7 273 101.369963369963 258.413919413919 0.109656403296001 -0.124638338025731 0.00299308618502551 -0.00340202009601164
8 558 113.643369175627 306.978494623656 0.14472856294329 0.0942848525519782 0.00395038547046665 0.00257351765285178
9 382 112.756544502618 432.895287958115 -0.0728328977571464 0.00144926379101806 -0.00198798367938299 3.95578488895415e-05
10 785 119.898089171975 334.364331210191 0.0723753038487124 0.0885785228861152 0.00197549359248867 0.00241776262189392
11 786 124.143765903308 249.304071246819 0.221152777589035 -0.061258595541771 0.00603639462435201 -0.00167206155335232
12 202 114.336633663366 267.252475247525 0.178716927199047 0.298015017544708 0.00487810241583205 0.00813435973761986
13 801 120.476903870162 527.735330836454 0.140517865096737 0.0523562967307598 0.00383545390992828 0.00142907211739315
14 1235 125.548987854251 462.848582995951 -0.0227657758928781 -0.0716466305473166 -0.00062139489594991 -0.00195560435733004
15 763 129.70380078637 360.853211009174 0.0682419106588293 -0.00616655695562223 0.00186267207288692 -0.000168316996347434
16 987 132.47619047619 399.026342451874 0.021426255112922 0.0931784969974434 0.000584832497215942 0.00254331953011137
17 739 131.036535859269 283.443843031123 0.0314506360101092 -0.125663796480032 0.00085844931369873 -0.00343001012158819
18 598 135.347826086957 426.807692307692 0.0870811685095823 0.0803476146510353 0.00237689213404479 0.00219309888144522
19 498 136.14859437751 309.963855421687 0.160929935817416 0.129258147043389 0.00439260410859849 0.00352811840064859
20 928 143.046336206897 504.186422413793 -0.0124438539438378 0.0163706300296365 -0.000339656656686408 0.000446838534815006
21 692 152.46676300578 271.281791907514 -0.190907652405589 -0.0646734593067951 -0.00521084988979988 -0.00176527071626137
22 926 149.989200863931 542.098272138229 -0.191613429961445 -0.0843565584623941 -0.00523011418252368 -0.00230252353862581
23 507 149.587771203156 332.39842209073 0.0397287525999759 0.0752097875892322 0.00108440161250137 0.00205286120505324
24 521 149.969289827255 447.548944337812 0.0104602777642885 -0.0647926399398192 0.00028551467973383 -0.00176852376756987
25 485 153.717525773196 246.958762886598 -0.355027609907909 0.259291429717274 -0.00969052606667737 0.00707739423193889
26 669 157.910313901345 350.370702541106 0.0120824146103628 0.00123220922171052 0.000329791121767951 3.36333154080139e-05
27 828 155.105072463768 476.13768115942 -0.0249403405887435 -0.0792161932632986 -0.000680749929983535 -0.00216221658343718
28 613 155.327895595432 376.915171288744 0.123882127113332 -0.0568717474913651 0.0033813792180799 -0.00155232194945492
29 711 161.732770745429 569.535864978903 -0.00264512832864839 -0.066527290087495 -7.21991312876281e-05 -0.00181587127521013
30 729 158.03840877915 306.366255144033 0.0518075601431864 0.0938423325818354 0.00141409427888926 0.00256143901111795
31 498 160.176706827309 419.461847389558 0.0447901548406371 -0.11104344035413 0.00122255326318507 -0.00303094554692338
32 598 166.19397993311 397.874581939799 0.00403194027417563 -0.000298822200055955 0.000110052348706964 -8.15639189215521e-06
33 271 162.619926199262 524.575645756458 0.160334700554292 -0.1263182931416 0.00437635708253029 -0.00344787469544801
34 680 169.772058823529 914.688235294118 0.0842857640180475 0.172044280748888 0.00230059119480474 0.00469597163908553
35 1044 175.92337164751 443.805555555556 -0.000418869102853114 -0.0381114243444591 -1.14330881498956e-05 -0.00104025642158924
36 786 182.796437659033 270.486005089059 -0.0744402240599141 0.0126282291575439 -0.00203185586565793 0.000344689202788755
37 452 174.537610619469 291.911504424779 -0.131393970174844 0.312630942984805 -0.00358641597850328 0.00853330337612339
38 426 171.272300469484 503.105633802817 -0.148662203524893 0.0148386728851469 -0.00405775471592577 0.000405023559789374
39 603 176.890547263682 587.928689883914 0.147954843200981 -0.0669937682511371 0.00403844722133633 -0.00182860385903785
40 581 185.013769363167 902.068846815835 -0.00344238282443387 0.184962926528157 -9.39602993139373e-05 0.00504858780238239
41 323 173.117647058824 543.157894736842 0.160991517475485 0.131566318717359 0.0043942849881867 0.00359112025500794
42 585 178.85641025641 322.516239316239 -0.281617615541647 0.0759708190871503 -0.00768679045821181 0.00207363366151107
43 543 179.605893186004 373.062615101289 -0.251643190678136 0.147830580930756 -0.00686863452507505 0.0040350554660612
44 796 182.315326633166 484.571608040201 0.0274433082294574 -0.325458643376126 0.000749068766292291 -0.00888343717290012
45 832 189.074519230769 522.128605769231 0.0137693928455 0.258921856078074 0.000375837418183476 0.00706730667005843
46 333 181.684684684685 349.561561561562 -0.330972791951677 -0.035706169471574 -0.00903394659531032 -0.000974604668339007
47 834 192.330935251799 413.014388489209 -0.271156393931255 0.226629118258376 -0.00740125001607242 0.00618587207490867
48 935 194.245989304813 553.778609625668 -0.0145749560073906 0.0121441837594223 -0.000397825372361691 0.000331477118947813
49 216 188.449074074074 392.337962962963 -0.375813779388837 0.102529485787833 -0.0102578873410119 0.00279855601903114
50 579 194.333333333333 935.618307426598 -0.104593995087228 -0.0585760063926674 -0.00285490707630773 -0.00159883992396322
51 376 195.188829787234 463.369680851064 -0.128479727854751 -0.0353807329350181 -0.00350687134484845 -0.00096572183457472
52 688 200.254360465116 594.311046511628 0.158333848371362 -0.113152903340387 0.00432174355475627 -0.00308852362109154
53 684 205.592105263158 492.330409356725 -0.280618533684947 -0.179266169480112 -0.00765952038539238 -0.00489309405730738
54 376 209.242021276596 921.757978723404 -0.097917464482351 -0.0102444271833252 -0.00267267028103901 -0.000279623009275086
55 733 214.583901773533 573.197817189632 -0.116117955904105 0.120761539494754 -0.00316945512713758 0.00329620236192208
56 369 212.79674796748 531.70189701897 -0.258510452693101 0.0856647334729723 -0.00705607735967595 0.00233823035039483
57 1276 236.626175548589 907.902037617555 0.0134304145367387 -0.0781120475285555 0.000366584959936802 -0.00213207877802336
58 997 221.259779338014 637.844533600802 0.0128314535914756 -0.00579396505716476 0.000350236240876616 -0.000158147050677092
59 732 226.393442622951 948.136612021858 0.0557187345545422 -0.139881490803619 0.00152085030722857 -0.0038180839885376
60 818 225.944987775061 503.121026894866 0.00469373749942715 0.00373886588222452 0.000128116192428353 0.000102052844005303
61 1110 233.173873873874 600.490990990991 -0.141622700939555 0.0481564452786347 -0.00386561055193426 0.00131443661064045
62 1413 246.759377211607 531.101203113942 -0.185165373781672 0.164800137487516 -0.00505411362722687 0.00449824178048868
63 471 231.6008492569 931.864118895966 0.0550627389309061 0.0373042055215775 0.00150294481899874 0.00101822327592298
64 1776 247.824324324324 569.800112612613 -0.0449105895952403 0.195287159992014 -0.0012258405459097 0.00533038913475177
65 669 236.076233183857 705.775784753363 0.15188768511635 -0.0461175504165936 0.00414579466709383 -0.00125878470285517
66 679 241.270986745214 682.477172312224 0.115819894306678 0.0703283285395675 0.00316131949599584 0.00191962112781963
67 1058 246.154064272212 873.817580340265 0.039749414764278 0.222549145868842 0.00108496558903777 0.00607450868319287
68 735 248.046258503401 625.87074829932 0.0404266704922979 -0.120957889461317 0.00110345137465846 -0.00330156176050426
69 623 247.614767255217 659.653290529695 -0.338944910987584 0.126295768203454 -0.00925154664997692 0.00344725987425056
70 258 241.751937984496 726.364341085271 0.277980001091675 0.0403360884147446 0.00758750128558346 0.00110097892474412
71 124 241.645161290323 771.217741935484 0.0847178837637607 -0.0294235800651064 0.00231238596102263 -0.000803120550736442
72 753 256.057104913679 818.119521912351 0.233696475116955 0.117552223985914 0.00637877652501139 0.00320860366613988
73 1045 265.202870813397 845.977990430622 0.359464035364738 0.0616662284545586 0.00981161889250977 0.0016831879481925
74 550 262.867272727273 652.778181818182 0.328988097670448 0.277035879010246 0.00897977409962294 0.00756173134717617
75 496 256.040322580645 751.997983870968 0.197397480994561 -0.158860459748419 0.00538799062858923 -0.00433611748268176
76 209 253.789473684211 934.272727272727 -0.148429681010841 -0.182174162569794 -0.00405140798282494 -0.00497246811738285
77 878 267.052391799544 723.249430523918 -0.259554082173984 0.0542775458779757 -0.00708456336585184 0.00148151286966733
78 561 267.563279857398 610.071301247772 -0.00253809024561683 0.0688982279642674 -6.92775125041947e-05 0.00188058634146454
79 1574 283.048284625159 549.473951715375 0.178904598312014 0.0723622157952991 0.00488322492394525 0.00197513635232136
80 934 269.143468950749 692.615631691649 -0.200377942399636 -0.221487643046328 -0.00546934272101972 -0.00604553482176812
81 696 269.360632183908 917.584770114943 -0.266498150002447 -0.0237448706149562 -0.00727410262539833 -0.000648119417258282
82 710 274.242253521127 953.074647887324 -0.128798412882493 -0.187404147413832 -0.00351556989527724 -0.00511522125275906
83 100142 435.714884863494 750.998232509836 0.0785765714677224 0.0224006832238938 0.00214475802103283 0.000611429642750412
84 540 268.735185185185 792.311111111111 -0.0423671898050997 -0.174126029405388 -0.00115641810867803 -0.00475279324691854
85 1193 277.347862531433 881.41743503772 -0.0619947115942058 -0.17053924936894 -0.00169215393939539 -0.00465489160640205
86 697 280.215208034433 634.918220946915 -0.149141304161158 -0.031931517258872 -0.00407083183183089 -0.000871575031659994
87 789 288.510773130545 581.987325728771 -0.114594824557283 0.140783770367256 -0.00312788105343898 0.00384271182982893
88 730 295.382191780822 944.078082191781 -0.0709172274662891 -0.0760545766026858 -0.00193569520273881 -0.00207591983409294
89 641 294.650546021841 612.90639625585 -0.0729977314453613 -0.088666169940882 -0.00199248283693507 -0.00242015495996899
90 361 287.894736842105 922.606648199446 0.0652518750125926 0.232098735379016 0.00178105865026419 0.00633516600530483
91 491 291.786150712831 121.044806517312 -0.0182684243361447 -0.0396502964430739 -0.00049863908407702 -0.001082260141212
92 336 292.142857142857 198.907738095238 -0.0927471289469756 -0.164735725930971 -0.00253154528151567 -0.0044964836584433
93 980 302.84387755102 151.594897959184 -0.132226735707483 -0.0862964558459194 -0.00360914642502704 -0.00235547329700266
94 825 303.790303030303 908.321212121212 0.0703592196502683 0.125868453691815 0.00192046430481523 0.00343559626753901
95 739 304.553450608931 181 0.120875481956825 -0.000980751521244035 0.00329931243665425 -2.67697438630592e-05
96 1207 319.652858326429 591.333057166529 0.289286588929896 0.159648459179531 0.00789611611190606 0.00435762603248074
97 423 313.61938534279 232.498817966903 0.271627078488313 -0.157234631801655 0.00741409741397068 -0.00429174029156095
98 896 320.379464285714 525.518973214286 0.15718642464806 0.079269212480822 0.00429042447086005 0.00216366375006622
99 1227 322.125509372453 557.536267318663 0.0668868386938787 0.171549846128421 0.0018256852024799 0.00468247598003201
100 339 310.165191740413 123.286135693215 0.026212383747322 -0.168859740493812 0.000715470518022705 -0.00460904918716635
101 386 315.844559585492 964.733160621762 0.269928364523577 -0.0769802217367293 0.00736773078924713 -0.00210118544175164
102 726 327.365013774105 110.534435261708 -0.104739234269695 -0.0330714018176661 -0.00285887139920635 -0.000902688333053263
103 585 322.157264957265 207.717948717949 0.0945406302676876 -0.0735786066613358 0.00258049913979021 -0.00200833790359692
104 788 326.041878172589 929.356598984772 0.0882506081826963 0.149916851324324 0.00240881214623387 0.00409200049531187
105 499 326.703406813627 134.178356713427 0.0519259276317902 0.0111083331205694 0.00141732513531212 0.000303203437304877
106 632 330.558544303797 948.938291139241 0.0441203438241924 -0.0839233077063417 0.00120427068196191 -0.00229069790132954
107 612 335.143790849673 981.705882352941 -0.0551420071401357 -0.249921792346621 -0.00150510845536493 -0.0068216487275282
108 449 327.051224944321 182.619153674833 -0.0983039035557039 0.168277292618873 -0.00268321818719898 0.00459315119456785
109 238 327.012605042017 238.033613445378 0.344807131690735 -0.324641139666952 0.00941155674763448 -0.00886112329988779
110 523 333.950286806883 152.235181644359 0.0951889564800363 -0.12773457495119 0.00259819529041384 -0.00348653229674599
111 555 347.751351351351 97.9369369369369 -0.216198552102583 0.20020718177117 -0.00590116837750008 0.00546468178684127
112 708 345.168079096045 256.272598870056 -0.128568868286196 -0.00518857108848771 -0.00350930444483956 -0.000141622741382961
113 478 343.755230125523 196.939330543933 -0.00980842447069768 -0.0590118707971907 -0.00026772225695626 -0.00161073690114385
114 639 350.417840375587 171.777777777778 0.0787143057428291 0.0200727452061361 0.00214851749648191 0.00054788826339532
115 586 345.027303754266 228.832764505119 -0.0976289129047264 0.000388002200125513 -0.00266479422715892 1.05905719141668e-05
116 533 353.793621013133 964.669793621013 0.0318817087019362 -0.150311517914727 0.000870215500440843 -0.00410277297264947
117 521 348.007677543186 534.47216890595 0.0793849494909337 0.142426230542187 0.00216682280722703 0.0038875429998407
118 963 367.423676012461 84.6780893042575 0.0636944608995399 0.179110528929291 0.00173854882387896 0.00488884582766925
119 718 353.892757660167 564.426183844011 -0.0595714377915331 0.0765074166014993 -0.00162601035704812 0.00208828016238874
120 706 356.262039660057 126.225212464589 0.00558374857742718 -0.00493960804165116 0.00015240916376438 -0.00013482726174228
121 728 363.885989010989 150.879120879121 -0.117128721075633 -0.0843766197937804 -0.00319704409759687 -0.00230307111534747
122 962 362.529106029106 289.16735966736 0.0435878864719628 0.0103526964183524 0.00118973718736268 0.000282578232516801
123 625 359.216 945.3936 0.0262192078736778 -0.191797244725633 0.000715656783463724 -0.00523513143108153
124 214 354.560747663551 69.5794392523364 -0.0637547425059301 0.0426378346860922 -0.00174019421838283 0.00116380539688007
125 817 365.738066095471 208.556915544676 0.017751404180982 -0.171806154582944 0.000484526949835119 -0.00468947195355731
126 843 362.188612099644 513.427046263345 0.0355714143203859 0.15599145065272 0.000970926508475479 0.0042578074959328
127 324 365.537037037037 263.37962962963 0.172691248499561 0.13685128228367 0.00471363071031614 0.00373537404195726
128 641 363.790951638066 463.474258970359 0.314099106632802 -0.24741468091837 0.00857337709913541 -0.00675321678598474
129 247 363.425101214575 975.684210526316 0.244962480093123 -0.275111666997568 0.0066862836366898 -0.00750920972309317
130 197 360.670050761421 312.370558375635 -0.0608162827225859 -0.118308991830964 -0.00165998856583157 -0.00322925974562279
131 91891 540.406960420498 223.17791731508 0.0586919089099892 -0.0775960614398977 0.00160200349866546 -0.00211799486876493
132 600 372.251666666667 557.653333333333 -0.0661099415495953 -0.0677769898540243 -0.00180447969108388 -0.00184998199737682
133 176 366.375 484.789772727273 -0.013163850136321 -0.186244261121337 -0.000359309048997463 -0.00508356200137091
134 880 382.496590909091 110.554545454545 0.248505981684141 -0.0167080873743825 0.00678300398625354 -0.000456049478145586
135 121 371.669421487603 493.421487603306 0.26850239015736 0.184023447905694 0.00732880862832047 0.00502294460780822
136 1045 390.984688995215 547.542583732057 0.121013403975288 -0.0589352407432026 0.00330307703658335 -0.00160864527357761
137 300 382.97 951.723333333333 -0.142469526243058 0.0663930616300191 -0.00388872476178303 0.00181220749152187
138 765 394.260130718954 417.397385620915 0.0945272756378535 0.100661463020904 0.00258013462338386 0.00274756808792132
139 571 387.210157618214 363.234676007005 -0.0546104328029861 0.239310619307048 -0.00149059906278033 0.00653201534108628
140 955 386.316230366492 506.734031413613 0.214795320079565 -0.0186306909531275 0.00586286697187088 -0.000508527199809398
141 530 386.035849056604 465.97358490566 -0.0472100740170789 -0.232397931397004 -0.00128860528056097 -0.0063433326006074
142 1098 401.375227686703 442.896174863388 0.0536793886940509 -0.0161475693454461 0.00146518608938031 -0.000440750063624953
143 685 399.605839416058 966.578102189781 -0.0179188890900552 -0.0618541134327285 -0.000489098472814896 -0.00168831629378502
144 621 403.033816425121 70.6151368760064 0.305045037046838 0.163650963500934 0.00832624505958768 0.00446687492292228
145 310 392.429032258065 394.338709677419 0.22661768363119 -0.231457942475424 0.00618555996523123 -0.00631767547735065
146 514 405.005836575875 943.589494163424 0.158181185775523 0.00358846993537269 0.00431757660879741 9.79477665335302e-05
147 846 404.073286052009 485.736406619385 0.200288679949826 0.0193521713611127 0.00546690629052101 0.000528220103980967
148 616 404.375 374.498376623377 -0.0241720429104596 0.202728584781297 -0.000659779142161402 0.0055335038190223
149 1363 420.769625825385 539.462949376376 -0.112833113985717 -0.0133562880723392 -0.00307979492791164 -0.000364561668183013
150 975 420.620512820513 405.481025641026 0.0398877567080433 0.0405294023360257 0.00108874165088412 0.00110625545406451
151 1396 438.074498567335 516.437679083095 0.0898905221994836 -0.00425395422431336 0.00245357381851876 -0.00011611224915114
152 933 424.061093247588 924.277599142551 -0.0983171552998804 -0.0705154627008872 -0.00268357989532756 -0.00192472897976587
153 669 428.490284005979 32.3408071748879 0.0335637261063379 0.147891297789348 0.000916126390318358 0.0040367127408321
154 1195 431.033472803347 480.703765690377 -0.0795292660842327 0.0633907105596546 -0.00217076194793099 0.00173025791775145
155 305 425.593442622951 56.6098360655738 0.186294797065471 0.159951779304528 0.00508494138672086 0.00436590519583536
156 780 429.838461538462 958.551282051282 -0.0971964263466477 -0.0855151188307735 -0.00265298944874849 -0.00233414659873799
157 1015 434.913300492611 444.184236453202 -0.159654075067592 -0.0353322674300875 -0.00435777931889602 -0.000964398962139567
158 884 441.066742081448 383.059954751131 -0.0265839812022168 -0.0614210927880705 -0.000725613320223082 -0.00167649693741002
159 1144 445.123251748252 75.2832167832168 -0.0536768768647786 0.0253054292951849 -0.00146511752866458 0.000690715075024896
160 116 436.758620689655 4.51724137931035 -0.0401036262267812 0.173269538051656 -0.00109463383825195 0.00472941520093678
161 576 445.088541666667 39.4861111111111 0.20102785852825 0.218325977332834 0.00548708226862031 0.00595923673351894
162 918 450.891067538126 414.226579520697 -0.0937745882791109 0.0280993704407377 -0.00255958992132014 0.000766976072040774
163 738 452.565040650407 930.642276422764 0.0773295158347573 -0.246027201015021 0.0021107194708452 -0.00671534533656738
164 171 446.239766081871 539.087719298246 -0.0255030628159253 0.0789703331804847 -0.000696109508389897 0.00215550579961425
165 548 458.724452554745 9.28284671532847 0.226667979839224 0.283182645687521 0.00618693280695228 0.00772950816523087
166 1120 458.628571428571 471.366071428571 -0.0446702637069339 -0.0456122184394984 -0.00121928081866557 -0.0012449915989959
167 904 470.70796460177 53.4236725663717 0.039567117389901 0.0578664830859579 0.00107998975783764 0.0015794733904692
168 977 471.682702149437 514.288638689867 -0.117014654198753 0.0268276628066648 -0.00319393062694586 0.000732264642187833
169 810 471.176543209877 377.334567901235 -0.0591854228351747 -0.0259908578900453 -0.0016154740272182 -0.000709423940138411
170 484 474.836776859504 443.03305785124 -0.131486837298943 -0.0618489505044781 -0.0035889507990685 -0.00168817537096833
171 717 475.748953974895 29.1338912133891 0.210355154871164 0.187276889505053 0.00574167206901945 0.00511174773112919
172 634 472.514195583596 418.929022082019 0.0563145423052129 0.0107998156363729 0.00153711295942089 0.0002947824113362
173 685 487.760583941606 464.588321167883 -0.0847585205653751 -0.0812501992302879 -0.00231349514795435 -0.00221773504817856
174 1255 492.252589641434 552.374501992032 0.151584777456386 -0.104643511865163 0.0041375267620274 -0.00285625864338005
175 729 485.323731138546 491.067215363512 -0.0632469437865009 0.086291850049886 -0.00172633378446185 0.0023553475811843
176 844 497.451421800948 10.4526066350711 -0.0902728674911688 0.291713534824955 -0.00246400998436093 0.00796235992450582
177 865 491.300578034682 392.393063583815 -0.125105093876319 0.0378437627343676 -0.00341476025934169 0.0010329505621652
178 295 488.24406779661 970.28813559322 0.00471887652150663 -0.118085998842218 0.000128802365396182 -0.00322317312218892
179 944 494.266949152542 946.343220338983 0.347608550863727 -0.329067351181094 0.00948802185840886 -0.00898193733478932
180 1167 497.506426735218 590.925449871465 0.0274148555541298 -0.0531223772382301 0.000748292146716141 -0.00144998238724157
181 1019 500.600588812561 422.857703631011 -0.0394545603549945 0.0189736021951844 -0.0010769174985251 0.000517887007996067
182 922 507.593275488069 37.9945770065076 -0.26925628309434 0.106894001925822 -0.00734938623680332 0.00291768607039417
183 658 502.715805471125 518.141337386018 0.0442888272720024 0.0547862612178396 0.00120886946018997 0.0014953983228656
184 228 501.052631578947 451.131578947368 -0.171666112586175 0.0916761599654017 -0.00468564948853698 0.00250231304001413
185 651 511.984639016897 494.42242703533 0.0445517470006699 -0.0231873731327921 0.00121604588932673 -0.000632902448965536
186 558 516.281362007168 966.851254480287 0.0816786332734765 -0.144068400379387 0.00222942921265339 -0.00393236624504527
187 561 518.356506238859 472.279857397504 0.0724753089740676 0.166295891279706 0.00197822324575228 0.00453906858017422
188 774 518.851421188631 387.394056847545 -0.0227786133591966 0.0944056285453325 -0.000621745296308975 0.00257681424973372
189 866 530.224018475751 453.227482678984 0.0574147999894071 -0.0183123618778941 0.00156714463997529 -0.000499838365151918
190 673 524.095096582467 601.882615156018 0.145992652111067 -0.0430878051091828 0.00398488895326373 -0.00117608739972296
191 917 522.749182115594 538.193020719738 -0.157301850436044 0.19900470613531 -0.00429357503317128 0.00543186005363336
192 683 524.014641288433 575.582723279649 0.0379192020388096 -0.0354729134677543 0.00103500968806343 -0.000968237914536928
193 935 533.452406417112 430.981818181818 -0.129027317545112 0.201491126164571 -0.00352181787863963 0.00549972722067568
194 1747 536.195191757298 943.523182598741 0.118143627248895 -0.113388027299193 0.00322474609725198 -0.00309494136097464
195 681 532.945668135096 26.2540381791483 0.0848651742795827 0.0301569474022252 0.00231640627533936 0.000823137910227561
196 806 539.476426799007 406.142679900744 0.252938673497111 -0.0275789279203234 0.00690399490177777 -0.000752770523881885
197 418 537.758373205742 6.811004784689 -0.232013397523244 0.171852828420635 -0.00633283669712498 0.00469074592219567
198 719 538.877607788595 511.632823365786 0.0368508562244294 0.0667978186581819 0.00100584904626106 0.00182325538870683
199 1569 544.871255576801 898.883365200765 -0.0588407279751074 -0.0850804552190021 -0.00160606553493954 -0.00232228239735602
200 857 544.530921820303 53.0630105017503 -0.0860779050766552 0.180995166897644 -0.00234950792454332 0.00494028727292281
201 1026 545.492202729045 552.85477582846 0.0368662325657741 -0.0624654076093645 0.00100626874555332 -0.00170500165004403
202 796 544.104271356784 485.912060301508 0.050737746534045 0.0729949896859167 0.00138489357343269 0.00199240800024456
203 407 544.233415233415 380.009828009828 0.0791225307725434 0.208207119381304 0.00215966005323276 0.00568304115320972
204 716 546.582402234637 613.783519553073 0.128451376718568 -0.0871541350651766 0.00350609749679682 -0.00237888376593271
205 796 556.417085427136 581.972361809045 -0.0752958967841093 -0.0161404990014791 -0.00205521156703707 -0.000440557077641328
206 1020 562.423529411765 20.9294117647059 -0.23458410251789 0.196680182411577 -0.00640300443356332 0.00536841186789003
207 1029 564.406219630709 871.667638483965 -0.134475981535579 0.0913909378681599 -0.00367053989054705 0.00249452786474612
208 724 562.595303867403 469.831491712707 0.0941529149652699 0.0562069906655525 0.00256991639878733 0.00153417732304063
209 876 565.810502283105 525.700913242009 -0.267389222976179 -0.136274519535016 -0.00729842458132027 -0.00371963122564061
210 933 569.025723472669 962.769560557342 0.0412398061900161 -0.257020227269647 0.00112564602221426 -0.007015401457554
211 714 566.313725490196 442 -0.0023701433827816 0.0350817484589714 -6.46933804347377e-05 0.000957561013337707
212 890 568.751685393258 387.975280898876 -0.0818647510172503 -0.0319749571493788 -0.00223450932134685 -0.000872760729277706
213 689 572.358490566038 414.648766328012 -0.185943664083561 0.00348084593406845 -0.00507535716504595 9.5010155032528e-05
214 563 569.971580817052 65.0337477797513 -0.214647103164168 0.250394683274868 -0.00585882137135391 0.00683455634862296
215 1309 575.362872421696 605.290297937357 -0.113630706064911 -0.0394192515722932 -0.00310156531032221 -0.00107595374058177
216 1011 582.613254203759 938.904055390702 -0.223802293279685 0.0250789086405773 -0.0061087135092719 0.000684532163479832
217 834 579.541966426858 504.911270983213 -0.155520777924856 -0.149320922479606 -0.00424496042091398 -0.00407573453784136
218 1270 582.394488188976 903.709448818898 -0.076846295957577 -0.0375859204072676 -0.00209752991970869 -0.00102591272138289
219 779 576.525032092426 558.419768934531 -0.139335192185656 -0.10073413897075 -0.0038031726947401 -0.0027495517876865
220 694 585.690201729107 634.844380403458 -0.214405571898948 0.28849235434693 -0.0058522287431858 0.00787443737280381
221 1250 588.2848 32.1608 -0.215663067792115 0.0838601995011832 -0.00588655226167114 0.00228897535443448
222 819 589.288156288156 478.825396825397 -0.12706378653915 -0.125022780471443 -0.00346822303737943 -0.0034125135039533
223 98031 888.721333047709 175.230926951679 -0.364966282006686 0.511193404614628 -0.00996180345005142 0.0139530923068675
224 394 590.903553299492 431.035532994924 -0.152145777249159 0.135308690695282 -0.00415283932635634 0.00369326879836397
225 819 596.631257631258 452.91452991453 -0.140588892090614 0.121517171202616 -0.00383739260121987 0.00331682743038857
226 995 597.818090452261 873.265326633166 -0.0825529343079641 0.0799848614203697 -0.00225329337625189 0.00218319748352733
227 842 596.426365795724 542.659144893112 0.13393151575478 0.0778778680206153 0.00365567862428492 0.00212568681705287
228 852 604.356807511737 60.3133802816901 -0.1046715790703 0.195643365557064 -0.00285702474149582 0.0053401118132615
229 818 603.01466992665 581.920537897311 -0.0441091013777243 0.0726845886890315 -0.00120396381788286 0.00198393556354528
230 595 599.447058823529 397.963025210084 0.130878241237722 -0.0517573465284278 0.0035723390882304 -0.0014127236915627
231 836 604.698564593301 372.366028708134 -0.0223081298338779 0.103119690538029 -0.000608903385598916 0.00281466573657661
232 657 607.371385083714 420.905631659056 0.0482656539069438 -0.109890868306287 0.00131741747474736 -0.00299948593882068
233 1139 609.111501316945 648.23266022827 0.0467264675029901 0.0382050948782872 0.00127540517611837 0.00104281317133042
234 351 599.57264957265 615.598290598291 0.13469386104965 0.00982059380029381 0.00367648694100615 0.000268054420434182
235 481 609.515592515593 935.14553014553 0.0295989935189469 0.313380516977855 0.000807908484405398 0.00855376309845441
236 973 612.246659815005 511.552929085303 -0.0736493973149209 -0.0129026202658421 -0.00201027014394866 -0.000352178744765837
237 256 607.5 486.53125 0.0022395410366031 -0.13765065188852 6.11285719390257e-05 -0.0037571929421682
238 748 618.002673796791 606.088235294118 0.234214653966169 -0.236773220383144 0.0063929202859623 -0.00646275669830063
239 744 616.086021505376 916.938172043011 0.165371291751725 -0.15747179862557 0.00451383151247275 -0.00429821379172025
240 770 620.444155844156 718.227272727273 0.0848152668267346 -0.0514201907799019 0.00231504404474306 -0.00140352098034126
241 870 620.285057471264 562.97816091954 0.0296082430573719 -0.0467975790761191 0.000808160951793034 -0.00127734617601194
242 166 613.855421686747 47.0120481927711 -0.0738897968173993 -0.0557775451049242 -0.00201683188050145 -0.00152245554906207
243 477 613.664570230608 83.0356394129979 -0.276744293943427 0.273631118868112 -0.00755377249380306 0.00746879796400438
244 859 628.81490104773 42.1653084982538 -0.0640058702465113 0.0283200630787329 -0.00174704878362862 0.000772999907093408
245 559 625.93023255814 356.379248658318 0.0254418877875432 -0.0392420036577216 0.000694439727813338 -0.00107111573506196
246 760 625.753947368421 451.189473684211 -0.0284714268647401 -0.014600909785082 -0.000777131401864293 -0.000398533784192848
247 723 625.849239280775 481.881051175657 0.0468148641050022 0.036223505158712 0.00127781797318569 0.000988725415068349
248 834 630.23860911271 533.087529976019 0.0502570169067518 0.168970411939817 0.00137177199399971 0.0046120699790778
249 537 627.525139664804 670.921787709497 0.126123732952716 -0.153008476520175 0.00344256414908682 -0.00417638681827015
250 908 632.859030837004 745.693832599119 0.0835551916751257 -0.17295168107186 0.00228065012505381 -0.00472073925218737
251 1036 629.49806949807 795.315637065637 -0.0143156746985315 -0.069334670274264 -0.000390748254379928 -0.00189249909265231
252 1039 626.982675649663 399.269489894129 0.024246306585797 0.207017386884868 0.000661806179106079 0.00565056724569565
253 866 632.079676674365 693.889145496536 -0.147566288452685 -0.00517120609668581 -0.004027841567546 -0.000141148761610663
254 743 633.675639300135 94.8734858681023 -0.17250642582459 0.221349424666728 -0.00470858595069876 0.00604176213262218
255 1448 646.880524861878 625.33908839779 0.0929087534007152 -0.0344738541263832 0.00253595684258379 -0.000940968456276414
256 271 631.966789667897 72.3579335793358 0.0548622987840762 0.144687909348293 0.00149747377839948 0.00394927582515732
257 303 636.29702970297 933.112211221122 0.0805342367960229 -0.041362420134384 0.00219819275783723 -0.00112899278621479
258 725 650.955862068966 443.591724137931 -0.0514017569363638 -0.166165362185114 -0.00140301782611795 -0.00453550577109036
259 645 644.100775193798 597.612403100775 -0.168797144299972 -0.149402578746337 -0.00460734061568865 -0.00407796335655625
260 749 648.312416555407 655.655540720961 -0.208375932553439 0.0987985870617944 -0.00568764893130731 0.00269672063961886
261 802 648.387780548628 377.955112219451 0.0604217997009334 0.150137746971499 0.00164922109902757 0.00409802987152722
262 736 644.697010869565 566.770380434783 -0.0901465958272116 0.155274008051157 -0.0024605633824153 0.00423822480422722
263 235 645.995744680851 109.587234042553 -0.135337684451317 0.0854220044249862 -0.00369406018681035 0.00233160502858603
264 557 646.091561938959 510.879712746858 0.0575118726871808 -0.0911116440874273 0.0015697942522361 -0.00248690450366964
265 943 649.793213149523 416.064687168611 0.0224437633889588 0.0330136790241343 0.000612605521614109 0.000901112781688381
266 1123 658.297417631345 709.577025823687 0.18740404617061 0.0847565277811268 0.00511521848931177 0.00231344075464193
267 599 648.193656093489 481.868113522538 -0.125067390207527 0.129578247816687 -0.00341373113266239 0.00353685559404154
268 543 653.616942909761 347.65561694291 0.0616630512207298 0.211723266084679 0.00168310122517047 0.00577901484745889
269 813 657.105781057811 68.9741697416974 -0.183847699880212 0.0615742089572471 -0.0050181475419616 0.00168067626371374
270 1135 663.776211453745 745.495154185022 0.0141642580725054 -0.0552402932881787 0.000386615317333666 -0.00150779118891303
271 981 657.411824668705 780.13251783894 0.145054867445698 0.0314273306339693 0.00395929199547489 0.000857813190341914
272 562 662.903914590747 462.871886120996 0.257039363678471 -0.112544688154484 0.00701592378839069 -0.00307192230629613
273 351 655.413105413105 546.353276353276 -0.291811750005457 0.0259330304197451 -0.00796504072098541 0.000707845531607143
274 418 664.162679425837 533.394736842105 0.261009058765549 -0.301856722685879 0.0071242771463959 -0.00823921959294398
275 713 666.290322580645 675.472650771389 0.0696718804816453 0.166925884692382 0.00190170329033549 0.00455626433458035
276 792 669.873737373737 89.0214646464647 -0.0584962257836953 0.272288820881945 -0.00159666230157757 0.00743215976105569
277 743 670.612382234186 585.090174966353 0.0328593031031501 0.123628068464324 0.000896899070290689 0.00337444465329685
278 727 672.411279229711 112.187070151307 -0.214444929623715 0.117186728265253 -0.00585330301754402 0.00319862741159099
279 986 675.804259634888 362.944219066937 0.0407104569897099 -0.102266643672448 0.00111119736503722 -0.00279138170835932
280 851 676.101057579318 394.3866039953 -0.0178702155602981 0.0464947151940106 -0.000487769922314301 0.00126907946586794
281 507 668.18540433925 512.254437869822 0.142264126838203 0.0571075186919644 0.0038831183575731 0.00155875735588929
282 207 669.454106280193 135.666666666667 -0.166508130945775 0.117793131905685 -0.00454486169022827 0.00321517928001063
283 578 672.226643598616 487.996539792388 0.0588290399409861 -0.130215293826836 0.00160574650848593 -0.00355424385003837
284 492 672.341463414634 562.25 -0.163290260239224 0.195460508290645 -0.00445702947918102 0.00533512069973323
285 375 669.336 647.578666666667 -0.0685549802858125 -0.0992216501756434 -0.00187121735020142 -0.00270826820385948
286 567 675.432098765432 427.239858906526 -0.104324335288284 -0.115423030092767 -0.00284754667605186 -0.00315048703423089
287 272 682.919117647059 546.338235294118 0.0139424434012396 -0.207787133117877 0.000380560856232935 -0.00567157757201264
288 493 678.137931034483 618.150101419878 -0.366728576881856 0.0814329218591607 -0.0100099055242237 0.00222272248675699
289 803 688.312577833126 687.433374844334 0.166527121589476 -0.224407339304837 0.00454538004238645 -0.00612522832140102
290 799 688.040050062578 725.77972465582 -0.118471379734407 -0.0757460429178593 -0.0032336921451526 -0.0020674983659259
291 535 690.233644859813 123.635514018692 0.145716724035009 0.0908555310648929 0.00397735745954622 0.00247991386448659
292 989 694.311425682508 330.271991911021 0.0811747993271204 -0.0834708833574825 0.00221567699774339 -0.0022783489182548
293 773 691.518758085382 457.410090556274 0.0191150059914227 0.061877029349565 0.000521746643514921 0.00168894178679809
294 797 697.821831869511 146.706398996236 0.150146564337018 0.2196891568998 0.00409827054269763 0.00599644490200666
295 467 690.010706638116 529.586723768737 -0.227301163891797 -0.121270333582103 -0.00620421565030087 -0.00331008996454347
296 1512 697.137566137566 639.138227513228 -0.192249652269883 0.125729705126398 -0.00524747995547221 0.00343180910690032
297 2003 709.111333000499 587.472291562656 -0.0756149499914165 -0.187583167215629 -0.0020639201669763 -0.00512010762217751
298 568 694.431338028169 480.830985915493 -0.0934459589571257 -0.0203459118104016 -0.0025506199400508 -0.000555344382371158
299 704 696.285511363636 506.816761363636 0.152996080241294 0.102444869743833 0.00417604846018117 0.00279624641280009
300 945 703.539682539683 754.08253968254 -0.0380476507041432 0.000198053295433653 -0.00103851571155261 5.40589117136272e-06
301 670 696.083582089552 406.428358208955 -0.000468577156001117 0.016344921896354 -1.27898761047238e-05 0.000446136827880821
302 434 703.55069124424 704.661290322581 0.130310101734425 0.0394944835801821 0.00355683164454838 0.00107800720829287
303 596 699.988255033557 434.515100671141 0.119502221324576 -0.0258276670362649 0.00326182910414218 -0.000704969623971811
304 524 699.028625954198 560.921755725191 -0.0167650825026143 0.0267009600315355 -0.000457605167788842 0.00072880627300514
305 1055 708.536492890995 368.39336492891 -0.0865042679624033 0.0153150286139994 -0.00236114555649898 0.000418025753079788
306 649 711.454545454545 107.995377503852 -0.144386647144502 0.517244252406485 -0.00394105283303708 0.0141182510061239
307 222 700.927927927928 665.554054054054 0.0572393711491023 0.578655601140891 0.00156235628633073 0.0157944819782867
308 152 703.473684210526 540.986842105263 -0.058933828819699 0.199148040354262 -0.00160860673493685 0.0054357723802982
309 203 705.369458128079 718.743842364532 -0.0766186172357399 0.150632356531581 -0.0020913153985638 0.0041115303055809
310 212 712.316037735849 131.556603773585 -0.187866662447361 -0.364587514158749 -0.00512784566242061 -0.00995146493101453
311 732 718.116120218579 681.241803278689 -0.119180630634229 0.0196485052740881 -0.00325305124326421 0.000536308577744666
312 171 709.567251461988 525.66081871345 -0.0133318199781471 -0.299238877869687 -0.000363893808281547 -0.00816776516877565
313 473 716.213530655391 398.002114164905 -0.0130703545603843 -0.0182652578102895 -0.000356757074755323 -0.000498552653330554
314 354 718.612994350283 730.895480225989 0.14396672853604 0.0315481858677876 0.00392959109849131 0.000861111950102921
315 631 716.133122028526 330.882725832013 -0.0294709642897962 -0.215069718499995 -0.000804413909482893 -0.00587035671343357
316 789 723.209125475285 485.485424588086 0.0931589520658089 0.00637751448159506 0.00254278604858996 0.000174075110216189
317 504 723.14880952381 156.565476190476 -0.2335180774922 0.224243191028695 -0.00637390713799844 0.00612074787226308
318 837 725.026284348865 425.745519713262 -0.0354554034155187 0.0296397939324116 -0.000967759975320701 0.000809022137144443
319 1342 728.525335320417 791.727272727273 0.0422908572743297 -0.0900031510556537 0.00115433460204779 -0.00245664803820229
320 843 724.344009489917 457.628706998814 0.0515512396465827 0.0759996327070307 0.00140709797667377 0.00207442013311704
321 895 724.658100558659 642.541899441341 0.233477295306714 0.0446597432091145 0.00637279398279452 0.00121899366027138
322 701 722.567760342368 542.864479315264 0.186240808021434 0.246179652623756 0.0050834677485475 0.00671950652360501
323 718 728.25069637883 511.444289693593 -0.189985059641629 -0.0629069543846423 -0.00518566759699059 -0.00171705372829394
324 969 736.625386996904 135.084623323013 -0.0495352815710864 0.0980313333392463 -0.00135207213154304 0.00267577834670808
325 635 729.335433070866 174.938582677165 -0.0623202225528816 -0.0398290280975097 -0.00170103880452139 -0.00108713864560973
326 922 727.905639913232 265.736442516269 -0.0171004196308 0.0722661281099558 -0.000466758239525013 0.0019725136261065
327 838 732.471360381862 714.889021479714 0.0255709633066768 0.019738290054885 0.000697962861360778 0.000538759265337468
328 948 733.592827004219 606.626582278481 0.168089720339451 -0.0191995414348053 0.00458803138412948 -0.000524054049741353
329 916 736.043668122271 759.943231441048 0.0502524865913808 -0.133257050147444 0.00137164833843612 -0.00363726899538123
330 630 736.685714285714 292.55873015873 -0.00230061927490384 0.20816216253795 -6.27957106173769e-05 0.00568181405016127
331 383 736.537859007833 108.409921671018 -0.200213196595445 0.200594950334027 -0.00546484596227381 0.00547526598159497
332 618 733.26213592233 343.142394822006 0.00245028945958638 0.0175495724602273 6.6880978313731e-05 0.000479017926039581
333 1103 747.967361740707 316.565729827743 0.062217190942238 0.0304483515718853 0.0016982265429373 0.00083109182598854
334 465 734.062365591398 394.438709677419 0.0270812667459385 0.098047468081679 0.000739186795607904 0.0026762187466594
335 549 739.550091074681 370.952641165756 -0.0749103628224523 -0.132679925455536 -0.00204468836602182 -0.00362151629977508
336 992 751.559475806452 658.956653225806 0.197147993409046 0.0917987927958154 0.0053811808315952 0.00250566031951181
337 783 747.266922094508 555.305236270754 -0.210794420546158 -0.228118843518849 -0.00575366188433219 -0.0062265343250152
338 571 746.063047285464 526.234676007005 0.210190070895982 -0.0194753921997847 0.00573716607985113 -0.000531583433242652
339 843 744.629893238434 683.416370106762 -0.20952787342169 0.0638060504977191 -0.00571909131127869 0.00174159467687672
340 303 743.887788778878 435.287128712871 0.0489666897751296 0.0036662234998464 0.00133655234247241 0.000100070060468655
341 823 753.574726609964 492.843256379101 -0.242783144278731 0.0400443133623579 -0.00662679837433828 0.00109301488568955
342 339 748.401179941003 410.501474926254 -0.145428207653508 0.207750210739939 -0.00396948236634905 0.00567056977077165
343 592 755.060810810811 731.287162162162 0.0518044965170179 0.0868186886942283 0.0014140106568035 0.00236972771240073
344 1036 755.078185328185 448.689189189189 -0.157611010294425 -0.100646629139846 -0.00430201359282918 -0.00274716319515509
345 654 755.256880733945 586.038226299694 0.0651770582130928 0.0488819321123629 0.00177901651572157 0.00133423887073819
346 343 751.01749271137 268.282798833819 0.0561157793274095 -0.082867856465933 0.00153168769737439 -0.00226188921864726
347 698 759.489971346705 636.91547277937 0.169380548865435 0.181215675854344 0.00462326472128288 0.00494630609436993
348 499 753.194388777555 347.573146292585 0.0956531718383019 0.0335330884205938 0.00261086611066636 0.000915290130590832
349 795 759.553459119497 758.389937106918 -0.015561347578802 -0.0699089659077103 -0.000424749062147935 -0.0019081745687296
350 488 757.178278688525 164.571721311475 -0.114822301984152 0.0760635954199882 -0.00313409008021079 0.00207616600391669
351 283 753.872791519435 228.296819787986 0.244595095367433 -0.103260447254184 0.00667625582149618 -0.00281850770995809
352 355 758.92676056338 248.512676056338 0.332185175586669 -0.119089802786276 0.0090670387686789 -0.00325057208501396
353 643 759.472783825816 389.673405909798 -0.0139680063561577 -0.163205802134804 -0.000381258600504258 -0.00445472418393193
354 980 766.105102040816 698.867346938776 -0.0862577466755334 0.0137147155193853 -0.00235441672502297 0.000374344993258811
355 1265 768.293280632411 792.628458498024 0.044482309900038 -0.0501144984158627 0.00121415059438378 -0.00136788193274137
356 568 762.630281690141 282.964788732394 0.154785438963329 0.201670388257219 0.00422488924567111 0.00550462020345531
357 783 764.835249042146 611.379310344828 0.0539137788302892 0.0815533097568186 0.00147158379947834 0.00222600849051503
358 1005 773.607960199005 560.068656716418 0.0383352613941663 -0.143174302917822 0.00104636608377985 -0.00390796173532364
359 370 766.967567567568 471.097297297297 0.0493913237936855 0.164778953669817 0.00134814278476698 0.00449766356535306
360 701 769.971469329529 525.534950071327 -0.270861302837226 0.123923402691388 -0.00739319546521798 0.00338250584049998
361 709 769.169252468265 358.772919605078 -0.0189388270719617 -0.160485419376929 -0.000516937816359536 -0.00438047097293976
362 155 767.645161290323 304.341935483871 0.0992644487223839 0.0347880868139281 0.00270943639591337 0.0009495454794844
363 731 774.186046511628 411.295485636115 0.00961916515514709 -0.0197747043174553 0.00026255639864124 -0.000539753197501581
364 1075 779.786046511628 216.053953488372 0.00400653625634126 -0.052910256867237 0.000109358942644585 -0.00144419253336256
365 1411 794.357902197023 311.21686746988 -0.208607740942962 0.0982399123364984 -0.00569397617228367 0.00268147153831748
366 984 782.737804878049 491.52743902439 -0.131265164388466 0.0670776964035518 -0.00358290020734745 0.00183089468917614
367 296 775.047297297297 259.483108108108 0.165161699810802 0.050943774510369 0.00450811067243046 0.00139051713458488
368 1088 792.113051470588 240.730698529412 -0.194526041919078 0.0988933532701577 -0.00530961431521725 0.00269930729594292
369 962 784.572765072765 728.824324324324 -0.00263629440835692 -0.11939156030618 -7.19580082524997e-05 -0.00325880859685373
370 676 779.247041420118 449.559171597633 -0.259736014964638 -0.217191666966699 -0.00708952924569052 -0.00592827558045936
371 491 782.393075356415 590.900203665988 -0.00715166403349429 -0.0193449954991277 -0.000195205625710835 -0.000528024237868937
372 335 779.776119402985 165.614925373134 0.333708481760125 0.156083049272254 0.00910861761429384 0.00426030769249637
373 793 789.678436317781 379.60025220681 0.128496101763554 0.0297276135228201 0.00350731827287782 0.000811419184602919
374 907 786.120176405733 284.651598676957 -0.112960127125326 0.00320126889761975 -0.00308326176853429 8.73790624534091e-05
375 1030 792.608737864078 637.489320388349 -0.103134494855511 -0.127820014072278 -0.00281506982240108 -0.00348886436897618
376 927 789.215749730313 668.995685005394 -0.0444816910493545 -0.108317842465168 -0.00121413370277165 -0.00295654998823116
377 1127 791.628216503993 759.715173025732 -0.00219110342686466 0.00950097023976878 -5.98064609068734e-05 0.00025933025262764
378 895 793.108379888268 342.74748603352 0.0102026461037333 0.0394234195147502 0.000278482589123019 0.00107606750512824
379 549 790.371584699454 702.078324225865 0.0113195675196641 0.0876344394157123 0.000308969108462501 0.00239199373737975
380 1013 802.882527147088 192.539980256663 0.113192788234705 -0.0954752858176719 0.00308961228461309 -0.00260601068795639
381 450 790.868888888889 420.482222222222 -0.0657284075167332 -0.119806261791773 -0.00179406566865972 -0.00327012792933344
382 432 792.819444444444 612.726851851852 0.0206212551944711 0.330210359391388 0.000562859916842699 0.00901313589666782
383 1033 801.97192642788 799.468538238141 -0.0705586269374358 -0.0971723194689368 -0.00192590715337194 -0.00265233144829916
384 980 797.091836734694 522.635714285714 -0.206168380124286 0.281723354094343 -0.00562739349268433 0.00768967660614103
385 468 799.641025641026 462.901709401709 0.0490334749759987 -0.142807220539242 0.00133837525345688 -0.00389794217273477
386 527 800.157495256167 558.662239089184 -0.0507478862674052 -0.1273874632739 -0.00138517033881007 -0.00347705783711818
387 458 804.508733624454 398.423580786026 -0.0311658489972072 -0.398784804754525 -0.000850676014115935 -0.0108848845487566
388 769 807.026007802341 428.862158647594 -0.12207961880582 0.121370121856992 -0.00333217951289675 0.00331281369884465
389 1211 814.126341866226 266.317919075145 0.0222362493432459 0.0365467020734912 0.000606941397999315 0.000997547118056886
390 1136 808.111795774648 596.120598591549 0.190049847591875 0.10616473858372 0.00518743599275235 0.00289778072999558
391 705 810.53475177305 360.078014184397 0.115866054285273 -0.116369129350916 0.0031625794387815 -0.00317631093994103
392 2419 826.626705250103 489.721372467962 -0.131374797591233 0.0114204287036159 -0.00358589266027095 0.000311722127959927
393 793 817.450189155107 692.040353089533 -0.0682032880618736 0.183538404297506 -0.00186161786394058 0.0050097052776901
394 928 817.70474137931 168.998922413793 -0.136761690959123 0.182220373596353 -0.00373292863477864 0.0049737294535295
395 1069 820.955098222638 538.577174929841 -0.320711007558796 0.231775264049691 -0.00875384981868038 0.00632633681213458
396 809 815.8739184178 719.428924598269 0.00331965725056949 -0.0459782573096977 9.06104883713765e-05 -0.00125498267888404
397 677 816.463810930576 661.171344165436 -0.0792232129798186 0.0368212670946237 -0.00216240818753788 0.00100504140700802
398 749 819.078771695594 220.484646194927 0.140541220021924 -0.212289355271493 0.00383609138573297 -0.00579446632747845
399 858 824.229603729604 321.735431235431 0.0437515533436443 0.0521690931705373 0.00119420449650152 0.00142396237119459
400 1253 819.569034317638 767.869114126097 -0.0654229158133293 0.122467114198336 -0.00178572723178222 0.00334275625142947
401 948 825.317510548523 444.910337552743 -0.155184086777703 0.120952462741634 -0.00423577039104912 0.00330141363746514
402 1604 831.075436408978 585.272443890274 0.0490755754606965 0.241464303125556 0.00133952439181401 0.00659080042878141
403 285 818.60701754386 629.529824561404 -0.00349238440415808 -0.0757441635865935 -9.53250991158968e-05 -0.0020674470693278
404 467 827.576017130621 407.306209850107 0.0870607901364663 -0.315776477720389 0.00237633590362675 -0.0086191611671744
405 466 827.892703862661 375.418454935622 -0.29979576690645 0.153988249731855 -0.00818296552946986 0.00420312985904289
406 613 830.151712887439 823.203915171289 0.0449817807478649 -0.167699877194941 0.00122778371793625 -0.00457739056339227
407 203 829.315270935961 739.857142857143 0.239297547362927 -0.201881734965867 0.00653165854062426 -0.00551038894011721
408 485 837.60412371134 386.736082474227 -0.0762510361953717 0.147545250961822 -0.00208128222493478 0.00402726734642094
409 1003 838.652043868395 644.015952143569 -0.0173123683120372 -0.0249601003233516 -0.00047254340710919 -0.000681289274580818
410 676 838.671597633136 297.735207100592 0.109765112650013 0.0641627195622894 0.00299605342137374 0.00175133000666781
411 859 836.569266589057 348.569266589057 -0.140463366737868 -0.101595495182123 -0.00383396636993851 -0.00277306262060782
412 404 835.965346534653 677.685643564356 0.103312263956106 -0.0184802484787088 0.00281992205376306 -0.000504420852361468
413 587 836.485519591141 226.70528109029 -0.00909790837644259 -0.13826703664676 -0.000248328625193483 -0.00377401724653251
414 482 836.022821576763 772.719917012448 -0.0503321858639225 -0.0197214154648189 -0.00137382374073303 -0.000538298671146095
415 314 838.261146496815 253.082802547771 -0.298052342133175 -0.0662804368145384 -0.00813537851725102 -0.0018091333821295
416 1174 853.948892674617 193.812606473595 -0.131990220037218 0.0013522267356337 -0.00360269069819364 3.69092094925108e-05
417 954 843.665618448637 164.265199161426 0.0296026261872357 0.100841849847502 0.000808007638571896 0.00275249177046445
418 852 843.232394366197 715.31455399061 -0.0110520193750992 -0.00430681336659817 -0.000301666346095176 -0.000117555046505143
419 821 846.537149817296 790.673568818514 0.019164760403738 -0.0895397883584812 0.000523104696849415 -0.00244400049144828
420 832 849.412259615385 537.974759615385 0.1390775924942 0.0891181151649195 0.00379614147673012 0.00243249086526769
421 604 850.17880794702 747.241721854305 0.0364911929165546 0.116326765645748 0.00099603198819875 0.00317515461694597
422 644 850.667701863354 824.89751552795 0.0364254952166927 -0.00212754020960151 0.000994238760699635 -5.80714943955924e-05
423 865 859.77225433526 445.346820809249 0.00536821543470857 -0.167684618842051 0.000146526157824956 -0.00457697408461065
424 611 851.148936170213 591.990180032733 -0.169385054699562 -0.0395667650266159 -0.00462338770862766 -0.00107998014003468
425 354 856.155367231638 479.471751412429 -0.0470026616560743 0.0211319575045015 -0.00128294393244388 0.00057679960465725
426 263 854.623574144487 465.475285171103 -0.0495550655487278 -0.177035966729577 -0.00135261213785715 -0.00483222037513476
427 132 851.151515151515 559.886363636364 0.117554829048402 0.0832755411707245 0.00320867477166869 0.00227301702715711
428 483 857.844720496894 687.076604554865 -0.138531479598885 -0.0496871878851334 -0.00378123525225715 -0.00135621843468928
429 580 868.605172413793 708.481034482759 -0.0611747404985243 0.0587166820277482 -0.00166977271873854 0.00160267968422595
430 744 873.993279569892 758.58064516129 -0.139280642660869 -0.133579673105623 -0.00380168375816977 -0.00364607503214764
431 550 868.107272727273 798.84 -0.0360368458009376 -0.086146993942646 -0.00098363052294835 -0.0023513937143752
432 774 874.872093023256 731.581395348837 -0.0658737367216735 -0.0383375451729906 -0.00179803244873378 -0.00104642841982812
433 678 880.921828908555 781.855457227139 -0.0396766283183912 0.109633299290068 -0.0010829788732684 0.0029924555580954
434 993 885.483383685801 484.956696878147 0.0514898705654162 0.0348042386826549 0.00140542289940052 0.000949986346900212
435 507 884.719921104537 464.463510848126 0.201380428461639 -0.0798117203135307 0.00549670571207792 -0.00217847157387351
436 141 878.340425531915 694.581560283688 0.28021353308558 0.0319740951659855 0.00764846583989884 0.000872737201325769
437 706 898.562322946176 730.447592067989 -0.175216397213571 -0.115535322496001 -0.00478255498198531 -0.00315355207038656
438 183 896.650273224044 756.043715846995 -0.0663628573916048 0.00839914843316355 -0.00181138306279715 0.000229255879142966
439 348 908.109195402299 453.882183908046 -0.120924578377936 -0.0477182016668323 -0.0033006525300309 -0.00130247469267912
440 770 923.309090909091 441.384415584416 0.0387798429893518 0.0539997438889197 0.00105850099784478 0.00147393022724406
441 302 929.354304635762 465.566225165563 0.0412492512900458 -0.0062896097191434 0.00112590382748204 -0.000171675737975411
442 1237 950.636216653193 453.418755052546 -0.119319083301145 0.171591273188582 -0.00325683032731376 0.00468360673717639
443 1580 967.323417721519 492.368987341772 0.0970577298784165 0.197060151185396 0.00264920371010946 0.00537878316635937
444 667 955.656671664168 516.271364317841 -0.0404612029789889 0.0349694225514835 -0.00110439394349842 0.000954495062678948
445 204 958.083333333333 421.098039215686 -0.0112242992675938 -0.0416130543226334 -0.000306368748788352 -0.00113583387988371
446 837 975.204301075269 436.953405017921 0.0827002657213005 -0.092187760623245 0.00225731480687174 -0.00251627724835231
447 1101 992.255222524977 467.298819255222 0.190422223186235 0.208195150625569 0.00519760003437344 0.00568271446442216
448 1214 1005.88220757825 411.528006589786 -0.129391437459056 -0.00219873029120167 -0.00353175658036028 -6.00146371883858e-05
449 245 995.65306122449 442.612244897959 -0.0995331260628859 0.0594855175516717 -0.00271676997983473 0.0016236651526167
450 797 1008.0878293601 489.675031367629 0.221698821836175 0.152401021676201 0.0060512989750639 0.00415980625710933
451 587 1009.95741056218 516.807495741056 0.13929384626277 -0.101831181599529 0.00380204415224849 -0.00277949571287359
452 341 1013.79472140762 437.988269794721 -0.0421205183485722 0.183193789842405 -0.00114968517830114 0.00500029898007574
453 255 1014.18039215686 455.172549019608 0.239028082746581 0.103010544796983 0.00652430346790349 0.00281168658898594
1 156932 156.537016032422 334.348074325185 -0.142146809184844 -7.64949743691406 -0.00341142136433744 -0.183582446432541
2 70 4.14285714285714 646.714285714286 -18.4422413194582 -6.79624761263057 -0.442600550826678 -0.163105063251236
3 1243 19.4923572003218 663.597747385358 -53.4018162822635 -7.47911337146931 -1.28160525026517 -0.179493351191261
4 176 4.86931818181818 689.090909090909 -30.2076458221328 -34.0088847447199 -0.724961811769955 -0.816188816764502
5 287 8.5609756097561 705.731707317073 -27.1104775465395 -28.8711195573456 -0.650631996806838 -0.692886140990993
6 138 3.89855072463768 732.673913043478 -26.7998037006261 3.22278824256322 -0.643176047557131 0.0773446039799531
7 386 7 759.69170984456 -47.4337682101049 -7.60446391130626 -1.13837638136893 -0.182501674150342
8 77 3.85714285714286 783.571428571429 -27.0142511850812 -6.28351738277694 -0.64832263321877 -0.1507999058559
9 805 19.1006211180124 804.880745341615 13.5947618024988 -16.1686924221568 0.326264522728858 -0.388037009614619
10 155 3.93548387096774 825.477419354839 -20.0201299993034 -13.9693826553987 -0.480468746277836 -0.335255154234678
11 636 7.9559748427673 871.792452830189 -8.9394796698517 48.3958237476696 -0.214541093863991 1.16146502355055
12 234 6.94444444444444 901.995726495726 28.13135040729 -40.5160076835745 0.675132212516273 -0.97235509542583
13 10826 66.8359504895622 983.572510622575 -8.55768771319146 -9.4490430828208 -0.205378361016507 -0.226770249927754
14 336 13.8154761904762 847.113095238095 17.3864053478895 28.9493806210623 0.417261245559813 0.694764350331673
15 605 24.1735537190083 716.209917355372 28.7649592581052 -19.5271868148752 0.690338370028351 -0.468638463766351
16 244 16.0040983606557 775.303278688525 1.05178133295581 40.5330370392971 0.0252419968512338 0.972763787736732
17 1172 27.3361774744027 627.852389078498 -1.79431510215679 -10.498050452506 -0.0430622742005501 -0.251945673652095
18 240 18.0458333333333 789.9625 16.1064955851123 4.11384177830087 0.386544330180555 0.0987292490945052
19 331 17.4471299093656 745.7583081571 24.2354088232805 0.819214184858268 0.581632411640561 0.0196605522714171
20 810 25.7802469135802 832.438271604938 34.7438710086395 24.5915329702205 0.833827959405894 0.590179135483287
21 728 35.1799450549451 734.376373626374 28.5426183432198 -4.75246370501226 0.685002347703572 -0.114055716828892
22 731 34.5512995896033 699.915184678523 10.319615597983 49.2893983521353 0.247663365253103 1.18291017250454
23 1532 36.9125326370757 875.869451697128 52.1690956958008 -53.5522770503987 1.25202084123739 -1.2852162006752
24 785 38.7070063694268 907.843312101911 20.6980069476974 41.4889907094959 0.496737306348965 0.995705989482479
25 402 32.4253731343284 758.373134328358 11.4587482976678 19.8816005062678 0.275001732190815 0.477144137903981
26 254 32.488188976378 780.874015748032 2.7062412885177 25.3484970693278 0.064947847944277 0.608345730389918
27 457 44.0393873085339 686.407002188184 1.69307554065685 31.8005607887991 0.0406325974107744 0.763190627316509
28 981 54.0275229357798 821.457696228338 8.17722247735703 -4.39115315348717 0.196247468516307 -0.105384522999769
29 1388 56.9978386167147 659.410662824208 -31.9369870818022 36.6337820886955 -0.7664647603996 0.879184468441683
30 679 52.4315169366716 757.701030927835 -16.0017478854778 -12.8558225295164 -0.384030460594263 -0.308530510708074
31 852 53.3802816901408 948.590375586854 -1.69661484492693 6.73515961643003 -0.0407175381721682 0.161638995201322
32 1215 59.6362139917695 786.053497942387 9.42450120009443 -21.5474803143581 0.226181262362476 -0.51712405725868
33 850 57.9305882352941 849.616470588235 -5.95304004667001 10.7827959686593 -0.142868687059715 0.258779361603131
34 289 54.5397923875433 905.612456747405 15.8007929369186 21.6297890774827 0.37920768610699 0.519099408479053
35 1636 82.6943765281174 638.844743276284 3.14835444530267 12.0896071803686 0.0755582462863856 0.290141892442523
36 1195 67.6887029288703 700.848535564854 -39.2200453725758 -11.858235134675 -0.941252930414387 -0.284589129462361
37 1027 76.2444011684518 746.332035053554 -13.857929361592 1.22437018225726 -0.332580355202619 0.0293840053221223
38 1371 78.4099197665937 910.366885485047 32.5887377014872 7.2940751109795 0.782106307339444 0.175052565790063
39 347 71.9337175792507 611.740634005764 -21.9185814329415 -22.0432476005227 -0.526030217667941 -0.529022116184239
40 939 82.4760383386581 874.712460063898 14.1278617675019 -5.38589270386407 0.339058539143072 -0.129257558022978
41 833 76.7827130852341 947.434573829532 1.83929972158432 3.71865630658803 0.0441418727695344 0.0892450815018027
42 859 82.3795110593714 812.762514551804 7.32199781533662 8.36461978934338 0.175722690647176 0.20074486945971
43 732 86.5737704918033 602.859289617486 -9.50505585440589 5.02302836143568 -0.228114516230719 0.120549074327739
44 276 83.3913043478261 723.644927536232 15.7724766543158 21.0071262591709 0.378528115654556 0.504155947888211
45 1295 95.9374517374517 852.504247104247 13.4715466791894 2.81235760403794 0.323307448233288 0.0674945633292124
46 710 91.3859154929577 560.961971830986 23.156664141633 -46.8559684856146 0.555743313779403 -1.12450960281978
47 628 91.6194267515924 703.170382165605 20.9031063923442 -33.6089794291475 0.501659545766749 -0.806591376307844
48 217 89.4055299539171 791.032258064516 3.60875373911614 -10.5449235685673 0.086607498788415 -0.25307059478442
49 1018 102.741650294695 672.002946954813 -34.6135300221005 -25.6836782716646 -0.830699869308916 -0.616389838598417
50 147 86.4897959183673 778.530612244898 15.407254810615 6.63911424192017 0.369763053621377 0.159333975170076
51 1122 108.570409982175 583.011586452763 12.5425988120332 -31.0932832836285 0.301013366371406 -0.746216474991241
52 201 92.3432835820896 762.756218905473 -11.8655261692488 9.21586863105244 -0.284764109057442 0.221174230495859
53 728 108.421703296703 938.146978021978 -6.60035239506388 9.1871947132771 -0.158403718675083 0.220486077056053
54 263 101.844106463878 885.787072243346 37.6888444810565 5.10888210784549 0.904505208362964 0.122609502601791
55 1336 109.065868263473 742.169161676647 2.89400492736414 12.9985492392193 0.0694540404693132 0.311955849268498
56 680 109.641176470588 782.207352941177 8.95895960872964 -28.2461005885261 0.215008598411193 -0.677886134479596
57 328 103.94512195122 803.884146341463 -29.4057563563604 -5.23117699376747 -0.705717040318099 -0.125544492060759
58 1128 113.753546099291 910.03280141844 -71.9252461330348 -2.59606978226935 -1.72615426755303 -0.0623038108933422
59 323 104.188854489164 955.854489164087 5.84971522893668 -12.6683578956891 0.140388965617474 -0.304031494088821
60 1289 118.794414274631 831.00232738557 21.1671836029239 -36.7107607124844 0.50799720922309 -0.881031900144841
61 706 116.609065155807 10.7832861189802 27.7618585890574 -13.9387437874439 0.666264674160012 -0.334519843401324
62 1421 119.41942294159 626.37227304715 16.2098548633262 7.72441815304843 0.389024878649589 0.18538048982949
63 609 122.233169129721 551.251231527094 21.0426877697906 3.65848494738095 0.505009398611249 0.0878010120816209
64 847 116.486422668241 705.066115702479 20.4348017766903 10.0011575085861 0.490420571216275 0.240020599748588
65 612 126.303921568627 31.4493464052288 -21.3341952776075 -15.711067462322 -0.512005369507354 -0.377054339136208
66 378 126.280423280423 657.021164021164 38.8461315631543 -37.5908288322652 0.932279267444419 -0.902152903163547
67 830 132.469879518072 876.453012048193 37.8014237816648 8.49816365989689 0.90720703074983 0.203949826473484
68 619 135.699515347334 807.588045234249 15.9016405979483 1.24927169762498 0.381627957566848 0.0299816238125899
69 1151 143.314509122502 682.726324934839 27.0136649846257 -23.4206763987772 0.648308564828708 -0.562079418399927
70 1202 135.98918469218 762.108985024958 -16.6092944731094 -40.0044909470772 -0.398611142501669 -0.960079060999804
71 650 137.095384615385 960.978461538461 28.9171197494196 -5.12481247486804 0.693990112574348 -0.122991819972924
72 327 135.489296636086 792.269113149847 6.63545810450853 1.16714051301577 0.159246230497167 0.0280105343490912
73 693 138.773448773449 607.200577200577 -16.8021810776673 1.38565641401806 -0.403240282525681 0.0332547590868923
74 1012 141.115612648221 578.732213438735 -42.4941941683614 29.3848788941434 -1.01983015079672 0.705215996214128
75 196 130.75 846.321428571429 -7.04765400427896 3.85893570109001 -0.1691386361504 0.0926116862544854
76 388 137.30412371134 897.951030927835 16.2663493895273 39.6370937708392 0.390380706717456 0.951261792547539
77 275 134.549090909091 979.247272727273 -6.08601056193913 -0.921426153839586 -0.146059883958311 -0.0221135661425934
78 766 139.997389033943 722.702349869452 -57.3533289040786 -9.2607120961041 -1.37643871615029 -0.222250441461166
79 255 135.03137254902 946.462745098039 -20.9737923033215 39.8493167755344 -0.503355956880362 0.956354992292035
80 744 145.958333333333 919.202956989247 -18.7729904707693 -35.2610974399585 -0.450538292992609 -0.846241022408294
81 734 149.794277929155 851.358310626703 -22.1524158515209 -6.20885587901826 -0.53164207582947 -0.149008083369862
82 1190 151.873949579832 49.5168067226891 53.562643667251 -36.8862694192872 1.28546499203681 -0.885243983099412
83 245 140.918367346939 665.130612244898 -11.8365279128081 -7.24320642403557 -0.284068171722531 -0.173831753825226
84 1325 160.258113207547 21.8339622641509 -1.54051242223896 -12.3957512405771 -0.0369711921033648 -0.297489130087528
85 511 146.632093933464 72.6594911937378 -18.8928525040057 43.6605262060108 -0.45341489573382 1.04782128231747
86 439 150.949886104784 942.246013667426 3.55075462824228 26.1559923797915 0.0852155617686374 0.627725038089579
87 745 156.506040268456 559.13288590604 28.0692126890922 39.3121443824564 0.673640951892085 0.943463240527873
88 774 153.928940568475 639.164082687338 21.8267904761365 -3.79436727189088 0.523827300607099 -0.0910620903114263
89 881 157.774120317821 815.920544835414 10.078157863849 -11.4088449325727 0.241868552991521 -0.273804087257285
90 971 165.358393408857 780.996910401648 -4.54514854048916 -16.187613802531 -0.109080301724881 -0.388491109158756
91 880 163.859090909091 96.3909090909091 27.5624379332671 -5.28971181625946 0.661478721597625 -0.126949285774751
92 281 155.871886120996 725.473309608541 -29.1542366262461 -16.187445173348 -0.699680747377126 -0.388487062179433
93 452 160.396017699115 700.061946902655 -8.41249541203869 9.49126813196525 -0.201893850031489 0.227783620791213
94 807 166.770755885998 744.019826517968 41.4705662014676 -11.1237024654933 0.995263814517907 -0.266960872769017
95 938 165.144989339019 871.904051172708 -26.7325013670581 -29.9945579416811 -0.64156083987206 -0.719847855628253
96 351 161.213675213675 618.136752136752 20.7830844366494 28.8150122141352 0.498779105001356 0.691539605036921
97 305 161.750819672131 900.639344262295 -44.4548133781988 -15.1649218971833 -1.06688360418147 -0.363947237684995
98 115 159.417391304348 1015.45217391304 11.3284796949915 -19.0977215036642 0.271875379254574 -0.458331604637335
99 779 173.029525032092 659.874197689345 -23.1526623111078 -38.3929022257915 -0.555647272719964 -0.921402088749444
100 892 183.615470852018 925.224215246637 -0.329192771360131 8.66297534912192 -0.007900390164531 0.207905188686249
101 747 174.20749665328 603.338688085676 20.0458950326095 29.1953607835309 0.481087088578849 0.700667697626352
102 270 170.022222222222 545.907407407407 32.7859881609164 19.6430321873475 0.786840176747282 0.471418669533035
103 979 179.990806945863 122.071501532176 53.1049825099979 -16.8508606601239 1.27448145284635 -0.404408557554518
104 656 181.565548780488 1013.73780487805 28.3987362524323 12.8340793351598 0.681549280826639 0.308008689654315
105 795 180.578616352201 579.290566037736 16.9796017581856 6.28626055101262 0.4074982514767 0.150865739924064
106 604 179.150662251656 943.559602649007 21.7745835517854 -18.4803969998386 0.522574371905295 -0.443516259761454
107 572 170.333916083916 971.318181818182 -21.2331834677841 38.6433390680035 -0.509581158594298 0.927412393158235
108 159 179.40251572327 3.15094339622642 25.7963872675794 -8.04109303069263 0.619094773579525 -0.192980459532219
109 88 171.079545454545 718.170454545455 32.8389891147987 6.78465530857205 0.788112161587752 0.162826856276673
110 536 176.820895522388 820.656716417911 -30.8836239323981 -33.7439821308351 -0.741184801089292 -0.80983134422145
111 783 180.947637292465 76.6245210727969 5.2839356285344 -4.63823769000649 0.126810661416437 -0.111314374478765
112 871 182.425947187141 686.244546498278 4.95003671128918 25.1338637383156 0.118797327129501 0.603194684544337
113 469 180.731343283582 900.366737739872 -2.56034844339341 29.7895050250995 -0.0614465244069065 0.714926732850629
114 556 184.564748201439 847.007194244604 28.1311244655185 -19.3106387560791 0.675126790075974 -0.46344146582866
115 465 183.69247311828 994.941935483871 55.699677111949 26.9179106190094 1.33675226039939 0.646010528801977
116 860 187.575581395349 634.431395348837 -0.374082637717924 -78.6836841855563 -0.00897771472787093 -1.8883519285075
117 660 196.274242424242 14.0757575757576 14.9611623487001 -1.72233893511034 0.359057154813141 -0.0413348978676342
118 756 193.37962962963 873.269841269841 -13.2779437214254 -19.359297071094 -0.318661116246643 -0.464609230454166
119 696 193.53591954023 962.041666666667 7.18273147681644 -30.9448726989197 0.17238039851072 -0.742654727511485
120 611 188.50736497545 37.7839607201309 -56.9075986463605 -13.8000181073835 -1.36574150998273 -0.331190526679731
121 664 188.137048192771 731.713855421687 23.592579988504 -9.39628627148094 0.566204981133014 -0.225504124333017
122 582 184.76116838488 774.096219931271 -2.37669067432166 14.8577493859207 -0.0570388698086019 0.356575317953079
123 655 196.015267175573 556.858015267176 9.57506158161279 1.06733154529677 0.229794603422188 0.0256151907829454
124 589 193.886247877759 696.774193548387 -10.9135149298316 -22.5222746372873 -0.261916522819937 -0.540518421143071
125 728 199.048076923077 807.223901098901 52.200111304282 2.42726309461294 1.25276519357289 0.0582525715864841
126 954 206.922431865828 840.498951781971 -14.9284054922324 -51.8290383271158 -0.358271013776116 -1.24385970853744
127 837 207.489844683393 759.224611708483 -0.412378233697509 10.6948975029167 -0.00989678153657367 0.256669861533124
128 1020 203.096078431373 86.6519607843137 -9.14648648598081 -8.3544899329571 -0.219509108827929 -0.200501760179298
129 1285 208.861478599222 989.333852140078 -4.83543864005165 -18.778219397154 -0.116047055696934 -0.450663783471669
130 1189 210.861227922624 911.449116904962 54.0906121858648 8.64038565375918 1.29813585742187 0.2073630522161
131 687 208.195050946143 609.553129548763 28.4426777028751 -35.2822739646978 0.682603844088948 -0.846749243798084
132 531 212.789077212806 882.745762711864 9.28731592194567 -18.9577157683838 0.222888914180811 -0.454971567509494
133 862 206.893271461717 139.944315545244 5.96445457433301 -20.7662329268289 0.143142627528422 -0.498374680864418
134 1489 224.634654130289 66.7340496977837 7.60562347287655 -15.0406660456058 0.182529502795508 -0.360965186458194
135 942 214.168789808917 584.46178343949 3.19843392588967 3.71852989259816 0.0767601178652773 0.0892420476568064
136 727 212.343878954608 784.337001375516 11.7748933317583 23.2289012673347 0.282588986028663 0.557476952932686
137 523 208.173996175908 37.3441682600382 16.4512838239058 -39.2702209356211 0.394819000366524 -0.942457107903295
138 532 209.471804511278 634.851503759398 -19.1305817717682 -5.96847845495033 -0.459120227479386 -0.143239197774242
139 301 206.810631229236 734.667774086379 -12.8586369259201 11.3151626179411 -0.308598054201131 0.271555778966528
140 508 208.299212598425 712.698818897638 22.8458205131176 7.65924631018006 0.548283289869148 0.183816412391598
141 673 214.384843982169 655.790490341753 13.6393240005628 -10.4043226175551 0.327333983488399 -0.249696272906358
142 172 214.633720930233 7.30813953488372 25.1497704114874 19.0127781685873 0.603576433280063 0.456293025581631
143 1041 225.506243996158 172.918347742555 -17.1386209515152 25.8632047929004 -0.411314597946771 0.620698346214743
144 545 218.064220183486 689.390825688073 -9.01810489513595 7.98807474306095 -0.216428042820838 0.191708058694208
145 907 225.77177508269 123.87651598677 23.2440830072592 -31.2465832897693 0.557841303790954 -0.749895565074942
146 414 226.545893719807 1016.3309178744 8.6800689072095 -26.5399800105979 0.208315421807815 -0.636940465540158
147 254 214.606299212598 955.866141732283 4.11854695880426 10.8864865145925 0.0988421700484427 0.26126786025959
148 757 226.861294583884 819.036988110964 -2.17383538896542 -7.71212876552305 -0.0521704886025688 -0.185085553352202
149 259 219.907335907336 101.212355212355 -31.6694059123185 12.0895091948363 -0.760043004445274 0.290139540860099
150 1211 232.37985136251 562.088356729975 9.17760157695921 21.074048211286 0.220255848671937 0.505762026691512
151 658 230.147416413374 948.44376899696 12.6640797685298 9.57345181899812 0.303928822108534 0.229755970275185
152 502 233.96015936255 675.848605577689 -5.31184400586857 17.9375143765789 -0.127480442435284 0.430487466572664
153 814 232.34398034398 861.469287469287 -23.0908157493301 -5.70229535931424 -0.554162999640819 -0.136850994588495
154 536 233.046641791045 729.069029850746 -15.62622436443 17.7536475480691 -0.375018165700975 0.426074794697942
155 527 230.161290322581 749.542694497154 -8.70574698430242 -23.1034258908432 -0.208931677222144 -0.554465633983523
156 713 236.854137447405 793.855539971949 2.20240732538627 14.4862876038993 0.0528561945630862 0.347660501880249
157 695 245.66618705036 9.75827338129496 54.4858159850152 -0.576429822950192 1.30762046485992 -0.0138339018957255
158 846 240.393617021277 980.403073286052 15.9925312096039 -3.6294185475679 0.38380926699052 -0.0871034393546968
159 414 232.859903381643 22.1207729468599 22.5112937420137 -26.9026824930852 0.540254887540377 -0.645645064713021
160 538 233.953531598513 704.626394052045 -14.3690050213695 -47.1751581171851 -0.344845804104047 -1.13216992481124
161 1198 245.895659432387 925.057595993322 -12.5428003470327 20.0381751511107 -0.301018203066698 0.480901816965467
162 488 235.577868852459 621.77868852459 11.5820303901755 -28.5742619730755 0.277960413899062 -0.685761772101166
163 642 237.331775700935 893.816199376947 29.7130592549358 -26.7672003619289 0.713092089251906 -0.642393590836378
164 213 233.713615023474 35.4037558685446 11.6216111528163 -36.0435353581778 0.278910323784932 -0.86501897068436
165 396 235.775252525253 599.305555555556 29.779029050564 -40.6886230546612 0.714675316983135 -0.976497740400523
166 664 238.090361445783 647.792168674699 15.7428770310247 -26.7037255191518 0.377817745946992 -0.640870240182294
167 179 231.899441340782 209.357541899441 -0.0204519362018338 -6.02621620452227 -0.000490831785117843 -0.144624862310421
168 810 247.928395061728 99.5888888888889 4.39375184101388 -40.4672403747746 0.105446889634649 -0.971184715027739
169 763 246.657929226737 143.929226736566 6.01574098010034 -20.3578396851377 0.144373464445115 -0.488573536274921
170 451 247.906873614191 770.860310421286 27.4906324771963 -10.7222032480687 0.659755442205561 -0.257325179812267
171 598 243.439799331104 998.254180602007 29.7013691259844 -30.3443140779679 0.712811534550148 -0.728241751787297
172 1219 251.474979491386 833.290401968827 23.5398681008503 -52.1881386162707 0.564939933674492 -1.25247785765657
173 758 253.311345646438 748.982849604222 3.55378978126009 13.4024012793278 0.0852884032619385 0.321648008280422
174 1289 251.210240496509 185.567106283941 31.2912123656634 -3.87586356988744 0.750966630854391 -0.0930179429520463
175 497 248.987927565392 60.7967806841046 24.6155245437945 2.37554647933958 0.59075491602401 0.0570114099505212
176 410 252.4 43.2048780487805 20.9497807185257 16.2860473863356 0.502779696084683 0.390853444498429
177 198 248.313131313131 658.318181818182 5.57315467792275 -4.69799370387505 0.133751710953284 -0.112748475909025
178 1266 268.443917851501 958.13981042654 22.079255300614 12.9773269381697 0.529886275134247 0.311446529280127
179 1024 256.90625 708.3994140625 -23.902068369197 21.8752398917749 -0.57363248006855 0.52499005179755
180 515 254.844660194175 876.380582524272 -16.7127447849008 -1.99868104894033 -0.401093875711202 -0.0479669101962397
181 932 267.491416309013 120.751072961373 7.62895246676183 -18.1183631284934 0.183089381899408 -0.434827706775965
182 951 267.042060988433 577.875920084122 -7.91682524513924 -38.0364446588996 -0.189998121898565 -0.912847363067255
183 544 257.227941176471 601.461397058824 -3.2389611960843 -25.5598487330869 -0.0777327432528826 -0.613418018577537
184 614 260.068403908795 663.669381107492 -28.7027483263548 -17.5192774238246 -0.688845352331468 -0.42045007998507
185 802 263.340399002494 1008.00997506234 -0.678333485983966 -35.0670674668199 -0.0162795166455128 -0.841584442359239
186 498 258.192771084337 627.989959839357 -1.28029771021153 -54.7613537799227 -0.0307262258391489 -1.31423317411185
187 184 259.472826086957 31.7228260869565 15.3657749878528 6.41320532637323 0.368767567656046 0.153912323391112
188 1315 270.453992395437 790.371863117871 -74.7953371434404 -25.5279738710986 -1.79503439118463 -0.612653044774777
189 706 267.926345609065 75.7407932011331 -57.4955795863763 -42.2637033093752 -1.37985263039475 -1.01429853566488
190 928 273.832974137931 902.966594827586 9.5113308993685 8.49154882315115 0.228265112804574 0.203791075140792
191 516 274.686046511628 677.403100775194 8.32531606318198 -25.3908261817215 0.199801608250444 -0.609361598696644
192 363 270.104683195592 861.63085399449 18.972034840513 -22.1487339679538 0.455315214960035 -0.531553713267313
193 446 271.14798206278 935.760089686099 -18.3870028025877 -16.8379136665235 -0.441274866080977 -0.404097839003567
194 299 276.538461538462 5.24414715719064 14.9194652264727 -1.20171411622356 0.35805645381666 -0.0288402760035225
195 995 277.758793969849 150.677386934673 19.2747816353549 14.0746227994163 0.462580920675353 0.337780842132608
196 1284 279.976635514019 189.034267912773 -10.6114124305512 -18.3553535522492 -0.254666279735516 -0.440515306795832
197 906 283.420529801325 609.122516556291 25.1350542917004 -75.3675457474225 0.603223256970801 -1.8087669868558
198 594 280.968013468013 636.671717171717 38.603092350153 -18.8877002318873 0.926446500825464 -0.453291244902118
199 277 272.833935018051 879.599277978339 24.042094375219 17.144519518426 0.576993003679638 0.41145615931768
200 800 277.28125 42.94125 -29.9244830560173 -4.02810231730555 -0.718166108683472 -0.0966715635883476
201 856 283.544392523364 551.267523364486 10.9058720294935 -83.9662993729831 0.261733098699139 -2.01513090028538
202 566 277.547703180212 741.487632508834 -13.5270586886604 28.5967347111399 -0.324639696605043 0.686301101680126
203 1160 293.91724137931 761.230172413793 4.27114350392647 -18.6592782543659 0.102504377572757 -0.44780928144005
204 517 282.377176015474 692.953578336557 0.878438315880624 -26.7575205966391 0.0210818888952401 -0.642161283419132
205 698 283.992836676218 218.799426934097 -12.4167164741406 30.5325139578838 -0.297992280640797 0.732758413784794
206 1059 282.38715769594 840.847969782814 1.02685201154048 90.7655861810492 0.0246437110355874 2.17830890204504
207 493 285.703853955375 811.847870182556 15.5088685838461 7.40796000043624 0.372201711224029 0.177785721371929
208 494 284.352226720648 720.297570850202 31.4626869563976 21.0791694476156 0.755081897919663 0.505884932686567
209 992 292.83064516129 20.8931451612903 25.7287278920696 8.11490889571247 0.617470997144193 0.194751987295661
210 874 285.54118993135 90.4851258581236 18.2961394058928 -27.3319228249894 0.439094209796825 -0.655946524500199
211 1150 295.592173913043 982.707826086957 10.0627427720113 -68.0310579010715 0.241498601854876 -1.63269654586758
212 462 286.201298701299 658.168831168831 19.5831282218008 11.4546894966898 0.469981017368724 0.27490432388141
213 694 288.71757925072 1008.6023054755 10.428250130955 -15.7549749638488 0.250270516048896 -0.378108087648908
214 441 288.365079365079 928.884353741497 -9.24615378777498 18.9668548065158 -0.221901052513589 0.455190897863173
215 1294 305.057959814529 234.6885625966 50.5071083046749 -5.87141729323039 1.21213433709523 -0.140909799579252
216 684 296.687134502924 577.529239766082 -40.3905812252579 12.4848524623224 -0.969344950477743 0.299627495438066
217 1857 306.150780829295 886.281637049004 -50.9587199949823 25.3405372177349 -1.22297269342229 0.608154699666562
218 515 299.170873786408 697.949514563107 -23.6292783211875 -1.03933480807803 -0.567085714769386 -0.0249432891903071
219 1163 306.896818572657 117.539122957868 4.65402929042385 -4.90180428591123 0.111693361551003 -0.117639783549509
220 472 302.101694915254 796.440677966102 60.528148226725 33.1540509260269 1.45263210049213 0.795673418854618
221 479 309.200417536534 821.741127348643 8.95352197026874 -11.1795374788409 0.214878098992152 -0.268300873001907
222 963 306.914849428868 167.821391484943 14.2629722672785 9.22066381930627 0.34230109413342 0.221289311571185
223 667 303.172413793103 54.6131934032984 4.42442264788024 -22.973953190187 0.106182966978948 -0.551358382124336
224 245 298.363265306122 141.65306122449 -3.50390835046142 20.5207407597349 -0.0840912847357743 0.492483045108368
225 675 306.705185185185 729.371851851852 -7.86838254249504 8.25905284888759 -0.188835531815155 0.198211338681891
226 1453 318.726772195458 925.589814177564 -4.37992957085619 -22.7930725328982 -0.105115165074738 -0.54701737621496
227 996 314.79718875502 538.774096385542 48.0377817686192 14.4088546959976 1.1528722731141 0.345802167684543
228 496 307.808467741935 82.6612903225806 -15.8477458105232 7.75463844533035 -0.38033452136309 0.186105755147215
229 445 312.060674157303 629.375280898876 -16.1262630666131 -24.8768405138095 -0.387018735544264 -0.597026311689265
230 489 307.441717791411 644.304703476483 9.44168095648287 10.9291840962403 0.226593564181376 0.262292571563868
231 605 311.570247933884 664.180165289256 14.7944060353689 -23.6914094695393 0.355055123017995 -0.568576817721987
232 236 305.843220338983 206.35593220339 5.38680654764862 22.2483940478453 0.129279489617701 0.533945483632496
233 259 306.235521235521 835.752895752896 -23.4850461166667 -3.52933003707369 -0.563624245414222 -0.0847013869626474
234 1217 315.658175842235 963.343467543139 39.8221698293106 2.32567487392238 0.955703485073157 0.0558145272264581
235 684 319.444444444444 569.095029239766 -35.6873641560565 17.3664340476531 -0.856471117551068 0.416781948692786
236 286 311.248251748252 1001.86013986014 5.58244082410413 5.08489394256774 0.133974571794531 0.122033803857732
237 1042 317.357965451056 604.478886756238 21.6483556196811 4.10299327798951 0.519544992161731 0.0984688928758504
238 634 319.979495268139 774.977917981073 -20.6595465020868 -6.76267148949822 -0.495814283267474 -0.162299260402461
239 1368 325.502192982456 847.652777777778 46.5483045792231 -19.6271959128738 1.11712588995758 -0.471038610315519
240 1043 331.414189837009 1008.91466922339 34.3194370719691 -3.419688368131 0.823641849653514 -0.0820700656266453
241 956 320.427824267782 21.8755230125523 11.8923014393651 -15.2229583318431 0.28540669631659 -0.365340070448837
242 1108 325.724729241877 188.642599277978 -12.0418480417248 -25.5661372793572 -0.288995707404349 -0.613568939173081
243 559 321.853309481216 703.955277280859 -4.1649250050654 9.6523444525654 -0.0999552098610053 0.231649336838836
244 694 330.243515850144 148.524495677233 18.4397231129586 4.23657698618046 0.442540115678666 0.101674805964321
245 657 323.677321156773 679.931506849315 0.9368312280918 4.8193839240245 0.0224832768643787 0.115661754038969
246 922 329.959869848156 256.706073752712 41.5382885377969 44.1245308183328 0.996889101967703 1.05895705987522
247 588 324.460884353742 74.8231292517007 3.78936766942703 21.5644013573548 0.0909421034418218 0.517530150141923
248 615 329.030894308943 728.416260162602 -5.28358237117871 -18.8178993814745 -0.126802183493526 -0.451616074606614
249 1052 330.892585551331 800.512357414449 34.7600591050025 10.8381366825986 0.834216462096156 0.260107499005109
250 861 331.905923344948 114.700348432056 19.9654465984118 -37.9776202414379 0.479156383917077 -0.911435619281909
251 1063 337.86359360301 513.603010348072 -51.0531685754779 -25.0554377103994 -1.22523939154363 -0.601312516181307
252 970 339.096907216495 50.2711340206186 21.7621008759684 4.9948850361655 0.522274796647781 0.11987365472711
253 1049 341.478551000953 294.243088655863 -19.5607393528092 -14.2073406144373 -0.469443700587298 -0.340965974406678
254 685 335.430656934307 750.578102189781 11.1004433923653 -26.5154995953608 0.266402671713092 -0.63635295315049
255 123 331.869918699187 4.49593495934959 -0.865797226558524 -14.390507072134 -0.0207785118273396 -0.345361837884725
256 559 336.821109123435 632.939177101968 -27.2202536907467 0.693913409170024 -0.653266545452639 0.0166534236161754
257 1298 350.322033898305 878.738058551618 -70.0619909553763 -12.533163645429 -1.68143748103684 -0.300786929147002
258 543 339.489871086556 558.543278084715 -12.9757343831955 27.5222528317161 -0.31140830910414 0.660514308011804
259 606 341.60396039604 587.948844884488 -2.43501203933501 -11.7682305690985 -0.0584385406963609 -0.282429084508442
260 880 344.443181818182 234.110227272727 0.792261075315325 38.0654185571964 0.0190136969937123 0.913542715824201
261 383 342.041775456919 654.655352480418 -13.470260948672 -10.204108051476 -0.323276591623975 -0.244891267067038
262 986 347.701825557809 938.951318458418 30.4034538205725 -9.66876688296956 0.729661063149681 -0.232043463377844
263 1194 353.737855946399 210.113902847571 -1.16898850772809 42.6793083298084 -0.0280548848953956 1.02427275776639
264 252 342.769841269841 11.6349206349206 -0.115259160911878 -13.0340000144413 -0.00276613711011328 -0.312806642421494
265 587 346.098807495741 79.7052810902896 21.5396863454726 -19.6406870367902 0.516937007601206 -0.471362387603391
266 819 349.404151404151 696.152625152625 -28.1028582688247 2.59341497340455 -0.674448421649396 0.0622400973866407
267 472 345.622881355932 968.349576271186 98.8794564084709 -9.43115029668132 2.37303596204745 -0.226340835906759
268 1315 357.921673003802 546.314828897338 -38.2567107066673 27.4631714361359 -0.918133590070887 0.659096396936115
269 654 352.628440366972 608.718654434251 -56.8801922509608 80.9254090746653 -1.3650837761699 1.94215171637139
270 258 347.375968992248 671.612403100775 1.71053155418418 -9.01866967632609 0.0410515292026649 -0.21644159716391
271 578 352.59169550173 896.9723183391 -37.3661439699735 -45.8850596577845 -0.896760627783884 -1.10120848802813
272 732 352.81693989071 781.908469945355 34.4360805890136 30.1648261404142 0.826441210316893 0.723934170151643
273 912 357.268640350877 22.3486842105263 1.23663265245146 -16.7215193439268 0.0296782958027876 -0.401304458828021
274 94 345.404255319149 823.042553191489 9.34742698238138 8.54540516743374 0.224331536473772 0.205083588736731
275 1050 355.72 157.054285714286 -12.9577367078831 -8.40230077458998 -0.310976377818302 -0.201649186052089
276 926 358.663066954644 273.386609071274 26.0056234620193 45.8288202164693 0.624116292022312 1.09985878181438
277 1066 363.016885553471 855.155722326454 -1.44010472694127 -78.3670102181674 -0.0345614795051946 -1.88075198065024
278 742 354.877358490566 994.991913746631 15.7052819655635 3.094896496131 0.376915491367776 0.074275293887076
279 629 358.400635930048 102.224165341812 41.1422908957206 -34.5775109072292 0.987385442869386 -0.829835436412385
280 1062 361.516007532957 731.282485875706 6.38394892648532 -0.987405724307964 0.153210190798804 -0.0236970284629677
281 820 364.748780487805 811.045121951219 24.5317040978288 10.2774701785734 0.588743285500781 0.24665190544611
282 1045 366.411483253589 129.005741626794 14.7106109406039 3.93768212792785 0.353044100905384 0.0945015439616007
283 614 361.57654723127 760.889250814332 39.3943312630433 13.962194403544 0.945435666654849 0.335082641351061
284 943 367.58112407211 323.846235418876 2.11764758220521 -42.4242058094406 0.0508220215810701 -1.01815048043165
285 1070 377.940186915888 839.905607476636 28.2695513652114 -25.4816498511162 0.678448936283261 -0.611541301554115
286 873 361.514318442153 641.159221076747 -67.5412338291618 6.67988697200527 -1.62094111981714 0.160312491418822
287 1287 378.11655011655 921.942501942502 21.3716145610972 -13.1079208204348 0.512903405445458 -0.314580688692961
288 667 365.799100449775 189.938530734633 -1.00560152007719 32.1590759752703 -0.0241337144975276 0.771794734391305
289 103 359.572815533981 1017.55339805825 -0.896605993188007 13.3980693945397 -0.0215179001069036 0.32154404615564
290 1406 380.839260312945 92.8456614509246 3.40582605029458 2.64926295841408 0.0817373799511974 0.0635804089301024
291 1098 377.726775956284 504.993624772313 29.6976850089234 -1.41683237777656 0.712723118385745 -0.0340029598339188
292 587 368.126064735945 673.497444633731 31.7019059168342 -0.954277826014866 0.760822981219864 -0.0229019826885267
293 596 372.598993288591 592.494966442953 8.90702205636076 95.7982517393427 0.213762134443562 2.29908926217822
294 715 372.040559440559 966.106293706294 -14.4598884350577 39.4306266239653 -0.347026940781668 0.946306729258265
295 907 377.554575523705 59.2888643880926 4.88637811276381 -1.8047198925122 0.117269566469387 -0.043311981698829
296 248 373.979838709677 704.552419354839 -3.78212483165808 -31.0761884044449 -0.0907682805354538 -0.745806210164319
297 724 375.633977900553 257.07044198895 -17.1683740387784 -13.9736134422757 -0.412028650679481 -0.335356690082179
298 1145 388.689956331878 620.545851528384 20.8905351767311 1.04993641125331 0.5013578456177 0.0251977200549588
299 671 383.43219076006 946.803278688525 35.6401429915634 18.9900603294025 0.855337843506264 0.455747813751756
300 186 377 1018.91935483871 -23.5452594772505 0.644536939277891 -0.56506932283729 0.015468423789225
301 801 381.619225967541 173.590511860175 4.8046054031153 -13.9336075186159 0.115307080147574 -0.334396576637101
302 935 386.975401069519 570.152941176471 16.3996086135694 6.3694291426653 0.393578832419322 0.152861726411786
303 850 387.015294117647 983.258823529412 6.82788106030911 -23.1966945858731 0.163864243283887 -0.556704015700803
304 129 375.984496124031 4.63565891472868 13.9168045869783 4.26824920399149 0.333993318341678 0.102434916452317
305 374 375.810160427807 25.6417112299465 -16.8378692247034 -3.94956866644147 -0.404096772431793 -0.0947868123518372
306 932 394.917381974249 1001.830472103 28.7973103812252 -4.54561416061844 0.691114773756335 -0.109091476273686
307 762 385.106299212598 723.014435695538 -12.5417410501723 4.97503438795223 -0.300992780702585 0.119397253422016
308 903 390.029900332226 308.720930232558 45.0415634299296 14.5540068303172 1.08096518415839 0.349285714694404
309 338 383.144970414201 688.544378698225 -11.9631691729871 -7.48198038399645 -0.287107471043134 -0.179562157433504
310 796 382.463567839196 539.527638190955 1.03127096935515 -19.6243036706874 0.0247497628504928 -0.470969198579568
311 963 382.742471443406 774.197300103842 11.5052604969152 -13.4968777882649 0.27611799157873 -0.323915376664309
312 894 386.659955257271 215.731543624161 -27.6613690070585 -105.848103576603 -0.663852996339805 -2.54027849085429
313 847 393.817001180638 283.965761511216 33.3134998744464 -14.9815020243714 0.799500079138299 -0.359545292426125
314 258 387.174418604651 489.317829457364 13.4468638645674 -5.97629082040626 0.322715078403699 -0.143426688936198
315 191 383.125654450262 895.581151832461 -14.6086764718219 -50.3472218635201 -0.350597746839756 -1.20829717730001
316 1037 405.866923818708 643.563162970106 32.1099912797618 18.6884302514783 0.770616736940079 0.448508908440704
317 566 388.157243816254 664.644876325088 14.1988951151223 -14.3384905011816 0.340763288486671 -0.344113477527822
318 553 393.22965641953 802.564195298373 42.2937603823115 -67.4756228631788 1.01501988383549 -1.61936650373977
319 368 390.315217391304 874.902173913043 -10.3349177324812 -61.1554930831048 -0.248030605494698 -1.46768792663507
320 479 391.319415448852 35.1085594989562 18.5233808376857 -2.86190601609064 0.444547841008995 -0.0686836896445681
321 642 399.722741433022 14.8302180685358 32.2953388589079 1.33830511530039 0.775064945766949 0.0321183619141316
322 758 398.811345646438 128.722955145119 5.76008061371774 -3.93398686314193 0.138237799206525 -0.0944128602598008
323 816 403.455882352941 336.231617647059 7.87601567658519 -11.8001823718779 0.189018721553014 -0.283195904834946
324 241 394.609958506224 903.983402489627 -0.899580825390693 -57.5579107187533 -0.0215892939439497 -1.38134853282038
325 675 402.577777777778 820.835555555556 20.4631346416054 -82.9599859196868 0.491100539632299 -1.99098009990174
326 484 402.179752066116 151.915289256198 17.7922074623894 -22.2673013172866 0.427000204957053 -0.534399244524374
327 400 399.64 262.85 5.18185154258754 -22.1113652693355 0.124360716646272 -0.530656891329805
328 980 404.536734693878 240.069387755102 19.9262431608261 12.4604152987954 0.478215529561623 0.299041021058391
329 1114 408.703770197487 706.854578096948 22.9469712970426 16.8773037318671 0.550710836060862 0.405043172291218
330 862 407.322505800464 764.620649651972 -21.0675363539555 -7.56311109715837 -0.505605746790852 -0.181509236300569
331 312 399.064102564103 58.2884615384615 15.047059663998 -28.5254871393011 0.361118628709228 -0.684591211109088
332 643 402.328149300156 522.903576982893 -20.5703085588978 -22.8851161764411 -0.493672636700448 -0.549226357576094
333 1000 410.612 89.746 9.47818785024579 -14.7534549879008 0.2274697034211 -0.354072327280085
334 796 404.310301507538 595.775125628141 62.2932992574305 -5.48250357142944 1.49499445791656 -0.131576149481552
335 467 404.353319057816 885.976445396146 -0.441988543725508 2.3751526989036 -0.0106074077181492 0.0570019595027772
336 785 406.60127388535 176.061146496815 4.80761129397036 -9.8080194885789 0.115379219369978 -0.2353854259343
337 1028 415.285992217899 741.103112840467 27.8041807148931 8.9551623056061 0.667280374794363 0.21491746586255
338 235 402.004255319149 485.106382978723 6.14059132847422 61.7117894536883 0.147369783168202 1.48103864012906
339 548 415.31204379562 1013.96715328467 18.1014661158964 -9.31130146934442 0.434422190605059 -0.223464550097654
340 709 413.500705218618 669.513399153738 68.4652108061385 -53.4560587095256 1.64311590388363 -1.28290702957542
341 346 406.971098265896 847.208092485549 41.4388831020773 -36.4342088860087 0.994503442879824 -0.874394854863303
342 776 410.996134020619 359.667525773196 14.0805725934741 -16.7721611429301 0.337923632918264 -0.40251982564518
343 856 414.63785046729 957.935747663551 6.13474515939713 6.09617938037635 0.147229479307683 0.146303928299973
344 800 420.15625 900.3625 4.0807147360986 -7.47116479669385 0.0979342238656294 -0.179302591103429
345 601 413.317803660566 443.700499168053 -13.8698774114345 -8.85573447975092 -0.332867099820584 -0.21253126942749
346 790 417.129113924051 564.337974683544 -40.3130811807712 -17.1463409398982 -0.967485005052199 -0.4114998721253
347 641 424.686427457098 10.6240249609984 4.22971661864468 -50.4347368144909 0.10151016206895 -1.21039747329084
348 657 418.961948249619 865.826484018265 39.4325333584863 -16.5127218164461 0.946352489517803 -0.396293468077308
349 952 419.741596638655 215.66281512605 1.34230859642162 4.9602043836551 0.0322144425866913 0.119041343966274
350 815 416.296932515337 45.2883435582822 -2.12822806660428 -19.9547742771803 -0.0510759456102553 -0.478900255869848
351 1031 423.789524733269 787.711930164888 -21.0503518446473 29.7934666213597 -0.505193330905291 0.715021808316594
352 628 416.202229299363 927.374203821656 26.9856676399647 -20.0550069401771 0.647636648657893 -0.481305767818464
353 523 422.512428298279 690.736137667304 75.069398459292 -17.5143343386732 1.80161166599929 -0.420331449490387
354 170 414.435294117647 275.335294117647 -26.5310656973043 17.6607095837692 -0.636726528421255 0.423844350280732
355 847 421.328217237308 536.486422668241 -27.1174739820474 1.42334701153467 -0.650799906235849 0.0341593063668499
356 578 419.676470588235 302.278546712803 -14.9923782757915 -6.38942363679873 -0.359806314651466 -0.153341579915688
357 1325 424.61358490566 488.731320754717 -13.9047040719157 -22.6518280205568 -0.333702914667892 -0.543627609327051
358 1030 428.018446601942 830.474757281553 -39.7050062292463 -61.88214512808 -0.952891642790702 -1.48512705400545
359 1272 427.896226415094 136.096698113208 13.3496817773294 14.5799045051949 0.320382778083094 0.349907240297905
360 919 433.971708378672 985.413492927095 13.734874931451 -6.64835378602905 0.329627137227718 -0.159555717595042
361 972 430.48353909465 187.554526748971 -3.14441348885619 -51.45368691044 -0.0754636661611295 -1.23485154402552
362 727 430.112792297111 77.3810178817056 0.361147968429708 -23.8199995254445 0.00866729195156309 -0.571662886740853
363 383 427.002610966057 375.864229765013 27.9569686934176 8.88322370853317 0.670947176582892 0.213190991182025
364 559 428.46511627907 620.844364937388 -25.2285843777679 11.1593965258899 -0.605467911885312 0.267817504591534
365 659 430.467374810319 318.435508345979 29.5368759151454 18.046797356717 0.708863815589993 0.433110179634881
366 289 428.262975778547 240.318339100346 34.1353770221414 4.98283628867022 0.81922454060589 0.119584493437774
367 1301 440.943889315911 598.535741737125 100.460316202048 23.3285251962131 2.41097546209501 0.559867855699509
368 1103 435.994560290118 276.554850407978 30.6264041897088 -43.0068006687434 0.735011711938915 -1.03213233877357
369 475 432.324210526316 452.197894736842 10.707025671903 -8.64358287903787 0.256960928881223 -0.207439783327301
370 447 434.512304250559 38.3579418344519 1.50017681340828 -3.29084280740344 0.0360031664508888 -0.0789778646754831
371 59 427.745762711864 841.067796610169 11.4759060401889 10.0919557843801 0.275413505692703 0.242199693177874
372 794 446.656171284635 1007.90302267003 5.15507484350544 10.3355959915216 0.123718095092971 0.248046883224703
373 542 445.293357933579 433.992619926199 3.3321316032603 -6.41312362140403 0.0799687661322348 -0.153910362530512
374 471 439.853503184713 568.19957537155 -27.6301075523108 -16.1628951284063 -0.663102743870417 -0.387897878726848
375 941 441.03825717322 920.992561105207 -10.8052582946164 -16.6313176536554 -0.259318441298992 -0.399139683022952
376 284 435.095070422535 357.193661971831 -0.416370185032332 2.52456242704917 -0.00999258550253749 0.0605876857076676
377 204 433.838235294118 725.578431372549 -15.729508784384 -34.872142112995 -0.377496917625517 -0.836906373816563
378 641 446.563182527301 415.867394695788 27.1517807125335 19.437064246642 0.651623243136564 0.466475586833391
379 430 439.1 517.420930232558 30.9801159782665 -6.73514447087626 0.743500540912451 -0.161638631718905
380 178 434.224719101124 877.657303370787 2.0313192092238 -22.7590894795212 0.048750202610063 -0.546201807332476
381 585 440.182905982906 648.095726495726 12.8537609080101 -55.5388843886448 0.308481033272088 -1.33289335048326
382 811 446.420468557337 803.012330456227 55.083140104335 6.01088551185868 1.32195581486719 0.14425693669336
383 394 439.654822335025 676.751269035533 -7.5235911552065 -21.9274156255136 -0.180560786067566 -0.52624223194705
384 407 443.690417690418 768.776412776413 -13.4412719019179 10.9994236685518 -0.322580875314929 0.263978270869956
385 651 442.354838709677 956.127496159754 -8.75242754344004 1.53311190359313 -0.21005197712655 0.036793584969161
386 733 446.379263301501 340.032742155525 -29.1250689755124 52.5485448565392 -0.6989807447008 1.26112734866479
387 1324 450.0083081571 111.669939577039 -5.80408367144582 27.4045867339818 -0.139293840999447 0.657690406146042
388 215 440.813953488372 157.451162790698 5.18853383132361 -32.6555816928975 0.124521086778304 -0.783710515141801
389 65 436.569230769231 1019.6 26.7218789271187 2.19480330024168 0.641305908940031 0.0526737034190221
390 467 449.539614561028 208.845824411135 -2.24227817358668 -24.9699944000662 -0.0538130662941167 -0.599261938078416
391 1183 455.530853761623 698.880811496196 72.9069291930249 -47.0307647881 1.74971395618103 -1.12870458858221
392 351 445.34188034188 254.242165242165 26.0872043587656 -17.8628771306681 0.626074174972187 -0.42869622625756
393 300 447.62 530.726666666667 1.05836974813169 -9.96549139596528 0.0254001140852191 -0.239164638652626
394 1044 449.886973180077 851.485632183908 14.9742236553639 -60.9214436263753 0.359370616795543 -1.46207090771233
395 499 449.428857715431 372.218436873748 10.427474678906 -37.3247238722794 0.250251905756464 -0.895766575177309
396 694 454.257925072046 391.484149855908 30.9666131285103 -6.34135939461682 0.743176482212844 -0.152188072611653
397 683 455.049780380673 471.010248901903 3.07207080549143 14.7264684119563 0.0737274936997195 0.35342466883277
398 1007 463.213505461768 544.407149950348 18.6825116074162 -12.7684957198448 0.448366865232578 -0.306434729973341
399 910 466.773626373626 671.39010989011 35.758119069205 -3.34508186149942 0.858169184667246 -0.080279563032172
400 301 447.700996677741 730.784053156146 -13.0702689507927 -31.5700631579542 -0.313677070854184 -0.757658849664919
401 519 450.246628131021 750.533718689788 -15.3530546331639 -13.4940477755227 -0.368462288276253 -0.32384745839034
402 474 449.53164556962 67.0084388185654 4.62412827802905 -6.75129390847927 0.110975758721338 -0.162026206626685
403 784 454.524234693878 231.179846938776 -0.123307555105355 10.9057224488543 -0.00295929279231036 0.26172950887119
404 908 456.204845814978 887.386563876652 -6.16753734368395 -55.3760703441591 -0.148016468187003 -1.32898593031
405 20592 585.735771173271 38.444493006993 -14.8333674534144 3.39503775424537 -0.355990169078245 0.0814784685916101
406 288 445.333333333333 486.069444444444 1.59299067729671 -3.32557714919174 0.0382306325473243 -0.0798114639404426
407 1082 455.545286506469 172.836414048059 -19.8418973752354 1.53691335309066 -0.476191291264569 0.0368848170278028
408 612 460.799019607843 50.578431372549 3.26785127932453 10.9701804878935 0.0784260845086475 0.263276455529667
409 1149 463.409921671018 308.980852915579 48.6803251649036 22.1319159908059 1.16829285330277 0.531150093890443
410 757 459.075297225892 639.240422721268 1.50265257992562 8.83800893372543 0.0360625830697973 0.212105869049158
411 232 453.047413793103 975.991379310345 -34.4263341143875 36.8715667918604 -0.826207301923472 0.884891130597107
412 539 458.209647495362 941.202226345083 -9.38667181850694 -14.0794619898339 -0.225273384364459 -0.337896979228272
413 422 457.952606635071 269.481042654028 -24.2974054338671 -18.5978069717171 -0.58312028578339 -0.446334014790564
414 374 459.227272727273 448.363636363636 8.69400480018531 -19.2526281087657 0.208649873233783 -0.462049251942617
415 559 459.874776386404 501.703041144902 -0.60154586256019 -15.7925507176888 -0.0144366688139872 -0.37900987876308
416 316 456.705696202532 570.012658227848 -22.1106841377636 39.4055789393903 -0.530640544661106 0.945705602811765
417 31192 573.31065657861 708.092651962042 8.53892346404524 -4.97703240620809 0.204928032509028 -0.119445204425654
418 620 465.535483870968 84.3854838709677 -2.83003495143258 1.84901357285933 -0.0679188069750086 0.0443749982259524
419 680 469.039705882353 797.354411764706 -2.33427332447114 -13.1577672665141 -0.056020883866262 -0.315776967610977
420 1147 477.674803836094 832.185701830863 31.2589304328758 -28.4851784042674 0.75019188764471 -0.683623830408446
421 894 470.89932885906 343.824384787472 34.4181727833997 -73.5577008475535 0.826011435839296 -1.76533200865998
422 1236 478.301779935275 978.927184466019 7.68599547321057 36.7824697060221 0.18445837309943 0.882752864505366
423 879 472.192263936291 134.887372013652 51.0979337652668 9.39825707139113 1.22631372395883 0.225551422115901
424 598 476.983277591973 423.38127090301 40.9433592727726 13.7175135569472 0.982611226744108 0.329210476704445
425 687 472.049490538573 614.34788937409 18.2892329671227 -12.9790911082259 0.438928460224905 -0.311488868094866
426 382 467.725130890052 736.678010471204 -32.3813881701654 7.63256456390246 -0.777130067456938 0.183176069637432
427 592 473.939189189189 902.092905405405 -20.0579664417739 -16.7498321642124 -0.481376793731976 -0.401983946187329
428 49 463.448979591837 1020.14285714286 -8.11843670018008 -0.0293377575986802 -0.194836652070052 -0.000704085118954341
429 756 474.322751322751 587.343915343915 45.1490026301052 44.272033092928 1.08354364782527 1.06249700856438
430 1642 479.504872107186 246.587088915956 -2.53930485942212 19.9582710552337 -0.0609414935001028 0.478984176032572
431 616 474.813311688312 512.823051948052 0.885925210922295 -15.1576203690155 0.0212615690009292 -0.363772006251192
432 441 473.936507936508 1002.7074829932 0.407808403673106 15.3183607848396 0.00978710889695523 0.367629660825355
433 464 476.075431034483 404.241379310345 -0.589578835210738 1.80626983061392 -0.014149468749479 0.0433491791004726
434 366 473.806010928962 459.439890710382 -2.73483860831201 -15.3528366933982 -0.065634163087533 -0.368457057878347
435 221 467.235294117647 854.692307692308 -0.305657932254945 -43.591785150337 -0.00733557092314181 -1.04617154633481
436 762 484.446194225722 291.683727034121 17.7692200765577 -0.932513127300786 0.426448524201177 -0.0223796455456294
437 581 480.602409638554 369.401032702238 47.2414233599946 -55.0311928074564 1.1337602430627 -1.32070911703832
438 476 471.758403361345 932.338235294118 28.0457752408869 -17.0755544308927 0.673078469962369 -0.409801046731237
439 1015 478.244334975369 191.422660098522 -15.2932924487433 -18.6502459127402 -0.367028038757173 -0.447592511725919
440 321 477.093457943925 867.520249221184 -37.7715404280524 -34.3949448076372 -0.906489851718265 -0.825453981097815
441 192 480.645833333333 1018.3125 0.786222667901264 6.01262862866782 0.0188687795511258 0.144298770245287
442 732 487.927595628415 570.926229508197 -5.559121733378 30.0176358543001 -0.13341493035934 0.72040170896203
443 1014 492.442800788955 167.886587771203 -18.0740660297085 6.72343353986492 -0.43376460820879 0.161357577782644
444 769 493.166449934981 391.973992197659 14.7575938184189 -6.74838492655259 0.354171656240992 -0.161956393148985
445 555 484.445045045045 483.661261261261 28.9712071909167 11.7061869051873 0.695288172337516 0.280940081119606
446 1188 492.834175084175 106.425925925926 -0.402550414776348 -14.7205166366973 -0.00966092093847265 -0.353281830499707
447 1680 494.494047619048 634.022619047619 -8.57969464405048 -43.3893662296636 -0.205906511556969 -1.04131363756787
448 956 494.982217573222 443.066945606695 -17.1921484747293 19.22160848083 -0.412599220073146 0.461304803143094
449 785 491.476433121019 791.686624203822 20.1010392271902 -13.9645517687525 0.482410509657317 -0.335139216423564
450 699 495.181688125894 957.233190271817 48.8663852755294 42.7261345735135 1.17275816237358 1.02539655399582
451 783 500.084291187739 529.389527458493 28.9833323363591 -48.4183607006529 0.695579167122733 -1.16200589424145
452 669 497.517189835575 937.029895366218 31.9687954963691 31.6476640245868 0.767228139511953 0.759521214749579
453 725 491.406896551724 874.666206896552 -2.24078315125621 -11.7697916853532 -0.0537771868315555 -0.282466550177731
454 1113 497.896675651393 327.127583108715 19.6651768529171 -33.4025839904132 0.471950125607663 -0.801638033962434
455 759 497.271409749671 912.03162055336 47.369387254416 -8.98218610610185 1.13683128465552 -0.215566017672368
456 726 502.582644628099 469.476584022039 43.3637809523194 36.786962680034 1.04069960928089 0.882860692655865
457 322 493.307453416149 552.329192546584 -11.8892339783532 20.9675478581255 -0.285333079454627 0.503206094678937
458 886 500.479683972912 139.924379232506 46.2380545134215 -18.737149649986 1.10968011112629 -0.449678139026179
459 617 498.320907617504 211.058346839546 -11.4234925993475 -38.4628879911961 -0.274155620743402 -0.923081696871991
460 797 504 505.183186951066 13.8815763914718 20.328616281374 0.33314786694205 0.487872195565903
461 151 493.205298013245 818.801324503311 20.7909239355105 31.133241779412 0.498967247345554 0.747175450201337
462 377 500.543766578249 356.554376657825 19.4011012414075 16.4068350372342 0.465612500527858 0.393752261398974
463 621 503.785829307568 279.528180354267 -14.8550086373174 -25.8416957633647 -0.356509541954356 -0.620182144948564
464 912 509.455043859649 593.740131578947 24.2784454305129 -24.2025100222542 0.582665259315462 -0.580842864036041
465 405 501.740740740741 1012.67407407407 -9.05598112426806 14.4384675417497 -0.217337045126291 0.346512854721676
466 869 508.883774453395 249.620253164557 -2.03965255209467 -19.635587043489 -0.0489501968559352 -0.471239991425767
467 652 510.903374233129 834.173312883436 11.8867565488184 -20.145892810498 0.285273622924495 -0.483486963453506
468 1120 519.908928571429 416.490178571429 39.8438223309558 1.39370304297837 0.956223129566955 0.0334478724047606
469 967 516.336091003102 803.443640124095 16.5951824653201 34.0229950457852 0.398272464446619 0.816527453859401
470 634 513.482649842271 858.791798107256 0.848393462736138 23.76082172501 0.0203608339908545 0.570242662017875
471 662 509.206948640483 985.20996978852 -15.6103077370458 -25.6839974750656 -0.374636178071299 -0.616397499250867
472 862 522.067285382831 372.583526682135 12.6361382678103 3.5406040204122 0.303258246152219 0.0849719544684728
473 719 512.927677329624 555.233657858136 -20.7030436764969 3.7083381441857 -0.496858184223972 0.0889974530122019
474 490 510.783673469388 884.018367346939 9.72277457186239 -30.2226298560124 0.233339609135769 -0.72532141782509
475 1221 526.13923013923 100.579852579853 2.70784396271612 7.3826315585648 0.0649863109743788 0.17717785695189
476 370 517.181081081081 392.467567567568 9.46828743755835 12.9592017224347 0.227232100624728 0.311011537115714
477 1194 523.382747068677 220.252093802345 33.7220121875296 35.2605984868846 0.809304081355714 0.846229047892749
478 357 518.577030812325 293.840336134454 9.20903858534839 -12.1720002239149 0.22101031430268 -0.292119266332508
479 959 522.814389989572 182.945776850886 60.7408874919345 -10.4874533294034 1.45773769011831 -0.251691350305971
480 727 527.255845942228 349.503438789546 -21.1785758582388 -29.7929363889414 -0.508270615171435 -0.715009083119242
481 931 530.839957035446 971.865735767991 30.6240821362441 18.4419607160035 0.73495598432291 0.442593816545228
482 746 527.412868632708 1008.40616621984 -24.5804672110895 -1.71181256142343 -0.589913565208944 -0.0410822724566916
483 940 528.831914893617 318.196808510638 8.79563114630825 5.46389329074888 0.211088832576814 0.131129516106705
484 1275 529.243137254902 482.269803921569 -4.3208695820304 68.3394849449929 -0.103697767745785 1.6400985734826
485 451 522.580931263858 896.933481152993 -10.1395317505652 -24.4341806596285 -0.243341482208552 -0.586402793002159
486 1010 530.118811881188 939.539603960396 -15.7248387881725 -15.0826621467137 -0.377384841069324 -0.361973062733151
487 78 517.884615384615 918.333333333333 18.7077658035696 48.6427685083628 0.44897294780869 1.16739152051007
488 886 530.071106094808 133.750564334086 20.0958519647873 9.11389943321426 0.482286019083907 0.218727042957818
489 686 532.284256559767 271.469387755102 7.54464406972307 -42.4887011589153 0.181066040900757 -1.01969832251379
490 839 532.824791418355 520.318235995232 52.1111184175638 -7.79747205152556 1.25062942818523 -0.187133730942971
491 753 527.394422310757 618.185922974768 8.66016316981034 31.2627905826064 0.207837698401811 0.750284528466802
492 1253 538.060654429369 437.039904229848 10.1599243720724 -62.769955236913 0.243830890483583 -1.50643385920295
493 854 543.934426229508 911.985948477752 -15.7843445518559 -25.4164446798305 -0.378812936674811 -0.609976424258137
494 59 530.220338983051 1021.15254237288 0.140870097102769 21.8317307403628 0.00338078119099922 0.523945863401605
495 1196 545.826086956522 153.183110367893 7.46635107134759 -27.9120284167303 0.179187065151194 -0.669868642207835
496 540 534.82962962963 562.112962962963 17.681217028298 -22.0282585152058 0.424336514225843 -0.528662388898235
497 712 537.258426966292 820.316011235955 17.0323472418309 -36.2117361547057 0.4087641052149 -0.869055669039143
498 647 540.239567233385 584.35085007728 14.6841510523298 -37.6840648377022 0.352409082584017 -0.904390500354067
499 1575 551.180952380952 847.666031746032 35.7465969363817 -27.8234185765958 0.857892661751949 -0.667742069663163
500 837 545.623655913978 251.384707287933 11.2023943047447 86.4517393360115 0.268849420413252 2.07477967494502
501 873 548.320733104238 292.390607101947 15.2588289064905 -21.0632083212941 0.366200938486643 -0.505501877114344
502 660 547.012121212121 545.730303030303 -5.23528761875889 -5.59754174788124 -0.125643144109278 -0.134336983123283
503 530 544.235849056604 393.890566037736 -33.8028287130027 33.7440942961786 -0.811243619943823 0.809834036109163
504 365 539.180821917808 890.934246575343 -13.220941977111 -31.6458512763672 -0.317293115308221 -0.759477710093792
505 1314 560.703196347032 877.073820395738 48.9149830944007 12.7050663382676 1.17392447513508 0.304912470355416
506 319 546.567398119122 335.194357366771 -5.15703687211352 -27.6283205261404 -0.123765182370902 -0.663059856525345
507 541 549.988909426987 608.463955637708 -4.98764751862923 -8.59451526627117 -0.119699959502507 -0.206262195849613
508 40798 834.974876219423 971.548115103682 -7.83403586103298 2.01875375682137 -0.1880112361197 0.0484486407739302
509 318 545.248427672956 184.921383647799 13.7876019868961 -40.2155164748685 0.330892548702343 -0.965143522158349
510 997 553.425275827482 464.142427281846 -14.6675065627213 19.8954578005259 -0.352009626783535 0.477476703017156
511 430 548.744186046512 210.027906976744 -16.853070415302 -14.5878378530156 -0.404461590092272 -0.350097634949754
512 562 556.820284697509 88.1654804270463 -35.4711222538852 -9.74465051628395 -0.851281467152564 -0.233864616095776
513 747 560.135207496653 117.420348058902 5.45587352501464 -16.7140216278929 0.130937047486976 -0.401124519026287
514 354 552.257062146893 351.850282485876 15.3388405690992 -14.5645757934983 0.368121160943867 -0.34953936222263
515 484 557.807851239669 372.834710743802 73.3538059687966 -14.7715626154048 1.76043867795872 -0.354506897339578
516 470 554.804255319149 950.46170212766 -3.22720159589241 -8.09498720251291 -0.0774505212912309 -0.194273880961904
517 517 557.959381044487 231.862669245648 54.2295561448233 7.82031062795604 1.3014704126803 0.187681840380058
518 956 570.46129707113 502.207112970711 62.2921704102548 0.571347075567906 1.49496736639481 0.0137119196077733
519 1138 566.445518453427 529.366432337434 28.8167567419582 32.4902212665466 0.691581472452165 0.779741983631989
520 614 563.320846905537 815.635179153094 -11.6947999956139 14.8983233674938 -0.280666803465221 0.357549064380232
521 926 571.452483801296 169.888768898488 4.82835682319885 -40.3434717571332 0.115877097176947 -0.968214357065588
522 515 564.749514563107 930.900970873786 6.4972732917065 -3.87760073318432 0.155929894201452 -0.093059633623953
523 1058 574.238185255198 317.275047258979 5.87476911505212 11.032764022585 0.14099024089649 0.264778415429624
524 451 566.944567627495 425.545454545455 44.250538959163 -30.5526641722291 1.06198116478601 -0.733242004461981
525 722 563.616343490305 978.608033240997 -0.789403225078817 -3.80006335459884 -0.0189451106398658 -0.0911987922068428
526 150 559.74 390.5 -17.6283732351653 29.3674223601417 -0.423068301130528 0.704797051931226
527 553 565.613019891501 574.386980108499 33.3870884650406 7.84917529642004 0.801266152478701 0.18837457169944
528 1541 588.390006489293 405.331602855289 15.5799871413041 61.2407411920997 0.373908505542554 1.46973382004599
529 639 565.544600938967 194.960876369327 -24.9625664880769 4.85695392153059 -0.599083673523636 0.11656340700526
530 495 569.262626262626 596.006060606061 5.0474819193428 -15.7475648712598 0.121135942160768 -0.37793025074694
531 1546 587.32276843467 265.61254851229 40.4921879757601 -42.1133611179108 0.971783439539946 -1.01069043100981
532 452 574.867256637168 297.444690265487 70.7847560682895 8.33118367132982 1.6987833248284 0.199942426633268
533 645 571.454263565891 344.737984496124 -35.1772899752805 -33.1883882169017 -0.844229703426649 -0.796497489182722
534 681 577.462555066079 911.362701908957 -23.3612074304243 -2.13116460884025 -0.560652205855954 -0.051146420515591
535 634 578.858044164038 244.315457413249 26.7738271199319 12.6363021123863 0.642552628270685 0.30326217830441
536 911 587.834248079034 109.61800219539 0.16572763310163 -2.92754431591728 0.00397734420818964 -0.0702589617145604
537 544 573.290441176471 470.779411764706 18.5231959131764 5.64193241137089 0.444543402953541 0.135402327176196
538 921 585.018458197611 218.787187839305 19.2366184045075 -14.551224571224 0.461665030534789 -0.349218942473725
539 726 581.168044077135 138.071625344353 30.3515916446294 -18.0524009938033 0.728416408162152 -0.433244662901751
540 881 588.565266742338 378.471055618615 28.1987614443801 -14.6741343560095 0.676750029007829 -0.352168689063944
541 1229 590.875508543531 558.947925142392 7.81018878263576 12.0550236518528 0.187438923359478 0.289311912587825
542 892 590.069506726457 944.033632286995 -2.23112343370792 -16.3515095464114 -0.053545360545713 -0.392424489340865
543 1493 591.893503014066 445.778298727394 -6.85209281171355 -62.181190917412 -0.16444530793446 -1.49230393824572
544 803 589.067247820672 967.168119551681 -6.39112528330887 1.08037449462632 -0.153382418210213 0.0259282122025042
545 539 588.426716141002 357.022263450835 16.464503507458 0.432824979526979 0.395136263280539 0.0103874887564813
546 748 591.342245989305 817.601604278075 1.56917715609576 -37.0514612119182 0.0376591251357201 -0.88920846752102
547 703 591.442389758179 846.285917496444 8.09285141655869 29.5947383814294 0.194222623632417 0.71025247323772
548 575 595.773913043478 88.4069565217391 9.35166972644518 -22.0361080548949 0.224433359285172 -0.528850772215098
549 924 593.922077922078 876.593073593074 7.86172646384371 -15.3407334534233 0.188675790706339 -0.368166588808626
550 420 590.338095238095 484.516666666667 3.4015741018994 -8.34579499583175 0.0816353362424533 -0.200293087930929
551 194 588.644329896907 193.365979381443 -13.4169203311356 -16.6441774459772 -0.321996455099673 -0.399448308805824
552 1018 600.26326129666 598.392927308448 -12.9101219233995 26.2329529929619 -0.309833657176331 0.629572037550823
553 1027 607.852969814995 331.968841285297 13.2902291460121 26.5857627632332 0.318955957616246 0.638039218733099
554 917 603.794983642312 151.888767720829 47.2759152481154 -15.0053623176869 1.13458802361371 -0.360117922334899
555 891 605.948372615039 181.23569023569 25.894967768112 3.42407517895909 0.62146063481519 0.0821753459369531
556 415 596.253012048193 531.744578313253 24.7075993777577 29.7183470890576 0.592964645932834 0.713218993474362
557 466 600.957081545064 509.564377682403 30.0051451931778 12.9571491801081 0.720101942062922 0.310962277573523
558 994 601.353118712274 910.067404426559 -22.6408799068265 32.5970219236787 -0.54336486245786 0.782305122724276
559 374 598.644385026738 287.989304812834 60.7122548942523 -71.3978300076156 1.45705052833107 -1.71349665920804
560 535 608.755140186916 212.23738317757 -0.673408501981155 -17.103215235418 -0.0161613205653999 -0.410464886180418
561 854 616.714285714286 570.395784543325 16.2258345858816 20.2402398931309 0.389408380518076 0.485751225699016
562 1361 621.600293901543 298.750183688464 -12.9538158008973 -5.83487606667119 -0.310882278865708 -0.140032836377066
563 481 609.047817047817 490.172557172557 -0.923459201847026 1.58255806754858 -0.0221623578351194 0.0379802574035931
564 258 609.255813953488 107.643410852713 9.90492504900379 8.66209967285501 0.237711089809925 0.207884173084546
565 695 621.260431654676 840.020143884892 18.6814653610762 37.3219352236737 0.448341756071583 0.895699649612916
566 500 618.544 236.93 0.833434531672834 21.3579153644023 0.020001830385289 0.512574634560292
567 590 616.020338983051 794.430508474576 14.7953082932501 -26.2225044079105 0.355076776559357 -0.629321279011282
568 946 622.673361522199 455.127906976744 14.1464003955894 6.3297828379626 0.339503452907129 0.151910243563487
569 844 623.797393364929 818.758293838863 23.2144810002777 -9.77432830979121 0.557130876876532 -0.234576861832403
570 1030 623.730097087379 419.387378640777 82.3540541012766 -39.8065913088939 1.9764381712963 -0.955329611767951
571 1317 622.857251328778 369.320425208808 6.45648723999018 -19.1729017798055 0.154951058243121 -0.460135877288099
572 697 619.117647058824 528.513629842181 -31.1374242222534 -51.7971064456867 -0.747275825826693 -1.24309336630904
573 995 626.922613065327 265.377889447236 27.6814851133771 1.24712093458876 0.664335768448837 0.029930007043888
574 563 622.373001776199 864.934280639432 14.1222302333014 -18.6366709536127 0.338923386365491 -0.44726672245317
575 435 619.981609195402 891.050574712644 -17.6103295011354 2.02855524674736 -0.422635264468537 0.0486838694950504
576 905 624.447513812155 141.909392265193 -2.72676641809047 -42.4370367256677 -0.0654404363177472 -1.01845841320898
577 839 636.054827175209 203.050059594756 4.84730556492433 54.3061190174201 0.116331853373869 1.30330786665335
578 298 624.369127516779 918.046979865772 9.54725428496644 14.1281207746138 0.229127248267275 0.3390647551278
579 155 620.8 97.1870967741935 -10.2751383161285 -7.96801057244159 -0.246595942421623 -0.191226533004669
580 1247 645.085805934242 939.944667201283 55.8099497505534 52.2776903526612 1.33939872455426 1.25462703503514
581 521 628.687140115163 478.965451055662 52.7530875778489 -12.3074030023549 1.26603622712219 -0.295368835800931
582 1069 637.88119738073 598.195509822264 4.19130582862892 11.4162939579155 0.100588330686084 0.27398285851739
583 632 632.5 112.879746835443 -10.0500516534399 -94.1068870562523 -0.241194024120911 -2.25849772412071
584 486 631.230452674897 499.672839506173 -15.9474309150835 -9.17995307683695 -0.382726892302356 -0.220312282980714
585 1707 654.508494434681 526.575278265964 94.8423962121304 32.0513477174823 2.27614941579368 0.769209333549259
586 226 629.469026548673 220.659292035398 -4.32876072182609 -11.9821641320306 -0.103887149435338 -0.287563336422505
587 918 641.602396514161 344.779956427015 38.4459286013897 8.25020965828368 0.922674683692843 0.197999108456477
588 416 635.129807692308 80.1201923076923 19.5985341058597 -35.8144042211763 0.470350747525288 -0.859519987903922
589 700 640.704285714286 897.105714285714 4.26002603918976 10.7655659158079 0.102237566401 0.258365852705232
590 863 642.968713789108 182.031286210892 5.98018447764319 -16.6502308928362 0.143520133914384 -0.399593587184291
591 211 633.549763033175 798.990521327014 20.3706180875976 -5.47132714226449 0.488880208759541 -0.131307923205852
592 753 647.092961487384 313.807436918991 50.1191472388325 -2.40887654610343 1.20282355005657 -0.0578113076231108
593 655 645.619847328244 385.311450381679 8.25774479333218 -9.8440763241152 0.198179946287696 -0.23625076409971
594 556 647.613309352518 92.9622302158273 -5.27065119616858 -52.102756990449 -0.126491844577383 -1.25042875993766
595 451 641.59866962306 242.560975609756 10.7089933862067 32.2630161858731 0.257008152611766 0.774289224820585
596 703 646.581792318634 572.189189189189 66.0123591519134 9.17401967470145 1.58424922523808 0.220169885589423
597 283 638.911660777385 857.424028268551 8.92551845034244 27.4817998415351 0.214206034619402 0.659543465291196
598 464 651.275862068965 551.383620689655 52.6733033349609 -20.3460201326556 1.26412146257499 -0.488289875501348
599 644 650.071428571429 410.72049689441 -12.8191649081895 -20.2772471004301 -0.307650754115029 -0.486639372104402
600 605 650.573553719008 782.310743801653 -25.8618956992378 -55.7941802437356 -0.62066692890672 -1.33902026771255
601 429 646.662004662005 435.962703962704 -34.8866502696416 -10.0875654585785 -0.837254559159768 -0.242094328510727
602 664 654.435240963855 162.885542168675 -13.5004459493711 9.98639314681981 -0.324001009969052 0.239666265666458
603 280 645.685714285714 876.017857142857 4.42317827795381 -42.8936979294319 0.106153102994125 -1.02941795423364
604 1320 660.582575757576 239.631818181818 -46.7803525721536 -12.6298412151671 -1.12269487518612 -0.303107121409832
605 350 650.891428571429 913.357142857143 -2.71405910412128 18.918101927385 -0.0651354699058632 0.45402086376678
606 453 647.203090507726 139.869757174393 33.006859444357 28.6111173027993 0.792140928972527 0.686646273553786
607 342 650.026315789474 502.213450292398 -6.5878829667681 -56.6016197275583 -0.158104461348568 -1.3583982356129
608 426 650.805164319249 849.638497652582 -10.374736923169 15.8240759952567 -0.248986237482516 0.379766462790737
609 642 656.738317757009 282.961059190031 7.19733956185411 24.4304242573759 0.172730982063565 0.586312642045054
610 989 655.663296258847 468.373104145602 9.39722090312099 59.6619654845893 0.225526554821348 1.43184433656772
611 470 653.897872340426 802.689361702128 41.3356842389287 -9.62450202052858 0.992026744257186 -0.230981138459778
612 617 663.726094003242 814.899513776337 21.9628210616303 -57.810933952492 0.527091936994072 -1.38742090876888
613 269 656.10780669145 123.654275092937 26.0493380967428 12.4565167466528 0.6251654118702 0.298947458605981
614 407 662.980343980344 105.233415233415 24.1350865321942 -22.3606956014646 0.579224748682146 -0.536640640291038
615 640 669.5328125 438.0859375 14.6582292408675 -27.6761105268043 0.351786977719814 -0.664206782229843
616 801 667.7265917603 616.630461922597 16.2059272201744 11.3984642183539 0.388930618033848 0.273554957568998
617 1019 673.231599607458 832.710500490677 23.9230713167299 -25.8713058342968 0.574136535730009 -0.62089276539201
618 659 671.383915022762 921.564491654021 22.1428264989934 27.0699554608429 0.531411938253607 0.649659495843464
619 633 668.187993680885 646.178515007899 -3.30837961099151 18.2425638383451 -0.079398735370827 0.437808434640935
620 808 671.856435643564 893.507425742574 30.2634075460616 16.1863560456284 0.726300053109412 0.388460923896115
621 808 681.22896039604 767.465346534653 10.8349972304024 12.8158220560733 0.26003215440641 0.307570528064285
622 695 671.447482014388 866.007194244604 8.91132990056769 -7.47091882342434 0.213865519611657 -0.179296687921561
623 728 666.741758241758 348.583791208791 15.8124062633473 -21.1983217264595 0.379486397603344 -0.508744501831934
624 1400 680.462857142857 486.921428571429 42.4541817394192 27.1115761082501 1.01886988122954 0.650658361499167
625 551 677.56442831216 265.010889292196 26.9964232948362 -0.897617313021461 0.647894776652651 -0.0215421710568167
626 936 672.345085470085 381.462606837607 2.10442202592056 -25.4203333826581 0.050504617725694 -0.610069750334055
627 565 670.734513274336 140.78407079646 7.1801549873916 -21.7586124413502 0.172318564614347 -0.522191076721509
628 1610 686.368944099379 222.878881987578 30.29998791237 21.1312790361811 0.727177955637479 0.507135525399401
629 758 672.261213720317 572.581794195251 48.0585987107763 -28.4442078525537 1.15337186478009 -0.682640566582642
630 1094 682.704753199269 743.114259597806 -18.9147632585732 2.73213203448251 -0.453940738112337 0.065569207258844
631 1147 676.119442022668 309.301656495205 11.1061697413372 -21.9722898377764 0.266540099977113 -0.527319180823349
632 227 668.63436123348 83.4933920704846 21.3508799288762 23.7878938695631 0.512405789158846 0.570892374050362
633 729 675.540466392318 186.643347050754 4.07568853233452 27.3457390070106 0.0978135985839181 0.656278102949204
634 670 677.386567164179 409.577611940298 9.8444046916345 38.5649142178083 0.236258644684418 0.925530253059664
635 734 677.908719346049 951.655313351499 38.9361292995553 -26.4286185536252 0.93443914850303 -0.63426787052618
636 791 685.447534766119 595.640960809102 24.8427818245719 -5.40389656278382 0.59620892760043 -0.129689637710953
637 596 681.214765100671 786.828859060403 -20.7980333221792 3.30674645516007 -0.499137867521328 0.0793595408034173
638 673 680.915304606241 113.904903417533 8.27817484122045 -10.8613007754167 0.198670252769003 -0.260663420601791
639 277 681.28880866426 453.501805054152 9.18326667104712 -19.3860489206828 0.220391806862721 -0.465251255637469
640 1185 689.542616033755 536.06582278481 11.5629047716906 -7.27791094441753 0.277501412786904 -0.174664637397844
641 1001 687.737262737263 677.57042957043 -42.3079860997799 -49.4639185961888 -1.0153612908412 -1.18709853306281
642 305 684.547540983607 280.27868852459 5.36994051278389 5.55580614782675 0.12887471689013 0.133335358686576
643 901 688.45948945616 161.697003329634 0.655848536814896 4.19145456225409 0.0157398940088087 0.100591900186303
644 439 689.189066059226 88.2164009111617 71.0250332261294 23.6798670660246 1.70454980410654 0.568299808324647
645 1052 698.053231939164 706.277566539924 -3.64676690691099 1.45842658540042 -0.087519787523457 0.0350011909538042
646 722 694.767313019391 348.362880886427 20.6573963808356 33.9395611988956 0.495762681901154 0.814525101436436
647 612 697.694444444444 626.183006535948 14.5668071291042 -21.1954279866319 0.349592912675155 -0.508675054153671
648 807 696.947955390335 649.620817843866 -38.6285802234799 -25.4264930794111 -0.927058191485969 -0.610217578633694
649 1095 696.332420091324 852.43196347032 -7.31752127171212 -30.4295649167952 -0.175615256814179 -0.730287710712235
650 775 698.327741935484 374.289032258065 30.4910594941392 -1.71894556828265 0.731763536417681 -0.0412534595000803
651 807 701.303593556382 801.582403965304 -6.54106289917851 -56.4968156680317 -0.156980813341478 -1.35588301342967
652 798 700.322055137845 888.309523809524 -21.4928209428047 6.58302748033187 -0.515812271584784 0.157987933160157
653 745 701.790604026846 931.487248322148 26.7393785844838 -29.3782434905426 0.641725888152692 -0.705056751291681
654 1229 702.883645240033 425.572823433686 39.1035391271703 29.8360007439948 0.938456864171788 0.716042596721926
655 727 700.323246217332 318.195323246217 25.9525025549714 -2.06440088523633 0.622841428391988 -0.0495441390829563
656 1046 705.185468451243 560.154875717017 41.0851978018849 -42.2334304708298 0.98601524960804 -1.01357200927455
657 293 699.122866894198 914.19795221843 35.9897841992837 -28.1849947616888 0.863728981462226 -0.676419638507202
658 692 701.365606936416 114.920520231214 -32.284989609053 -35.740583297298 -0.774816571200805 -0.857748338731508
659 492 702.119918699187 198.869918699187 11.0689441385023 38.9070118036492 0.265646712235668 0.933740349506558
660 784 710.696428571429 257.983418367347 20.8580919677884 -14.1647088314911 0.500579231896085 -0.339942842223998
661 848 711.990566037736 294.385613207547 16.9281679827061 27.270456502693 0.406263877792721 0.654471376895608
662 999 707.495495495495 459.416416416416 -31.5001278530408 0.834167949790536 -0.755980452557934 0.020019431893547
663 1042 717.255278310941 391.600767754319 24.2614250759619 -70.758664441951 0.582256783026216 -1.69815714452909
664 342 704.809941520468 140.023391812865 9.21643604601038 34.5427496856189 0.221187848047467 0.829001192050995
665 1259 713.277204130262 503.166004765687 55.5006328625473 -13.1421222761046 1.33197534132008 -0.315401499073668
666 956 711.153765690377 597.530334728033 4.49369419421325 -19.4553422179621 0.107845434356558 -0.466914245022172
667 542 711.476014760148 735.142066420664 2.06157221251669 8.68527727021467 0.0494762529685662 0.208440418780528
668 1124 721.665480427046 153.300711743772 21.557895993082 -8.73316402223797 0.517374026069984 -0.209589666448189
669 702 716.465811965812 334.437321937322 4.27449226943689 -23.7672480919987 0.102584745540718 -0.570396890211713
670 187 707.363636363636 769.786096256684 -26.951721893701 23.7844350717188 -0.646821975119342 0.570809365385386
671 897 717.833890746934 76.3522853957637 -17.1502014087115 -38.5018852191885 -0.411592520605147 -0.924017602345255
672 681 721.518355359765 756.308370044053 -0.55730055863166 -59.6480592666465 -0.0133748132861779 -1.43151059732124
673 784 727.184948979592 274.380102040816 57.0763699089316 -29.9682996417634 1.36979189911297 -0.719217675282707
674 947 727.34530095037 843.938753959873 58.2529088282227 -0.197684734279365 1.39802798846496 -0.00474429169245048
675 872 722.912844036697 673.732798165138 -35.9888710604567 51.6588392696524 -0.863707066785978 1.23977505335488
676 240 712.933333333333 179.533333333333 23.984732594328 -2.38032084464948 0.575616362121869 -0.0571259912901429
677 728 723.343406593407 822.214285714286 12.0948245755119 -12.2264694979634 0.290267106180068 -0.293426489802767
678 1328 725.403614457831 227.32078313253 27.3376203778836 -21.7561653692456 0.656083261679029 -0.522132348747906
679 681 723.422907488987 898.459618208517 35.7204925502804 -30.7503917246954 0.857266175227492 -0.737987323760176
680 459 723.97385620915 779.437908496732 -31.3607630190766 -35.8950640269777 -0.752635796601537 -0.861455765332427
681 549 723.76320582878 123.846994535519 20.0639474987925 17.9061301976799 0.481520334806247 0.429734268811756
682 1211 732.091659785301 610.146985962015 -13.1171291014756 -25.0366252043523 -0.314801680826736 -0.600861029542854
683 1003 730.421734795613 188.144566301097 -15.2884118766154 -42.0694797608976 -0.366910908530172 -1.00963730994667
684 395 722.26582278481 648.058227848101 -74.6438846612684 -19.3937944513987 -1.79139964034973 -0.465437142813648
685 780 732.029487179487 718.897435897436 4.73754535332125 -24.6166655234909 0.113697687099127 -0.590782298717542
686 807 727.978934324659 871.893432465923 -7.88094481974636 9.7215178610414 -0.189137017449941 0.233309448978337
687 581 729.146299483649 95.6746987951807 34.6383467169511 -18.3236130528981 0.831295452167871 -0.439753557599898
688 1402 738.147646219686 461.98787446505 23.0724579332984 28.9042451977707 0.553722425236285 0.693681132578222
689 774 736.341085271318 45.4573643410853 -19.7368211306965 -21.9284228331673 -0.473669536836454 -0.526266404207604
690 191 723.706806282722 356.79057591623 -37.6254098843967 -39.836389426039 -0.902982823586799 -0.956044745185498
691 224 722.821428571429 548.410714285714 -5.45083633987871 -78.7858882573741 -0.130816158660224 -1.89080475285242
692 703 735.591749644381 803.315789473684 29.9114059929218 -6.00581167972007 0.717852268558024 -0.144135168364855
693 1278 737.548513302034 924.169796557121 12.6564326416755 -26.6439716452331 0.303745296554382 -0.639436190109295
694 993 741.13192346425 537.865055387714 28.340473614223 5.4664877374417 0.680151019340014 0.131191780964617
695 835 734.22874251497 416.894610778443 6.11136641179722 -64.7196903344455 0.146668406150352 -1.55322610170677
696 327 727.134556574924 697.914373088685 35.8240766966433 -7.36454525446221 0.859752120370654 -0.176743798638718
697 483 737.567287784679 576.834368530021 32.3297077910635 19.8499641368488 0.775889775463072 0.476384887751658
698 718 741.034818941504 363.032033426184 -27.4430938388888 -72.7752742753387 -0.658614549017149 -1.74655433267987
699 433 730.995381062356 12.4757505773672 -7.76929893902616 7.83899200899503 -0.186457596470228 0.18813018011246
700 449 739.43429844098 560.536748329621 9.95156182334982 -30.1269402910822 0.238830338910768 -0.723024936968299
701 1022 746.084148727984 299.881604696673 -35.3690169759621 -54.2514332597832 -0.848831013790185 -1.30199544773239
702 887 741.573844419391 333.617812852311 14.7152283759404 25.4665449850625 0.353154916038312 0.611178795613556
703 764 748.353403141361 488.412303664921 21.1412440583779 -59.788770309019 0.507374678777611 -1.43488756131291
704 1295 755.427027027027 514.266409266409 74.7361750470056 72.4021762319051 1.79361454334638 1.73760024750792
705 601 747.153078202995 633.89850249584 -5.11525820862671 -48.5024991011662 -0.122762524442738 -1.16402515544554
706 194 738.912371134021 653.80412371134 1.24653174519121 1.52327228594413 0.0299158669213627 0.0365574412100629
707 1139 757.460052677788 734.028094820018 56.673221268041 -47.1790407330737 1.36011662117726 -1.13226310480499
708 583 746.679245283019 782.897084048027 -34.0101228518291 1.10649477404485 -0.816218530446208 0.0265550801551641
709 664 747.626506024096 114.84186746988 12.2181531492153 -3.22892820033338 0.293226903403641 -0.0774919585581765
710 922 751.546637744035 696.031453362256 14.0042009325496 -41.1750773749936 0.336090767888076 -0.988172294832472
711 938 753.256929637527 65.1481876332623 3.94216621302434 5.63107459477859 0.094609158784511 0.135141747373488
712 689 753.487663280116 758.645863570392 21.8327784758754 25.2168883188714 0.523971008301672 0.60518721486913
713 742 751.808625336927 143.730458221024 4.36279376878715 -45.8847313209925 0.104703918127947 -1.10120060818085
714 932 758.502145922747 268.464592274678 94.649161644572 -18.1831270189572 2.27151192490748 -0.436381993649042
715 1168 760.9375 386.554794520548 24.4948428491006 -19.1377703611987 0.587858641996304 -0.45929274846458
716 604 750.177152317881 18.4917218543046 -29.0127022186729 -45.6689105917946 -0.696284023211786 -1.09602106563132
717 708 754.334745762712 424.067796610169 -18.513223464544 -38.9627035532466 -0.444304071346208 -0.9350769115123
718 730 763.954794520548 244.641095890411 57.9154330776827 21.550101872436 1.38992881274699 0.517186972770369
719 729 755.899862825789 870.576131687243 4.69730682761932 17.2477252351347 0.112731991372039 0.41393302242084
720 760 756.353947368421 224.093421052632 -27.7241579862689 22.3557039877736 -0.665359886760713 0.536520845146246
721 884 761.621040723982 201.260180995475 -13.0470727741987 -2.33422347606637 -0.313120379269918 -0.0560196875403369
722 845 757.822485207101 664.679289940828 -0.423204439559923 -11.9112023846359 -0.0101566027044602 -0.285860305432917
723 686 758.975218658892 896.411078717201 14.5059124015501 -3.24924660952248 0.348131482933997 -0.0779795857908561
724 209 749.923444976077 949.866028708134 -11.9365323014969 14.387810024399 -0.286468205251646 0.345297110675466
725 979 763.082737487232 96.9244126659857 16.470077890675 22.8451240484904 0.395270044475547 0.548266575218129
726 34549 855.789255839532 799.308171003502 4.184136675196 -35.3827458435751 0.100416276150878 -0.849160496756082
727 1508 770.34350132626 167.872015915119 6.12134106306092 -20.1811853066197 0.146907790619254 -0.484333958021731
728 568 760.272887323944 611.110915492958 -24.554367733937 -47.8181433156168 -0.589287196495734 -1.14760110793425
729 326 760.966257668712 363.822085889571 49.7551403961558 -68.691356495391 1.19408764717564 -1.64854323806153
730 502 764.804780876494 440.729083665339 10.9096097585581 -1.4888443880916 0.261822801513138 -0.0357311963795466
731 969 765.620227038184 580.113519091847 -0.129302155530843 11.4083662751139 -0.00310315889862291 0.273792599821931
732 1046 770.448374760994 931.089866156788 -20.2639046623569 9.4500373281515 -0.486319163170017 0.22679411110186
733 424 770.764150943396 8.38207547169811 42.6260272564128 -5.2548587526899 1.02299405025872 -0.126112837272279
734 614 769.319218241042 33.64332247557 15.34529837272 -4.38839697552655 0.368276143594304 -0.105318376707547
735 281 768.224199288256 641.725978647687 -26.0199252249231 42.0406041150982 -0.624459524063872 1.00894431517912
736 1126 772.936944937833 316.085257548845 -20.0741842355644 -11.34842799514 -0.481766009139176 -0.272354124136003
737 378 771.854497354497 342.436507936508 24.3610986996605 -8.59582180234026 0.584648878433044 -0.206293551777227
738 336 767.818452380952 549.360119047619 -10.9954144172694 -10.0910907714686 -0.263882051717671 -0.242178933489047
739 963 778.478712357217 484.76220145379 38.233282904299 41.1288693726296 0.917571339634335 0.987063335951355
740 917 782.833151581243 413.802617230098 -30.4081572242845 -48.9620493554277 -0.729773941461901 -1.17505403160791
741 1285 787.044357976654 137.334630350195 41.4745558425954 -7.45855753275702 0.995359563040563 -0.17900002582049
742 526 777.507604562738 699.859315589354 -23.1066403664593 8.08929121738938 -0.554542779090437 0.194137181408443
743 1057 786.119205298013 455.625354777673 34.7792018263947 -5.15286006324892 0.834675873665811 -0.123664941956944
744 634 781.976340694006 624.864353312303 -9.99693287461761 4.78911252250913 -0.239919211566475 0.114935262136335
745 418 781.069377990431 677.299043062201 42.5418126342034 25.2290650054891 1.02097295978865 0.605479446605549
746 225 777.262222222222 195.462222222222 -15.4304379172495 16.7776191923167 -0.370319431536 0.402650814911784
747 1452 790.765151515152 548.524104683196 9.68151565536457 30.9300705274962 0.232349424762182 0.742299486024728
748 769 789.830949284785 909.759427828349 15.4362797593628 -11.5779255561384 0.370459631552493 -0.27786190082929
749 1374 790.022561863173 41.9636098981077 0.877349566026446 -0.273048903550735 0.0210557596804215 -0.00655297764630519
750 367 781.242506811989 76.7384196185286 23.2588939252663 -2.38307587558057 0.558196755189437 -0.0571921100544797
751 497 783.006036217304 654.923541247485 25.8972471808733 -15.5334290873238 0.621515339084929 -0.372791145673971
752 1002 792.738522954092 349.411177644711 37.9768614554026 -74.5655956245403 0.911417408961841 -1.78952075967686
753 1233 800.585563665856 307.942416869424 -26.4642450532589 35.4463384927088 -0.635122880938893 0.850686674678144
754 895 793.594413407821 104.706145251397 16.2382433557621 4.65343514881783 0.389706182086173 0.11167910257903
755 1146 790.303664921466 258.232111692845 16.654107221519 -15.5150922320969 0.399686616289619 -0.372351074313702
756 764 789.065445026178 593.047120418848 26.8082547856051 37.1704935129512 0.643378867529063 0.892065157285067
757 687 794.644832605531 220.029112081514 -11.9258917843104 -32.515267567089 -0.286212840478666 -0.780343076862699
758 253 788.889328063241 517.545454545455 20.5723658583253 -17.510713761793 0.493722010409645 -0.420244558244699
759 1460 801.633561643836 381.744520547945 18.1881813067742 -25.8423955573116 0.436503292927859 -0.620198939500865
760 161 791.39751552795 201.596273291925 9.03283911368387 0.518449325124568 0.21678165348737 0.0124424115757419
761 367 797.433242506812 7.69754768392371 3.96672980872872 12.6440825017849 0.0951986674456721 0.303448902063948
762 216 791.481481481482 187.981481481481 15.8367821232593 -16.2394505667684 0.380071400740274 -0.389735154283594
763 929 807.86329386437 278.779332615716 27.2997955625711 13.2259375343646 0.655175493268332 0.317413005095683
764 1036 806.603281853282 939.368725868726 5.74444047338038 -46.5519382360446 0.137862447067465 -1.11721309511246
765 656 802.693597560976 681.565548780488 -17.8455141067913 5.61661912584692 -0.428279526150518 0.134794826497614
766 776 808.211340206186 632.618556701031 5.68219323615998 -38.844744887954 0.136368558065366 -0.932245988235192
767 205 798.019512195122 613.346341463415 26.7282193307002 -47.8961678911339 0.641458074073812 -1.14947364172793
768 217 799.654377880184 429.235023041475 -20.0576555791915 -60.5251718116221 -0.481369333253186 -1.45256066866661
769 975 805.437948717949 496.631794871795 32.4420123799975 -37.4445764145988 0.778585004966989 -0.898642950143325
770 751 808.557922769641 84.4314247669774 -6.29933327741435 3.53239825137324 -0.151179475971976 0.0847750219029732
771 1221 812.042588042588 176.769860769861 4.99307536511296 -26.7741816800971 0.119830223921125 -0.642561137460089
772 658 815.641337386018 444.595744680851 25.5432204569399 -60.940297639043 0.613018951888489 -1.46252339047988
773 389 805.264781491003 656.737789203085 -35.1929755660578 -19.0650569332817 -0.844606146343638 -0.457547678400098
774 726 813.006887052342 530.454545454545 -10.7962252748779 -4.45754904395709 -0.259101655310637 -0.106977976701278
775 494 808.125506072874 579.935222672065 2.84067098922826 0.134700649940909 0.068174064245827 0.00323271888854717
776 753 813.796812749004 702.03187250996 22.4369539177542 -27.5157232250973 0.538470785131367 -0.660357602140966
777 1100 816.321818181818 52.9736363636364 5.04770581990288 25.4576102953418 0.121141315613458 0.610964369475032
778 779 819.075738125802 228.616174582798 -3.96568226860229 -25.3666994256906 -0.0951735272347323 -0.608782573874012
779 1043 821.387344199425 419.015340364334 2.22345408668081 3.84074230586403 0.053361301723367 0.0921750578312399
780 498 820.056224899598 611.666666666667 20.4478449086315 18.312453378445 0.490733597018383 0.439485733425254
781 684 819.054093567251 116.099415204678 10.2217768941351 -18.8536875167675 0.245315306605289 -0.452474964159101
782 914 822.950765864333 469.40590809628 12.2040407206931 -46.2389700475967 0.292888215251303 -1.10970208328918
783 276 815.503623188406 143.434782608696 11.6103256470122 59.4090189370941 0.278639479748207 1.42577380103401
784 831 831.296028880866 915.421179302046 -6.07496469019863 -39.2621958662853 -0.145794790967062 -0.942264512000936
785 433 818.591224018476 13.5519630484988 5.11025931253254 -12.4099815779647 0.122642554525499 -0.29783064796798
786 1041 829.296829971182 255.539865513929 -2.3482666593157 16.2429408603622 -0.0563567138558397 0.389818918823944
787 1184 829.689189189189 359.974662162162 -16.8239063134568 82.2197737555205 -0.403761672586722 1.97321553940643
788 593 825.671163575042 894.898819561551 -8.58892251737745 8.34125731749254 -0.206127973891548 0.200184186908672
789 1407 833.709310589908 558.872068230277 -1.11118383807202 -79.1111056217439 -0.0266676143252432 -1.89860973610338
790 723 830.98755186722 598.502074688797 -49.155794959744 -18.8025290473217 -1.17970378700939 -0.451247197622272
791 403 822.272952853598 654.930521091811 0.758417363755263 -7.5020339325394 0.0182014722147914 -0.180043428200836
792 1233 834.576642335766 201.255474452555 -2.12195526323466 -0.0736672410820177 -0.0509254028330229 -0.00176796089564132
793 913 834.485213581599 328.308871851041 48.7695800782125 10.0283893380692 1.17043490714049 0.240674144104748
794 812 837.259852216749 405.135467980296 -18.1437053337372 -55.9782655142857 -0.435435901507059 -1.3434381820394
795 1024 834.7265625 508.30078125 -2.96185702118455 -4.03522585925973 -0.0710824420057344 -0.0968425234808108
796 241 827.746887966805 679.705394190871 -13.4543963002335 40.279122508958 -0.322895851451676 0.96667002130974
797 1303 837.509593246355 148.376055257099 -23.3233767225791 -45.8823367478364 -0.559744296028704 -1.10114314014432
798 622 836.011254019293 305.631832797428 -54.6857292651726 -11.5666669960404 -1.31241824005343 -0.277591703470163
799 554 834.635379061372 35.1859205776173 -21.0261620940207 4.63715989323802 -0.50461279425759 0.11128850813014
800 907 836.977949283352 81.8500551267916 29.1730195030879 -10.1877000588411 0.700131522935926 -0.244497487024128
801 175 831.645714285714 932.354285714286 5.68560123826617 39.8688072005797 0.136450347669096 0.956822748499724
802 449 839.142538975501 10.162583518931 13.175495229466 -1.72838496080847 0.316202425993808 -0.0414799981435687
803 887 845.465614430665 640.412626832018 35.8171647999385 25.8738317424523 0.859586239812221 0.620953385374235
804 701 848.134094151213 941.736091298146 47.8673971959279 -0.219304545940695 1.14878316569927 -0.00526315165010527
805 662 846.5 283.419939577039 -10.4350900176698 -53.3362085921893 -0.250434668419267 -1.28003071280726
806 724 845.67955801105 665.882596685083 18.3688952582389 22.0467234865068 0.440840298017146 0.529105534952301
807 857 848.981330221704 113.821470245041 -41.9799969532179 2.41887741625953 -1.00748978680767 0.0580513213266061
808 906 851.129139072848 479.923841059603 -40.0619784602838 9.50194529813874 -0.961458720042875 0.22803986511357
809 586 848.955631399317 690.930034129693 3.27563429838382 23.2738401997693 0.0786128713781535 0.558555455046643
810 399 848.636591478697 48.9398496240602 4.82090633203954 4.72467808576675 0.115698290738297 0.113388881916036
811 838 855.072792362768 452.128878281623 20.6492274851491 46.1481069422999 0.495566634269639 1.10752143399837
812 874 859.427917620137 587.798627002288 20.1801378264389 -8.49161817289075 0.484308819249446 -0.203792739484752
813 836 855.897129186603 528.497607655502 -38.7888778033529 -62.9358699054061 -0.930905218315246 -1.51041569212625
814 1478 859.420162381597 253.957374830853 -7.18864141027165 42.9406754025393 -0.172522232670534 1.03054537986014
815 1330 856.744360902256 372.53984962406 5.559079006979 -40.870839053815 0.13341390495644 -0.980870793555934
816 790 858.478481012658 617.077215189873 -10.3206060713155 -23.9058745346737 -0.247687135901961 -0.573723825307307
817 529 857.40831758034 163.533081285444 -20.3648142724237 -42.1929914754392 -0.488740921362292 -1.01260150241887
818 765 861.407843137255 16.3228758169935 65.3445765491461 1.10118113797873 1.56822292221462 0.0264275567045695
819 835 862.959281437126 423.405988023952 19.6464042085815 -54.450299130939 0.471499595621666 -1.30676808586186
820 1111 864.322232223222 70.7722772277228 40.1794269732793 -27.2681541349613 0.964277400031122 -0.654416121723061
821 430 861.320930232558 301.937209302326 -5.07967915889841 -0.821456757960563 -0.121908652793688 -0.0197143724157885
822 1148 870.661149825784 562.562717770035 -17.9028832576506 45.830528246054 -0.429656344582234 1.09989977329811
823 1209 868.393713813069 195.736972704715 -11.0536883877705 -56.215917527045 -0.265280585171164 -1.34914165972036
824 1374 876.213245997089 329.128820960699 20.7342926057314 38.8226644526634 0.497608136090036 0.931716073641147
825 1422 879.845991561181 224.530239099859 16.0282875876582 9.61799237849327 0.384667394392078 0.230824911724611
826 1530 883.434640522876 919.928104575163 -6.08681242621184 -47.6279884497963 -0.146079128125148 -1.14303752767865
827 888 878.849099099099 42.6441441441441 -13.5449556698251 1.92731649351072 -0.325069211303631 0.0462542121030138
828 898 875.369710467706 519.241648106904 19.7061335123684 4.6672414370497 0.472933056029144 0.112010443584196
829 425 869.567058823529 676.444705882353 -35.3637370091013 9.90296394880082 -0.848704298376345 0.23766402481305
830 736 874.341032608696 129.611413043478 53.5338879771876 -21.2527212507994 1.2847748761208 -0.510050051359267
831 925 878.290810810811 399.015135135135 -21.4423933793932 -47.8363937392298 -0.514602046268014 -1.14803910499784
832 1293 881.337973704563 96.4601701469451 2.37012964386568 -1.94503961760853 0.0568814097882331 -0.0466795543568202
833 855 881.795321637427 168.574269005848 36.9375141326091 13.0105469097767 0.886473819427349 0.312243784747995
834 1075 886.628837209302 486.238139534884 -5.60073438942105 -7.23149625583321 -0.134413604228041 -0.173550718195833
835 802 878.655860349127 646.014962593516 -24.8520321929924 -25.4502768210719 -0.596430929801102 -0.610788371357716
836 521 882.303262955854 694.660268714012 11.5439424870408 16.1554882646685 0.277046331569521 0.387720119314991
837 148 873.763513513514 451.47972972973 -24.4819904737222 8.78008577491797 -0.587550194214749 0.210715754824443
838 574 879.601045296167 609.756097560976 -13.513100797142 -19.5897735166327 -0.324304717229845 -0.470140499673617
839 1390 886.81726618705 293.204316546763 -8.72971756406093 30.2406763832477 -0.209506953926368 0.725754521522005
840 267 882.584269662921 438.052434456929 41.05262927065 -48.2550200162446 0.98523362824139 -1.15808583508817
841 481 886.841995841996 143.777546777547 15.8823178321061 -28.2844665235671 0.381164225059659 -0.678806889375271
842 1206 892.255389718076 351.307628524046 -38.7691386707586 22.3789570721117 -0.930431493304941 0.537078902475515
843 841 893.247324613555 461.665873959572 45.9250720644541 -43.1116777481021 1.10216875706078 -1.03464931338035
844 472 889.334745762712 672.192796610169 -16.7627989245698 34.7041458698057 -0.402295139126256 0.832874584595048
845 534 889.447565543071 9.47565543071161 46.1794803429281 -8.28760535486072 1.10827437308852 -0.198896578325613
846 1345 909.020817843866 373.829739776952 6.02452346874804 -24.8116601790836 0.144584237867161 -0.595462030452889
847 1277 907.199686765857 408.673453406421 26.8594207415166 -5.00776062285886 0.644606813735696 -0.120182659563561
848 896 900.885044642857 566.191964285714 2.746945261238 -7.96244280201148 0.0659247140656322 -0.191092910511797
849 1554 908.235521235521 29.2245817245817 14.0254077293882 -19.5724963490671 0.336599715786515 -0.469725860056402
850 932 904.055793991416 510.864806866953 24.5624615452348 -36.4858882468985 0.589481442155827 -0.875635122420809
851 1056 910.389204545455 540.92803030303 8.27220377789144 5.71058569946703 0.198526951536107 0.137049956800007
852 1294 912.795981452859 256.982998454405 43.8438041332638 -30.5631573747745 1.05221982098484 -0.733493833789343
853 761 903.73455978975 614.371879106439 15.4295395079923 13.8697985059059 0.37029787035885 0.332865206144549
854 538 906.540892193309 588.845724907063 57.424769931925 -19.0430471791056 1.37815324952661 -0.457019460102053
855 688 908.082848837209 890.829941860465 -12.0365941325577 -31.8092346774464 -0.288869617356449 -0.763398794416516
856 1126 907.476021314387 229.747779751332 27.4013372926501 -78.0058952059922 0.657612421887061 -1.87208547962513
857 525 903.929523809524 635.184761904762 47.1923250997566 9.6450565696569 1.1325819200677 0.23147443288146
858 1169 910.244653550043 105.721984602224 6.66060468586294 -35.7299915649295 0.159849730395367 -0.857494144759132
859 953 911.96222455404 660.91185729276 -26.4992713081975 -36.8471665975228 -0.635963485909876 -0.884305543451433
860 826 911.398305084746 72.4358353510896 -40.9485296251334 29.211059395341 -0.982735311488648 0.701044453038779
861 805 910.983850931677 443.104347826087 33.8677510823039 -6.54437307557146 0.812801710195217 -0.157060255198325
862 1355 910.631734317343 155.642804428044 49.3701495302956 -36.8052710572889 1.18484814280406 -0.883300080565251
863 1382 923.159189580318 191.317655571635 37.9085271634712 -83.6787647342534 0.909777435016956 -2.008230275395
864 613 916.306688417618 283.417618270799 32.028496866948 12.4436988975161 0.768660929542493 0.298639839429437
865 662 918.658610271903 313.906344410876 17.6284911539779 6.51195707619614 0.423071131097371 0.156282294486794
866 522 924.346743295019 341.831417624521 -11.2057298520643 -9.45981734484802 -0.268929471154122 -0.22702882448089
867 940 931.864893617021 602.487234042553 -22.2145337163529 -7.89859399103342 -0.53313285998713 -0.189560584889385
868 874 923.510297482837 488.199084668192 -14.3922573165336 7.21236913662923 -0.345403842493706 0.173091681067494
869 381 923.485564304462 860.396325459318 -7.71528885643452 -16.0696233855394 -0.18516139326525 -0.385659423863669
870 646 932.029411764706 676.320433436533 -32.8471115666934 -56.161057796951 -0.788307094601609 -1.34782506558534
871 413 929.220338983051 129.140435835351 7.98224371102781 -37.9638866299999 0.191568118111876 -0.911106022467616
872 926 933.467602591793 880.161987041037 10.903521452041 -20.6939342878619 0.261676686527905 -0.496639565436932
873 921 934.167209554832 30.6829533116178 -7.6073252041304 21.7753066052301 -0.18257034312382 0.522591724668841
874 1264 938.939082278481 430.034018987342 58.1351628735383 -18.5029140453906 1.39520217008974 -0.444056652688304
875 1159 938.02415875755 561.955996548749 -13.8105179559205 -24.4904094027924 -0.33144251550612 -0.587752242467957
876 803 933.646326276463 633.777085927771 16.4878742649496 24.8390494770008 0.395697144681008 0.59611935393841
877 227 927.859030837004 522.79295154185 -9.02339340894004 8.36393722499638 -0.216554963355181 0.200728488405438
878 676 935.007396449704 65.5547337278107 -35.8410419526958 41.456140627251 -0.860159274335492 0.994917611093733
879 836 940.346889952153 399.125598086124 31.6159801251642 -25.8468076055873 0.758760823911292 -0.620304825491795
880 748 939.260695187166 700.299465240642 41.4203016014856 -60.9640823076816 0.994057500206446 -1.4630942054507
881 922 943.204989154013 217.572668112798 23.7435075092641 -22.2217852912193 0.569827133270934 -0.533306892577564
882 1004 942.601593625498 154.333665338645 28.6524724878278 -52.5081319318665 0.687638768302994 -1.26015746748762
883 1368 945.281432748538 108.199561403509 -34.701279489807 -7.21068097131375 -0.832805793533032 -0.173051166311963
884 1192 945.415268456376 302.190436241611 87.4002516487741 -4.45615176471448 2.09754328945491 -0.106944443002649
885 757 946.281373844122 465.750330250991 44.4247205704589 0.381485487917802 1.06616139840122 0.0091553778176981
886 320 945.375 5.78125 39.7045455666138 -12.4839201016505 0.95288058721826 -0.299605119451342
887 832 947.605769230769 367.118990384615 -8.8232043514162 -18.4449314697864 -0.211750569702873 -0.442665112503126
888 1017 949.500491642085 724.846607669617 40.6371146382791 -52.5385852712688 0.975261575388471 -1.26088832576891
889 1226 946.163132137031 262.767536704731 -19.5220314511145 -52.3123373497276 -0.468514738737453 -1.25545853808948
890 383 947.11227154047 329.610966057441 16.1689887109863 14.4348900458894 0.388044120333803 0.346426997389538
891 695 949.723741007194 523.565467625899 20.4053533371716 -49.5175941150971 0.489713829810707 -1.18838670697959
892 328 943.146341463415 888.810975609756 4.38783234292622 -23.7561189782216 0.105304825930524 -0.570129799471351
893 109 938.880733944954 347.128440366972 -32.8069484196573 0.439275012243346 -0.787343207908381 0.0105422849107915
894 716 946.110335195531 497.638268156425 25.0687687192319 -18.9715825357006 0.601632450822121 -0.455304359969276
895 821 952.987819732034 655.761266747868 20.9175194496626 -43.9719693879592 0.502005448794355 -1.05529569507967
896 415 952.939759036145 445.932530120482 52.5452301219301 -20.3888588305448 1.26104779741403 -0.489317973494104
897 527 954.46679316888 589.345351043643 17.5976550964158 -8.7825216939926 0.422331087855017 -0.210774215133335
898 174 951.224137931035 344.316091954023 9.79047622340493 45.7831620550425 0.234964400165533 1.09876301872099
899 1664 966.022836538462 36.6736778846154 50.2543432822214 -21.6114804429392 1.20606815803219 -0.518660014394923
900 434 958.39400921659 196.804147465438 -2.524243680457 -14.301930480191 -0.0605800360183038 -0.343236063272777
901 1077 973.102135561746 67.7678737233055 21.3738341508255 4.15035415706231 0.512956674005356 0.0996055199702558
902 1220 967.86393442623 686.92131147541 61.4318050838398 -17.4086770469529 1.47431921627102 -0.417795750347088
903 249 957.927710843373 180.429718875502 16.1279425882751 -11.6850050401317 0.387059042858317 -0.280431731566059
904 974 967.242299794661 539.909650924025 -12.6584174714029 -10.6095678516353 -0.303792931042807 -0.254622011165871
905 912 972.36951754386 91.8135964912281 56.3955905980814 9.84827535359831 1.35345368442668 0.236351537792558
906 253 961.343873517787 606.355731225296 -43.3028479359572 0.219066337452359 -1.03923726063582 0.00525743481741
907 915 966.348633879781 634.550819672131 -36.4170440304461 1.2109889610163 -0.873982910653527 0.0290628656195563
908 1007 976.078450844091 743.172790466733 0.556069258612029 1.59652029885074 0.0133452629697341 0.0383153409304845
909 514 963.151750972763 863.210116731517 -34.8368146894893 -28.4831620781343 -0.836058541016198 -0.683575440028897
910 635 971.976377952756 221.11811023622 42.05299733651 -14.9161973267258 1.00924174359513 -0.357978026568963
911 1234 974.821717990275 477.967585089141 -25.0262759831003 -43.0301425446883 -0.600612655663159 -1.03269252703765
912 835 979.108982035928 239.302994011976 37.7886187185669 -0.00136639957460766 0.906899718429037 -3.27926087667339e-05
913 377 965.901856763926 570.164456233422 27.0415041795636 22.3391946532499 0.648976685519718 0.536124632970763
914 1261 976.692307692308 332.412371134021 -42.1014775917338 43.8233552743839 -1.01040523491349 1.05172906305324
915 1511 975.590999338187 398.927862342819 1.47096125622242 5.89009596158367 0.035302014054107 0.141358074209144
916 267 969.794007490637 7.56928838951311 9.23419782738395 3.59998457897784 0.221614118048137 0.0863970452410254
917 1080 972.412037037037 153.111111111111 22.2948695235243 -18.3899656190279 0.535060861681137 -0.441345971548349
918 1150 973.297391304348 772.961739130435 6.28905714401461 4.24859780070688 0.150932856148262 0.101963296882459
919 919 975.706202393906 265.107725788901 14.6173464695483 7.67192610144074 0.350805820560456 0.184120718278238
920 915 977.113661202186 363.16393442623 -5.87383538178945 34.2534062895082 -0.140967831968572 0.822057158282088
921 1159 981.716134598792 122.4659188956 -6.16286884496405 -46.4037304628846 -0.147904427569533 -1.11365621496427
922 728 977.815934065934 436.909340659341 9.83420339995892 -39.8690899475575 0.23601382100835 -0.956829534224191
923 936 979.551282051282 824.965811965812 -19.0696542254325 -11.7358659461218 -0.457658010111032 -0.281652356793592
924 1247 996.250200481155 280.381716118685 18.0284159284063 -43.7889325198354 0.432669038552604 -1.05090294165833
925 426 982.030516431925 305.988262910798 6.79819434471741 -0.57165026620256 0.163151783423639 -0.0137191959653255
926 1393 999.305096913137 805.288585786073 8.04547361801284 6.54477653886431 0.193085590482806 0.157069938027682
927 338 978.097633136095 199.210059171598 4.34424176468529 -0.872127570626716 0.104258683349148 -0.0209304355400256
928 1025 987.433170731707 508.840975609756 44.497183714222 36.568794032797 1.0679004618257 0.877624801759115
929 654 977.839449541284 593.845565749235 -34.6720632726651 26.599620707087 -0.832104625297779 0.638371799436105
930 452 981.37389380531 174.984513274336 -65.6145171233302 -20.6372016558833 -1.5747013021878 -0.495278023001355
931 569 985.912126537786 709.467486818981 53.3163592825576 -33.2590899785553 1.27955434362716 -0.798194280701185
932 466 989.221030042918 847.030042918455 41.1921337107613 -1.04649581412243 0.988581634645083 -0.0251151481940378
933 1191 997.171284634761 567.900083963056 -8.12884713328123 -18.859829491044 -0.195086494990178 -0.45262236713203
934 1433 997.30565247732 672.6741102582 6.03531705287458 -12.9478639294029 0.144843276136808 -0.310739438223063
935 398 993.51256281407 723.48743718593 7.80610199365659 -13.8206152647565 0.18734084335814 -0.331684843668693
936 73 982.150684931507 13.3698630136986 -20.4021821333405 7.09026916081211 -0.489637723195566 0.170161369311105
937 724 995.790055248619 444.204419889503 -9.23550689156547 -46.2733437749756 -0.221645534648635 -1.11052702806722
938 702 993.488603988604 636.763532763533 -21.1735454411149 14.6744376767016 -0.508149888772114 0.352175968542781
939 1296 1001.60262345679 610.990740740741 15.1463877021873 -2.45735643069905 0.36350243031195 -0.0589747900466596
940 814 1003.33783783784 11.1732186732187 4.86641536777461 -17.8154707759698 0.116790474922152 -0.427558507780792
941 663 996.515837104072 539.443438914027 -7.05750625412128 6.45739941073205 -0.169375083073068 0.154972949686022
942 681 1002.84434654919 778.546255506608 5.64244764455771 -8.70461118729077 0.135414692402761 -0.208904418909325
943 993 1005.59617321249 174.580060422961 -30.6244263744295 -25.2041358858685 -0.734964245792209 -0.60488116563283
944 1104 1007.65036231884 413.32518115942 1.13890328367028 35.4853674252053 0.0273328611180751 0.851623341036746
945 1070 1006.13271028037 206.46261682243 20.2330088851777 28.170661046041 0.48557768669973 0.676075639622727
946 1102 1005.16333938294 45.8829401088929 13.3544244171902 -5.18075339344147 0.320496598034716 -0.124334361855197
947 916 1006.3711790393 482.300218340611 -19.5315967252481 15.3878078892744 -0.46874429844915 0.369296341471365
948 261 997.770114942529 325.616858237548 -15.1788191162498 -6.49651026431403 -0.364280760964907 -0.155911582091857
949 1022 1005.67612524462 85.0176125244618 5.16269975924414 -46.5036859477051 0.123901087596295 -1.11605507483565
950 947 1009.74868004224 242.418162618796 -42.0325380043422 7.64013078164607 -1.00875073431214 0.183357653431017
951 506 1006.65415019763 306.310276679842 -3.65589815264463 -82.972589968112 -0.0877389308651711 -1.9912825880147
952 962 1009.76195426195 133.202702702703 -40.9410263256147 7.95714483641434 -0.982555237687287 0.190965763141207
953 216 1002.86111111111 752.537037037037 -0.754350670628911 14.9106902681102 -0.0181038744994927 0.357845861116051
954 429 1009.21678321678 384.540792540793 30.1223902941081 23.3116965771788 0.722915740307648 0.559463980925004
955 251 1006.39442231076 840.494023904383 18.8200192347205 3.22073974387287 0.451666949562543 0.0772954414821303
956 541 1011.65434380776 364.702402957486 44.6134514555915 34.6022227674221 1.07069080414268 0.830428503314821
957 666 1012.41291291291 732.665165165165 20.8548984643401 -36.8478135795822 0.500502590106144 -0.884321070556349
958 719 1012.12934631433 336.229485396384 -23.2070323414703 -40.8420543589727 -0.556952114413013 -0.980179981546054
959 432 1015.33101851852 454.354166666667 -58.5086050312931 -5.53283411421511 -1.40416451375833 -0.132784046372959
960 522 1015.75287356322 536.72030651341 -28.0053200633132 -37.6853680380541 -0.672107574745907 -0.904421776226861
961 438 1016.26484018265 699.547945205479 26.0881813725174 -31.7849108927552 0.626097622600771 -0.762815041047496
962 327 1016.36391437309 506.217125382263 -1.20083349863569 3.25381842653924 -0.0288191418136643 0.0780893061168647
963 270 1016.65925925926 763.222222222222 -16.7911461437566 -12.2903662948973 -0.402975452034496 -0.294959967053668
964 167 1017.20958083832 28.2994011976048 -37.6971803219943 -11.107140350926 -0.904705262560647 -0.266563393910383
965 285 1017.27368421053 101.775438596491 6.45119097588788 -6.25132459888792 0.154823951707186 -0.150027302155779
966 222 1017.6036036036 291.734234234234 -14.5414775750424 -51.3619260863222 -0.348985021563347 -1.23264935012753
967 272 1017.3125 659.650735294118 -54.6134799851559 -7.88362611756496 -1.31068430920531 -0.189201366672516
968 169 1016.44970414201 640.189349112426 -38.6237142427374 -31.895773819781 -0.926941411441741 -0.765475671700674
969 99 1018.9898989899 156.010101010101 -21.693893899906 -17.2416800262818 -0.520637878192345 -0.413787941748602
970 123 1018.49593495935 826.821138211382 -6.6849951135416 -12.8888757806407 -0.160435083148239 -0.309323765004057
971 248 1018.15725806452 580.048387096774 -44.6170357853586 -12.6094156574812 -1.07077682548367 -0.302616922690157
972 117 1018.95726495727 602.641025641026 -24.0174758719724 22.896625470609 -0.576402177276883 0.54950257237288
973 96 1018.63541666667 840.739583333333 10.6591067640616 -0.0274662888944687 0.255810909497016 -0.000659171213697882
974 61 1020.27868852459 789.377049180328 -19.7708796115384 -1.98152742516142 -0.474486915923942 -0.0475552355412068
1 79107 68.7399218779628 307.996081257032 -2.10720554399938 9.52086129634446 -0.0531678453538581 0.240225108784985
2 423 11.1820330969267 651.848699763593 9.41295090712197 -26.4944322799692 0.237502373500526 -0.668492868297088
3 335 6.66865671641791 685.05671641791 13.0988184139968 14.0499897818152 0.33050214476555 0.354501574879615
4 474 9.80379746835443 710.037974683544 11.3947478631486 26.1143314156542 0.287505978692635 0.658902373420914
5 778 18.0437017994859 734.700514138817 -49.2210225237762 -28.081095810774 -1.24191762932438 -0.708526685346716
6 783 8.72413793103448 774.249042145594 -41.0046650349437 -0.935713418304457 -1.03460703943805 -0.0236094036775921
7 178353 288.929516184197 863.037296821472 -6.52484924006855 11.2516910439264 -0.164631388874756 0.283896448116524
8 234 13.3803418803419 670.119658119658 -13.2290698015709 8.30363085720075 -0.333788575769581 0.209512623269419
9 910 32.2824175824176 633.661538461538 -55.109897620197 -62.1736905806259 -1.39050247019398 -1.5687321890751
10 335 24.1253731343284 752.546268656716 -12.9404208934356 -6.93506060853944 -0.326505546094092 -0.174981615345715
11 555 28.0918918918919 691.518918918919 48.6431179034748 -6.72630207087679 1.22733625942956 -0.169714335331977
12 267 28.123595505618 713.85393258427 62.7034035225617 -2.60748526169862 1.58209761318334 -0.0657906266198098
13 1190 42.4621848739496 669.973109243697 -13.8944404743806 35.0902965678205 -0.350576840747184 0.885378963932455
14 872 51.1915137614679 720.536697247706 -14.5629288738061 -6.77957904573937 -0.367443770479178 -0.171058590508451
15 441 55.2222222222222 697.283446712018 -5.22365450701309 30.955779845305 -0.131800362713424 0.781059123686389
16 501 55.5089820359281 640.796407185629 -4.0109687965562 -25.7018009497011 -0.101202547279609 -0.648493632764357
17 350 59.7114285714286 611.234285714286 -9.52413150861701 -5.33841036196134 -0.240307620973166 -0.134695819004678
18 644 69.083850931677 660.742236024845 -13.6774435935026 -4.823476439572 -0.345101695411864 -0.121703290947311
19 457 74.3873085339169 614.365426695842 1.39339017721731 -1.92349704241597 0.0351572506397585 -0.0485326140019902
20 875 87.024 634.268571428571 31.8965873083823 -7.32988090117567 0.804797057485532 -0.184943502699906
21 687 86.1630276564774 687.340611353712 54.0223853715835 17.9205845222721 1.3630629623494 0.45216228157911
22 1023 88.0977517106549 709.686217008798 48.2886183681562 -32.9327033752257 1.21839172313337 -0.830939765285183
23 1172 100.366894197952 664.613481228669 -8.37389853927283 33.9786035643533 -0.211285578577183 0.857329340649323
24 499 95.2024048096192 604.85370741483 -21.2423049803929 21.962030168398 -0.535974095822403 0.554133803878457
25 511 95.8434442270059 556.399217221135 -23.1501083349309 -5.6524779013025 -0.584110735367839 -0.142620197530498
26 612 100.764705882353 583.825163398693 39.9928775236076 -21.4774572528442 1.00907817630134 -0.541907327961005
27 163 99.6564417177914 507.822085889571 -0.828434752033529 17.080627647639 -0.0209026076774091 0.430968954074074
28 565 108.821238938053 521.104424778761 -15.1862197265242 -2.36204356594233 -0.383170300699334 -0.0595977774407063
29 772 117.598445595855 542.29274611399 -25.1093955904375 0.833506226531221 -0.63354638824053 0.0210305683182574
30 461 112.566160520607 630.58568329718 7.91542001616346 -6.5016474514639 0.199717501944051 -0.164045974171393
31 696 119.366379310345 72.8591954022989 11.1891054278386 10.5169699480544 0.282317322450776 0.265358371603398
32 1087 120.233670653174 187.778288868445 -0.295624305714325 -25.1235756333165 -0.00745902905097213 -0.633904171243259
33 294 114.037414965986 720.931972789116 4.32333210539024 2.95276977832181 0.109083925603427 0.0745026546586412
34 1044 126.161877394636 146.773946360153 24.2881565398481 7.03760876479881 0.612825338523939 0.177569053732468
35 588 120.481292517007 119.557823129252 -9.43579641308731 -40.3793138189327 -0.238078798677298 -1.01882852327032
36 743 123.398384925976 611.367429340511 -9.21079207607161 7.13184633863977 -0.232401613635495 0.179946804098001
37 618 120.692556634304 694.868932038835 21.923081920823 37.2410540514362 0.553151083227514 0.939645687749772
38 598 122.613712374582 571.369565217391 38.8950423703386 -15.708790605937 0.981378206633329 -0.396355520234358
39 659 127.229135053111 650.772382397572 -8.44798470832154 -5.48636343639212 -0.213154879837356 -0.138428889185403
40 523 129.780114722753 33.5105162523901 -28.3893353406271 16.4141277367875 -0.716304014759049 0.414152196786478
41 664 134.60843373494 234.941265060241 12.8884843021606 16.6425065979649 0.325195110735295 0.419914525956383
42 1063 144.526810912512 587.420507996237 -4.62173517508406 -21.0063562533386 -0.116613066890938 -0.530020767981562
43 1053 137.603038936372 503.599240265907 39.3349083418479 15.768169084816 0.992476661654116 0.397853725187062
44 758 139.980211081794 93.3786279683377 17.8242911622478 -1.85167655921987 0.449732660753102 -0.0467204792747049
45 692 139.290462427746 713.098265895954 -15.2991485336191 10.3345164495977 -0.386019657929206 0.260754805796618
46 550 139.472727272727 201.549090909091 -12.2073463735959 -19.756047339731 -0.308009015077135 -0.498473664685188
47 784 145.331632653061 660.142857142857 13.1806894845387 15.3334611143188 0.332567870356449 0.3868854139963
48 509 139.581532416503 534.73673870334 -3.30969739213072 -19.329688430301 -0.0835084548889767 -0.48771601238764
49 320 138.25 687.45 21.7538556358951 26.336020118464 0.548881259160055 0.664495900213425
50 603 144.258706467662 12.1791044776119 45.1409037766376 9.54395050428719 1.13897032872004 0.240807682915325
51 370 140.327027027027 118.854054054054 20.3837939100138 -14.8677689660255 0.514312619107673 -0.375135327160456
52 827 150.509068923821 165.26723095526 -3.21534182564105 5.22458421830588 -0.081127727398161 0.131823820674789
53 387 140.222222222222 283.919896640827 16.8096395380386 -23.5447544116487 0.424131531903753 -0.594068227002289
54 573 144.931937172775 61.935427574171 -17.3165109876218 -24.0029796414972 -0.436920632104475 -0.605629912679892
[truncated: 10,133 more rows]

## Sheet: polarity_tensor (Fig1D-crshcrsh
1 18296 102.830946655007 42.2597835592479 3.98544454439516 22.0216913462765 0.0727960265991152 0.402236591462681
[truncated: 13,891 more rows]

[truncated: 2 more sheets: border_enrichment (Fig1F), border_enrichment (Fig1- S1C)]
