# Supplementary material for: Celsr1 adhesive interactions mediate the asymmetric organization of planar polarity complexes
Source: eLife. 2021 Feb 2;10:e62097. doi: 10.7554/eLife.62097 (PMC7857726; doi:10.7554/eLife.62097)
Supplement: Figure 3—source data 1. [file elife-62097-fig3-data1.xlsx]

## Sheet: Fig3B
Border Enrichment
														Prism output
	WT						Crsh							Parameter
		cell pair	junction	non-junction	ratio			cell pair	junction	non-junction	ratio			Table Analyzed	Border enrichment_K562
	image 1	1	133.896	26.103	5.12953		image 1	1	155.25	154.198	1.00682			Column A	WT
		2	501.244	62.631	8.00313			2	125.857	94.857	1.32681			vs	vs
		3	395.861	109.102	3.62835			3	132.268	87.324	1.51468			Column B	Crsh
		4	418.743	200.608	2.08737			4	163.698	96.517	1.69605
	image 2	5	216.952	53.9775	4.01931			5	113.72	101.626	1.119			Unpaired t test with Welch's correction
		6	209.479	83.4377	2.51061		image 2	6	84.443	72.854	1.15907			P value	< 0.0001
		7	422.438	195.89	2.15651			7	58.893	50.114	1.17518			P value summary	****
		8	346.17	170.659	2.02843			8	61.74	58.586	1.05384			Are means signif. different? (P < 0.05)	Yes
		9	168.522	40.623	4.14844			9	76.036	49.862	1.52493			One- or two-tailed P value?	Two-tailed
		10	228.011	134.999	1.68898		image 3	10	231.927	101.235	2.29098			Welch-corrected t, df	t=4.874 df=38
		11	182.031	134.268	1.35573			11	202.094	104.483	1.93423
	image 3	12	102.435	19.928	5.14025			12	283.199	224.113	1.26364			How big is the difference?
		13	73.8035	24.7175	2.98588			13	272.987	186.194	1.46614			Mean ± SEM of column A	2.897 ± 0.2578 N=30
		14	59.0795	19.9575	2.96027		image 4	14	544.899	397.908	1.36941			Mean ± SEM of column B	1.542 ± 0.1041 N=33
	image 4	15	93.298	35.472	2.63019			15	414.742	310.318	1.33651			Difference between means	1.355 ± 0.2780
		16	60.114	22.135	2.71579			16	187.204	190.503	0.982683			95% confidence interval	0.7919 to 1.918
		17	50.258	17.176	2.92606			17	153.31	107.623	1.42451			R square	0.3846
		18	71.284	23.579	3.0232			18	205.983	109.443	1.8821
	image 5	19	218.622	50.25	4.35069		image 5	19	239.506	372.907	0.642267			F test to compare variances
		20	92.129	36.523	2.52249			20	190.313	145.811	1.3052			F,DFn, Dfd	5.573, 29, 32
		21	69.534	36.7087	1.89421		image 6	21	341.539	238.118	1.43433			P value	< 0.0001
	image 6	22	148.046	44.7495	3.30834			22	214.139	94.2625	2.27173			P value summary	****
		23	83.565	50.038	1.67003			23	152.267	110.365	1.37967			Are variances significantly different?	Yes
		24	62.33	39.46	1.57957			24	246.44	177.549	1.38801
		25	65.8473	37.2047	1.76987		image 7	25	359.899	148.502	2.42354
		26	59.769	30.611	1.95253			26	306.921	196.702	1.56033
	image 7	27	92.165	34.939	2.63788			27	346.422	249.753	1.38706
		28	68.876	32.402	2.12567		image 8	28	142.022	111.493	1.27382
		29	107.263	39.418	2.72117			29	196.711	117.381	1.67583
		30	71.103	57.459	1.23746			30	155.349	99.214	1.5658
								31	151.284	81.674	1.85229
								32	216.097	192.941	1.12002
								33	311.328	76.269	4.08197
