# Supplementary material for: Celsr1 adhesive interactions mediate the asymmetric organization of planar polarity complexes
Source: eLife. 2021 Feb 2;10:e62097. doi: 10.7554/eLife.62097 (PMC7857726; doi:10.7554/eLife.62097)
Supplement: Figure 4—source data 1. [file elife-62097-fig4-data1.xlsx]

## Sheet: Fig4E
Puncta Molecule Count
	wt	crsh		Molecule Count
	249	58		t-Test: Two-Sample Assuming Unequal Variances
	54	15
	101	12			wt	crsh
	11	14		Mean	190.694	65.2084
	271	11		Variance	57290.5	5297.58
	97	17		Observations	268	782
	31	22		Hypothesized Mean Difference	0
	72	20		df	284
	23	61		t Stat	8.44978
	293	56		P(T<=t) one-tail	7.69287e-16
	329	249		t Critical one-tail	1.65024
	161	78		P(T<=t) two-tail	1.53857e-15
	215	21		t Critical two-tail	1.96835
	649	16
	12	46
	819	13
	65	78
	18	50
	97	51
	361	54
	55	171
	126	70
	156	67
	111	17
	443	31
	163	22
	390	121
	54	66
	166	146
	642	35
	399	85
	74	17
	271	67
	11	63
	87	57
	26	66
	40	127
	292	35
	26	13
	655	19
	434	16
	56	39
	167	15
	94	14
	24	43
	125	47
	86	24
	127	24
	215	57
	13	39
	71	17
	12	328
	18	68
	464	23
	120	38
	633	142
	246	61
	26	49
	23	17
	53	15
	11	87
	462	76
	19	30
	50	42
	32	174
	45	51
	18	18
	32	260
	82	27
	35	25
	648	170
	31	33
	88	24
	12	41
	378	32
	148	17
	71	33
	175	65
	49	364
	60	11
	57	25
	524	19
	19	127
	16	14
	15	28
	332	27
	33	97
	69	58
	252	22
	104	59
	46	15
	25	191
	27	27
	338	13
	142	45
	48	15
	174	17
	37	258
	281	15
	12	19
	49	38
	255	89
	110	298
	166	89
	270	11
	11	22
	44	27
	45	16
	49	17
	245	16
	270	39
	71	47
	40	47
	257	25
	183	54
	56	15
	39	34
	690	16
	175	94
	46	32
	177	48
	20	18
	147	45
	162	18
	645	27
	115	56
	83	40
	242	20
	569	11
	414	22
	204	58
	163	47
	31	14
	346	19
	84	11
	17	19
	152	129
	79	179
	393	112
	128	39
	25	202
	218	87
	513	332
	348	18
	979	46
	287	34
	113	12
	12	15
	77	50
	1843	13
	359	55
	328	257
	106	12
	537	45
	1294	65
	80	64
	406	17
	95	137
	21	12
	93	22
	145	482
	206	51
	497	143
	179	130
	222	21
	36	36
	289	31
	100	98
	959	24
	32	112
	269	162
	108	70
	375	144
	859	223
	131	11
	209	89
	29	41
	185	13
	119	61
	555	56
	52	24
	19	46
	138	41
	148	29
	31	37
	48	164
	113	21
	347	62
	22	39
	38	111
	29	50
	297	90
	195	23
	12	12
	21	17
	11	83
	16	26
	233	28
	679	11
	463	110
	18	14
	70	26
	160	67
	18	14
	82	199
	18	15
	94	58
	73	24
	270	16
	44	302
	79	11
	28	20
	141	23
	131	15
	198	14
	23	155
	75	27
	59	127
	79	47
	37	58
	179	49
	145	33
	43	23
	1234	46
	1094	118
	257	32
	217	23
	213	33
	36	11
	36	21
	165	36
	61	55
	47	347
	249	25
	14	11
	37	27
	209	12
	33	51
	20	363
	131	363
	146	81
	117	31
	24	48
	335	20
	69	16
	200	288
	24	40
	50	157
	279	33
	13	40
	115	70
	210	59
	352	12
	37	30
	20	101
	166	201
	41	38
	65	162
	33	59
	593	32
	12	12
	247	14
	236	86
	207	37
	778	24
	800	90
	140	20
	169	49
		23
		282
		29
		39
		45
		13
		12
		93
		140
		125
		59
		58
		117
		101
		102
		29
		214
		170
		48
		25
		11
		217
		11
		50
		250
		12
		68
		254
		217
		61
		33
		542
		20
		34
		52
		18
		20
		140
		159
		42
		89
		113
		78
		11
		14
		20
		16
		132
		22
		12
		20
		20
		298
		99
		28
		39
		21
		28
		198
		21
		15
		44
		67
		61
		171
		252
		11
		192
		13
		165
		34
		200
		67
		48
		38
		92
		12
		11
		29
		148
		14
		245
		46
		16
		77
		104
		34
		25
		42
		69
		162
		199
		34
		167
		54
		83
		251
		33
		45
		37
		108
		162
		16
		37
		37
		13
		47
		16
		83
		25
		91
		47
		128
		64
		18
		21
		172
		21
		29
		247
		21
		112
		118
		36
		14
		106
		231
		17
		16
		68
		20
		278
		27
		277
		44
		64
		55
		38
		45
		353
		56
		11
		70
		88
		174
		22
		125
		144
		29
		59
		19
		13
		26
		41
		50
		13
		64
		21
		107
		14
		43
		25
		25
		29
		29
		51
		17
		72
		421
		58
		29
		31
		88
		58
		12
		91
		52
		15
		61
		137
		58
		77
		53
		44
		73
		17
		98
		16
		46
		33
		147
		13
		31
		30
		108
		96
		55
		113
		243
		17
		29
		65
		193
		30
		164
		14
		92
		32
		47
		80
		12
		20
		102
		86
		60
		13
		143
		12
		18
		57
		130
		49
		111
		31
		89
		13
		52
		46
		265
		43
		16
		13
		15
		52
		21
		22
		67
		22
		45
		96
		34
		42
		94
		14
		50
		87
		30
		16
		256
		101
		29
		48
		46
		27
		84
		25
		74
		268
		21
		32
		252
		39
		57
		41
		148
		59
		41
		40
		31
		83
		11
		130
		25
		36
		12
		32
		58
		28
		12
		17
		18
		63
		27
		25
		77
		72
		76
		32
		12
		15
		33
		217
		170
		73
		21
		11
		29
		88
		38
		13
		14
		85
		26
		45
		69
		16
		186
		47
		17
		45
		31
		71
		166
		34
		41
		29
		30
		88
		42
		14
		149
		11
		20
		126
		18
		137
		15
		26
		57
		12
		53
		58
		86
		18
		163
		16
		40
		16
		26
		35
		11
		23
		37
		260
		89
		25
		24
		45
		37
		12
		21
		36
		22
		34
		391
		19
		12
		20
		89
		20
		68
		29
		28
		41
		17
		37
		43
		82
		20
		84
		21
		14
		11
		17
		58
		130
		77
		65
		13
		72
		12
		102
		56
		97
		15
		19
		20
		42
		13
		18
		60
		12
		137
		20
		17
		23
		15
		12
		75
		82
		80
		36
		37
		31
		58
		68
		24
		29
		35
		43
		11
		24
		25
		21
		31
		16
		18
		116
		32
		40
		27
		151
		74
		341
		11
		17
		43
		12
		17
		32
		35
		283
		13
		39
		73
		37
		74
		17
		18
		14
		12
		75
		73
		49
		407
		169
		198
		24
		291
		79
		78
		220
		35
		22
		11
		125
		49
		51
		21
		51
		16
		167
		66
		49
		13
		22
		29
		78
		17
		224
		27
		53
		229
		24
		31
		63
		17
		75
		20
		47
		25
		42
		11
		51
		25
		24
		45
		36
		16
		18
		16
		12
		47
		25
		17
		16
		90
		26
		11
		66
		11
		35
		41
		21
		14
		18
		22
		20
		48
		172
		54
		29
		27
		145

## Sheet: Fig4F
Puncta Area
	wt	crsh		Area
	2131.5	2852.5		t-Test: Two-Sample Assuming Unequal Variances
	1613	1080.5
	2318.5	349			wt	crsh
	257.5	833.5		Mean	3759.53	2975.63
	2450	764		Variance	7.66414e+06	4.25731e+06
	2307	1793.5		Observations	268	782
	929	2017.5		Hypothesized Mean Difference	0
	3934.5	1634		df	374
	791.5	3016		t Stat	4.24874
	2406	4646.5		P(T<=t) one-tail	1.35852e-05
	2952.5	2955		t Critical one-tail	1.64894
	4180.5	6672		P(T<=t) two-tail	2.71704e-05
	2610	1206.5		t Critical two-tail	1.96633
	2720	1252
	920	2669
	8662	601
	1296	2887.5
	1665.5	4416
	5037.5	3561.5
	4603	4038.5
	1228	4809.5
	2634	3526
	8602	2277.5
	5026.5	2020.5
	2981	2992.5
	6013	1812
	3673	3813
	4526.5	3643
	4497.5	4863
	2074.5	1853
	3991	4816
	2282.5	2990
	4546	2524.5
	629	2690.5
	4623	2459
	1207	4290
	2283	5150
	3502	1546
	2406	1310.5
	5403.5	2136
	4724.5	688.5
	6628	3004
	6885.5	1204.5
	6408	775.5
	733.5	2403.5
	7115.5	4620
	2692	2308
	7309	2225
	2037	1983.5
	716.5	3370.5
	1833.5	2416.5
	439	5985
	875	6921.5
	2760.5	2696.5
	4438.5	4529
	3856	6208
	8258	3341.5
	964	3270.5
	2439	1762.5
	2652	474.5
	267.5	5108.5
	4917.5	2491.5
	918	2418
	1072.5	5091.5
	1540.5	3959
	1088	4904
	1792	1079
	1315.5	4299.5
	3019.5	2174.5
	830.5	1467
	5352.5	4359
	741.5	1872.5
	4497	1794
	1079.5	3462.5
	4665	2179.5
	2660	879.5
	6473	1812
	3865.5	5182.5
	4763	4795
	6474.5	884
	3214.5	1594
	6333	1789
	1353	5020
	1822.5	834
	1668	3537.5
	4513.5	3040
	1743.5	3428.5
	2887	2239.5
	3084	1867
	5001	4027
	3546.5	1786
	1955.5	4317.5
	3978.5	2792
	2794	714
	8336	2024.5
	2736	837
	3643.5	1765
	3726	4424
	4116	1278
	723	649.5
	2660	3009.5
	3935.5	7972
	2927	5336.5
	2357	4775.5
	5414.5	554
	828	1614.5
	1474	1465.5
	4844.5	1598
	2906	1114
	3248.5	1074
	4282	1319
	1625	2907.5
	1809	3551.5
	5060.5	1795
	3270	2502
	1579	910
	1004.5	3170.5
	4370.5	1694
	7409.5	4590.5
	3483	2694.5
	3774	2391
	3742	887
	10456.5	2861
	14521.5	1875.5
	3755.5	1975
	5819.5	2990.5
	3414.5	1185
	7028.5	1522.5
	7057.5	342.5
	9997	1422.5
	9478.5	3002
	9615.5	3932.5
	5254	1374.5
	21401	1518
	3846	914.5
	1637.5	1075.5
	7760.5	3151
	6750	5065.5
	5219	3311.5
	10491	3897.5
	1242	2562.5
	8524.5	3695
	8250	4411
	10649.5	434.5
	7902	2274
	7153	4063.5
	2384	423.5
	1006	1567
	3080	3212
	9092.5	873
	4068.5	2391.5
	12622	4346
	3294.5	622.5
	4318	1230.5
	7040.5	2975.5
	2345	3380.5
	5066.5	1234.5
	5593	3996
	2080	651.5
	2443	1445.5
	7925	3424.5
	3443	3163
	8860	4377
	6165	4661
	4940.5	1335.5
	1283	1546
	6664	1452
	5298.5	2737
	6411.5	1244
	1321	4259
	9552.5	3518.5
	2995	2552
	5748.5	3969.5
	3688	2745
	4790	843
	7857.5	4259
	1351	1987
	2113.5	747.5
	3741	946.5
	3567	3370.5
	3346	1568.5
	1431.5	3196
	2107	2933
	3569.5	1912.5
	609.5	2273.5
	1990	4053.5
	2757.5	1145.5
	2259.5	3137.5
	1843.5	2701
	1730	4131.5
	3240	1883
	2103.5	4250.5
	1446.5	1834
	642	822
	2469	1202
	621	3592.5
	1192	1129
	3530	1389
	3322.5	814
	2643	2535
	914.5	1080.5
	3055	2099
	3806.5	3077.5
	905.5	1245
	3433.5	5451
	1576.5	703.5
	4231	2547.5
	6261	2621.5
	7962	1699.5
	8481.5	4198
	7470	752
	1405	1164
	10100.5	1654
	6270.5	1429.5
	9006.5	846
	783	2637.5
	5930	1141.5
	4978	2767.5
	5140.5	2717.5
	2327	3048.5
	3368	1272.5
	2425	3458.5
	2853	1550.5
	7040	3373
	6423.5	4052
	8869	2221.5
	1799.5	953.5
	5268	2056.5
	657.5	1185
	2288	1104
	4541.5	1627
	2905	5119.5
	1258.5	11129
	3744.5	1436
	867	1171.5
	1334.5	2079
	4761	1006
	1305	2469
	1347	5746
	3440.5	4184.5
	2016.5	1638.5
	1952	1433
	1391.5	2064
	2045	684.5
	1431	742
	1981.5	2245
	750.5	5265.5
	2048	5166.5
	2387.5	2822.5
	435.5	5253
	2315	6529.5
	2180	5563.5
	3828.5	965
	3254.5	4416.5
	2049	9217.5
	3410.5	11579
	2534.5	8037.5
	1590.5	8050.5
	1125.5	7120
	2374.5	5173
	1259.5	1476.5
	1942	1279.5
	1908.5	9686.5
	2925.5	6201
	2867.5	2916.5
	2866	4355.5
	1924	2223
	1808	4135.5
		2894
		10970.5
		4362
		5660.5
		5088.5
		1338.5
		558
		9948.5
		7844
		7428
		6100.5
		5423.5
		9014.5
		13325.5
		6093
		3118
		12521.5
		6878.5
		6540
		3055
		1008
		6250
		863.5
		4082
		19383.5
		2639
		4197.5
		8472.5
		9180
		10093
		5187
		1961
		1800
		2768
		2954.5
		1615.5
		1037.5
		3636
		3230.5
		3282
		4692
		2970.5
		6873
		543
		909.5
		1019
		1967.5
		3141.5
		1826
		742.5
		1260.5
		2170
		9315.5
		4395
		2643.5
		3958
		1558
		3115
		2816
		1526.5
		1190.5
		1021.5
		4677.5
		5540.5
		5018.5
		6506
		997
		7044
		1108.5
		5014.5
		3103.5
		12807
		6151
		3649
		2256
		6374
		455.5
		592
		1924
		6382
		682.5
		11213
		5581
		1056.5
		2730.5
		6642
		4317
		1765.5
		3221
		3711
		4279.5
		4448
		3240.5
		2564
		3607.5
		4650.5
		5644
		2542
		3051.5
		5665
		3917.5
		5368
		1939.5
		2569.5
		2011
		112.5
		4133
		2064
		3699
		2440
		5506.5
		3550
		5968.5
		2659.5
		807
		2139
		4740.5
		4609.5
		2050.5
		7823.5
		3003
		4321
		3513
		2835
		1668
		3424.5
		4444.5
		1148
		1402
		3906
		2145
		4091
		3738.5
		7437.5
		2899
		7202.5
		3270.5
		2560.5
		4197.5
		4493.5
		2898
		727.5
		4182
		5533.5
		6266.5
		1461
		3623
		5673.5
		4510
		3039
		1530
		1733
		3499
		2795
		4109
		1794
		2261.5
		1631
		3102.5
		1431
		2307.5
		1749
		1834
		2795.5
		2486
		1960.5
		1359.5
		4015.5
		3826.5
		3485
		2126
		2897.5
		1597.5
		9736.5
		924
		3592
		3366.5
		735
		3267
		6470.5
		3242
		4100
		3020.5
		3827.5
		3239
		1177
		4936
		1361.5
		3670
		2811
		4792
		1775.5
		1435
		2127.5
		5507
		4982
		5420.5
		4435
		4785.5
		1740
		2591
		4785.5
		4773.5
		2309.5
		4271
		579.5
		4986.5
		2147
		4264
		9126.5
		972
		1386
		6230
		5212
		3806.5
		1469
		3561.5
		701
		1433
		6367.5
		5668.5
		3294
		3047.5
		3833.5
		2877.5
		1727
		3821.5
		3803.5
		4721
		3952
		1382.5
		318
		1306
		4008
		1569
		2543.5
		4882
		1221.5
		2615.5
		5147
		2619.5
		2465.5
		7454.5
		1651
		4669.5
		3248.5
		2421.5
		954
		4129.5
		7033
		2315.5
		3694.5
		2489.5
		2356.5
		8162
		3563.5
		2446
		7607.5
		825
		3294.5
		4593.5
		3151
		4353.5
		3047
		3810.5
		3397
		2581
		2271.5
		1836.5
		2449
		704
		3472.5
		2289
		3030
		663.5
		4000.5
		3081.5
		3344
		1026.5
		1168
		1662.5
		5643.5
		1036
		1149
		2201
		4431
		4378
		932.5
		1328.5
		2069
		2371.5
		3673
		3477
		4746
		1217.5
		64.5
		2026.5
		5175
		3525.5
		946.5
		1717.5
		2928.5
		2266.5
		1808
		3401
		802
		5255.5
		3435
		1083.5
		2813
		1862
		2322.5
		4981.5
		2428.5
		3676.5
		2067.5
		1611.5
		4428
		2207.5
		1073
		2909.5
		412
		2176.5
		2800.5
		1148.5
		5263
		1678
		1219.5
		3875
		628.5
		4692.5
		2345.5
		5356
		1789.5
		7348.5
		2365.5
		3748.5
		1595
		3156.5
		1309
		122.5
		1269
		2120.5
		2607
		3902
		3009.5
		654
		2055
		1716
		1400.5
		1370.5
		2125
		1650.5
		2160.5
		2890
		1344.5
		1502.5
		1447.5
		3098
		2056
		3771.5
		2251.5
		1407.5
		2002.5
		1625.5
		1203.5
		1560
		2170.5
		963
		3374
		1311
		1466.5
		886.5
		1014.5
		2289
		3497.5
		2360
		3176
		754.5
		2946
		452
		2227
		2542.5
		2276
		377.5
		1863.5
		855.5
		1936.5
		1322.5
		1382.5
		3750
		684.5
		2243
		1113
		735.5
		1451.5
		679
		410.5
		2418.5
		4306.5
		1929.5
		2066.5
		4041.5
		2357
		2286.5
		1848
		2669
		1482
		1751
		2647
		498
		1626.5
		837
		1616.5
		1520
		862
		1199
		2917.5
		1437.5
		3167
		1993.5
		3942.5
		4591
		2541
		1039
		767
		1752.5
		925
		1185
		2174
		1494
		4908.5
		1060
		4612.5
		2864
		3414
		2586
		2019
		1737.5
		537.5
		865
		1910
		3223
		1296
		6288.5
		5079
		3122
		1881
		2816
		3361.5
		1655
		3580
		2959.5
		539.5
		2181
		3410
		2242.5
		2213.5
		1832
		2236.5
		1151
		2822.5
		2949
		2618
		983.5
		1617
		1601.5
		2488
		1703
		3589.5
		1760
		3500.5
		5326.5
		3583.5
		4254
		2531.5
		2626.5
		1429.5
		2963.5
		2336
		1752.5
		3587
		1082
		975
		1654.5
		1637.5
		5868.5
		2244
		306
		1571
		1306
		1518
		2315.5
		2599
		2248
		1387.5
		5180.5
		2491
		27
		4325.5
		287
		3072.5
		3509.5
		1337
		1042.5
		3013.5
		1734.5
		1909
		7121.5
		2051
		4460
		3569
		1308
		5617

## Sheet: Fig4G
Puncta Molecular Density
	wt	crsh		Density
	16427.7	2859.33		t-Test: Two-Sample Assuming Unequal Variances
	4707.84	1952.22
	6126	4835.24			wt	crsh
	6007.28	2362.03		Mean	7309.12	3163.7
	15554.8	2024.71		Variance	5.65602e+07	1.16932e+07
	5912.71	1332.94		Observations	268	782
	4692.55	1533.46		Hypothesized Mean Difference	0
	2573.39	1721.24		df	306
	4086.39	2844.21		t Stat	8.71998
	17125.2	1694.82		P(T<=t) one-tail	9.03206e-17
	15670	11849.6		t Critical one-tail	1.64985
	5415.77	1644		P(T<=t) two-tail	1.80641e-16
	11584.1	2447.68		t Critical two-tail	1.96775
	33553.5	1797.12
	1834.24	2423.66
	13296.2	3041.81
	7052.95	3798.7
	1519.81	1592.22
	2707.82	2013.72
	11028.8	1880.34
	6298.35	4999.87
	6726.94	2791.76
	2550.28	4136.94
	3105.42	1183.18
	20898	1456.77
	3812.05	1707.37
	14931.6	4462.53
	1677.62	2547.69
	5190.38	4221.93
	43519.5	2656.17
	14059	2481.96
	4559.15	799.54
	8383.06	3732.17
	2459.26	3292.84
	2646.41	3259.71
	3029.2	2163.46
	2463.86	3467.84
	11725.4	3183.62
	1519.64	1394.98
	17046.2	1250.88
	12918	3267.97
	1188.14	1825.69
	3410.7	1751.25
	2062.85	2538.68
	4601.23	2515.86
	2470.4	1430.6
	4492.48	1462.31
	2443.48	1516.85
	14842.6	4041.15
	2551.47	1627.17
	5445.53	989.292
	3843.96	7706.77
	2892.86	1381.56
	23637	1199.47
	3801.96	1179.9
	23085	3216.62
	4189.12	2567.15
	3792.79	2106.9
	1326.11	1356.38
	2810.38	4445.47
	5782.71	2394.91
	13211.7	4289.58
	2910.54	1744.73
	6555.94	1160.02
	2921.13	6180.54
	5816.29	1462.45
	1412.53	2345.92
	3420.75	8503.9
	3818.93	1746.09
	5926.4	2396.47
	17024.8	5484.34
	5879.13	2478.3
	2751.83	1881.27
	1563.22	1665.16
	11394.7	2064.69
	7824.25	2718.16
	1542.46	2561.05
	6366.41	1763.75
	1446.7	10675.2
	1303.19	1749.86
	2493.58	2205.54
	11635.5	1493.5
	1974.78	3557.64
	1234.57	2360.61
	1264.61	1113.07
	10344	1248.97
	2661.67	3978.6
	3360.97	3642
	11490.8	1657.07
	2924.42	2060.31
	1823.98	1181.06
	1797.81	6221.05
	954.348	1359.91
	17011.9	2560.4
	2395.48	3125.77
	2467.11	2520.16
	6715.73	1354.46
	1396.44	8201.01
	9600.49	1650.53
	2334.02	4113.74
	2590.46	1775.63
	9111.77	1569.95
	5284.85	7852.76
	9904.01	2620.8
	7012.42	2792.19
	1868.21	1916.23
	4197.76	2590.84
	1306.25	1408.01
	2371.17	2145.98
	10605.9	2094.97
	8867.06	4157.98
	6144.23	2273.22
	3109.45	1861.01
	7141.71	1958.57
	7869.84	3035.07
	4987.33	2317.99
	5459.81	1508.04
	22201.4	1328.22
	3321.33	2879.59
	1857.24	1670.07
	6595.29	2823.09
	751.603	2853.72
	1976.94	2211.86
	1568.79	1349.64
	24152.1	1922.47
	2778.91	2633.34
	3418.33	4746.84
	4841.89	1847.29
	11337.7	4516.42
	5823.62	2174.87
	3026.59	2716.94
	2383.85	1680.71
	829.725	1432.34
	2273.55	1760.13
	3071.37	1691.5
	1459.92	2484.31
	2754.33	5757.1
	1645.83	4969.28
	10589.3	4756.15
	1715.76	1407.15
	2830.62	11085.4
	3596.25	3311.06
	8744.32	10584.3
	4595.29	5825.66
	17422.4	2844.66
	5642.3	1176.63
	6665.53	3984.65
	1677.44	1346.12
	3515.63	2189.06
	28503.9	2094.07
	12408.6	3234.11
	3654.33	8315.84
	4524.59	2710.84
	17488.6	5142.73
	25846	3071.96
	4797.44	2662.33
	11268.9	1936.51
	2388.59	4821.23
	1419.77	2590.18
	5353.31	2140.26
	2572.95	19793
	8413.81	2267.43
	7888.33	4594.33
	4083.03	3922.17
	6318.95	2211.25
	3945.83	3274.58
	6098.53	3002.32
	2654.05	5035.17
	21034	2713.02
	3406.51	3698.05
	3960.02	6474.71
	5070.95	3857.27
	9173.59	5101.4
	32754	11424.2
	3845.9	1834.96
	3740.45	2938.63
	3018.6	2901.67
	12309.3	2445.65
	4473.24	9063
	21880.3	2336.45
	2185.45	2151.74
	1866.49	2024.01
	9210.37	1965.78
	5830.65	2132.35
	7152.38	2288.6
	3391.96	5689.53
	5762.69	2578.02
	21596.3	2778.88
	1678.19	2030.5
	3088.87	3778.14
	1258.68	3734.07
	19855.3	2977.59
	18957.4	1763.56
	2628.5	2052.92
	1196.08	1988.87
	2490.94	3248.96
	1887.58	3238.49
	9282.05	2834.77
	28738.7	1900.34
	24634.6	6102.07
	2767.91	1822.07
	3222.18	1741.9
	5910.94	3061.54
	2795.42	1581.33
	3358.45	5133.81
	1605.61	2998.4
	3124.26	3201.67
	1639.61	1287.43
	4768.75	1323.92
	729.529	10116.4
	1487.2	2057.01
	2802.49	2416.24
	1963.08	1955.49
	2937.86	1475.6
	3091.52	2327.13
	4130.75	8264.22
	1778.56	3326.22
	1666.71	6453.25
	2161.15	2432.15
	2235.98	2675.5
	7473.83	5415.03
	8408.51	1341.8
	2119.48	2086.02
	24649.3	1917.8
	23950.1	4095.2
	4074.94	2025.66
	16957.8	3392.11
	5685.86	2256.56
	7699.62	1305.38
	2212.63	2674.93
	5109.13	3111.55
	2952.88	1510.77
	5251.79	4384.66
	9351.22	2448.21
	2270.76	1320.42
	3898.93	1826.3
	6173.2	1677.44
	3556.03	2904.77
	2087.97	8883.9
	5354.42	12199
	10181.6	6951.86
	8428.85	3042.13
	2425.44	3270.35
	23036.4	4108.84
	6780.66	3032.34
	14193.8	18040.1
	4497	1068.27
	3433.23	4273.32
	16433.2	1644.15
	4197.76	1070.82
	6985.69	1507.58
	13546.4	1491.3
	12929.3	1748.7
	1598.75	955.225
	1372.62	1540.89
	6844.67	2441.11
	2274.86	664.852
	5747.01	2829.79
	4123.17	1165.29
	35119.2	869.901
	1339.82	1142.91
	17885.9	1538.69
	17389.3	1248.52
	9950.22	839.078
	38153.9	1157.21
	39253.3	2905.81
	10232.6	1265.18
	13144.7	1666.21
		1117.61
		3614.81
		934.921
		968.885
		1243.61
		1365.8
		3024.19
		1314.58
		2509.88
		2366.47
		1360.03
		1503.87
		1825.18
		1065.86
		2354.14
		1307.93
		2403.37
		3475.5
		1032.11
		1150.78
		1534.6
		4882.5
		1791.4
		1722.5
		1813.72
		639.447
		2278.14
		4215.85
		3324.14
		849.908
		894.665
		38867.3
		1562.5
		1727.33
		2475.04
		1566.85
		2710.84
		5414.6
		6921.34
		1799.59
		2667.44
		5349.48
		1595.92
		2848.76
		2164.65
		2760.06
		1143.58
		5908.8
		1694.28
		2272.73
		2231.26
		1296.08
		4498.55
		3167.66
		1489.5
		1385.64
		1895.46
		1264.04
		9887.7
		1934.57
		1771.84
		6057.27
		2014.3
		1548.26
		4791.65
		5446.9
		1551.53
		3833.05
		1649.19
		4627.21
		1540.6
		2196.06
		1531.76
		1849.82
		2368.68
		2029.73
		3704.72
		2612.96
		2119.61
		3261.13
		2884.62
		3072.61
		1159.07
		2129.67
		3965.62
		2201.9
		1107.54
		1991.29
		1833.67
		2614.69
		5323.34
		6291.45
		1475.47
		9159.27
		2104.99
		2509.81
		6253.88
		1825.58
		2073.78
		918.469
		3876.83
		4243.9
		1160.09
		2024.96
		2587.33
		16250
		1599.17
		1090.12
		3155.41
		1440.83
		2323.96
		1861.8
		3015.83
		3384.09
		3136.62
		1380.61
		5102.31
		640.661
		1988.84
		4439.75
		983.392
		3644.99
		4723.53
		1785.71
		1180.31
		4352.83
		7308.89
		2082.43
		1604.85
		2448.16
		1311.19
		9556.04
		1015.61
		5237.39
		2134.36
		1249.57
		2364.89
		2086.99
		1507.59
		11047.2
		2717.39
		2126.29
		2353.84
		2236.38
		3904.69
		2117.56
		4851.81
		3569.23
		904.241
		2730.13
		1746.32
		1054.89
		1044.94
		2062.84
		1711.18
		1019.02
		3979.66
		1810.62
		4849.92
		1375.79
		2620.53
		2010.08
		1916.92
		1458.82
		1640.44
		3658.19
		1758.46
		2521.48
		15471.9
		2340.39
		1918.21
		1504.53
		7746.48
		837.698
		1826.3
		3562.6
		2172.14
		2869.9
		2625.69
		2977.46
		2515.81
		2641.01
		2467.51
		1616.59
		3169.38
		2031.12
		2791.99
		1652.59
		1762.6
		1650.88
		4313.83
		1029.64
		3037.89
		1982.96
		2757.85
		2709.76
		1426.87
		3583
		7140.71
		1373.92
		1573.96
		1910.07
		5685.69
		1826.69
		5399.79
		3397.33
		2594.51
		2095.95
		1550.04
		1232.67
		1736.11
		2029.22
		2302.37
		2320.37
		2216.6
		1244.47
		5646.32
		2407.28
		1766.4
		1258.83
		3225.06
		2091.87
		5122.03
		1137.18
		4349.48
		1058.56
		1913.52
		1700.74
		7893.59
		1530.08
		1627.49
		5748.82
		1615.14
		1824.48
		1882.17
		1216.34
		1929.92
		2532.75
		2419.47
		2622.89
		1825.25
		2395.56
		1773.26
		1192.46
		1505.78
		3766.16
		1742.21
		2358.49
		8717.76
		2019.5
		1761.23
		1827.04
		2598.41
		1611.23
		1447.26
		986.565
		4254.39
		4953.99
		3579.55
		1365.91
		7714.71
		1740.52
		1841.19
		1892.23
		5461.88
		2442.41
		2233.87
		2476.34
		2373.74
		4765.98
		2197.27
		5264.58
		1535.88
		1670.79
		2543.33
		1124.86
		2646.84
		1177.48
		1643.94
		2046.77
		1522.56
		1569.84
		3664.94
		3059.73
		4919.64
		2285.04
		2441.18
		4825.74
		1270.23
		1019.51
		1956.83
		8308.09
		6875.54
		2163.01
		2425.56
		23982.6
		2012.4
		2391.3
		1515.74
		1931.46
		1146.29
		4081.65
		1613.17
		3500.07
		2853.02
		2805.49
		4976.93
		1924.13
		2206.39
		2249.6
		2341.23
		4298.98
		4686.09
		1968.81
		1568.24
		1972.49
		2617.9
		2794.72
		2675.54
		1834.81
		7201.62
		3754.55
		1292.21
		6327
		2203.96
		3660.58
		1257.08
		2998.15
		2068.55
		2684.96
		1588.31
		3477.4
		2257.98
		1414.5
		3119.26
		951.173
		1500.6
		1410.66
		1158.32
		3760.03
		12627.6
		2548.76
		2453.73
		14024.7
		3207.49
		1168.18
		5160.55
		3079.38
		3032.12
		1204.93
		2154.78
		2382.35
		1874.43
		2213.03
		19025.7
		1987.26
		1123.13
		1943.01
		4039.9
		1367.95
		2535.46
		1811.29
		2797.51
		2879.21
		1470.7
		4323.33
		3876.2
		5312.72
		2920.56
		3501.04
		2252.57
		1342.48
		1744.92
		2356.46
		3563.24
		5226.95
		4588.19
		2878.03
		2422.96
		3436.86
		3733.41
		6440.84
		3097.35
		5993.24
		5587.75
		1433.79
		3287.55
		3049.96
		1382.33
		1830.92
		2250
		2465.3
		8589.22
		2526.95
		3250.34
		2228.3
		3106.59
		4110.84
		4360.92
		2677.64
		5830.53
		2449.79
		1287.42
		1849.54
		3567.13
		5174.51
		1264.52
		2751.77
		2810.89
		2284.43
		3106.17
		2075.01
		4200.27
		1826.86
		2868.01
		2610.21
		2111.13
		5591.26
		3130.43
		1776.13
		1904.63
		5386.02
		2266.66
		18871.8
		1488.81
		3116.85
		3450.43
		1824.32
		2017.41
		2069.92
		3294.43
		8107.75
		1724.65
		1189.02
		3584.37
		1524.06
		4024.07
		1184.06
		1456.83
		3662.79
		1950.87
		5521.92
		3185.11
		5316.84
		9101.44
		4679.19
		8918.56
		1794.26
		14531.9
		3304.89
		6627.64
		8641.76
		1663.08
		5734.48
		709.25
		5154.88
		3072.74
		3240.06
		1611.97
		3206.74
		1954.82
		8320.42
		3147.25
		2632.02
		1858.8
		1913.27
		2546.44
		4408.66
		1403.77
		8775.6
		2157.32
		2129.16
		6045.83
		941.817
		1024.77
		3499.65
		910.194
		7378.02
		949.047
		2829.36
		2006.06
		1646.57
		1429.64
		7355.77
		2124.89
		2061.07
		1078.32
		2256.02
		7352.94
		1611.23
		1722.82
		1111.66
		2854.41
		1352.68
		1063.45
		1621.62
		2443.06
		1467.78
		57291.7
		2145.71
		5389.81
		1601.91
		1642.86
		2208.77
		1888.49
		839.97
		1783.66
		1473.28
		947.834
		11793
		1702.63
		1142.65
		2902.81
		3630.16

## Sheet: Fig4H
Puncta Molecular Density - Average per cell border
	average	9818.92	5178.78	6053.67	5202.2	6980.9	8220.89	2467.59	11779.4	9763.38		2710.8	3851.03	1790.97	4073.28	2922.18	2461.34	3477.56	4098.69			wt	crsh		t-Test: Two-Sample Assuming Unequal Variances
		wt										crsh										9818.92	2710.8
	border	1	2	3	4	5	6	7	8	9		1	2	3	4	5	6	7	8			5178.78	3851.03			wt	crsh
		16427.7	8383.06	14842.6	2661.67	6144.23	4473.24	3358.45	7473.83	16957.8		2859.33	2484.31	1068.27	38867.3	1548.26	6327	1158.32	3662.79			6053.67	1790.97		Mean	7273.97	3173.23
		4707.84	2459.26	2551.47	3360.97	3109.45	21880.3	1605.61	8408.51	5685.86		1952.22	5757.1	4273.32	1562.5	4791.65	2203.96	3760.03	1950.87			5202.2	4073.28		Variance	8.40344e+06	701843
		6126	2646.41	5445.53	11490.8	7141.71	2185.45	3124.26	2119.48	7699.62		4835.24	4969.28	1644.15	1727.33	5446.9	3660.58	12627.6	5521.92			6980.9	2922.18		Observations	9	8
		6007.28	3029.2	3843.96	2924.42	7869.84	1866.49	1639.61	24649.3	2212.63		2362.03	4756.15	1070.82	2475.04	1551.53	1257.08	2548.76	3185.11			8220.89	2461.34		Hypothesized Mean Difference	0
		15554.8	2463.86	2892.86	1823.98	4987.33	9210.37	4768.75	23950.1	5109.13		2024.71	1407.15	1507.58	1566.85	3833.05	2998.15	2453.73	5316.84			2467.59	3477.56		df	9
		5912.71	11725.4	23637	1797.81	5459.81	5830.65	729.529	4074.94	2952.88		1332.94	11085.4	1491.3	2710.84	1649.19	2068.55	14024.7	9101.44			11779.4	4098.69		t Stat	4.05746
		4692.55	1519.64	3801.96	954.348	22201.4	7152.38	1487.2		5251.79		1533.46	3311.06	1748.7	5414.6	4627.21	2684.96	3207.49	4679.19			9763.38			P(T<=t) one-tail	0.00142641
		2573.39	17046.2	23085	17011.9	3321.33	3391.96	2802.49		9351.22		1721.24	10584.3	955.225	6921.34	1540.6	1588.31	1168.18	8918.56						t Critical one-tail	1.83311
		4086.39	12918	4189.12	2395.48	1857.24	5762.69	1963.08		2270.76		2844.21	5825.66	1540.89	1799.59	2196.06	3477.4	5160.55	1794.26		average	7273.97	3173.23		P(T<=t) two-tail	0.00285281
		17125.2	1188.14	3792.79	2467.11	6595.29	21596.3	2937.86		3898.93		1694.82	2844.66	2441.11	2667.44	1531.76	2257.98	3079.38	14531.9		standard deviation	2898.87	837.761		t Critical two-tail	2.26216
		15670	3410.7	1326.11	6715.73	751.603	1678.19	3091.52		6173.2		11849.6	1176.63	664.852	5349.48	1849.82	1414.5	3032.12	3304.89		standard error	966.29	296.193
		5415.77	2062.85	2810.38	1396.44	1976.94	3088.87	4130.75		3556.03		1644	3984.65	2829.79	1595.92	2368.68	3119.26	1204.93	6627.64
		11584.1	4601.23	5782.71	9600.49	1568.79	1258.68	1778.56		2087.97		2447.68	1346.12	1165.29	2848.76	2029.73	951.173	2154.78	8641.76
		33553.5	2470.4	13211.7	2334.02	24152.1	19855.3	1666.71		5354.42		1797.12	2189.06	869.901	2164.65	3704.72	1500.6	2382.35	1663.08
		1834.24	4492.48	2910.54	2590.46	2778.91	18957.4	2161.15		10181.6		2423.66	2094.07	1142.91	2760.06	2612.96	1410.66	1874.43	5734.48
		13296.2	2443.48	6555.94	9111.77	3418.33	2628.5	2235.98		8428.85		3041.81	3234.11	1538.69	1143.58	2119.61		2213.03	709.25
		7052.95		2921.13	5284.85	4841.89	1196.08			2425.44		3798.7	8315.84	1248.52	5908.8	3261.13		19025.7	5154.88
		1519.81		5816.29	9904.01	11337.7	2490.94			23036.4		1592.22	2710.84	839.078	1694.28	2884.62		1987.26	3072.74
		2707.82		1412.53	7012.42	5823.62	1887.58			6780.66		2013.72	5142.73	1157.21	2272.73	3072.61		1123.13	3240.06
		11028.8		3420.75	1868.21	3026.59	9282.05			14193.8		1880.34	3071.96	2905.81	2231.26	1159.07		1943.01	1611.97
		6298.35		3818.93	4197.76	2383.85	28738.7			4497		4999.87	2662.33	1265.18	1296.08	2129.67		4039.9	3206.74
		6726.94		5926.4	1306.25	829.725	24634.6			3433.23		2791.76	1936.51	1666.21	4498.55	3965.62		1367.95	1954.82
		2550.28		17024.8	2371.17	2273.55	2767.91			16433.2		4136.94	4821.23	1117.61	3167.66	2201.9		2535.46	8320.42
		3105.42		5879.13	10605.9	3071.37	3222.18			4197.76		1183.18	2590.18	3614.81	1489.5	1107.54		1811.29	3147.25
		20898		2751.83	8867.06	1459.92	5910.94			6985.69		1456.77	2140.26	934.921	1385.64	1991.29		2797.51	2632.02
		3812.05		1563.22		2754.33	2795.42			13546.4		1707.37	19793	968.885	1895.46	1833.67		2879.21	1858.8
		14931.6		11394.7		1645.83				12929.3		4462.53	2267.43	1243.61	1264.04	2614.69		1470.7	1913.27
		1677.62		7824.25		10589.3				1598.75		2547.69	4594.33	1365.8	9887.7	5323.34		4323.33	2546.44
		5190.38		1542.46		1715.76				1372.62		4221.93	3922.17	3024.19	1934.57	6291.45		3876.2	4408.66
		43519.5		6366.41		2830.62				6844.67		2656.17	2211.25	1314.58	1771.84	1475.47		5312.72	1403.77
		14059		1446.7		3596.25				2274.86		2481.96	3274.58	2509.88	6057.27	9159.27		2920.56	8775.6
		4559.15		1303.19		8744.32				5747.01		799.54	3002.32	2366.47	2014.3	2104.99		3501.04	2157.32
				2493.58		4595.29				4123.17		3732.17	5035.17	1360.03		2509.81		2252.57	2129.16
				11635.5		17422.4				35119.2		3292.84	2713.02	1503.87		6253.88		1342.48	6045.83
				1974.78		5642.3				1339.82		3259.71	3698.05	1825.18		1825.58		1744.92	941.817
				1234.57		6665.53				17885.9		2163.46	6474.71	1065.86		2073.78		2356.46	1024.77
				1264.61		1677.44				17389.3		3467.84	3857.27	2354.14		918.469		3563.24	3499.65
				10344		3515.63				9950.22		3183.62	5101.4	1307.93		3876.83		5226.95	910.194
						28503.9				38153.9		1394.98	11424.2	2403.37		4243.9		4588.19	7378.02
						12408.6				39253.3		1250.88	1834.96	3475.5		1160.09		2878.03	949.047
						3654.33				10232.6		3267.97	2938.63	1032.11		2024.96		2422.96	2829.36
						4524.59				13144.7		1825.69	2901.67	1150.78		2587.33		3436.86	2006.06
						17488.6						1751.25	2445.65	1534.6		16250		3733.41	1646.57
						25846						2538.68	9063	4882.5		1599.17		6440.84	1429.64
						4797.44						2515.86	2336.45	1791.4		1090.12		3097.35	7355.77
						11268.9						1430.6	2151.74	1722.5		3155.41		5993.24	2124.89
						2388.59						1462.31	2024.01	1813.72		1440.83		5587.75	2061.07
						1419.77						1516.85	1965.78	639.447		2323.96		1433.79	1078.32
						5353.31						4041.15	2132.35	2278.14		1861.8		3287.55	2256.02
						2572.95						1627.17	2288.6	4215.85		3015.83		3049.96	7352.94
						8413.81						989.292	5689.53	3324.14		3384.09		1382.33	1611.23
						7888.33						7706.77	2578.02	849.908		3136.62		1830.92	1722.82
						4083.03						1381.56	2778.88	894.665		1380.61		2250	1111.66
						6318.95						1199.47	2030.5			5102.31		2465.3	2854.41
						3945.83						1179.9	3778.14			640.661		8589.22	1352.68
						6098.53						3216.62	3734.07			1988.84		2526.95	1063.45
						2654.05						2567.15	2977.59			4439.75		3250.34	1621.62
						21034						2106.9	1763.56			983.392		2228.3	2443.06
						3406.51						1356.38	2052.92			3644.99		3106.59	1467.78
						3960.02						4445.47	1988.87			4723.53		4110.84	57291.7
						5070.95						2394.91	3248.96			1785.71		4360.92	2145.71
						9173.59						4289.58	3238.49			1180.31		2677.64	5389.81
						32754						1744.73	2834.77			4352.83		5830.53	1601.91
						3845.9						1160.02	1900.34			7308.89		2449.79	1642.86
						3740.45						6180.54	6102.07			2082.43		1287.42	2208.77
						3018.6						1462.45	1822.07			1604.85		1849.54	1888.49
						12309.3						2345.92	1741.9			2448.16		3567.13	839.97
												8503.9	3061.54			1311.19		5174.51	1783.66
												1746.09	1581.33			9556.04		1264.52	1473.28
												2396.47	5133.81			1015.61		2751.77	947.834
												5484.34	2998.4			5237.39		2810.89	11793
												2478.3	3201.67			2134.36		2284.43	1702.63
												1881.27	1287.43			1249.57		3106.17	1142.65
												1665.16	1323.92			2364.89		2075.01	2902.81
												2064.69	10116.4			2086.99		4200.27	3630.16
												2718.16	2057.01			1507.59		1826.86
												2561.05	2416.24			11047.2		2868.01
												1763.75	1955.49			2717.39		2610.21
												10675.2	1475.6			2126.29		2111.13
												1749.86	2327.13			2353.84		5591.26
												2205.54	8264.22			2236.38		3130.43
												1493.5	3326.22			3904.69		1776.13
												3557.64	6453.25			2117.56		1904.63
												2360.61	2432.15			4851.81		5386.02
												1113.07	2675.5			3569.23		2266.66
												1248.97	5415.03			904.241		18871.8
												3978.6	1341.8			2730.13		1488.81
												3642	2086.02			1746.32		3116.85
												1657.07	1917.8			1054.89		3450.43
												2060.31	4095.2			1044.94		1824.32
												1181.06	2025.66			2062.84		2017.41
												6221.05	3392.11			1711.18		2069.92
												1359.91	2256.56			1019.02		3294.43
												2560.4	1305.38			3979.66		8107.75
												3125.77	2674.93			1810.62		1724.65
												2520.16	3111.55			4849.92		1189.02
												1354.46	1510.77			1375.79		3584.37
												8201.01	4384.66			2620.53		1524.06
												1650.53	2448.21			2010.08		4024.07
												4113.74	1320.42			1916.92		1184.06
												1775.63	1826.3			1458.82		1456.83
												1569.95	1677.44			1640.44
												7852.76	2904.77			3658.19
												2620.8	8883.9			1758.46
												2792.19	12199			2521.48
												1916.23	6951.86			15471.9
												2590.84	3042.13			2340.39
												1408.01	3270.35			1918.21
												2145.98	4108.84			1504.53
												2094.97	3032.34			7746.48
												4157.98	18040.1			837.698
												2273.22				1826.3
												1861.01				3562.6
												1958.57				2172.14
												3035.07				2869.9
												2317.99				2625.69
												1508.04				2977.46
												1328.22				2515.81
												2879.59				2641.01
												1670.07				2467.51
												2823.09				1616.59
												2853.72				3169.38
												2211.86				2031.12
												1349.64				2791.99
												1922.47				1652.59
												2633.34				1762.6
												4746.84				1650.88
												1847.29				4313.83
												4516.42				1029.64
												2174.87				3037.89
												2716.94				1982.96
												1680.71				2757.85
												1432.34				2709.76
												1760.13				1426.87
												1691.5				3583
																7140.71
																1373.92
																1573.96
																1910.07
																5685.69
																1826.69
																5399.79
																3397.33
																2594.51
																2095.95
																1550.04
																1232.67
																1736.11
																2029.22
																2302.37
																2320.37
																2216.6
																1244.47
																5646.32
																2407.28
																1766.4
																1258.83
																3225.06
																2091.87
																5122.03
																1137.18
																4349.48
																1058.56
																1913.52
																1700.74
																7893.59
																1530.08
																1627.49
																5748.82
																1615.14
																1824.48
																1882.17
																1216.34
																1929.92
																2532.75
																2419.47
																2622.89
																1825.25
																2395.56
																1773.26
																1192.46
																1505.78
																3766.16
																1742.21
																2358.49
																8717.76
																2019.5
																1761.23
																1827.04
																2598.41
																1611.23
																1447.26
																986.565
																4254.39
																4953.99
																3579.55
																1365.91
																7714.71
																1740.52
																1841.19
																1892.23
																5461.88
																2442.41
																2233.87
																2476.34
																2373.74
																4765.98
																2197.27
																5264.58
																1535.88
																1670.79
																2543.33
																1124.86
																2646.84
																1177.48
																1643.94
																2046.77
																1522.56
																1569.84
																3664.94
																3059.73
																4919.64
																2285.04
																2441.18
																4825.74
																1270.23
																1019.51
																1956.83
																8308.09
																6875.54
																2163.01
																2425.56
																23982.6
																2012.4
																2391.3
																1515.74
																1931.46
																1146.29
																4081.65
																1613.17
																3500.07
																2853.02
																2805.49
																4976.93
																1924.13
																2206.39
																2249.6
																2341.23
																4298.98
																4686.09
																1968.81
																1568.24
																1972.49
																2617.9
																2794.72
																2675.54
																1834.81
																7201.62
																3754.55
																1292.21

## Sheet: Fig4-figure supplement 2D
Non-puncta pixels
	border	wt	crsh		t-Test: Two-Sample Assuming Unequal Variances
	1	207	2301
	2	231	1526			wt	crsh
	3	345	1195		Mean	250.667	1455.12
	4	320	463		Variance	17010.2	940158
	5	503	3390		Observations	9	8
	6	149	546		Hypothesized Mean Difference	0
	7	263	1118		df	7
	8	44	1102		t Stat	-3.48555
	9	194			P(T<=t) one-tail	0.00509479
					t Critical one-tail	1.89458
	average	250.667	1455.12		P(T<=t) two-tail	0.0101896
	standard deviation	130.423	969.617		t Critical two-tail	2.36462
	standard error	43.4744	342.812
