# Supplementary material for: Celsr1 adhesive interactions mediate the asymmetric organization of planar polarity complexes
Source: eLife. 2021 Feb 2;10:e62097. doi: 10.7554/eLife.62097 (PMC7857726; doi:10.7554/eLife.62097)
Supplement: Figure 5—source data 1. [file elife-62097-fig5-data1.xlsx]

## Sheet: Fig5B
Normalized FRAP recovery curves
																																								Recovery curves combined
	Wt
		Border	1	2	3	4	5	6	7	8	9	10	11	12	13	14	15	16	17	18	19	20	21	22	23	average	standard deviation	standard error													average			standard error
	Time (min)	-0.5	0.931068	0.977557	0.992473	0.981471	0.999995	0.93744	0.967288	0.921185	0.992701	0.948783	1	0.910823	0.895757	1	0.996362	1	0.844694	1	0.95336	0.947445	0.997288	1	1	0.96503	0.0422642	0.00881269												Time (min)	WT	Crsh	dN	WT	Crsh	dN
			0.95827	1.00001	1	1	0.985442	0.966176	0.989648	0.96939	1	0.937008	0.962619	0.982515	0.979418	0.955214	1	0.971868	0.964352	0.985728	1	1	0.973172	0.997936	0.926189	0.978476	0.0213464	0.00445102												-0.5	0.96503	0.972427	0.97094	0.00881269	0.0100582	0.0109741
			1	0.97214	0.988498	0.952591	0.992254	0.99998	1.00001	1	0.998417	1	0.992014	1	1	0.941185	0.974835	0.958879	1	0.989036	0.98544	0.944133	1	0.966202	0.881992	0.979896	0.0288345	0.00601241													0.978476	0.980607	0.961038	0.00445102	0.00859224	0.0160931
		0	0	0	0	0	0	0	0	0	0	0	0	0	0	0.0142509	0	0	0	0	0.026785	0	0.00112994	0	0.0423744	0.00367566	0.0104591	0.00218088													0.979896	0.977252	0.9613	0.00601241	0.00532549	0.015807
			0.0192079	0.0209718	0.00156683	0.00547642	0.00898291	0.0224704	0.0226225	0.0163833	0.0125647	0.0103129	0.00249282	0.0157118	0.027827	0	0.0160564	0.0274569	0.0431098	0.01146	0	0.0119715	0.000484262	0.00199881	0.032859	0.0144343	0.0115511	0.00240856												0	0.00367566	0	5.90577e-07	0.00218088	0	7.92342e-07
			0.0260382	0.025855	0.00426939	-0.00228389	0.00996154	0.0355471	0.0315651	0.0188661	0.0239115	0.0178496	0.00607047	0.0212741	0.0508073	0.00855458	0.00542823	0.042641	0.0679808	0.00146499	0.0215682	0.0216478	0.00397094	0.0108247	0.0161405	0.0204327	0.0169431	0.00353287													0.0144343	0.0550589	0.14507	0.00240856	0.0080642	0.0204464
		0.5	0.044866	0.0349907	0.0101222	0.0125368	0.0194703	0.0462873	0.0313435	0.0276892	0.0305057	0.0233584	0.0303754	0.0280335	0.0772444	0.0198265	0.00803178	0.051361	0.119289	0.0108457	0.0328584	0.037323	0.0182082	0.0222724	0.0390396	0.0337339	0.0243209	0.00507125													0.0204327	0.106951	0.243499	0.00353287	0.0144111	0.0347365
			0.0583959	0.0442962	0.0152247	0.000945481	0.0243245	0.0616292	0.042077	0.0373972	0.0558641	0.0343183	0.0351187	0.0401537	0.099058	0.0164248	0.0141805	0.0461398	0.150516	0.0119562	0.0539594	0.0450692	0.00797417	0.02688	0	0.0400827	0.0332311	0.00692917												0.5	0.0337339	0.137824	0.313144	0.00507125	0.0178016	0.0359083
			0.0650361	0.0415393	0.0239542	0.00627456	0.0298554	0.0737199	0.0491016	0.0510056	0.0705123	0.0332947	0.0368729	0.0574206	0.102292	0.0461746	0.0142803	0.0595002	0.100037	0.0219749	0.0438371	0.0891213	0.0156255	0.0202736	0.0345487	0.0472283	0.0268713	0.00560306													0.0400827	0.168757	0.380135	0.00692917	0.0210012	0.0416862
		1	0.0709755	0.0563182	0.0291935	0.0126965	0.0287989	0.0847135	0.0534931	0.0411344	0.0652166	0.0338934	0.0478944	0.0683765	0.108435	0.0598015	0.0185316	0.0511044	0.131264	0.041516	0.0407226	0.0684646	0.027732	0.0291125	0.0365051	0.0524301	0.0281765	0.00587521													0.0472283	0.198514	0.4298	0.00560306	0.0227156	0.0454077
			0.0644422	0.0603282	0.0316557	0.0330059	0.0375432	0.101212	0.0664017	0.0479214	0.0812184	0.0438297	0.0403121	0.0784396	0.127043	0.0542058	0.0114984	0.0673961	0.105011	0.0226838	0.0226583	0.0680212	0.01682	0.0376139	0.043486	0.0549021	0.0295683	0.00616541												1	0.0524301	0.217102	0.46516	0.00587521	0.0263294	0.0469921
			0.0875701	0.0579352	0.0344329	0.0196709	0.0452164	0.112732	0.074502	0.0487289	0.0875749	0.0564986	0.0477674	0.0767076	0.134403	0.0496971	0.000592041	0.0685984	0.164702	0.0363649	0.0548937	0.0714118	0.0213398	0.0358098	0.0470876	0.0623581	0.0373093	0.00777953													0.0549021	0.242749	0.486209	0.00616541	0.0291076	0.0434638
		1.5	0.0661527	0.0657127	0.0432825	0.0209357	0.0425337	0.125599	0.0747237	0.0586603	0.0866075	0.054606	0.0496486	0.0917693	0.136456	0.0696041	0.00793192	0.0621209	0.119473	0.0238652	0.0521685	0.0823922	0.0147538	0.0327726	0.036016	0.0616429	0.0343226	0.00715676													0.0623581	0.26743	0.514009	0.00777953	0.0301785	0.0453382
			0.0898152	0.067459	0.0392536	0.0254175	0.0500073	0.128767	0.0733643	0.0731192	0.0912412	0.0587968	0.0532724	0.0977101	0.167509	0.0432358	0.00945126	0.0729146	0.179256	0.0283547	0.042202	0.0799145	0.0100726	0.0399761	0.0699867	0.0691781	0.0435624	0.0090834												1.5	0.0616429	0.290011	0.557036	0.00715676	0.0337542	0.0496504
			0.0915495	0.0699167	0.0439333	0.038028	0.0509713	0.129718	0.0796737	0.0700865	0.0890686	0.0600473	0.0454593	0.102034	0.164312	0.0677925	0.00865949	0.0680108	0.17115	0.0369084	0.0529471	0.0915469	0.0142373	0.0455832	0.0670076	0.0721148	0.0408091	0.00850928													0.0691781	0.307012	0.568628	0.0090834	0.0365213	0.0474109
		2	0.0880452	0.0667556	0.0512742	0.0211198	0.0633624	0.147856	0.077546	0.066358	0.0879144	0.0865585	0.0491292	0.111994	0.179738	0.0644713	0.0142589	0.0719554	0.200811	0.0461709	0.0448493	0.074672	0.000839387	0.0510085	0.073855	0.0756757	0.0476642	0.00993867													0.0721148	0.321017	0.587893	0.00850928	0.0360742	0.0507963
			0.0935213	0.0816396	0.0400245	0.0243369	0.0667803	0.157867	0.0778119	0.0908255	0.105257	0.0661307	0.0619857	0.109666	0.203993	0.094825	0.0138951	0.100986	0.130711	0.0360105	0.0557502	0.102162	0.0214366	0.0461413	0.0713651	0.0805705	0.0446756	0.00931551												2	0.0756757	0.343824	0.608004	0.00993867	0.0368024	0.0536761
			0.10584	0.078721	0.040294	0.0315324	0.0684746	0.17347	0.0854365	0.0990558	0.100988	0.070674	0.0839825	0.116643	0.209797	0.111632	0.0250155	0.0841135	0.214167	0.046738	0.0210231	0.0930075	0.0189185	0.054448	0.100267	0.0884452	0.0533173	0.0111174													0.0805705	0.366023	0.629515	0.00931551	0.0401471	0.0567616
		2.5	0.10616	0.0879699	0.051411	0.0348232	0.0768441	0.175189	0.0986524	0.106702	0.108232	0.0697277	0.06801	0.119716	0.211583	0.0961736	0.013139	0.0714691	0.248987	0.0504714	0.102235	0.0881041	0.036707	0.0642863	0.0775011	0.094091	0.0547846	0.0114234													0.0884452	0.377444	0.639085	0.0111174	0.0419168	0.0542612
			0.12405	0.0869432	0.0468266	0.0359037	0.0782463	0.17334	0.100686	0.114735	0.112827	0.0906479	0.0736073	0.123329	0.204907	0.129144	0.0190452	0.0733536	0.238025	0.0309539	0.191855	0.09572	0.0147215	0.065065	0.0608715	0.0993393	0.0590275	0.0123081												2.5	0.094091	0.386348	0.653215	0.0114234	0.0408841	0.0549123
			0.114737	0.0908804	0.0466234	0.0427922	0.0819465	0.178492	0.101147	0.100877	0.110188	0.0824498	0.0613856	0.124987	0.219426	0.110505	0.0250726	0.0762378	0.236367	0.0446114	0.100288	0.0767586	0	0.080718	0.0866607	0.0953543	0.055697	0.0116136													0.0993393	0.397539	0.668715	0.0123081	0.0407328	0.0562846
		3	0.123408	0.0960304	0.046383	0.0560535	0.0802279	0.186072	0.102958	0.109279	0.12215	0.0966541	0.073365	0.126645	0.205771	0.128963	0.0191379	0.0804593	0.255066	0.0436663	0.0747489	0.100832	0.0169169	0.0709836	0.0815918	0.0998854	0.0564369	0.0117679													0.0953543	0.41939	0.668834	0.0116136	0.0440029	0.0517452
			0.127863	0.0986175	0.0522027	0.0454199	0.0890355	0.192163	0.106011	0.128257	0.166014	0.0846128	0.0575079	0.123695	0.21841	0.156076	0.027669	0.0960959	0.216286	0.0329387	0.0724909	0.0907905	0.0164972	0.0792643	0.0860382	0.102781	0.0568673	0.0118577												3	0.0998854	0.424132	0.679808	0.0117679	0.0445196	0.0579936
			0.140098	0.107842	0.0466939	0.0602898	0.0878962	0.195141	0.111818	0.13964	0.151408	0.089832	0.0545303	0.129533	0.205527	0.217367	0.0305721	0.0966903	0.176769	0.036743	0.0601106	0.117889	0.00865214	0.0826519	0.103424	0.10657	0.0571661	0.01192													0.102781	0.435696	0.684879	0.0118577	0.0469098	0.0526896
		3.5	0.146132	0.115604	0.0458027	0.0766085	0.0975997	0.201208	0.118725	0.144013	0.169192	0.0990971	0.0698796	0.133174	0.213427	0.214146	0.0190594	0.0867004	0.269436	0.0274096	0.0508448	0.0964764	0.0208555	0.0875062	0.102357	0.113272	0.0662615	0.0138165													0.10657	0.448426	0.6918	0.01192	0.0478798	0.0473975
			0.132816	0.116121	0.0458939	0.0653242	0.0956327	0.213599	0.123089	0.155534	0.186161	0.111925	0.0801163	0.126562	0.207788	0.233168	0.0228542	0.0884093	0.262988	0.0198247	0.0520906	0.0918599	0.00887813	0.0814449	0.091952	0.113654	0.0693776	0.0144662												3.5	0.113272	0.461243	0.695128	0.0138165	0.0482233	0.052123
			0.14498	0.121643	0.0432411	0.0650663	0.110687	0.222011	0.136477	0.177381	0.19088	0.0999372	0.0846634	0.133717	0.22451	0.229283	0.0293025	0.0908747	0.207535	0.0373337	0.0550494	0.105788	0.0111703	0.104146	0.093775	0.118237	0.0653746	0.0136315													0.113654	0.476143	0.696676	0.0144662	0.0449204	0.0480938
		4	0.14555	0.124101	0.0439416	0.0632859	0.111159	0.234882	0.140986	0.159512	0.200283	0.10352	0.0898568	0.136584	0.219987	0.271351	0.0186172	0.084897	0.215733	0.0407835	0.07981	0.118333	0.0228249	0.104496	0.0707426	0.121793	0.0695304	0.0144981													0.118237	0.467484	0.693913	0.0136315	0.0494262	0.0500244
			0.143163	0.124068	0.0507685	0.0618001	0.11318	0.243765	0.143741	0.197261	0.199477	0.111071	0.078743	0.135819	0.218936	0.248606	0.0245519	0.0999527	0.259948	0.0449895	0.0943705	0.107587	0.0116223	0.10961	0.099333	0.127059	0.0713433	0.0148761												4	0.121793	0.471962	0.694782	0.0144981	0.0455715	0.0513811
			0.137259	0.135718	0.0652637	0.0606459	0.118594	0.256532	0.148641	0.15897	0.200504	0.110728	0.0789392	0.139197	0.256744	0.251907	0.0240383	0.106072	0.353445	0.0607736	0.0797321	0.104327	0.0195964	0.0970459	0.108893	0.133633	0.0821573	0.017131													0.127059	0.496243	0.715947	0.0148761	0.0489926	0.0536238
		4.5	0.160624	0.133333	0.0584658	0.0588777	0.119426	0.264944	0.153673	0.196454	0.182538	0.107667	0.0908493	0.132828	0.25305	0.245647	0.0280756	0.091388	0.240789	0.0395785	0.0939812	0.114447	0.0119774	0.102705	0.109426	0.130032	0.0728337	0.0151869													0.133633	0.502042	0.727246	0.017131	0.0520244	0.0554355
			0.170709	0.147239	0.0613881	0.0645629	0.112615	0.268892	0.155778	0.200474	0.215666	0.117178	0.088091	0.141538	0.24291	0.293412	0.0205502	0.116326	0.203482	0.036294	0.124192	0.0960851	0.0195642	0.0917763	0.1	0.134292	0.0758818	0.0158225												4.5	0.130032	0.491943	0.727861	0.0151869	0.0490284	0.058681
			0.167158	0.153796	0.0553695	0.0631017	0.111705	0.276397	0.161062	0.191428	0.216748	0.127149	0.087387	0.14241	0.243263	0.292104	0.0275763	0.104992	0.244105	0.0525744	0.0817566	0.0993975	0.0227603	0.106625	0.112406	0.136577	0.0774193	0.016143													0.134292	0.517926	0.739534	0.0158225	0.0478438	0.0569441
		5	0.160601	0.160021	0.0590379	0.0638016	0.121447	0.28225	0.158133	0.201694	0.250869	0.102791	0.0843864	0.157048	0.242752	0.261569	0.0253151	0.106457	0.257001	0.0414215	0.0637701	0.119689	0.0125262	0.107806	0.144553	0.138476	0.080187	0.0167201													0.136577	0.519107	0.753907	0.016143	0.0482561	0.057596
																																								5	0.138476	0.522164	0.747719	0.0167201	0.0482853	0.0578543
	Crsh	Border	1	2	3	4	5	6	7	8	9	10	11	12	13	14	15	16	17	18	19	20	21	22	23	24	25	26	27	28	29	30	31	32	33	average	standard deviation	standard error
	Time (min)	-0.5	0.975281	1	0.978902	0.935139	0.999974	0.996738	1	0.961821	0.997583	0.95661	1	0.936984	0.977242	0.958629	0.985655	1	1	0.815562	1	1	0.980512	0.977969	0.952597	0.968638	0.997079	1	1	1	0.9755	0.934664	0.961132	1	0.953932	0.975095	0.0358738	0.00624483
			0.966972	0.996689	0.986496	0.982303	0.999381	0.998986	0.994571	1	0.959814	1	0.994557	1	1	0.994794	1	0.986133	0.849062	1	0.921767	0.913807	0.985569	0.992548	0.875762	0.999982	1	0.973856	0.892199	0.880289	0.984887	0.970932	1	0.899993	0.966213	0.968714	0.0440431	0.00766693
			1	0.993121	1	1	0.985245	1.00004	0.958555	0.96305	1	0.948748	0.967041	0.958774	0.949205	1	0.983343	0.995213	0.929981	0.989014	0.946453	0.945443	1.00002	1	1	0.972699	0.941327	0.893221	0.848539	0.885286	1	1	0.969012	0.93778	0.948652	0.966962	0.0377684	0.00657464
		0	0	0	0	0	0	0	0	0	0	0	0	0	0	0	0	0	0	0	0	0	0	0	0	0	0.0282153	0	0	0	0	0	0	0	0	0.000855009	0.00491165	0.000855009
			0.0415657	0.0514967	0.0469806	0.036436	0.0540914	0.0295056	0.0448602	0.131011	0.0904211	0.0491448	0.0566313	0.0713576	0.0524042	0.0306766	0.0974424	0.0146366	0.0189966	0.000775494	0.127685	0.1063	0.00598127	0.0652459	0.141588	0.0266318	0	0.110999	0.211574	0.0806932	0.0113358	0.144662	0.0238959	0.0575982	0.116644	0.0651293	0.0494827	0.00861383
			0.0513202	0.0725318	0.0561876	0.0727524	0.0953511	0.0413507	0.0930849	0.247369	0.138966	0.1682	0.120275	0.148378	0.0960212	0.0548008	0.205266	0.0284729	0.101498	0.0396795	0.200567	0.291724	0.025232	0.126935	0.141692	0.0598735	0.0323355	0.190808	0.182667	0.252605	0.0290613	0.229625	0.0529835	0.0697635	0.122867	0.116371	0.074572	0.0129813
		0.5	0.0740425	0.116816	0.0628772	0.0906032	0.121562	0.0591081	0.0812836	0.23994	0.189433	0.245913	0.176567	0.241069	0.123407	0.0472943	0.259154	0.0244405	0.163328	0.0719917	0.229834	0.311694	0.00958169	0.178407	0.179283	0.0925009	0.0437572	0.290432	0.363035	0.265788	0.0149044	0.210065	0.0864169	0.077817	0.232287	0.150746	0.0951467	0.0165629
			0.0931459	0.136766	0.0872298	0.101382	0.132353	0.0733588	0.105498	0.295888	0.236227	0.322159	0.216069	0.287647	0.160254	0.0870601	0.312665	0.0460338	0.156539	0.0913791	0.264734	0.440228	0.0319917	0.20549	0.290612	0.132701	0.0236779	0.385744	0.41617	0.429194	0.0358614	0.306235	0.118888	0.0545059	0.382328	0.195758	0.128885	0.0224361
			0.107341	0.173161	0.0703875	0.133291	0.149182	0.101305	0.130171	0.337301	0.290156	0.376331	0.265287	0.31543	0.191658	0.0986119	0.264911	0.050728	0.218309	0.174615	0.323591	0.559292	0.0374527	0.226477	0.301973	0.137037	0.0405236	0.418677	0.392142	0.590899	0.0424269	0.323689	0.128959	0.117371	0.363768	0.225832	0.144359	0.0251297
		1	0.115047	0.191369	0.0830297	0.163185	0.164472	0.0941081	0.143986	0.370046	0.309168	0.41561	0.351772	0.327497	0.19493	0.0998617	0.333805	0.0374611	0.216604	0.164146	0.348845	0.483667	0.0415401	0.282902	0.339977	0.170829	0.0470429	0.490964	0.372511	0.474591	0.0485858	0.284366	0.163528	0.135109	0.474854	0.240467	0.142066	0.0247305
			0.118166	0.237373	0.0786904	0.187663	0.193799	0.136315	0.139194	0.426209	0.348117	0.519494	0.352997	0.359988	0.24047	0.131145	0.353577	0.0525749	0.254962	0.164922	0.316579	0.474197	0.0597378	0.317875	0.211711	0.187734	0.0782309	0.524264	0.32156	0.51616	0.0617279	0.368446	0.180737	0.0975601	0.485857	0.257516	0.147811	0.0257306
			0.146161	0.279282	0.100748	0.20905	0.213445	0.13474	0.153315	0.406241	0.389082	0.583257	0.384393	0.414501	0.269039	0.143096	0.308135	0.092791	0.265222	0.211581	0.377098	0.546253	0.0722997	0.310578	0.290509	0.221947	0.0473036	0.572149	0.325702	0.558261	0.0750385	0.354727	0.226698	0.131168	0.526702	0.283046	0.156632	0.0272662
		1.5	0.166044	0.297813	0.0949487	0.217232	0.215016	0.142523	0.187801	0.453314	0.404662	0.616185	0.444745	0.455682	0.27998	0.15146	0.378539	0.0630714	0.270336	0.256947	0.413904	0.513588	0.077232	0.357759	0.353403	0.216841	0.0713988	0.632419	0.476227	0.521582	0.0781967	0.32919	0.198966	0.166134	0.635788	0.30724	0.170662	0.0297084
			0.161084	0.331284	0.110957	0.232743	0.241064	0.157752	0.209263	0.457886	0.417434	0.660404	0.453223	0.564948	0.314254	0.171583	0.36443	0.0508203	0.301693	0.219077	0.413336	0.630181	0.0772986	0.316717	0.469999	0.287981	0.0708251	0.653793	0.48939	0.653306	0.0786217	0.306167	0.268359	0.174222	0.594443	0.330441	0.18586	0.032354
			0.180853	0.362691	0.118814	0.249637	0.245596	0.181295	0.213723	0.467029	0.439851	0.678887	0.490263	0.523029	0.2963	0.198533	0.423981	0.0633792	0.3283	0.230968	0.406202	0.595457	0.0832508	0.340061	0.343385	0.277842	0.140503	0.580039	0.494638	0.621837	0.0852055	0.433849	0.262403	0.107347	0.634398	0.33635	0.177468	0.0308931
		2	0.193582	0.386983	0.143334	0.269896	0.255969	0.193721	0.303418	0.494458	0.443627	0.702879	0.49204	0.565066	0.319644	0.211978	0.412892	0.0652569	0.374026	0.234975	0.46891	0.640544	0.0913091	0.356743	0.292471	0.279446	0.148117	0.705899	0.439489	0.711992	0.0908002	0.428212	0.254291	0.166134	0.67152	0.357867	0.18938	0.0329668
			0.239588	0.395152	0.160037	0.29487	0.295612	0.215668	0.265695	0.568336	0.466837	0.761861	0.542945	0.608219	0.36693	0.186175	0.400104	0.0844338	0.336033	0.246478	0.519457	0.591134	0.0972737	0.357575	0.322214	0.316263	0.119433	0.648931	0.47373	0.648735	0.0952847	0.346849	0.289775	0.17813	0.785774	0.370471	0.193753	0.0337281
			0.226703	0.445671	0.128592	0.303668	0.269831	0.236738	0.34002	0.513844	0.480405	0.812299	0.572585	0.614707	0.377309	0.22208	0.497924	0.0975621	0.385777	0.185602	0.460113	0.692973	0.0840416	0.365705	0.385521	0.317758	0.103526	0.670305	0.476652	0.763661	0.0853301	0.375781	0.3025	0.179489	0.734704	0.385133	0.206605	0.0359652
		2.5	0.247065	0.428237	0.149704	0.281393	0.288479	0.255433	0.399689	0.499267	0.517152	0.776029	0.585068	0.643069	0.378244	0.219802	0.442667	0.0971466	0.360387	0.221274	0.550507	0.667101	0.096154	0.394976	0.355159	0.334883	0.126056	0.627649	0.456879	0.751329	0.0962739	0.348207	0.323	0.259685	0.759378	0.392041	0.197349	0.034354
			0.26464	0.453872	0.155309	0.301344	0.293115	0.251682	0.385033	0.531871	0.487808	0.805891	0.596368	0.659197	0.409961	0.253452	0.45772	0.102549	0.421	0.237431	0.485002	0.687483	0.0946348	0.38799	0.390581	0.369307	0.101492	0.677277	0.444596	0.774718	0.0955814	0.496876	0.35816	0.179285	0.748319	0.404835	0.203569	0.0354368
			0.24356	0.474811	0.170941	0.28293	0.314912	0.269159	0.459231	0.531613	0.550534	0.834721	0.597032	0.709605	0.416973	0.24383	0.49127	0.0952227	0.459784	0.250097	0.572193	0.751167	0.0896816	0.385717	0.304038	0.400843	0.10968	0.662049	0.416028	0.832341	0.0897706	0.349294	0.383122	0.201611	0.81117	0.416816	0.219138	0.0381471
		3	0.282942	0.480873	0.20094	0.279514	0.329093	0.303104	0.465628	0.501844	0.540531	0.886293	0.628069	0.725914	0.446963	0.247491	0.464373	0.097085	0.443619	0.216234	0.517998	0.7535	0.109207	0.399492	0.44542	0.442767	0.119485	0.654344	0.452624	0.897619	0.118953	0.47066	0.427994	0.169634	0.799778	0.433939	0.220492	0.0383828
			0.280072	0.505616	0.18311	0.305222	0.337987	0.312421	0.529452	0.508248	0.589108	0.86499	0.721366	0.768875	0.466378	0.282694	0.416572	0.103918	0.398411	0.188833	0.514957	0.70608	0.121299	0.433759	0.350924	0.39086	0.100501	0.724154	0.424	0.796832	0.129582	0.389432	0.385915	0.26118	0.724979	0.43084	0.214443	0.0373297
			0.260376	0.533649	0.177436	0.310312	0.332353	0.326509	0.514388	0.541327	0.610912	0.877777	0.767638	0.773717	0.481638	0.292508	0.504388	0.118032	0.382398	0.233941	0.480786	0.727079	0.124753	0.45236	0.328101	0.423387	0.0986753	0.776167	0.439773	0.798745	0.130637	0.483768	0.425143	0.200048	0.832342	0.447305	0.226793	0.0394796
		3.5	0.286083	0.539216	0.192456	0.314908	0.346267	0.326121	0.486504	0.540993	0.621532	0.896653	0.81781	0.815174	0.471638	0.271342	0.4698	0.145627	0.436739	0.312395	0.472355	0.785479	0.121473	0.468196	0.339564	0.444435	0.122092	0.793413	0.461078	0.889645	0.129102	0.424477	0.448123	0.21432	0.871687	0.46293	0.235922	0.0410688
			0.290981	0.538357	0.239381	0.351207	0.342499	0.32739	0.533785	0.53544	0.649377	0.805426	0.841178	0.818148	0.478626	0.29943	0.478152	0.152276	0.467213	0.389298	0.508553	0.661954	0.163588	0.448437	0.278529	0.461111	0.153802	0.859829	0.521106	0.788539	0.16523	0.425224	0.460859	0.189717	0.852237	0.468996	0.218974	0.0381185
			0.324081	0.559693	0.195919	0.357066	0.359757	0.342875	0.479673	0.549187	0.605958	0.898368	0.865624	0.771156	0.462224	0.302211	0.456116	0.133038	0.447668	0.188445	0.583137	0.787881	0.133415	0.440251	0.46184	0.492501	0.18087	0.786992	0.496227	0.884435	0.136019	0.490967	0.478914	0.222679	0.752042	0.473552	0.227781	0.0396515
		4	0.310396	0.588875	0.194598	0.390752	0.369883	0.359771	0.500446	0.576864	0.596346	0.890187	0.77806	0.782211	0.483633	0.291494	0.450642	0.16268	0.427697	0.279049	0.533685	0.756794	0.146485	0.493204	0.386864	0.478209	0.152081	0.71709	0.50783	0.830959	0.148923	0.485398	0.468021	0.253976	0.745985	0.470881	0.211005	0.0367313
			0.33888	0.607975	0.197574	0.417605	0.365358	0.358175	0.503454	0.550438	0.609655	0.934871	0.793862	0.863925	0.503089	0.309318	0.512788	0.162573	0.494216	0.265865	0.638995	0.709649	0.134793	0.497255	0.342559	0.530381	0.139199	0.869462	0.539631	0.80236	0.139771	0.465634	0.516497	0.218635	0.858572	0.490697	0.231839	0.040358
			0.324279	0.629236	0.203527	0.461198	0.383334	0.372069	0.484337	0.594094	0.621048	1.0171	0.803855	0.855992	0.486514	0.316639	0.517601	0.152384	0.507245	0.210288	0.598054	0.710815	0.142352	0.44529	0.34669	0.50342	0.183843	0.733511	0.448142	0.826281	0.1456	0.504822	0.483133	0.243747	0.888914	0.489253	0.232327	0.0404429
		4.5	0.33395	0.617606	0.220981	0.419501	0.404734	0.369465	0.48658	0.54551	0.657503	1.0412	0.707217	0.836134	0.49816	0.330765	0.477492	0.185659	0.380876	0.276076	0.557519	0.72756	0.136017	0.491102	0.329753	0.520636	0.130854	0.843592	0.497986	0.848607	0.141057	0.458164	0.506808	0.24266	0.921089	0.489176	0.236065	0.0410936
			0.363193	0.659859	0.191413	0.474813	0.412721	0.38024	0.53692	0.574395	0.662261	1.02303	0.720523	0.84127	0.501266	0.327451	0.539874	0.178733	0.526516	0.370945	0.555168	0.738265	0.148978	0.436582	0.379841	0.546975	0.132158	0.699752	0.421645	0.849139	0.153081	0.502241	0.530658	0.298899	0.96788	0.504445	0.228641	0.0398013
			0.36024	0.670533	0.218798	0.530722	0.414605	0.371121	0.59111	0.543947	0.722536	1.02741	0.683967	0.852399	0.539126	0.336045	0.531899	0.234832	0.395884	0.294171	0.543697	0.787675	0.153611	0.454167	0.342353	0.58601	0.165797	0.696083	0.433844	0.926855	0.15613	0.4674	0.582981	0.25316	1	0.511185	0.237838	0.0414023
		5	0.347542	0.679594	0.239214	0.554483	0.434459	0.375984	0.612953	0.549241	0.682659	1.01293	0.658124	0.838282	0.517947	0.361382	0.508022	0.204035	0.425749	0.243117	0.675395	0.697777	0.152537	0.431727	0.338222	0.575504	0.130646	0.735162	0.42417	0.819583	0.160207	0.537218	0.573409	0.316161	0.864296	0.505386	0.22294	0.0388088
	dN	Border	1	2	3	4	5	6	7	8	9	10	11	12	13	14	15	16	17	18	average	standard deviation	standard error
	Time (min)	-0.5	0.985663	1	1	1	1	0.976819	0.971219	0.997438	0.976123	0.922295	0.938389	0.949545	1.00001	0.954892	1	0.901747	1.00002	0.902748	0.97094	0.0347031	0.0109741
			0.999993	0.986461	0.90768	0.943143	0.96559	1	1	0.988503	1	0.925535	0.960096	0.966834	0.935134	0.99207	0.791824	1	0.958094	0.977734	0.961038	0.050891	0.0160931
			0.990786	0.971981	0.86255	0.944889	0.896182	0.986405	0.951707	1	0.983506	0.999993	1	0.999983	0.949997	1	0.834175	0.946831	0.984429	0.999984	0.9613	0.0499862	0.015807
		0	0	0	0	0	0	0	0	0	0	0	0	0	0	1.06304e-05	0	0	0	0	5.90577e-07	2.5056e-06	7.92342e-07
			0.113238	0.0670951	0.110163	0.141158	0.0901335	0.12932	0.242616	0.0782104	0.166862	0.198191	0.0597655	0.256962	0.126748	0.162531	0.148189	0.142504	0.09414	0.283441	0.14507	0.0646572	0.0204464
			0.202644	0.114506	0.142804	0.198939	0.162774	0.242983	0.345178	0.128347	0.253908	0.346109	0.0962885	0.54474	0.260108	0.2756	0.231673	0.265218	0.195959	0.375198	0.243499	0.109846	0.0347365
		0.5	0.2998	0.174883	0.173232	0.318191	0.1975	0.315032	0.418483	0.184051	0.349539	0.50982	0.130477	0.532164	0.321532	0.320389	0.326144	0.371092	0.270115	0.424141	0.313144	0.113552	0.0359083
			0.383125	0.232839	0.201259	0.387125	0.261405	0.400567	0.453717	0.221825	0.540941	0.569632	0.168777	0.648133	0.347396	0.413543	0.430105	0.37635	0.323219	0.482474	0.380135	0.131823	0.0416862
			0.479953	0.28784	0.221103	0.438665	0.301839	0.496453	0.511128	0.260577	0.569766	0.598522	0.200579	0.765285	0.426395	0.44806	0.401786	0.464975	0.352297	0.511186	0.4298	0.143592	0.0454077
		1	0.548791	0.301588	0.276005	0.460418	0.341199	0.539528	0.517385	0.291554	0.612896	0.601806	0.213732	0.819874	0.46983	0.482818	0.414702	0.548451	0.386366	0.545947	0.46516	0.148602	0.0469921
			0.578393	0.330454	0.322661	0.52725	0.331717	0.588196	0.540251	0.332238	0.64986	0.595465	0.237785	0.770329	0.494545	0.452454	0.460098	0.521586	0.426469	0.592006	0.486209	0.137445	0.0434638
			0.623498	0.383366	0.343265	0.494744	0.353844	0.647181	0.59212	0.371262	0.632395	0.605147	0.261793	0.856012	0.503345	0.47577	0.467913	0.598506	0.461163	0.580831	0.514009	0.143372	0.0453382
		1.5	0.649458	0.405939	0.38111	0.562216	0.361133	0.690163	0.60625	0.420018	0.734085	0.562314	0.276374	0.940265	0.577842	0.500393	0.59017	0.653382	0.49297	0.622572	0.557036	0.157008	0.0496504
			0.700077	0.4241	0.399211	0.552852	0.390356	0.750716	0.612398	0.441753	0.719919	0.573396	0.311372	0.905761	0.548021	0.486602	0.59357	0.68586	0.507276	0.632062	0.568628	0.149927	0.0474109
			0.694035	0.42676	0.449008	0.616381	0.377055	0.742901	0.629293	0.467504	0.855366	0.587058	0.310627	0.936736	0.552322	0.472297	0.585932	0.670536	0.556552	0.651707	0.587893	0.160632	0.0507963
		2	0.700941	0.437774	0.469572	0.579822	0.377914	0.795772	0.652506	0.483272	0.908746	0.581512	0.326939	0.962655	0.564543	0.496467	0.666117	0.70606	0.577446	0.656008	0.608004	0.169739	0.0536761
			0.754293	0.452453	0.458939	0.636978	0.396741	0.793005	0.643446	0.515379	0.868175	0.598242	0.343016	1.08902	0.581224	0.519829	0.650486	0.728254	0.629854	0.671938	0.629515	0.179496	0.0567616
			0.746755	0.487745	0.4416	0.687731	0.403815	0.850451	0.687224	0.543171	0.835959	0.623154	0.358514	1.04267	0.617498	0.493703	0.614479	0.727475	0.655437	0.686151	0.639085	0.171589	0.0542612
		2.5	0.781901	0.497432	0.461999	0.655261	0.458815	0.85463	0.693567	0.554302	0.817801	0.686937	0.355838	1.09292	0.575197	0.51281	0.661194	0.745162	0.682357	0.669751	0.653215	0.173648	0.0549123
			0.817959	0.510541	0.503721	0.701868	0.43453	0.881121	0.652065	0.619857	0.830918	0.670238	0.383062	1.11818	0.645747	0.476298	0.637595	0.770128	0.675089	0.707941	0.668715	0.177988	0.0562846
			0.858637	0.500967	0.524395	0.693726	0.482128	0.855608	0.684147	0.609217	0.736258	0.698911	0.387727	1.07045	0.596164	0.50484	0.664797	0.792977	0.718845	0.65921	0.668834	0.163633	0.0517452
		3	0.866206	0.49957	0.536209	0.727172	0.480625	0.859209	0.642436	0.617102	0.735441	0.67392	0.383148	1.17528	0.583142	0.494001	0.689386	0.81838	0.73467	0.720649	0.679808	0.183392	0.0579936
			0.885584	0.502704	0.546589	0.749842	0.499542	0.906468	0.663864	0.618565	0.714524	0.6368	0.408047	1.08288	0.595259	0.553138	0.672537	0.808506	0.767829	0.715148	0.684879	0.166619	0.0526896
			0.908751	0.520612	0.554606	0.779562	0.5414	0.90682	0.66665	0.62482	0.800228	0.629627	0.425683	0.949619	0.622098	0.54131	0.670811	0.828788	0.758822	0.722192	0.6918	0.149884	0.0473975
		3.5	0.94491	0.528673	0.555418	0.811516	0.550497	0.890316	0.665863	0.611197	0.801739	0.600896	0.412567	1.02537	0.596292	0.561277	0.614352	0.841448	0.727711	0.772271	0.695128	0.164827	0.052123
			0.936514	0.540801	0.596725	0.771537	0.559345	0.852744	0.696603	0.647412	0.682323	0.592645	0.429936	1.03146	0.623881	0.551217	0.676292	0.829102	0.801178	0.720459	0.696676	0.152086	0.0480938
			0.979786	0.575552	0.617661	0.700063	0.591427	0.832493	0.697312	0.649352	0.6549	0.592949	0.44558	1.09682	0.601299	0.552815	0.614479	0.811675	0.781882	0.694378	0.693913	0.158191	0.0500244
		4	0.985062	0.585618	0.688126	0.675145	0.565572	0.856689	0.696319	0.615476	0.643833	0.56898	0.461587	1.06442	0.594609	0.476978	0.662717	0.819091	0.833721	0.712126	0.694782	0.162481	0.0513811
			1.04743	0.581579	0.711506	0.709514	0.569888	0.8665	0.718638	0.625019	0.759688	0.612451	0.464827	1.09468	0.651538	0.472138	0.666675	0.864694	0.751934	0.718361	0.715947	0.169573	0.0536238
			1.06569	0.588623	0.740142	0.767783	0.576013	0.947952	0.728254	0.637709	0.751672	0.605634	0.485108	1.08062	0.650323	0.445657	0.679337	0.854614	0.788288	0.697009	0.727246	0.175303	0.0554355
		4.5	1.0773	0.581027	0.762927	0.694541	0.60031	0.970115	0.714272	0.663293	0.726023	0.623039	0.470939	1.13545	0.620772	0.4556	0.684235	0.860159	0.807979	0.653524	0.727861	0.185566	0.058681
			1.08121	0.586644	0.793141	0.761155	0.588082	0.985914	0.731999	0.720967	0.678546	0.611068	0.474575	1.08388	0.610596	0.498306	0.766881	0.859272	0.851151	0.628231	0.739534	0.180073	0.0569441
			1.10194	0.60058	0.804432	0.712366	0.587291	0.996753	0.759243	0.769274	0.750809	0.597105	0.5112	1.11091	0.659476	0.495741	0.762846	0.900914	0.819889	0.629563	0.753907	0.182135	0.057596
		5	1.08967	0.604564	0.78495	0.764203	0.546993	0.985772	0.757268	0.784529	0.684542	0.605045	0.470473	1.07229	0.651124	0.500014	0.720698	0.88081	0.908375	0.647617	0.747719	0.182951	0.0578543

## Sheet: Fig5C
	Mobile fraction = final three time points from recovery curves averaged																																			Prism outputs
																																				Parameter					Parameter					Parameter
	WT	image 1	image 2	image 3	image 4	image 5	image 6	image 7	image 8	image 9	image 10	image 11	image 12	image 13	image 14	image 15	image 16	image 17	image 18	image 19	image 20	image 21	image 22	image 23												Table Analyzed	FRAP - Mobile fraction				Table Analyzed	FRAP - Mobile fraction				Table Analyzed	FRAP - Mobile fraction
		0.170709	0.147239	0.0613881	0.0645629	0.112615	0.268892	0.155778	0.200474	0.215666	0.117178	0.088091	0.141538	0.24291	0.293412	0.0205502	0.116326	0.203482	0.036294	0.124192	0.0960851	0.0195642	0.0917763	0.1												Column A	WT				Column A	WT				Column B	Crsh
		0.167158	0.153796	0.0553695	0.0631017	0.111705	0.276397	0.161062	0.191428	0.216748	0.127149	0.087387	0.14241	0.243263	0.292104	0.0275763	0.104992	0.244105	0.0525744	0.0817566	0.0993975	0.0227603	0.106625	0.112406												vs	vs				vs	vs				vs	vs
		0.160601	0.160021	0.0590379	0.0638016	0.121447	0.28225	0.158133	0.201694	0.250869	0.102791	0.0843864	0.157048	0.242752	0.261569	0.0253151	0.106457	0.257001	0.0414215	0.0637701	0.119689	0.0125262	0.107806	0.144553												Column B	Crsh				Column C	dN				Column C	dN
	average	0.166156	0.153685	0.0585985	0.063822	0.115256	0.275847	0.158324	0.197865	0.227761	0.115706	0.0866215	0.146998	0.242975	0.282361	0.0244805	0.109258	0.234862	0.04343	0.0899063	0.105057	0.0182836	0.102069	0.118986
																																				Unpaired t test with Welch's correction					Unpaired t test with Welch's correction					Unpaired t test
	Crsh	image 1	image 2	image 3	image 4	image 5	image 6	image 7	image 8	image 9	image 10	image 11	image 12	image 13	image 14	image 15	image 16	image 17	image 18	image 19	image 20	image 21	image 22	image 23	image 24	image 25	image 26	image 27	image 28	image 29	image 30	image 31	image 32	image 33		P value	< 0.0001				P value	< 0.0001				P value	0.0003
		0.363193	0.659859	0.191413	0.474813	0.412721	0.38024	0.53692	0.574395	0.662261	1.02303	0.720523	0.84127	0.501266	0.327451	0.539874	0.178733	0.526516	0.370945	0.555168	0.738265	0.148978	0.436582	0.379841	0.546975	0.132158	0.699752	0.421645	0.849139	0.153081	0.502241	0.530658	0.298899	0.96788		P value summary	****				P value summary	****				P value summary	***
		0.36024	0.670533	0.218798	0.530722	0.414605	0.371121	0.59111	0.543947	0.722536	1.02741	0.683967	0.852399	0.539126	0.336045	0.531899	0.234832	0.395884	0.294171	0.543697	0.787675	0.153611	0.454167	0.342353	0.58601	0.165797	0.696083	0.433844	0.926855	0.15613	0.4674	0.582981	0.25316	1		Are means signif. different? (P < 0.05)	Yes				Are means signif. different? (P < 0.05)	Yes				Are means signif. different? (P < 0.05)	Yes
		0.347542	0.679594	0.239214	0.554483	0.434459	0.375984	0.612953	0.549241	0.682659	1.01293	0.658124	0.838282	0.517947	0.361382	0.508022	0.204035	0.425749	0.243117	0.675395	0.697777	0.152537	0.431727	0.338222	0.575504	0.130646	0.735162	0.42417	0.819583	0.160207	0.537218	0.573409	0.316161	0.864296		One- or two-tailed P value?	Two-tailed				One- or two-tailed P value?	Two-tailed				One- or two-tailed P value?	Two-tailed
	average	0.356992	0.669995	0.216475	0.520006	0.420595	0.375782	0.580328	0.555861	0.689152	1.02112	0.687538	0.843983	0.519446	0.341626	0.526598	0.205867	0.449383	0.302744	0.59142	0.741239	0.151709	0.440825	0.353472	0.569496	0.142867	0.710332	0.426553	0.865192	0.156473	0.502287	0.562349	0.289407	0.944059		Welch-corrected t, df	t=8.646 df=41				Welch-corrected t, df	t=13.41 df=21				t, df	t=3.847 df=49
	dN	image 1	image 2	image 3	image 4	image 5	image 6	image 7	image 8	image 9	image 10	image 11	image 12	image 13	image 14	image 15	image 16	image 17	image 18																	How big is the difference?					How big is the difference?					How big is the difference?
		1.08121	0.586644	0.793141	0.761155	0.588082	0.985914	0.731999	0.720967	0.678546	0.611068	0.474575	1.08388	0.610596	0.498306	0.766881	0.859272	0.851151	0.628231																	Mean ± SEM of column A	0.1364 ± 0.01608 N=23				Mean ± SEM of column A	0.1364 ± 0.01608 N=23				Mean ± SEM of column B	0.5070 ± 0.03973 N=33
		1.10194	0.60058	0.804432	0.712366	0.587291	0.996753	0.759243	0.769274	0.750809	0.597105	0.5112	1.11091	0.659476	0.495741	0.762846	0.900914	0.819889	0.629563																	Mean ± SEM of column B	0.5070 ± 0.03973 N=33				Mean ± SEM of column C	0.7471 ± 0.04261 N=18				Mean ± SEM of column C	0.7471 ± 0.04261 N=18
		1.08967	0.604564	0.78495	0.764203	0.546993	0.985772	0.757268	0.784529	0.684542	0.605045	0.470473	1.07229	0.651124	0.500014	0.720698	0.88081	0.908375	0.647617																	Difference between means	-0.3706 ± 0.04286				Difference between means	-0.6106 ± 0.04555				Difference between means	-0.2400 ± 0.06240
	average	1.09094	0.597262	0.794174	0.745908	0.574122	0.989479	0.749503	0.758257	0.704633	0.604406	0.485416	1.08902	0.640399	0.49802	0.750142	0.880332	0.859805	0.635137																	95% confidence interval	-0.4571 to -0.2840				95% confidence interval	-0.7053 to -0.5159				95% confidence interval	-0.3656 to -0.1145
																																				R square	0.6458				R square	0.8954				R square	0.232
		image	WT	Crsh	dN																															F test to compare variances					F test to compare variances					F test to compare variances
		1	0.166156	0.356992	1.09094																															F,DFn, Dfd	8.755, 32, 22				F,DFn, Dfd	5.495, 17, 22				F,DFn, Dfd	1.593, 32, 17
		2	0.153685	0.669995	0.597262																															P value	< 0.0001				P value	0.0003				P value	0.311
		3	0.0585985	0.216475	0.794174																															P value summary	****				P value summary	***				P value summary	ns
		4	0.063822	0.520006	0.745908																															Are variances significantly different?	Yes				Are variances significantly different?	Yes				Are variances significantly different?	No
		5	0.115256	0.420595	0.574122
		6	0.275847	0.375782	0.989479
		7	0.158324	0.580328	0.749503
		8	0.197865	0.555861	0.758257																															Parameter
		9	0.227761	0.689152	0.704633																															Table Analyzed	FRAP - Mobile fraction
		10	0.115706	1.02112	0.604406
		11	0.0866215	0.687538	0.485416																															One-way analysis of variance
		12	0.146998	0.843983	1.08902																															P value	< 0.0001
		13	0.242975	0.519446	0.640399																															P value summary	****
		14	0.282361	0.341626	0.49802																															Are means signif. different? (P < 0.05)	Yes
		15	0.0244805	0.526598	0.750142																															Number of groups	3
		16	0.109258	0.205867	0.880332																															F	59.7
		17	0.234862	0.449383	0.859805																															R square	0.6271
		18	0.04343	0.302744	0.635137
		19	0.0899063	0.59142																																Bartlett's test for equal variances
		20	0.105057	0.741239																																Bartlett's statistic (corrected)	23.09
		21	0.0182836	0.151709																																P value	< 0.0001
		22	0.102069	0.440825																																P value summary	****
		23	0.118986	0.353472																																Do the variances differ signif. (P < 0.05)	Yes
		24		0.569496
		25		0.142867																																ANOVA Table	SS	df	MS
		26		0.710332																																Treatment (between columns)	3.957	2	1.978
		27		0.426553																																Residual (within columns)	2.353	71	0.03314
		28		0.865192																																Total	6.31	73
		29		0.156473
		30		0.502287																																Tukey's Multiple Comparison Test	Mean Diff.	q	Significant? P < 0.05?	Summary	95% CI of diff
		31		0.562349																																WT vs Crsh	-0.3706	10.6	Yes	***	-0.4891 to -0.2520
		32		0.289407																																WT vs dN	-0.6106	15.07	Yes	***	-0.7480 to -0.4732
		33		0.944059																																Crsh vs dN	-0.24	6.364	Yes	***	-0.3680 to -0.1121
		average	0.136448	0.507005	0.747053
		standard deviation	0.0771252	0.228204	0.180795
		standard error	0.0160817	0.0397253	0.0426137

## Sheet: Fig5-S2
	Normalized FRAP recovery curves											Mobile fraction = final three time points from recovery curves averaged
						n = 7	n = 4	n = 7	n = 5
		avg	avg	avg	avg	se	se	se	se			WT-cell border	image 1	image 2	image 3	image 4	image 5	image 6
	time (min)	WT-cell border	WT-free edge	Crsh-cell border	Crsh-free edge	WT-cell border	WT-free edge	Crsh-cell border	Crsh-free edge				0.170709	0.147238	0.0613881	0.0645629	0.112616	0.268898
	-0.5	0.969614	0.956691	0.983719	0.951962	0.00996975	0.0160342	0.00902145	0.0182776				0.167158	0.153795	0.0553695	0.0631017	0.111705	0.276402
		0.98565	0.988831	0.989342	0.98865	0.00647683	0.00404361	0.0044539	0.00393362				0.160601	0.16002	0.0590379	0.0638016	0.121448	0.282256
		0.986497	0.981806	0.990994	0.996696	0.00679665	0.0117566	0.00580419	0.0033045			average	0.166156	0.153684	0.0585985	0.063822	0.115256	0.275852
	0	0	0	0	0	0	0	0	0
		0.0144713	0.0608944	0.0435623	0.0841392	0.00335472	0.0309944	0.00323503	0.0343759			WT-free edge	image 1	image 2	image 3	image 4
		0.0187075	0.0913592	0.0689398	0.120324	0.00551905	0.0371218	0.00778003	0.0429762				0.209072	0.40983	0.631888	0.287742
	0.5	0.0285167	0.124657	0.0866133	0.151382	0.0055818	0.0383014	0.00932985	0.0499927				0.203753	0.417108	0.653659	0.263749
		0.0352705	0.142203	0.104248	0.172664	0.00853182	0.0419991	0.00876152	0.0502911				0.206023	0.43614	0.687194	0.269397
		0.0413545	0.168058	0.123548	0.185188	0.00890969	0.0449245	0.0127623	0.052262			average	0.206283	0.421026	0.65758	0.273629
	1	0.0480271	0.173686	0.136456	0.205639	0.00969035	0.043363	0.0151795	0.0500983
		0.0563699	0.189593	0.155886	0.222443	0.00939038	0.0522578	0.020196	0.0483825			Crsh-cell border	image 1	image 2	image 3	image 4	image 5	image 6
		0.061723	0.209526	0.176677	0.248972	0.0121826	0.053916	0.0228497	0.0493441				0.363193	0.659859	0.191413	0.474813	0.412721	0.38024
	1.5	0.0627059	0.227541	0.188768	0.261922	0.0125832	0.0624349	0.0243232	0.0535418				0.36024	0.670533	0.218798	0.530722	0.414605	0.371121
		0.0677265	0.259511	0.206307	0.279593	0.0130573	0.0537477	0.0271807	0.047049				0.347542	0.679594	0.239214	0.554483	0.434459	0.375984
		0.0719702	0.263175	0.221801	0.302526	0.0121116	0.0646368	0.0289417	0.050173			average	0.356992	0.669995	0.216475	0.520006	0.420595	0.375782
	2	0.0737086	0.274337	0.249558	0.304337	0.0147541	0.0748	0.0307742	0.0466934
		0.0774262	0.27621	0.26666	0.307789	0.0162414	0.0758506	0.0279654	0.0495198			Crsh-free edge	image 1	image 2	image 3	image 4	image 5
		0.0833958	0.285735	0.278746	0.333213	0.0178712	0.0736389	0.0375875	0.0530517				0.153369	0.418867	0.518875	0.617641	0.585851
	2.5	0.0901503	0.286364	0.292857	0.344928	0.0171161	0.0801268	0.0358175	0.0584221				0.168097	0.39273	0.520015	0.648785	0.568909
		0.0922852	0.297491	0.300713	0.347817	0.0176749	0.0750427	0.0363428	0.0622411				0.202973	0.432512	0.553277	0.738465	0.567442
		0.0938029	0.303782	0.316506	0.385747	0.0173494	0.0943719	0.0423457	0.0767516			average	0.174813	0.414703	0.530723	0.668297	0.574067
	3	0.0987336	0.329359	0.334585	0.37326	0.0177061	0.0903693	0.0387773	0.0740545
		0.101616	0.317653	0.350554	0.394344	0.0186921	0.0846865	0.0469856	0.0759165
		0.107112	0.317678	0.350718	0.393291	0.0189438	0.0855314	0.0490374	0.0834565				image	WT-cell border	WT-free edge	Crsh-cell border	Crsh-free edge
	3.5	0.114526	0.326582	0.355936	0.416992	0.0188852	0.0851663	0.0449631	0.0823419				1	0.166156	0.206283	0.356992	0.174813
		0.113211	0.32511	0.3748	0.397884	0.0205303	0.0892721	0.0439801	0.0885294				2	0.153684	0.421026	0.669995	0.414703
		0.120587	0.340116	0.374152	0.400117	0.0219844	0.09529	0.0439998	0.0860082				3	0.0585985	0.65758	0.216475	0.530723
	4	0.123415	0.338173	0.387817	0.413365	0.0235568	0.0870405	0.0481945	0.0906387				4	0.063822	0.273629	0.520006	0.668297
		0.125784	0.342895	0.398432	0.407717	0.0241168	0.089557	0.0492589	0.0796286				5	0.115256		0.420595	0.574067
		0.131808	0.341945	0.408283	0.425934	0.0246656	0.0902021	0.0507844	0.0802073				6	0.275852		0.375782
	4.5	0.135621	0.369293	0.407545	0.423762	0.0266309	0.0970443	0.0468522	0.0797396				7	0.158322		0.580328
		0.14017	0.384633	0.431308	0.45892	0.0269387	0.0921862	0.0557257	0.0836254				average	0.14167	0.38963	0.448596	0.472521
		0.141227	0.384568	0.451018	0.459707	0.0283862	0.100316	0.0585624	0.0839152				standard deviation	0.073807	0.19988	0.152658	0.189737
	5	0.143613	0.399688	0.463461	0.498934	0.028454	0.107421	0.0596744	0.0886076				standard error	0.0278964	0.0999398	0.0576995	0.0848529
