# Supplementary material for: Celsr1 adhesive interactions mediate the asymmetric organization of planar polarity complexes
Source: eLife. 2021 Feb 2;10:e62097. doi: 10.7554/eLife.62097 (PMC7857726; doi:10.7554/eLife.62097)
Supplement: Figure 6—source data 1. [file elife-62097-fig6-data1.xlsx]

## Sheet: Fig6C
Border Enrichment
												Prism output
		Ethanol					B/B homodimerizer					Parameter
	border #	border	non-border	ratio		border #	border	non-border	ratio			Table Analyzed	FKBP_border enrichment
	1	1269.91	519.386	2.44503		1	5344.43	1400.89	3.81503			Column A	EtOH
	2	1501.53	651.254	2.30559		2	5004.95	1115.6	4.48634			vs	vs
	3	1143.31	614.525	1.86048		3	1433.3	667.078	2.14863			Column B	BB
	4	5496.63	2066.08	2.66041		4	1387.09	745.459	1.86072
	5	2018.37	790.403	2.5536		5	2364.02	1032.89	2.28875			Unpaired t test with Welch's correction
	6	1056.53	514.829	2.05219		6	2957.8	755.437	3.91535			P value	0.0057
	7	1841.09	855.315	2.15252		7	4697.8	1589.73	2.9551			P value summary	**
	8	1049.92	675.254	1.55485		8	3493.51	1468.12	2.37958			Are means signif. different? (P < 0.05)	Yes
	9	1879.46	1030.34	1.82411		9	5083.74	1342.53	3.78669			One- or two-tailed P value?	One-tailed
	10	1618.52	847.484	1.9098		10	771.795	471.632	1.63643			Welch-corrected t, df	t=2.947 df=13
	11	1859.23	957.108	1.94255		11	1170.71	552.655	2.11834
	12	1815.66	1105.95	1.64172		12	1485.49	506.854	2.9308			How big is the difference?
	13	1968.78	1084.64	1.81514								Mean ± SEM of column A	2.011 ± 0.09947 N=14
	14	937.19	653.345	1.43445								Mean ± SEM of column B	2.860 ± 0.2704 N=12
												Difference between means	-0.8493 ± 0.2881
			average	2.01089				average	2.86015			95% confidence interval	-1.472 to -0.2269
			standard deviation	0.372183				standard deviation	0.936752			R square	0.4006
			standard error	0.0994702				standard error	0.270417
												F test to compare variances
												F,DFn, Dfd	6.335, 11, 13
												P value	0.0025
												P value summary	**
												Are variances significantly different?	Yes
