# Supplementary material for: Celsr1 adhesive interactions mediate the asymmetric organization of planar polarity complexes
Source: eLife. 2021 Feb 2;10:e62097. doi: 10.7554/eLife.62097 (PMC7857726; doi:10.7554/eLife.62097)
Supplement: Figure 7—source data 1. [file elife-62097-fig7-data1.xlsx]

## Sheet: Fig 7C
	Co-Immunoprecipitation					t-Test: Two-Sample Assuming Unequal Variances
		Fz: Crsh/WT	Vangl: Crsh/WT
	Exp1	0.870509	0.43436				Fz: Crsh/WT	Vangl: Crsh/WT
	Exp2	1.92008	0.850989			Mean	1.22604	0.666336
	Exp3	0.88754	0.713659			Variance	0.361336	0.0450745
						Observations	3	3
	avg	1.22604	0.666336			Hypothesized Mean Difference	0
	sd	0.601112	0.212308			df	2
	se	0.347052	0.122576			t Stat	1.52068
						P(T<=t) one-tail	0.133862
						t Critical one-tail	2.91999
						P(T<=t) two-tail	0.267724
						t Critical two-tail	4.30265
