# Supplementary material for: Celsr1 adhesive interactions mediate the asymmetric organization of planar polarity complexes
Source: eLife. 2021 Feb 2;10:e62097. doi: 10.7554/eLife.62097 (PMC7857726; doi:10.7554/eLife.62097)
Supplement: Figure 8—source data 1. [file elife-62097-fig8-data1.xlsx]

## Sheet: Fig8F
Pearson's
	vertical borders							horizontal borders								per emyro quantification
	wt			crsh				wt			crsh
	embryo	border	pearson's	embryo	border	pearson's		embryo	border	pearson's	embryo	border	pearson's			vertical borders				t-Test: Two-Sample Assuming Unequal Variances
	1	1	0.66	1	1	0.22		1	1	0.22	1	1	0.16				average				Y Wt Avg	Y Crsh Avg
		2	0.76		2	0.3			2	0.29		2	0.48				wt	crsh		Mean	0.712778	0.3775
		3	0.59		3	0.34			3	0.15		3	0.29			Embryo 1	0.666667	0.3075		Variance	0.00385093	0.00260324
		4	0.66		4	0.42			4	0.3		4	0.6			Embryo 2	0.783333	0.385833		Observations	3	4
		5	0.82		5	0.25			5	0.52		5	0.12			Embryo 3	0.688333	0.386667		Hypothesized Mean Difference	0
		6	0.78		6	0.5			6	0.68		6	0.39			Embryo 4		0.43		df	4
		7	0.58		7	0.25			7	0.29		7	0.53							t Stat	7.623
		8	0.4		8	0.18			8	0.24		8	0.23			Average	0.712778	0.3775		P(T<=t) one-tail	0.000794999
		9	0.81		9	0.18			9	0.26		9	0.5			Standard Deviation	0.0620558	0.051022		t Critical one-tail	2.13185
		10	0.6		10	0.42		2	10	0.13	2	10	0.52			Standard Error	0.0358279	0.025511		P(T<=t) two-tail	0.00159
		11	0.62		11	0.27			11	0.43		11	0.32							t Critical two-tail	2.77645
		12	0.72		12	0.36			12	0.49		12	0.48
	2	13	0.85	2	13	0.55			13	0.3		13	0.56
		14	0.85		14	0.37			14	0.54		14	0.43
		15	0.73		15	0.51			15	0.35		15	0.56			horizontal borders				t-Test: Two-Sample Assuming Unequal Variances
		16	0.83		16	0.34			16	0.58		16	0.49				average				Y Wt Avg	Y Crsh Avg
		17	0.71		17	0.31			17	0.42		17	0.4				wt	crsh		Mean	0.386296	0.386667
		18	0.77		18	0.25			18	0.29		18	0.3			Embryo 1	0.327778	0.366667		Variance	0.00311276	0.00263786
		19	0.85		19	0.53		3	19	0.43	3	19	0.61			Embryo 2	0.392222	0.451111		Observations	3	4
		20	0.9		20	0.42			20	0.6		20	0.3			Embryo 3	0.438889	0.33		Hypothesized Mean Difference	0
		21	0.8		21	0.29			21	0.43		21	0.25			Embryo 4		0.398889		df	4
		22	0.85		22	0.15			22	0.22		22	0.44							t Stat	-0.0089906
		23	0.69		23	0.4			23	0.54		23	0.37			Average	0.386296	0.386667		P(T<=t) one-tail	0.496629
		24	0.57		24	0.51			24	0.34		24	0.26			Standard Deviation	0.0557921	0.0513601		t Critical one-tail	2.13185
	3	25	0.68	3	25	0.37			25	0.37		25	0.08			Standard Error	0.0322116	0.0256801		P(T<=t) two-tail	0.993257
		26	0.45		26	0.48			26	0.37		26	0.25							t Critical two-tail	2.77645
		27	0.72		27	0.43			27	0.65		27	0.41
		28	0.72		28	0.4					4	28	0.41
		29	0.67		29	0.45						29	0.4
		30	0.7		30	0.13						30	0.62
		31	0.77		31	0.31						31	0.26
		32	0.74		32	0.49						32	0.42
		33	0.67		33	0.41						33	0.33
		34	0.72		34	0.4						34	0.53
		35	0.68		35	0.26						35	0.22
		36	0.74		36	0.51						36	0.4
				4	37	0.52
					38	0.45
					39	0.5
					40	0.46
					41	0.45
					42	0.44
					43	0.43
					44	0.39
					45	0.14
					46	0.54
					47	0.48
					48	0.36

## Sheet: Fig8 - figure supplement 1C
Pearson's
	vertical borders									horizontal borders										per emyro quantification
	wt				crsh					wt				crsh												Celsr1/Fz6				Celsr1/Vangl2
	embryo	border	pearson's (Celsr1/Fz6)	pearson's (Celsr1/Vangl2)	embryo	border	pearson's (Celsr1/Fz6)	pearson's (Celsr1/Vangl2)		embryo	border	pearson's (Celsr1/Fz6)	pearson's (Celsr1/Vangl2)	embryo	border	pearson's (Celsr1/Fz6)	pearson's (Celsr1/Vangl2)			vertical borders						t-Test: Two-Sample Assuming Unequal Variances				t-Test: Two-Sample Assuming Unequal Variances
	1	1	0.77	0.74	1	1	0.34	0.32		1	1	0.26	0.59	1	1	0.24	0.39				average - Celsr1/Fz6		average - Celsr1/Vangl2
		2	0.67	0.82		2	0.25	0.21			2	0.39	0.68		2	0.46	0.39				wt	crsh	wt	crsh			Y Wt Avg	Y Crsh Avg			Y Wt Avg	Y Crsh Avg
		3	0.64	0.69		3	0.41	0.38			3	0.12	0.36		3	0.26	0.36			Embryo 1	0.679167	0.3475	0.725833	0.305833		Mean	0.731667	0.390417		Mean	0.781667	0.460208
		4	0.57	0.68		4	0.45	0.27			4	0.26	0.69		4	0.39	0.29			Embryo 2	0.7925	0.396667	0.829167	0.483333		Variance	0.00326319	0.00106505		Variance	0.00272153	0.013327
		5	0.75	0.73		5	0.51	0.11			5	0.45	0.57		5	0.14	0.26			Embryo 3	0.723333	0.390833	0.79	0.466667		Observations	3	4		Observations	3	4
		6	0.79	0.83		6	0.33	0.31			6	0.75	0.89		6	0.3	0.37			Embryo 4		0.426667		0.585		Hypothesized Mean Difference	0			Hypothesized Mean Difference	0
		7	0.65	0.75		7	0.34	0.41			7	0.31	0.46		7	0.57	0.47									df	3			df	4
		8	0.47	0.47		8	0.23	0.28			8	0.35	0.51		8	0.38	0.44			Average	0.731667	0.390417	0.781667	0.460208		t Stat	9.27394			t Stat	4.93738
		9	0.85	0.82		9	0.13	0.22			9	0.29	0.53		9	0.49	0.37			Standard Deviation	0.0571244	0.032635	0.0521683	0.115443		P(T<=t) one-tail	0.00132667			P(T<=t) one-tail	0.00391571
		10	0.56	0.71		10	0.42	0.5		2	10	0.18	0.48	2	10	0.32	0.51			Standard Error	0.0329808	0.0163175	0.0301194	0.0577214		t Critical one-tail	2.35336			t Critical one-tail	2.13185
		11	0.64	0.76		11	0.34	0.35			11	0.28	0.65		11	0.41	0.28									P(T<=t) two-tail	0.00265333			P(T<=t) two-tail	0.00783143
		12	0.79	0.71		12	0.42	0.31			12	0.54	0.86		12	0.51	0.59									t Critical two-tail	3.18245			t Critical two-tail	2.77645
	2	13	0.86	0.88	2	13	0.49	0.6			13	0.13	0.29		13	0.64	0.59
		14	0.89	0.87		14	0.48	0.57			14	0.56	0.79		14	0.42	0.55									Celsr1/Fz6				Celsr1/Vangl2
		15	0.72	0.8		15	0.5	0.53			15	0.26	0.56		15	0.58	0.59			horizontal borders						t-Test: Two-Sample Assuming Unequal Variances				t-Test: Two-Sample Assuming Unequal Variances
		16	0.86	0.85		16	0.43	0.49			16	0.61	0.85		16	0.56	0.5				average - Celsr1/Fz6		average - Celsr1/Vangl2
		17	0.71	0.85		17	0.36	0.35			17	0.52	0.66		17	0.35	0.45				wt	crsh	wt	crsh			Y Wt Avg	Y Crsh Avg			Y Wt Avg	Y Crsh Avg
		18	0.89	0.83		18	0.44	0.48			18	0.18	0.61		18	0.29	0.39			Embryo 1	0.353333	0.358889	0.586667	0.371111		Mean	0.411852	0.368889		Mean	0.615556	0.447222
		19	0.92	0.91		19	0.39	0.47		3	19	0.54	0.65	3	19	0.55	0.62			Embryo 2	0.362222	0.453333	0.638889	0.494444		Variance	0.00879177	0.00339342		Variance	0.000704938	0.00287284
		20	0.85	0.9		20	0.4	0.35			20	0.7	0.74		20	0.46	0.5			Embryo 3	0.52	0.322222	0.621111	0.452222		Observations	3	4		Observations	3	4
		21	0.84	0.87		21	0.26	0.37			21	0.5	0.73		21	0.26	0.4			Embryo 4		0.341111		0.471111		Hypothesized Mean Difference	0			Hypothesized Mean Difference	0
		22	0.85	0.86		22	0.21	0.61			22	0.29	0.24		22	0.43	0.39									df	3			df	5
		23	0.6	0.68		23	0.41	0.47			23	0.5	0.59		23	0.25	0.47			Average	0.411852	0.368889	0.615556	0.447222		t Stat	0.69889			t Stat	5.45231
		24	0.52	0.65		24	0.39	0.51			24	0.64	0.58		24	0.29	0.28			Standard Deviation	0.0937644	0.058253	0.0265507	0.0535989		P(T<=t) one-tail	0.267465			P(T<=t) one-tail	0.00141038
	3	25	0.74	0.77	3	25	0.36	0.54			25	0.41	0.63		25	0.11	0.44			Standard Error	0.0541349	0.0291265	0.015329	0.0267994		t Critical one-tail	2.35336			t Critical one-tail	2.01505
		26	0.49	0.65		26	0.44	0.51			26	0.46	0.72		26	0.26	0.44									P(T<=t) two-tail	0.53493			P(T<=t) two-tail	0.00282076
		27	0.67	0.77		27	0.43	0.43			27	0.64	0.71		27	0.29	0.53									t Critical two-tail	3.18245			t Critical two-tail	2.57058
		28	0.79	0.81		28	0.3	0.56						4	28	0.24	0.29
		29	0.73	0.78		29	0.6	0.56							29	0.34	0.33
		30	0.84	0.79		30	0.24	0.37							30	0.35	0.47
		31	0.75	0.82		31	0.28	0.62							31	0.4	0.41
		32	0.77	0.81		32	0.45	0.51							32	0.35	0.43
		33	0.72	0.8		33	0.45	0.52							33	0.27	0.59
		34	0.68	0.82		34	0.25	0.13							34	0.62	0.74
		35	0.74	0.84		35	0.45	0.38							35	0.22	0.59
		36	0.76	0.82		36	0.44	0.47							36	0.28	0.39
					4	37	0.59	0.7
						38	0.47	0.56
						39	0.42	0.54
						40	0.33	0.4
						41	0.57	0.73
						42	0.44	0.71
						43	0.41	0.58
						44	0.34	0.61
						45	0.23	0.51
						46	0.42	0.58
						47	0.46	0.61
						48	0.44	0.49
